# Supplementary material for: Stephapierrines A–H, new tetrahydroprotoberberine and aporphine alkaloids from the tubers of Stephania pierrei Diels and their anti-cholinesterase activities
Source: Royal Society of Chemistry journal article supplement (doi:10.1039/d1ra03276c), 2021-01-01
Supplement: d1ra03276c1.pdf [file d1ra03276c1.pdf]

## Supplementary Information

### **Stephapierrines A–H, new tetrahydroprotoberberine and aporphine alkaloids from the tubers of *Stephania pierrei* Diels and their anti-cholinesterase activities**

Waraluck Chaichompoo,<sup>a</sup> Pornchai Rojsitthisak,<sup>\*a,b</sup> Wachirachai Pabuprapap,<sup>c</sup> Yuttana Siritattanasathien,<sup>c</sup> Pathumwadee Yotmanee,<sup>c</sup> Woraphot Haritakun<sup>d</sup> and Apichart Suksamrarn<sup>c</sup>

<sup>a</sup>*Department of Food and Pharmaceutical Chemistry, Faculty of Pharmaceutical Sciences, Chulalongkorn University, Bangkok 10330, Thailand*

<sup>b</sup>*Natural Products for Aging and Chronic Diseases Research Unit, Chulalongkorn University, Bangkok 10330, Thailand*

<sup>c</sup>*Department of Chemistry and Center of Excellence for Innovation in Chemistry, Faculty of Science, Ramkhamhaeng University, Bangkok 10240, Thailand*

<sup>d</sup>*Program in Chemical Technology, Faculty of Science and Technology, Suan Dusit University, Bangkok 10700, Thailand*

\* Correspondence: pornchai.r@chula.ac.th; Tel.: +66-2-218-8310; Fax: +66-2-254-5195

## List of Figures

| Figure      | Contents                                                                                           | Page |
|-------------|----------------------------------------------------------------------------------------------------|------|
| <b>S1.</b>  | <sup>1</sup> H NMR spectrum (CDCl <sub>3</sub> , 400 MHz) of stephapierrine A (1)                  | 10   |
| <b>S2.</b>  | Expansion of <sup>1</sup> H NMR spectrum (CDCl <sub>3</sub> , 400 MHz) of stephapierrine A (1) (1) | 10   |
| <b>S3.</b>  | Expansion of <sup>1</sup> H NMR spectrum (CDCl <sub>3</sub> , 400 MHz) of stephapierrine A (1) (2) | 11   |
| <b>S4.</b>  | <sup>13</sup> C NMR spectrum (CDCl <sub>3</sub> , 100 MHz) of stephapierrine A (1)                 | 11   |
| <b>S5.</b>  | DEPT135 spectrum (CDCl <sub>3</sub> , 100 MHz) of stephapierrine A (1)                             | 12   |
| <b>S6.</b>  | COSY spectrum of stephapierrine A (1) in CDCl <sub>3</sub>                                         | 12   |
| <b>S7.</b>  | Expansion of COSY spectrum of stephapierrine A (1) in CDCl <sub>3</sub>                            | 13   |
| <b>S8.</b>  | HMQC spectrum of stephapierrine A (1) in CDCl <sub>3</sub>                                         | 13   |
| <b>S9.</b>  | Expansion of HMQC spectrum of stephapierrine A (1) in CDCl <sub>3</sub> (1)                        | 14   |
| <b>S10.</b> | Expansion of HMQC spectrum of stephapierrine A (1) in CDCl <sub>3</sub> (2)                        | 14   |
| <b>S11.</b> | HMBC spectrum of stephapierrine A (1) in CDCl <sub>3</sub>                                         | 15   |
| <b>S12.</b> | Expansion of HMBC spectrum of stephapierrine A (1) in CDCl <sub>3</sub> (1)                        | 15   |
| <b>S13.</b> | Expansion of HMBC spectrum of stephapierrine A (1) in CDCl <sub>3</sub> (2)                        | 16   |
| <b>S14.</b> | Expansion of HMBC spectrum of stephapierrine A (1) in CDCl <sub>3</sub> (3)                        | 16   |
| <b>S15.</b> | NOESY spectrum of stephapierrine A (1) in CDCl <sub>3</sub>                                        | 17   |
| <b>S16.</b> | Expansion of NOESY spectrum of stephapierrine A (1) in CDCl <sub>3</sub> (1)                       | 17   |
| <b>S17.</b> | Expansion of NOESY spectrum of stephapierrine A (1) in CDCl <sub>3</sub> (2)                       | 18   |
| <b>S18.</b> | ESI-TOF-MS of stephapierrine A (1)                                                                 | 18   |
| <b>S19.</b> | IR spectrum of stephapierrine A (1)                                                                | 19   |
| <b>S20.</b> | <sup>1</sup> H NMR spectrum (CDCl <sub>3</sub> , 400 MHz) of stephapierrine B (2)                  | 19   |
| <b>S21.</b> | Expansion of <sup>1</sup> H NMR spectrum (CDCl <sub>3</sub> , 400 MHz) of stephapierrine B (2) (1) | 20   |
| <b>S22.</b> | Expansion of <sup>1</sup> H NMR spectrum (CDCl <sub>3</sub> , 400 MHz) of stephapierrine B (2) (2) | 20   |
| <b>S23.</b> | <sup>13</sup> C NMR spectrum (CDCl <sub>3</sub> , 100 MHz) of stephapierrine B (2)                 | 21   |
| <b>S24.</b> | DEPT135 spectrum (CDCl <sub>3</sub> , 100 MHz) of stephapierrine B (2)                             | 21   |
| <b>S25.</b> | COSY spectrum of stephapierrine B (2) in CDCl <sub>3</sub>                                         | 22   |
| <b>S26.</b> | Expansion of COSY spectrum of stephapierrine B (2) in CDCl <sub>3</sub>                            | 22   |
| <b>S27.</b> | HMQC spectrum of stephapierrine B (2) in CDCl <sub>3</sub>                                         | 23   |
| <b>S28.</b> | Expansion of HMQC spectrum of stephapierrine B (2) in CDCl <sub>3</sub> (1)                        | 23   |
| <b>S29.</b> | Expansion of HMQC spectrum of stephapierrine B (2) in CDCl <sub>3</sub> (2)                        | 24   |
| <b>S30.</b> | HMBC spectrum of stephapierrine B (2) in CDCl <sub>3</sub>                                         | 24   |
| <b>S31.</b> | Expansion of HMBC spectrum of stephapierrine B (2) in CDCl <sub>3</sub> (1)                        | 25   |

| <b>Figure</b> | <b>Contents</b>                                                                                    | <b>Page</b> |
|---------------|----------------------------------------------------------------------------------------------------|-------------|
| S32.          | Expansion of HMBC spectrum of stephapierrine B (2) in CDCl <sub>3</sub> (2)                        | 25          |
| S33.          | Expansion of HMBC spectrum of stephapierrine B (2) in CDCl <sub>3</sub> (3)                        | 26          |
| S34.          | NOESY spectrum of stephapierrine B (2) in CDCl <sub>3</sub>                                        | 26          |
| S35.          | Expansion of NOESY spectrum of stephapierrine B (2) in CDCl <sub>3</sub> (1)                       | 27          |
| S36.          | Expansion of NOESY spectrum of stephapierrine B (2) in CDCl <sub>3</sub> (2)                       | 27          |
| S37.          | ESI-TOF-MS of stephapierrine B (2)                                                                 | 28          |
| S38.          | IR spectrum of stephapierrine B (2)                                                                | 28          |
| S39.          | <sup>1</sup> H NMR spectrum (CDCl <sub>3</sub> , 400 MHz) of stephapierrine C (3)                  | 29          |
| S40.          | Expansion of <sup>1</sup> H NMR spectrum (CDCl <sub>3</sub> , 400 MHz) of stephapierrine C (3) (1) | 29          |
| S41.          | Expansion of <sup>1</sup> H NMR spectrum (CDCl <sub>3</sub> , 400 MHz) of stephapierrine C (3) (2) | 30          |
| S42.          | <sup>13</sup> C NMR spectrum (CDCl <sub>3</sub> , 100 MHz) of stephapierrine C (3)                 | 30          |
| S43.          | DEPT135 spectrum (CDCl <sub>3</sub> , 100 MHz) of stephapierrine C (3)                             | 31          |
| S44.          | COSY spectrum of stephapierrine C (3) in CDCl <sub>3</sub>                                         | 31          |
| S45.          | Expansion of COSY spectrum of stephapierrine C (3) in CDCl <sub>3</sub>                            | 32          |
| S46.          | HMQC spectrum of stephapierrine C (3) in CDCl <sub>3</sub>                                         | 32          |
| S47.          | Expansion of HMQC spectrum of stephapierrine C (3) in CDCl <sub>3</sub> (1)                        | 33          |
| S48.          | Expansion of HMQC spectrum of stephapierrine C (3) in CDCl <sub>3</sub> (2)                        | 33          |
| S49.          | HMBC spectrum of stephapierrine C (3) in CDCl <sub>3</sub>                                         | 34          |
| S50.          | Expansion of HMBC spectrum of stephapierrine C (3) in CDCl <sub>3</sub> (1)                        | 34          |
| S51.          | Expansion of HMBC spectrum of stephapierrine C (3) in CDCl <sub>3</sub> (2)                        | 35          |
| S52.          | NOESY spectrum of stephapierrine C (3) in CDCl <sub>3</sub>                                        | 35          |
| S53.          | Expansion of NOESY spectrum of stephapierrine C (3) in CDCl <sub>3</sub> (1)                       | 36          |
| S54.          | Expansion of NOESY spectrum of stephapierrine C (3) in CDCl <sub>3</sub> (2)                       | 36          |
| S55.          | ESI-TOF-MS of stephapierrine C (3)                                                                 | 37          |
| S56.          | IR spectrum of stephapierrine C (3)                                                                | 37          |
| S57.          | <sup>1</sup> H NMR spectrum (CD <sub>3</sub> OD, 400 MHz) of stephapierrine D (4)                  | 38          |
| S58.          | Expansion of <sup>1</sup> H NMR spectrum (CD <sub>3</sub> OD, 400 MHz) of stephapierrine D (4) (1) | 38          |
| S59.          | Expansion of <sup>1</sup> H NMR spectrum (CD <sub>3</sub> OD, 400 MHz) of stephapierrine D (4) (2) | 39          |
| S60.          | Expansion of <sup>1</sup> H NMR spectrum (CD <sub>3</sub> OD, 400 MHz) of stephapierrine D (4) (3) | 39          |
| S61.          | <sup>13</sup> C NMR spectrum (CD <sub>3</sub> OD, 100 MHz) of stephapierrine D (4)                 | 40          |
| S62.          | DEPT135 spectrum (CD <sub>3</sub> OD, 100 MHz) of stephapierrine D (4)                             | 40          |
| S63.          | COSY spectrum of stephapierrine D (4) in CD <sub>3</sub> OD                                        | 41          |
| S64.          | Expansion of COSY spectrum of stephapierrine D (4) in CD <sub>3</sub> OD                           | 41          |

| <b>Figure</b> | <b>Contents</b>                                                                                    | <b>Page</b> |
|---------------|----------------------------------------------------------------------------------------------------|-------------|
| <b>S65.</b>   | Expansion of COSY spectrum of stephapierrine D (4) in CD <sub>3</sub> OD                           | 42          |
| <b>S66.</b>   | HMQC spectrum of stephapierrine D (4) in CD <sub>3</sub> OD                                        | 42          |
| <b>S67.</b>   | Expansion of HMQC spectrum of stephapierrine D (4) in CD <sub>3</sub> OD (1)                       | 43          |
| <b>S68.</b>   | Expansion of HMQC spectrum of stephapierrine D (4) in CD <sub>3</sub> OD (2)                       | 43          |
| <b>S69.</b>   | HMBC spectrum of stephapierrine D (4) in CD <sub>3</sub> OD                                        | 44          |
| <b>S70.</b>   | Expansion of HMBC spectrum of stephapierrine D (4) in CD <sub>3</sub> OD (1)                       | 44          |
| <b>S71.</b>   | Expansion of HMBC spectrum of stephapierrine D (4) in CD <sub>3</sub> OD (2)                       | 45          |
| <b>S72.</b>   | Expansion of HMBC spectrum of stephapierrine D (4) in CD <sub>3</sub> OD (3)                       | 45          |
| <b>S73.</b>   | Expansion of HMBC spectrum of stephapierrine D (4) in CD <sub>3</sub> OD (4)                       | 46          |
| <b>S74.</b>   | NOESY spectrum of stephapierrine D (4) in CD <sub>3</sub> OD                                       | 46          |
| <b>S75.</b>   | Expansion of NOESY spectrum of stephapierrine D (4) in CD <sub>3</sub> OD (1)                      | 47          |
| <b>S76.</b>   | Expansion of NOESY spectrum of stephapierrine D (4) in CD <sub>3</sub> OD (2)                      | 47          |
| <b>S77.</b>   | ESI-TOF-MS of stephapierrine D (4)                                                                 | 48          |
| <b>S78.</b>   | IR spectrum of stephapierrine D (4)                                                                | 48          |
| <b>S79.</b>   | <sup>1</sup> H NMR spectrum (CD <sub>3</sub> OD, 400 MHz) of stephapierrine E (5)                  | 49          |
| <b>S80.</b>   | Expansion of <sup>1</sup> H NMR spectrum (CD <sub>3</sub> OD, 400 MHz) of stephapierrine E (5) (1) | 49          |
| <b>S81.</b>   | Expansion of <sup>1</sup> H NMR spectrum (CD <sub>3</sub> OD, 400 MHz) of stephapierrine E (5) (2) | 50          |
| <b>S82.</b>   | <sup>13</sup> C NMR spectrum (CD <sub>3</sub> OD, 100 MHz) of stephapierrine E (5)                 | 50          |
| <b>S83.</b>   | DEPT135 spectrum (CD <sub>3</sub> OD, 100 MHz) of stephapierrine E (5)                             | 51          |
| <b>S84.</b>   | COSY spectrum of stephapierrine E (5) in CD <sub>3</sub> OD                                        | 51          |
| <b>S85.</b>   | Expansion of COSY spectrum of stephapierrine E (5) in CD <sub>3</sub> OD (1)                       | 52          |
| <b>S86.</b>   | Expansion of COSY spectrum of stephapierrine E (5) in CD <sub>3</sub> OD (2)                       | 52          |
| <b>S87.</b>   | HMQC spectrum of stephapierrine E (5) in CD <sub>3</sub> OD                                        | 53          |
| <b>S88.</b>   | Expansion of HMQC spectrum of stephapierrine E (5) in CD <sub>3</sub> OD (1)                       | 53          |
| <b>S89.</b>   | Expansion of HMQC spectrum of stephapierrine E (5) in CD <sub>3</sub> OD (2)                       | 54          |
| <b>S90.</b>   | HMBC spectrum of stephapierrine E (5) in CD <sub>3</sub> OD                                        | 54          |
| <b>S91.</b>   | Expansion of HMBC spectrum of stephapierrine E (5) in CD <sub>3</sub> OD (1)                       | 55          |
| <b>S92.</b>   | Expansion of HMBC spectrum of stephapierrine E (5) in CD <sub>3</sub> OD (2)                       | 55          |
| <b>S93.</b>   | Expansion of HMBC spectrum of stephapierrine E (5) in CD <sub>3</sub> OD (3)                       | 56          |
| <b>S94.</b>   | NOESY spectrum of stephapierrine E (5) in CD <sub>3</sub> OD                                       | 56          |
| <b>S95.</b>   | Expansion of NOESY spectrum of stephapierrine E (5) in CD <sub>3</sub> OD                          | 57          |
| <b>S96.</b>   | ESI-TOF-MS of stephapierrine E (5)                                                                 | 57          |
| <b>S97.</b>   | IR spectrum of stephapierrine E (5)                                                                | 58          |

| Figure | Contents                                                                                           | Page |
|--------|----------------------------------------------------------------------------------------------------|------|
| S98.   | <sup>1</sup> H NMR spectrum (CD <sub>3</sub> OD, 400 MHz) of stephapierrine F (6)                  | 58   |
| S99.   | Expansion of <sup>1</sup> H NMR spectrum (CD <sub>3</sub> OD, 400 MHz) of stephapierrine F (6) (1) | 59   |
| S100.  | Expansion of <sup>1</sup> H NMR spectrum (CD <sub>3</sub> OD, 400 MHz) of stephapierrine F (6) (2) | 59   |
| S101.  | Expansion of <sup>1</sup> H NMR spectrum (CD <sub>3</sub> OD, 400 MHz) of stephapierrine F (6) (3) | 60   |
| S102.  | <sup>13</sup> C NMR spectrum (CD <sub>3</sub> OD, 100 MHz) of stephapierrine F (6)                 | 60   |
| S103.  | DEPT135 spectrum (CD <sub>3</sub> OD, 100 MHz) of stephapierrine F (6)                             | 61   |
| S104.  | COSY spectrum of stephapierrine F (6) in CD <sub>3</sub> OD                                        | 61   |
| S105.  | Expansion of COSY spectrum of stephapierrine F (6) in CD <sub>3</sub> OD (1)                       | 62   |
| S106.  | Expansion of COSY spectrum of stephapierrine F (6) in CD <sub>3</sub> OD (2)                       | 62   |
| S107.  | HMQC spectrum of stephapierrine F (6) in CD <sub>3</sub> OD                                        | 63   |
| S108.  | Expansion of HMQC spectrum of stephapierrine F (6) in CD <sub>3</sub> OD (1)                       | 63   |
| S109.  | Expansion of HMQC spectrum of stephapierrine F (6) in CD <sub>3</sub> OD (2)                       | 64   |
| S110.  | HMBC spectrum of stephapierrine F (6) in CD <sub>3</sub> OD                                        | 64   |
| S111.  | Expansion of HMBC spectrum of stephapierrine F (6) in CD <sub>3</sub> OD (1)                       | 65   |
| S112.  | Expansion of HMBC spectrum of stephapierrine F (6) in CD <sub>3</sub> OD (2)                       | 65   |
| S113.  | Expansion of HMBC spectrum of stephapierrine F (6) in CD <sub>3</sub> OD (3)                       | 66   |
| S114.  | Expansion of HMBC spectrum of stephapierrine F (6) in CD <sub>3</sub> OD (4)                       | 66   |
| S115.  | NOESY spectrum of stephapierrine F (6) in CD <sub>3</sub> OD                                       | 67   |
| S116.  | Expansion of NOESY spectrum of stephapierrine F (6) in CD <sub>3</sub> OD (1)                      | 67   |
| S117.  | Expansion of NOESY spectrum of stephapierrine F (6) in CD <sub>3</sub> OD (2)                      | 68   |
| S118.  | ESI-TOF-MS of stephapierrine F (6)                                                                 | 68   |
| S119.  | IR spectrum of stephapierrine F (6)                                                                | 69   |
| S120.  | <sup>1</sup> H NMR spectrum (CD <sub>3</sub> OD, 400 MHz) of stephapierrine G (7)                  | 69   |
| S121.  | Expansion of <sup>1</sup> H NMR spectrum (CD <sub>3</sub> OD, 400 MHz) of stephapierrine G (7) (1) | 70   |
| S122.  | Expansion of <sup>1</sup> H NMR spectrum (CD <sub>3</sub> OD, 400 MHz) of stephapierrine G (7) (2) | 70   |
| S123.  | <sup>13</sup> C NMR spectrum (CD <sub>3</sub> OD, 100 MHz) of stephapierrine G (7)                 | 71   |
| S124.  | DEPT135 spectrum (CD <sub>3</sub> OD, 100 MHz) of stephapierrine G (7)                             | 71   |
| S125.  | COSY spectrum of stephapierrine G (7) in CD <sub>3</sub> OD                                        | 72   |
| S126.  | HMQC spectrum of stephapierrine G (7) in CD <sub>3</sub> OD                                        | 72   |
| S127.  | HMBC spectrum of stephapierrine G (7) in CD <sub>3</sub> OD                                        | 73   |
| S128.  | Expansion of HMBC spectrum of stephapierrine G (7) in CD <sub>3</sub> OD                           | 73   |
| S129.  | NOESY spectrum of stephapierrine G (7) in CD <sub>3</sub> OD                                       | 74   |
| S130.  | ESI-TOF-MS of stephapierrine G (7)                                                                 | 74   |

| Figure | Contents                                                                                                       | Page |
|--------|----------------------------------------------------------------------------------------------------------------|------|
| S131.  | IR spectrum of stephapierrine G (7)                                                                            | 75   |
| S132.  | <sup>1</sup> H NMR spectrum (CDCl <sub>3</sub> , 400 MHz) of stephapierrine H (8)                              | 75   |
| S133.  | Expansion of <sup>1</sup> H NMR spectrum (CDCl <sub>3</sub> , 400 MHz) of stephapierrine H (8) (1)             | 76   |
| S134.  | Expansion of <sup>1</sup> H NMR spectrum (CDCl <sub>3</sub> , 400 MHz) of stephapierrine H (8) (2)             | 76   |
| S135.  | <sup>13</sup> C NMR spectrum (CDCl <sub>3</sub> , 100 MHz) of stephapierrine H (8)                             | 77   |
| S136.  | DEPT135 spectrum (CDCl <sub>3</sub> , 100 MHz) of stephapierrine H (8)                                         | 77   |
| S137.  | COSY spectrum of stephapierrine H (8) in CDCl <sub>3</sub>                                                     | 78   |
| S138.  | HMQC spectrum of stephapierrine H (8) in CDCl <sub>3</sub>                                                     | 78   |
| S139.  | Expansion of HMQC spectrum of stephapierrine H (8) in CDCl <sub>3</sub>                                        | 79   |
| S140.  | HMBC spectrum of stephapierrine H (8) in CDCl <sub>3</sub>                                                     | 79   |
| S141.  | Expansion of HMBC spectrum of stephapierrine H (8) in CDCl <sub>3</sub>                                        | 80   |
| S142.  | NOESY spectrum of stephapierrine H (8) in CDCl <sub>3</sub>                                                    | 80   |
| S143.  | ESI-TOF-MS of stephapierrine H (8)                                                                             | 81   |
| S144.  | IR spectrum of stephapierrine H (8)                                                                            | 81   |
| S145.  | <sup>1</sup> H NMR spectrum (CD <sub>3</sub> OD, 400 MHz) of <i>O,N</i> -diacetylasimilobine (9)               | 82   |
| S146.  | <sup>13</sup> C NMR spectrum (CD <sub>3</sub> OD, 100 MHz) of <i>O,N</i> -diacetylasimilobine (9)              | 82   |
| S147.  | DEPT135 spectrum (CD <sub>3</sub> OD, 100 MHz) of <i>O,N</i> -diacetylasimilobine (9)                          | 83   |
| S148.  | COSY spectrum of <i>O,N</i> -diacetylasimilobine (9) in CD <sub>3</sub> OD                                     | 83   |
| S149.  | HMQC spectrum of <i>O,N</i> -diacetylasimilobine (9) in CD <sub>3</sub> OD                                     | 84   |
| S150.  | HMBC spectrum of <i>O,N</i> -diacetylasimilobine (9) in CD <sub>3</sub> OD                                     | 84   |
| S151.  | NOESY spectrum of <i>O,N</i> -diacetylasimilobine (9) in CD <sub>3</sub> OD                                    | 85   |
| S152.  | <sup>1</sup> H NMR spectrum (CDCl <sub>3</sub> , 400 MHz) of <i>N</i> -acetamideseccrebanine (10)              | 85   |
| S153.  | <sup>13</sup> C NMR spectrum (CDCl <sub>3</sub> , 100 MHz) of <i>N</i> -acetamideseccrebanine (10)             | 86   |
| S154.  | DEPT135 spectrum (CDCl <sub>3</sub> , 100 MHz) of <i>N</i> -acetamideseccrebanine (10)                         | 86   |
| S155.  | COSY spectrum of <i>N</i> -acetamideseccrebanine (10) in CDCl <sub>3</sub>                                     | 87   |
| S156.  | HMQC spectrum of <i>N</i> -acetamideseccrebanine (10) in CDCl <sub>3</sub>                                     | 87   |
| S157.  | HMBC spectrum of <i>N</i> -acetamideseccrebanine (10) in CDCl <sub>3</sub>                                     | 88   |
| S158.  | NOESY spectrum of <i>N</i> -acetamideseccrebanine (10) in CDCl <sub>3</sub>                                    | 88   |
| S159.  | <sup>1</sup> H NMR spectrum (DMSO- <i>d</i> <sub>6</sub> , 400 MHz) of 2,3-didemethyltetrahydropalmatine (11)  | 89   |
| S160.  | <sup>13</sup> C NMR spectrum (DMSO- <i>d</i> <sub>6</sub> , 100 MHz) of 2,3-didemethyltetrahydropalmatine (11) | 89   |
| S161.  | DEPT135 spectrum (DMSO- <i>d</i> <sub>6</sub> , 100 MHz) of 2,3-didemethyltetrahydropalmatine (11)             | 90   |
| S162.  | COSY spectrum of 2,3-didemethyltetrahydropalmatine (11) in DMSO- <i>d</i> <sub>6</sub>                         | 90   |
| S163.  | HMQC spectrum of 2,3-didemethyltetrahydropalmatine (11) in DMSO- <i>d</i> <sub>6</sub>                         | 91   |

| Figure | Contents                                                                                                                                    | Page |
|--------|---------------------------------------------------------------------------------------------------------------------------------------------|------|
| S164.  | HMBC spectrum of 2,3-didemethyltetrahydropalmatine ( <b>11</b> ) in DMSO- <i>d</i> <sub>6</sub>                                             | 91   |
| S165.  | NOESY spectrum of 2,3-didemethyltetrahydropalmatine ( <b>11</b> ) in DMSO- <i>d</i> <sub>6</sub>                                            | 92   |
| S166.  | <sup>1</sup> H NMR spectrum (CD <sub>3</sub> OD, 400 MHz) of stepholidine ( <b>12</b> )                                                     | 92   |
| S167.  | <sup>13</sup> C NMR spectrum (CD <sub>3</sub> OD, 100 MHz) of stepholidine ( <b>12</b> )                                                    | 93   |
| S168.  | <sup>1</sup> H NMR spectrum (CD <sub>3</sub> OD, 400 MHz) of discretamine ( <b>13</b> )                                                     | 93   |
| S169.  | <sup>13</sup> C NMR spectrum (CD <sub>3</sub> OD, 100 MHz) of discretamine ( <b>13</b> )                                                    | 94   |
| S170.  | <sup>1</sup> H NMR spectrum (CDCl <sub>3</sub> , 400 MHz) of tetrahydropalmatine ( <b>14</b> )                                              | 94   |
| S171.  | <sup>13</sup> C NMR spectrum (CDCl <sub>3</sub> , 100 MHz) of tetrahydropalmatine ( <b>14</b> )                                             | 95   |
| S172.  | <sup>1</sup> H NMR spectrum (CD <sub>3</sub> OD, 400 MHz) of <i>N</i> -methylstepholidine ( <b>15</b> )                                     | 95   |
| S173.  | <sup>13</sup> C NMR spectrum (CD <sub>3</sub> OD, 100 MHz) of <i>N</i> -methylstepholidine ( <b>15</b> )                                    | 96   |
| S174.  | <sup>1</sup> H NMR spectrum (CD <sub>3</sub> OD, 400 MHz) of cyclanoline ( <b>16</b> )                                                      | 96   |
| S175.  | <sup>13</sup> C NMR spectrum (CD <sub>3</sub> OD, 100 MHz) of cyclanoline ( <b>16</b> )                                                     | 97   |
| S176.  | <sup>1</sup> H NMR spectrum (CDCl <sub>3</sub> + 5 drops CD <sub>3</sub> OD, 400 MHz) of <i>N</i> -methyltetrahydropalmatine ( <b>17</b> )  | 97   |
| S177.  | <sup>13</sup> C NMR spectrum (CDCl <sub>3</sub> + 5 drops CD <sub>3</sub> OD, 100 MHz) of <i>N</i> -methyltetrahydropalmatine ( <b>17</b> ) | 98   |
| S178.  | <sup>1</sup> H NMR spectrum (CD <sub>3</sub> OD, 400 MHz) of jatrorrhizine ( <b>18</b> )                                                    | 98   |
| S179.  | <sup>13</sup> C NMR spectrum (CD <sub>3</sub> OD, 100 MHz) of jatrorrhizine ( <b>18</b> )                                                   | 99   |
| S180.  | <sup>1</sup> H NMR spectrum (DMSO- <i>d</i> <sub>6</sub> , 400 MHz) of palmatine ( <b>19</b> )                                              | 99   |
| S181.  | <sup>13</sup> C NMR spectrum (DMSO- <i>d</i> <sub>6</sub> , 100 MHz) of palmatine ( <b>19</b> )                                             | 100  |
| S182.  | <sup>1</sup> H NMR spectrum (CDCl <sub>3</sub> , 400 MHz) of dehydrocorydaline ( <b>20</b> )                                                | 100  |
| S183.  | <sup>13</sup> C NMR spectrum (CDCl <sub>3</sub> , 100 MHz) of dehydrocorydaline ( <b>20</b> )                                               | 101  |
| S184.  | <sup>1</sup> H NMR spectrum (CD <sub>3</sub> OD, 400 MHz) of pseudodehydrocorydaline ( <b>21</b> )                                          | 101  |
| S185.  | <sup>13</sup> C NMR spectrum (CD <sub>3</sub> OD, 100 MHz) of pseudodehydrocorydaline ( <b>21</b> )                                         | 102  |
| S186.  | <sup>1</sup> H NMR spectrum (CDCl <sub>3</sub> , 400 MHz) of roemerine ( <b>22</b> )                                                        | 102  |
| S187.  | <sup>13</sup> C NMR spectrum (CDCl <sub>3</sub> , 100 MHz) of roemerine ( <b>22</b> )                                                       | 103  |
| S188.  | <sup>1</sup> H NMR spectrum (CDCl <sub>3</sub> , 400 MHz) of (–)-stephanine ( <b>23</b> )                                                   | 103  |
| S189.  | <sup>13</sup> C NMR spectrum (CDCl <sub>3</sub> , 100 MHz) of (–)-stephanine ( <b>23</b> )                                                  | 104  |
| S190.  | <sup>1</sup> H NMR spectrum (CDCl <sub>3</sub> , 400 MHz) of (–)-isolaureline ( <b>24</b> )                                                 | 104  |
| S191.  | <sup>13</sup> C NMR spectrum (CDCl <sub>3</sub> , 100 MHz) of (–)-isolaureline ( <b>24</b> )                                                | 105  |
| S192.  | <sup>1</sup> H NMR spectrum (CDCl <sub>3</sub> , 400 MHz) of crebanine ( <b>25</b> )                                                        | 105  |
| S193.  | <sup>13</sup> C NMR spectrum (CDCl <sub>3</sub> , 100 MHz) of crebanine ( <b>25</b> )                                                       | 106  |
| S194.  | <sup>1</sup> H NMR spectrum (CDCl <sub>3</sub> + 5 drops CD <sub>3</sub> OD, 400 MHz) of dicentrine ( <b>26</b> )                           | 106  |

| Figure | Contents                                                                                                      | Page |
|--------|---------------------------------------------------------------------------------------------------------------|------|
| S195.  | <sup>13</sup> C NMR spectrum (CDCl <sub>3</sub> + 5 drops CD <sub>3</sub> OD, 100 MHz) of dicentrine (26)     | 107  |
| S196.  | <sup>1</sup> H NMR spectrum (CDCl <sub>3</sub> , 400 MHz) of (-)-ushinsunine (27)                             | 107  |
| S197.  | <sup>13</sup> C NMR spectrum (CDCl <sub>3</sub> , 100 MHz) of (-)-ushinsunine (27)                            | 108  |
| S198.  | <sup>1</sup> H NMR spectrum (CD <sub>3</sub> OD, 400 MHz) of (-)-ayuthianine (28)                             | 108  |
| S199.  | <sup>13</sup> C NMR spectrum (CD <sub>3</sub> OD, 100 MHz) of (-)-ayuthianine (28)                            | 109  |
| S200.  | <sup>1</sup> H NMR spectrum (CDCl <sub>3</sub> , 400 MHz) of sukhodianine (29)                                | 109  |
| S201.  | <sup>13</sup> C NMR spectrum (CDCl <sub>3</sub> , 100 MHz) of sukhodianine (29)                               | 110  |
| S202.  | <sup>1</sup> H NMR spectrum (Acetone- <i>d</i> <sub>6</sub> , 400 MHz) of (-)- <i>N</i> -fonnylanonaine (30)  | 110  |
| S203.  | <sup>13</sup> C NMR spectrum (Acetone- <i>d</i> <sub>6</sub> , 100 MHz) of (-)- <i>N</i> -fonnylanonaine (30) | 111  |
| S204.  | <sup>1</sup> H NMR spectrum (CD <sub>3</sub> OD, 400 MHz) of (-)- <i>N</i> -methylassimilobine (31)           | 111  |
| S205.  | <sup>13</sup> C NMR spectrum (CD <sub>3</sub> OD, 100 MHz) of (-)- <i>N</i> -methylassimilobine (31)          | 112  |
| S206.  | <sup>1</sup> H NMR spectrum (CD <sub>3</sub> OD, 400 MHz) of (-)-asimilobine (32)                             | 112  |
| S207.  | <sup>13</sup> C NMR spectrum (CD <sub>3</sub> OD, 100 MHz) of (-)-asimilobine (32)                            | 113  |
| S208.  | <sup>1</sup> H NMR spectrum (CD <sub>3</sub> OD, 400 MHz) of (-)-asimilobine-2- <i>O</i> -β-D-glucoside (33)  | 113  |
| S209.  | <sup>13</sup> C NMR spectrum (CD <sub>3</sub> OD, 100 MHz) of (-)-asimilobine-2- <i>O</i> -β-D-glucoside (33) | 114  |
| S210.  | <sup>1</sup> H NMR spectrum (CDCl <sub>3</sub> , 400 MHz) of lanuginosine (34)                                | 114  |
| S211.  | <sup>13</sup> C NMR spectrum (CDCl <sub>3</sub> , 100 MHz) of lanuginosine (34)                               | 115  |
| S212.  | <sup>1</sup> H NMR spectrum (CDCl <sub>3</sub> + 5 drops CD <sub>3</sub> OD, 400 MHz) of dicentrinone (35)    | 115  |
| S213.  | <sup>13</sup> C NMR spectrum (CDCl <sub>3</sub> + 5 drops CD <sub>3</sub> OD, 100 MHz) of dicentrinone (35)   | 116  |
| S214.  | <sup>1</sup> H NMR spectrum (CDCl <sub>3</sub> , 400 MHz) of oxocrebanine (36)                                | 116  |
| S215.  | <sup>13</sup> C NMR spectrum (CDCl <sub>3</sub> , 100 MHz) of oxocrebanine (36)                               | 117  |
| S216.  | <sup>1</sup> H NMR spectrum (CDCl <sub>3</sub> , 400 MHz) of 8-methoxyuvoriopsine (37)                        | 117  |
| S217.  | <sup>13</sup> C NMR spectrum (CDCl <sub>3</sub> , 100 MHz) of 8-methoxyuvoriopsine (37)                       | 118  |
| S218.  | <sup>1</sup> H NMR spectrum (CDCl <sub>3</sub> , 400 MHz) of dehydrooemerine (38)                             | 118  |
| S219.  | <sup>13</sup> C NMR spectrum (CDCl <sub>3</sub> , 100 MHz) of dehydrooemerine (38)                            | 119  |
| S220.  | <sup>1</sup> H NMR spectrum (CDCl <sub>3</sub> , 400 MHz) of dehydrostephanine (39)                           | 119  |
| S221.  | <sup>13</sup> C NMR spectrum (CDCl <sub>3</sub> , 100 MHz) of dehydrostephanine (39)                          | 120  |
| S222.  | <sup>1</sup> H NMR spectrum (CDCl <sub>3</sub> , 400 MHz) of dehydroisolaureline (40)                         | 120  |
| S223.  | <sup>13</sup> C NMR spectrum (CDCl <sub>3</sub> , 100 MHz) of dehydroisolaureline (40)                        | 121  |
| S224.  | <sup>1</sup> H NMR spectrum (CDCl <sub>3</sub> , 400 MHz) of dehydrocrebanine (41)                            | 121  |
| S225.  | <sup>13</sup> C NMR spectrum (CDCl <sub>3</sub> , 100 MHz) of dehydrocrebanine (41)                           | 122  |
| S226.  | <sup>1</sup> H NMR spectrum (CDCl <sub>3</sub> , 400 MHz) of dehydrodicentrine (42)                           | 122  |
| S227.  | <sup>13</sup> C NMR spectrum (CDCl <sub>3</sub> , 100 MHz) of dehydrodicentrine (42)                          | 123  |



| <b>Figure</b> | <b>Contents</b>                                                                                              | <b>Page</b> |
|---------------|--------------------------------------------------------------------------------------------------------------|-------------|
| <b>S228.</b>  | <sup>1</sup> H NMR spectrum (CDCl <sub>3</sub> , 400 MHz) of (-)-crebanine-β- <i>N</i> -oxide ( <b>43</b> )  | 123         |
| <b>S229.</b>  | <sup>13</sup> C NMR spectrum (CDCl <sub>3</sub> , 100 MHz) of (-)-crebanine-β- <i>N</i> -oxide ( <b>43</b> ) | 124         |
| <b>S230.</b>  | <sup>1</sup> H NMR spectrum (CD <sub>3</sub> OD, 400 MHz) of coclaurine ( <b>44</b> )                        | 124         |
| <b>S231.</b>  | <sup>13</sup> C NMR spectrum (CD <sub>3</sub> OD, 100 MHz) of coclaurine ( <b>44</b> )                       | 125         |
| <b>S232.</b>  | <sup>1</sup> H NMR spectrum (CDCl <sub>3</sub> , 400 MHz) of salutaridine ( <b>45</b> )                      | 125         |
| <b>S233.</b>  | <sup>13</sup> C NMR spectrum (CDCl <sub>3</sub> , 100 MHz) of salutaridine ( <b>45</b> )                     | 126         |
| <b>S234.</b>  | ECD spectra of stephapierrines A-D ( <b>1-4</b> )                                                            | 126         |
| <b>S235.</b>  | ECD spectra of stephapierrines E-F ( <b>5-6</b> ) and <i>O,N</i> -diacetylasimilobine ( <b>9</b> )           | 127         |

### List of Table

| <b>Table</b> | <b>Contents</b>                                             | <b>Page</b> |
|--------------|-------------------------------------------------------------|-------------|
| <b>S1.</b>   | Cholinesterase inhibitory activities of aporphine alkaloids | 128         |

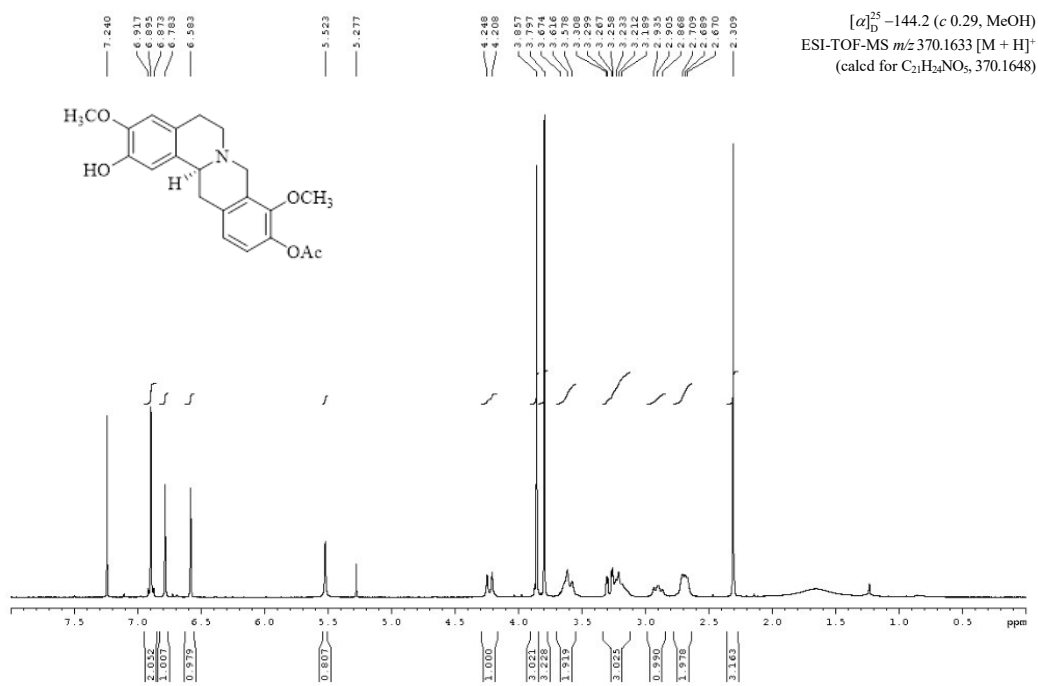

**Figure S1.** <sup>1</sup>H NMR spectrum (CDCl<sub>3</sub>, 400 MHz) of stephapierrine A (1)

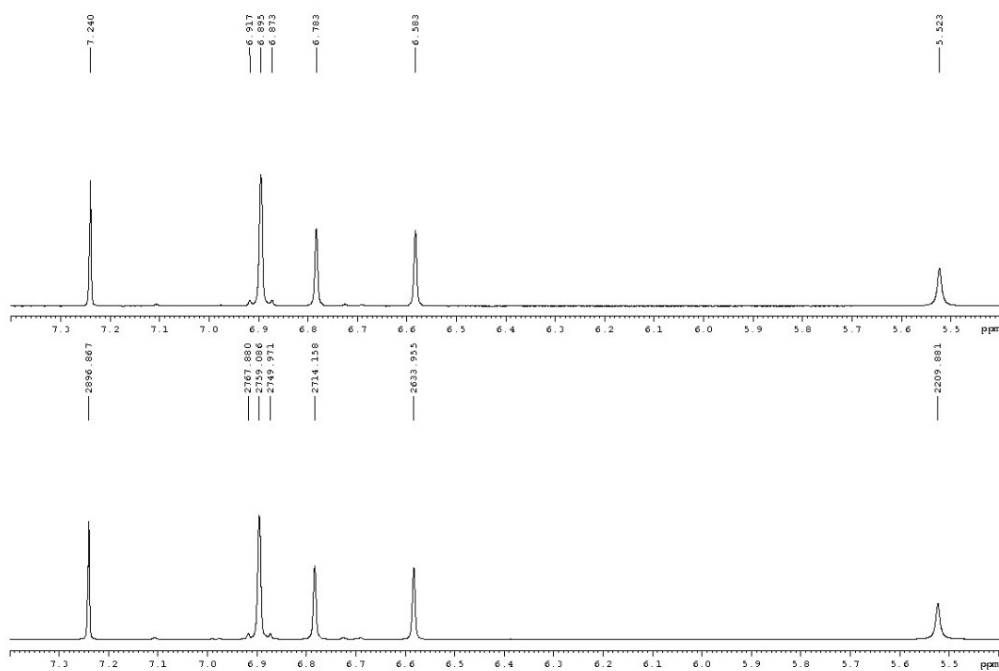

**Figure S2.** Expansion of <sup>1</sup>H NMR spectrum (CDCl<sub>3</sub>, 400 MHz) of stephapierrine A (1) (1)

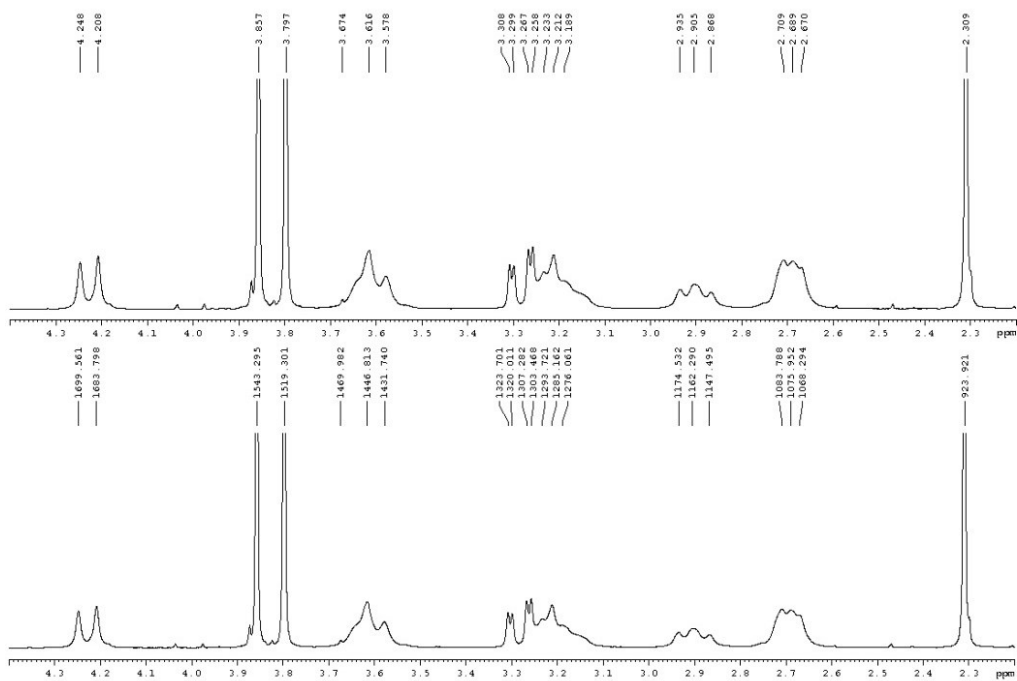

Figure S3. Expansion of  $^1\text{H}$  NMR spectrum ( $\text{CDCl}_3$ , 400 MHz) of stephapierrine A (1) (2)

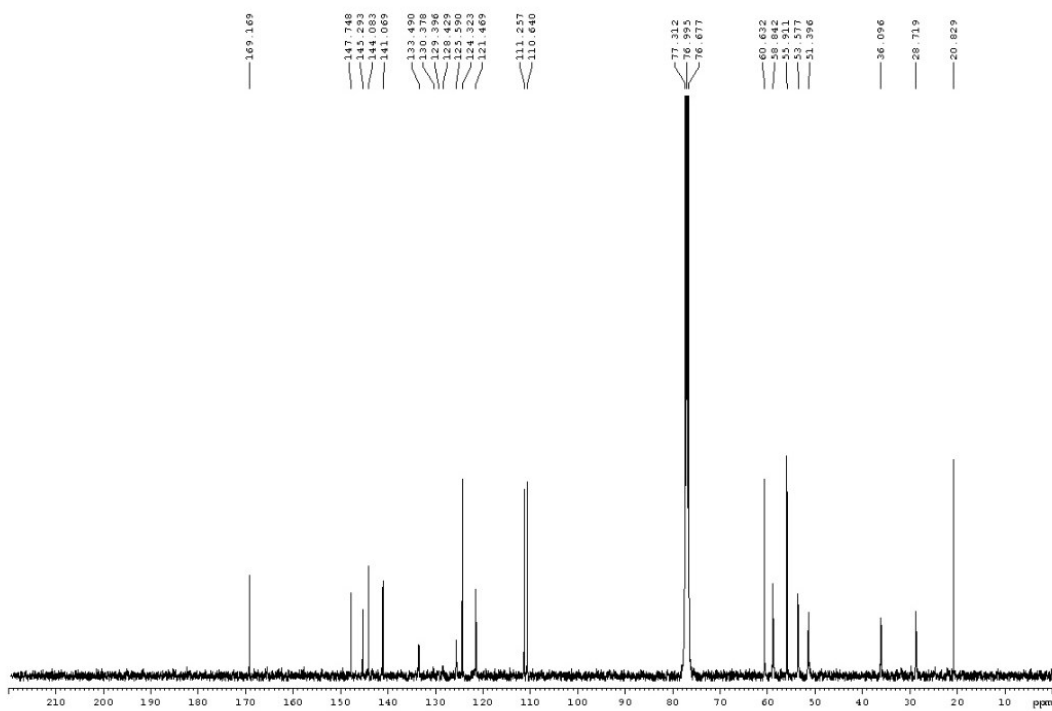

Figure S4.  $^{13}\text{C}$  NMR spectrum ( $\text{CDCl}_3$ , 100 MHz) of stephapierrine A (1)

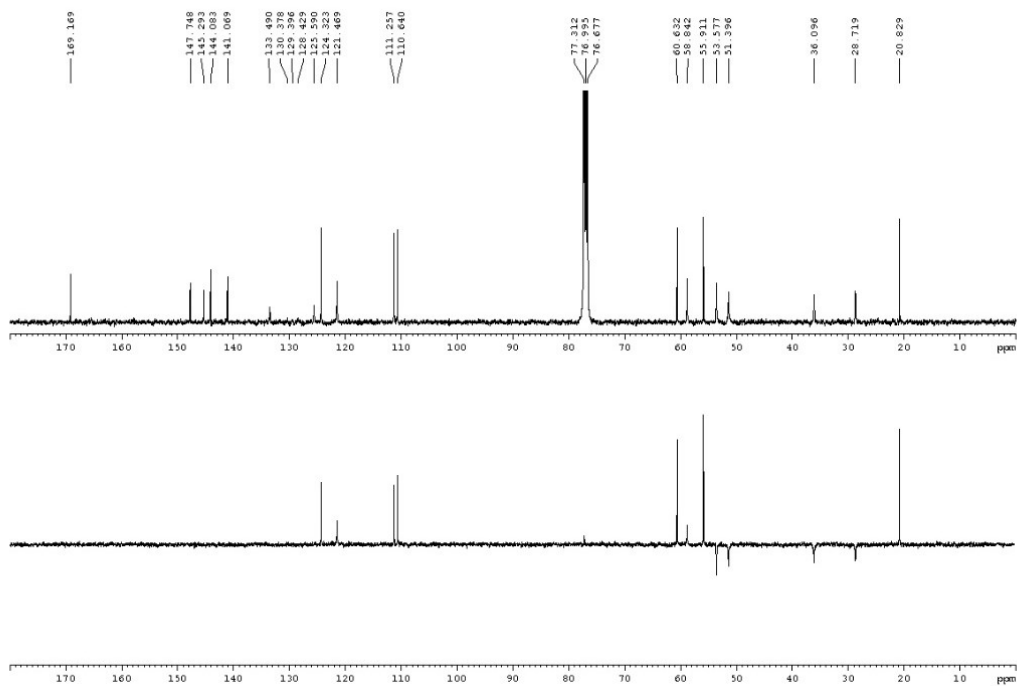

Figure S5. DEPT135 spectrum (CDCl<sub>3</sub>, 100 MHz) of stephapierrine A (1)

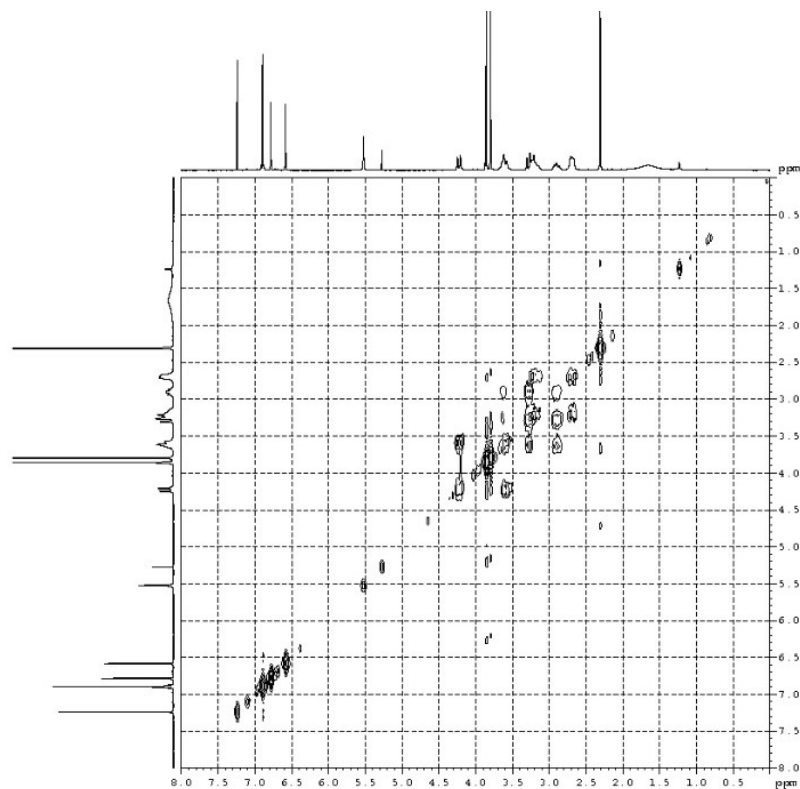

Figure S6. COSY spectrum of stephapierrine A (1) in CDCl<sub>3</sub>

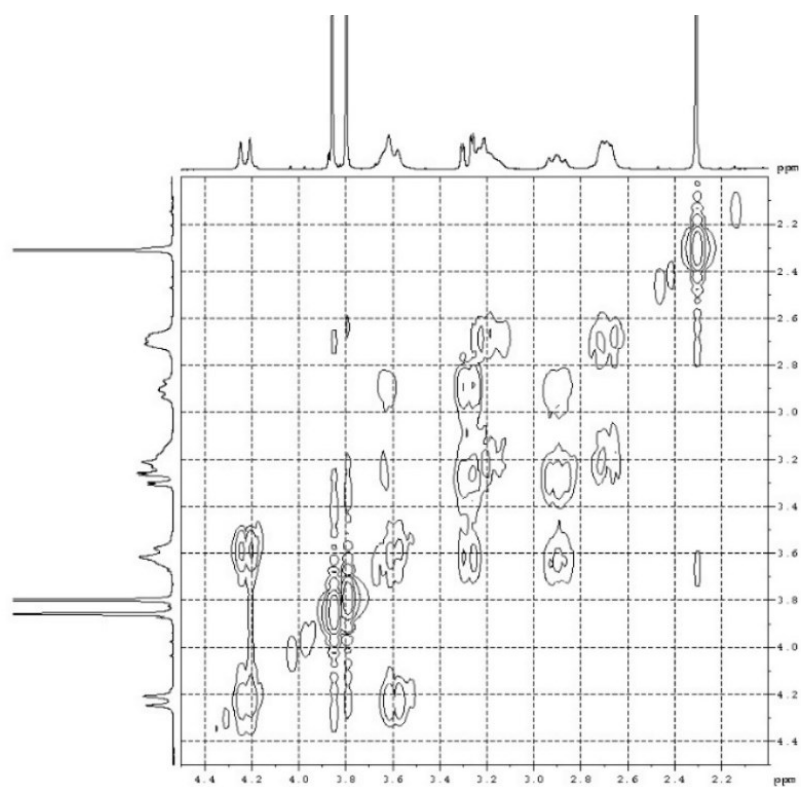

**Figure S7.** Expansion of COSY spectrum of stephapierrine A (**1**) in CDCl<sub>3</sub>

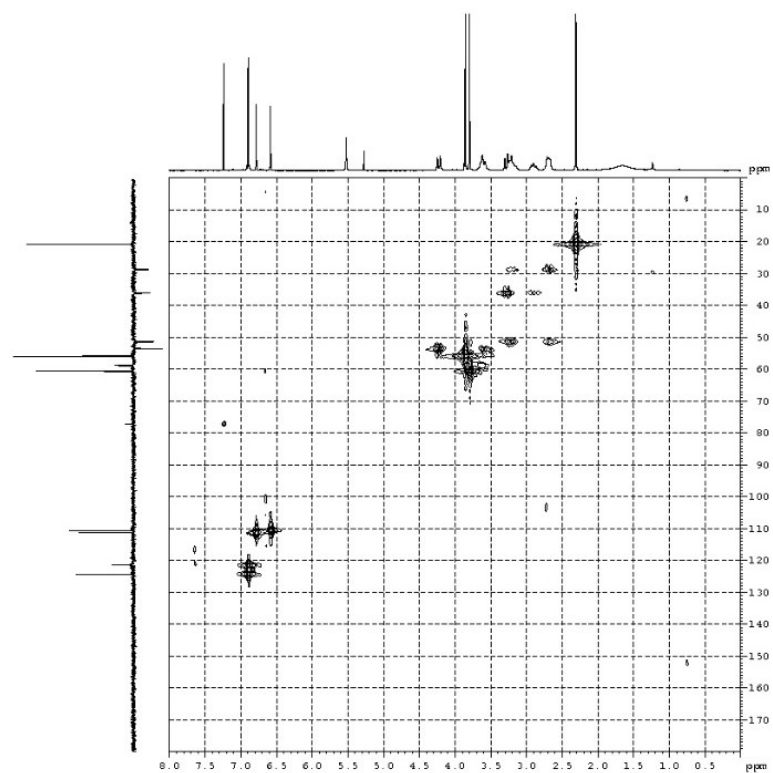

**Figure S8.** HMQC spectrum of stephapierrine A (**1**) in CDCl<sub>3</sub>

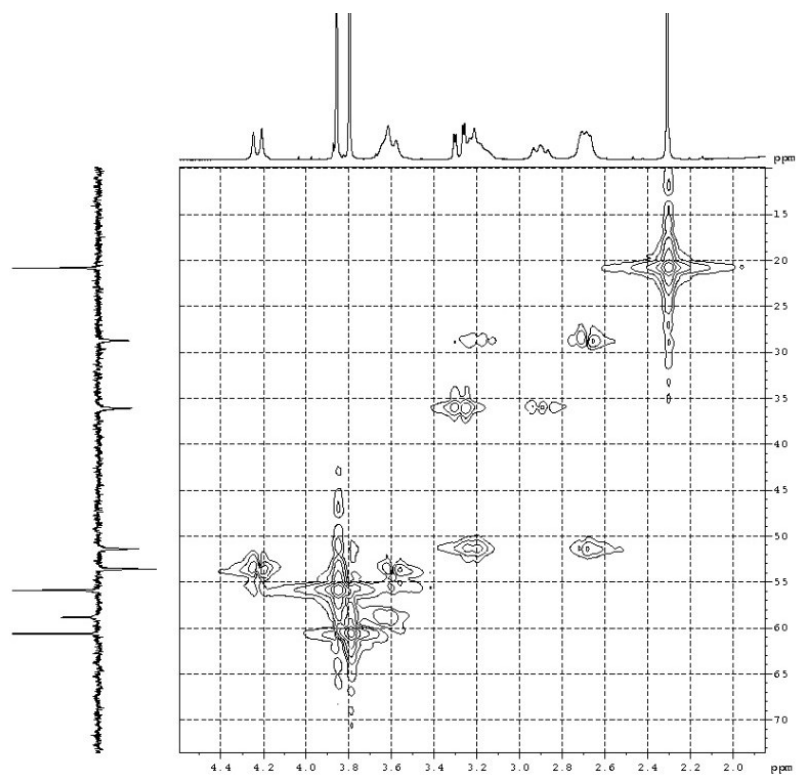

**Figure S9.** Expansion of HMQC spectrum of stephapierrine A (**1**) in CDCl<sub>3</sub> (1)

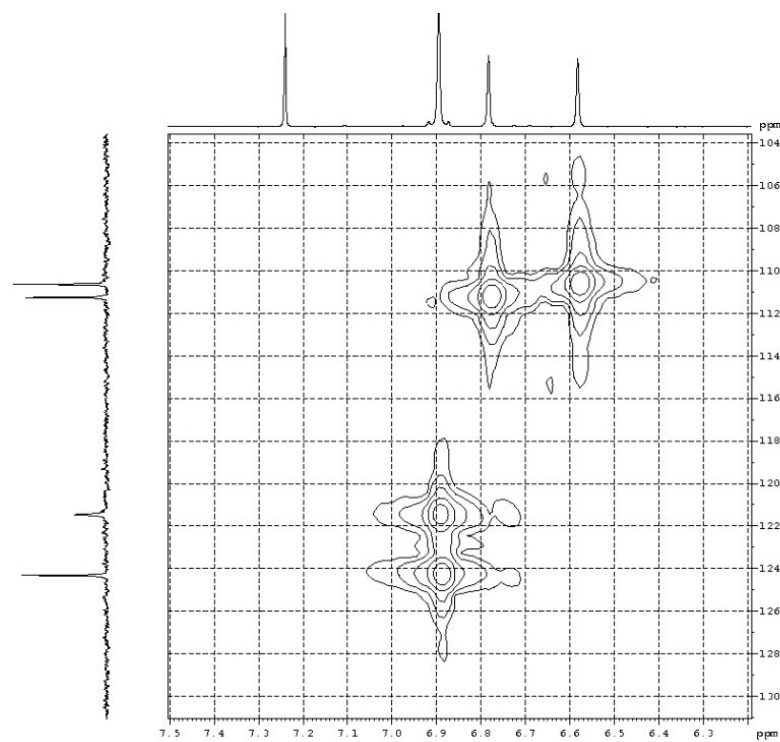

**Figure S10.** Expansion of HMQC spectrum of stephapierrine A (**1**) in CDCl<sub>3</sub> (2)

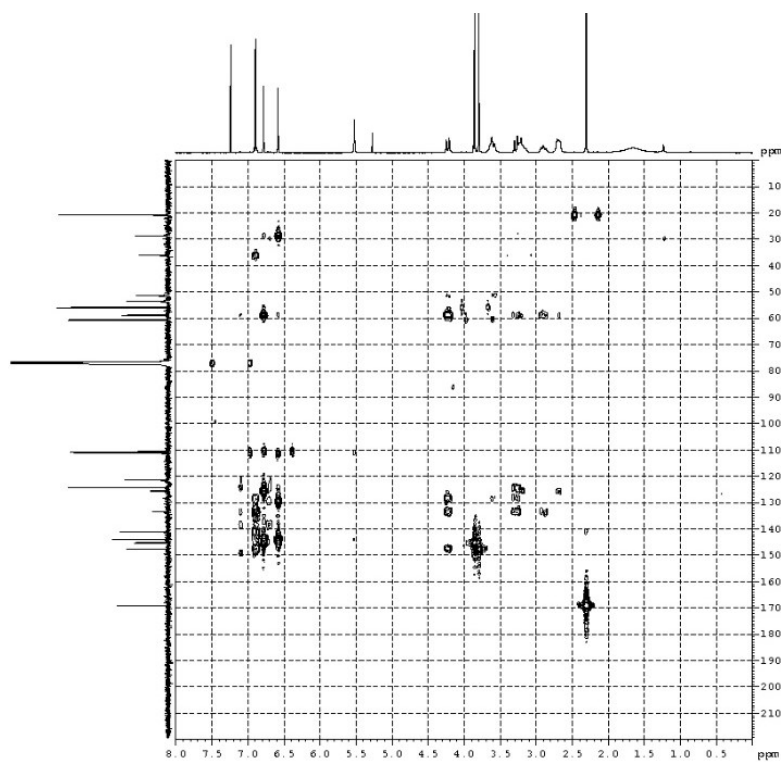

Figure S11. HMBC spectrum of stephapierrine A (**1**) in  $\text{CDCl}_3$

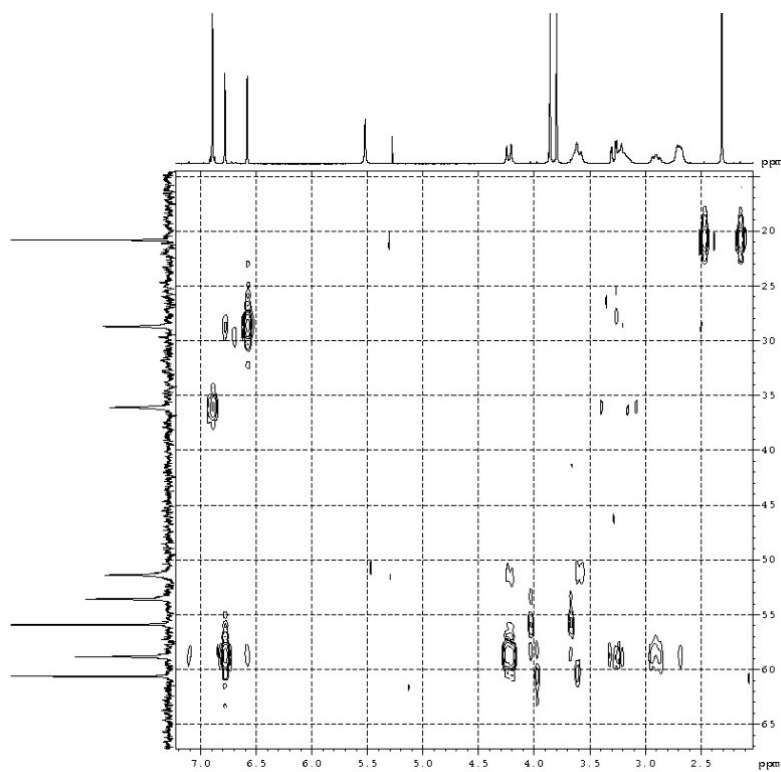

Figure S12. Expansion of HMBC spectrum of stephapierrine A (**1**) in  $\text{CDCl}_3$  (1)

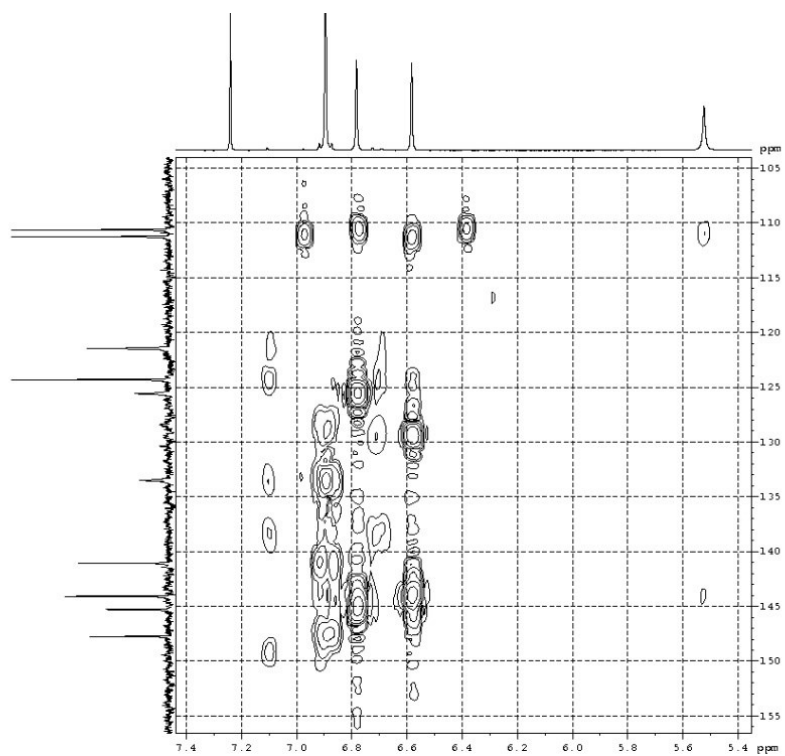

Figure S13. Expansion of HMBC spectrum of stephapierrine A (1) in CDCl<sub>3</sub> (2)

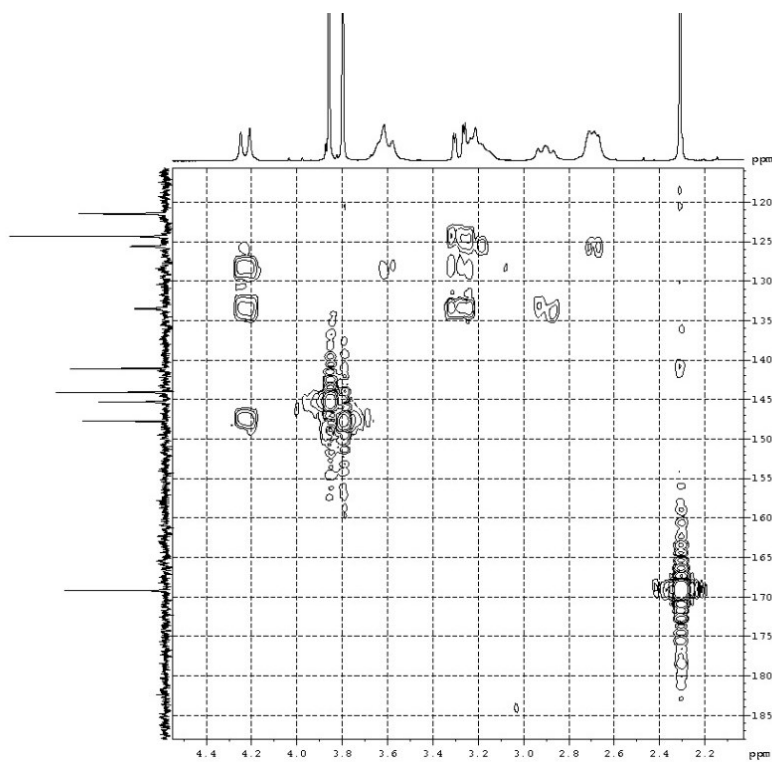

Figure S14. Expansion of HMBC spectrum of stephapierrine A (1) in CDCl<sub>3</sub> (3)



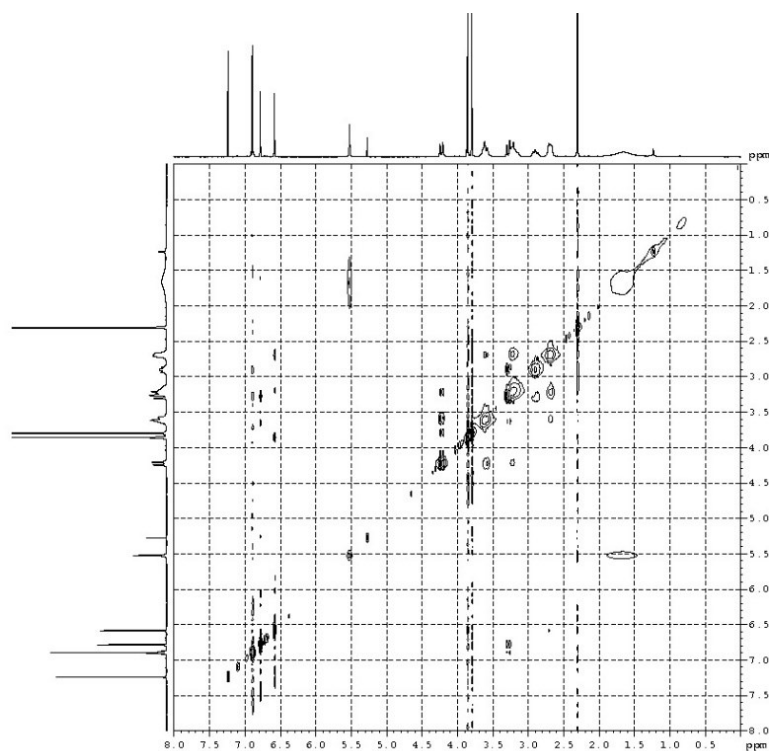

**Figure S15.** NOESY spectrum of stephapierrine A (**1**) in  $\text{CDCl}_3$

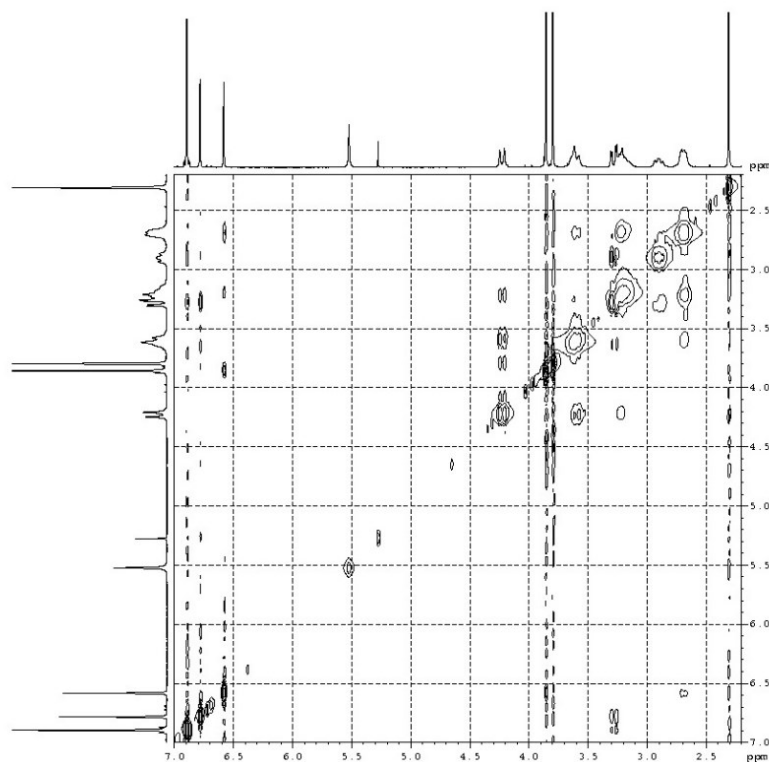

**Figure S16.** Expansion of NOESY spectrum of stephapierrine A (**1**) in  $\text{CDCl}_3$  (1)

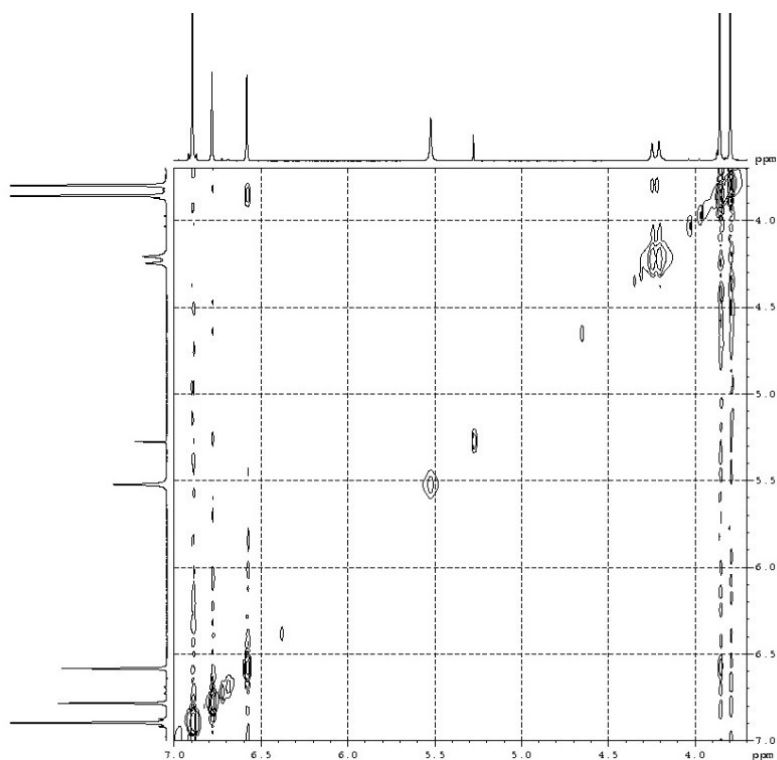

**Figure S17.** Expansion of NOESY spectrum of stephapierrine A (1) in  $\text{CDCl}_3$  (2)

### Mass Spectrum SmartFormula Report

| Analysis Info         |                                           | Acquisition Date 12/7/2020 3:00:01 PM |          |                  |           |
|-----------------------|-------------------------------------------|---------------------------------------|----------|------------------|-----------|
| Analysis Name         | D:\Data\Apichart\ESIVAS-HRMS 1242 (pos).d | Operator                              | RU       |                  |           |
| Method                | tune_wide-RU.m                            | Instrument                            | micrOTOF | 8213750.10411    |           |
| Sample Name           | AS-RU 19497                               | Comment                               |          |                  |           |
| Acquisition Parameter |                                           |                                       |          |                  |           |
| Source Type           | ESI                                       | Ion Polarity                          | Positive | Set Nebulizer    | 0.3 Bar   |
| Focus                 | Not active                                |                                       |          | Set Dry Heater   | 180 °C    |
| Scan Begin            | 100 m/z                                   | Set Capillary                         | 4500 V   | Set Dry Gas      | 4.0 l/min |
| Scan End              | 4000 m/z                                  | Set End Plate Offset                  | -500 V   | Set Divert Valve | Waste     |

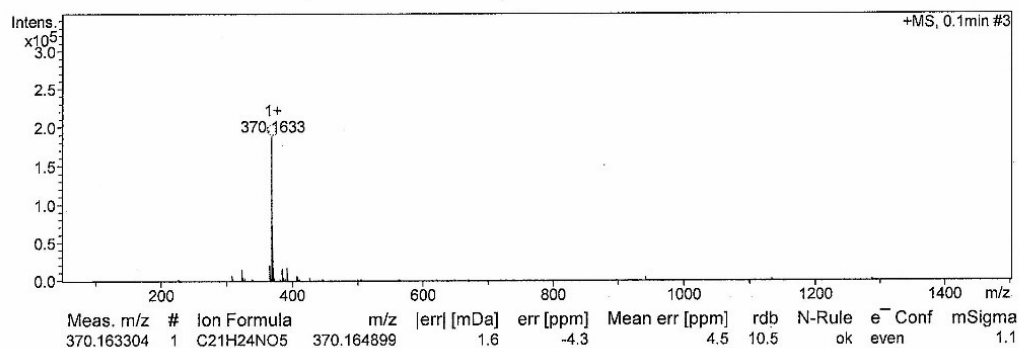

**Figure S18.** ESI-TOF-MS of stephapierrine A (1)

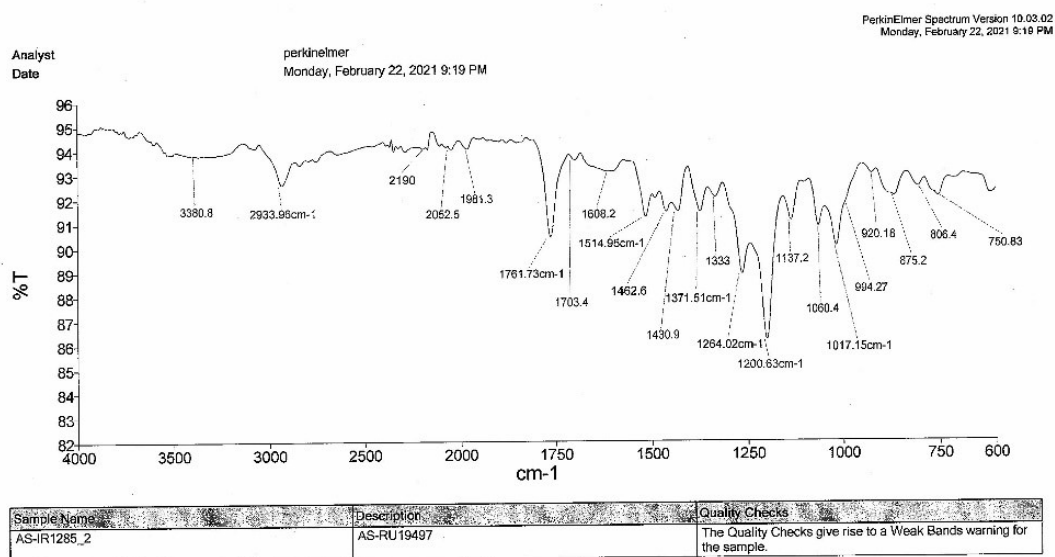

Figure S19. IR spectrum of stephapierrine A (1)

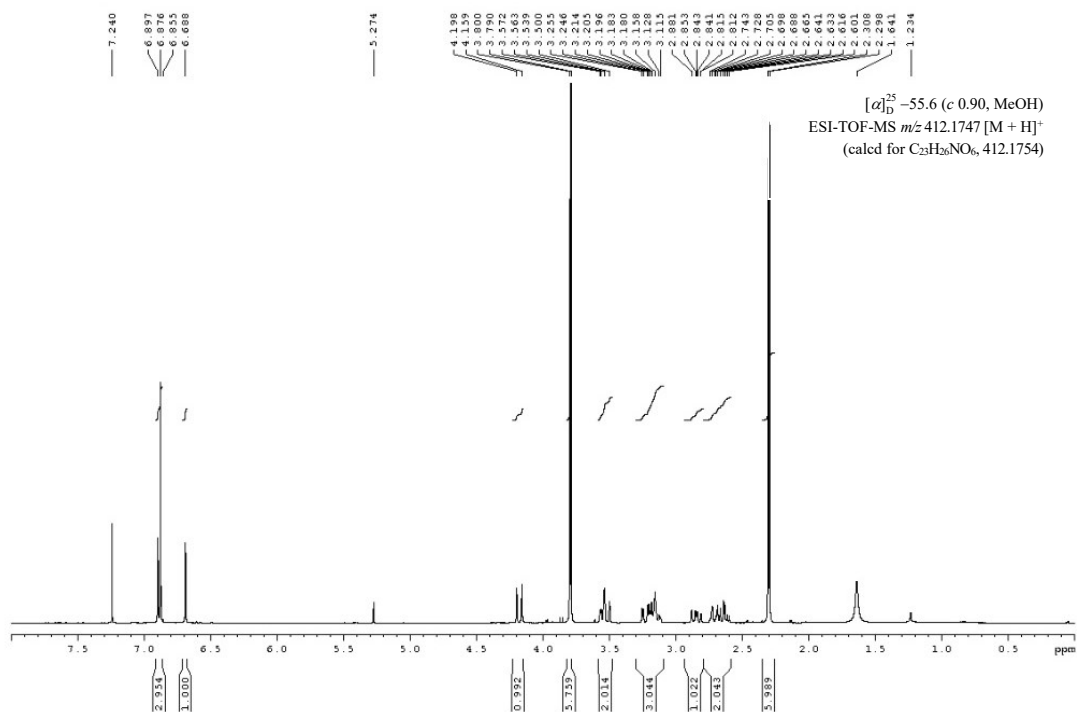

Figure S20. <sup>1</sup>H NMR spectrum (CDCl<sub>3</sub>, 400 MHz) of stephapierrine B (2)

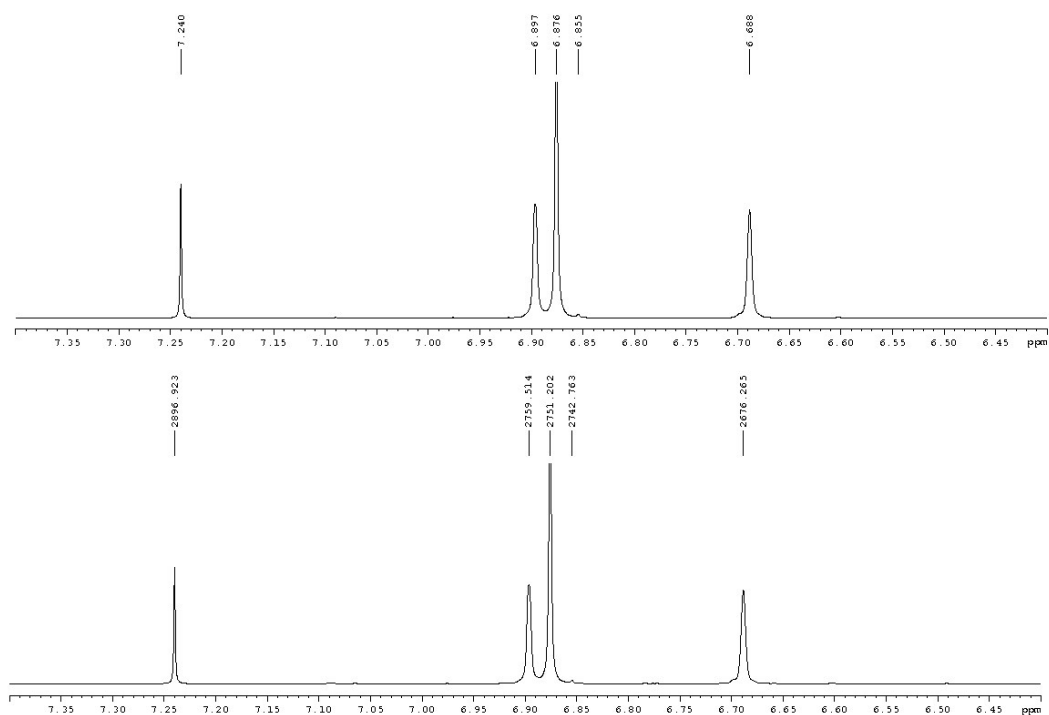

Figure S21. Expansion of <sup>1</sup>H NMR spectrum (CDCl<sub>3</sub>, 400 MHz) of stephapierrine B (2) (1)

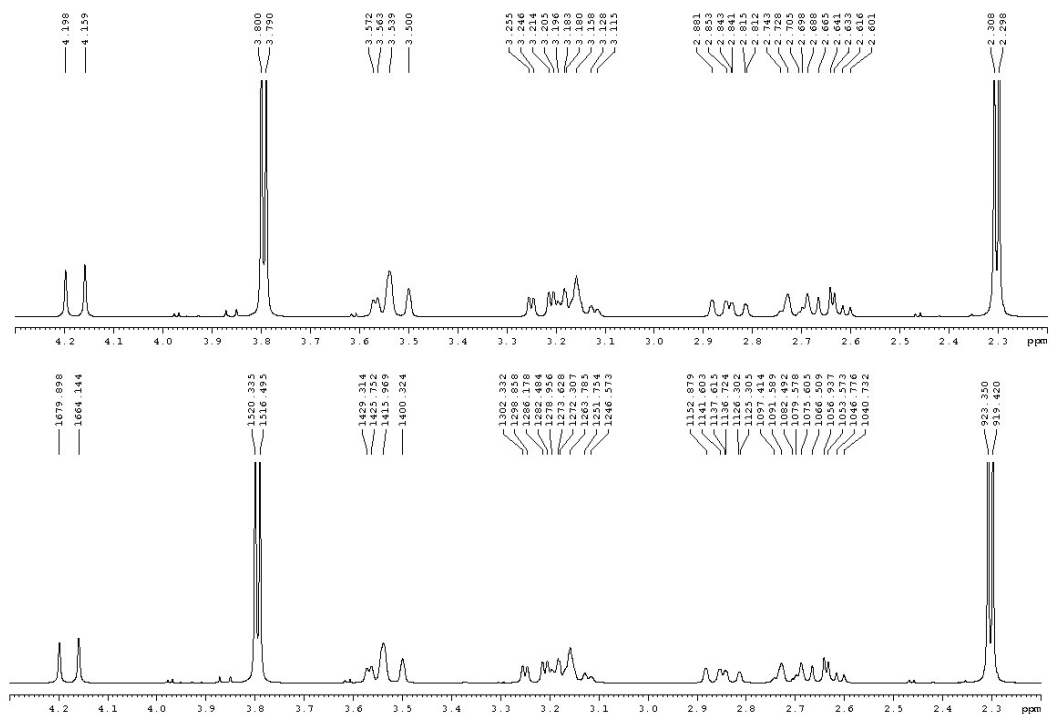

Figure S22. Expansion of <sup>1</sup>H NMR spectrum (CDCl<sub>3</sub>, 400 MHz) of stephapierrine B (2) (2)

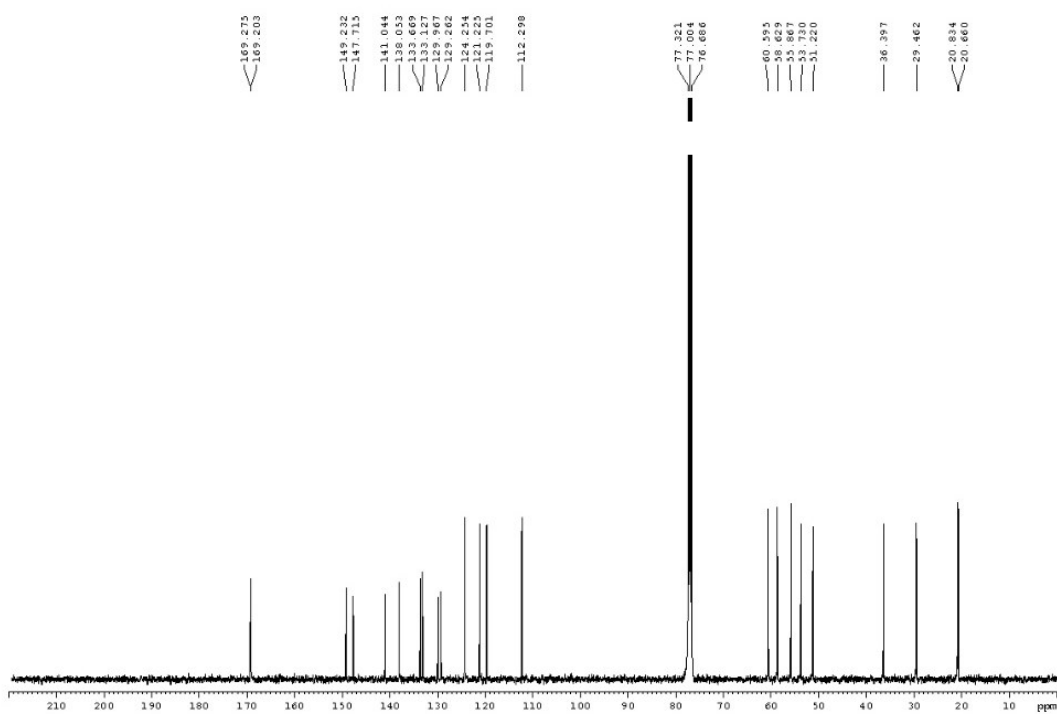

Figure S23. <sup>13</sup>C NMR spectrum (CDCl<sub>3</sub>, 100 MHz) of stephapierrine B (2)

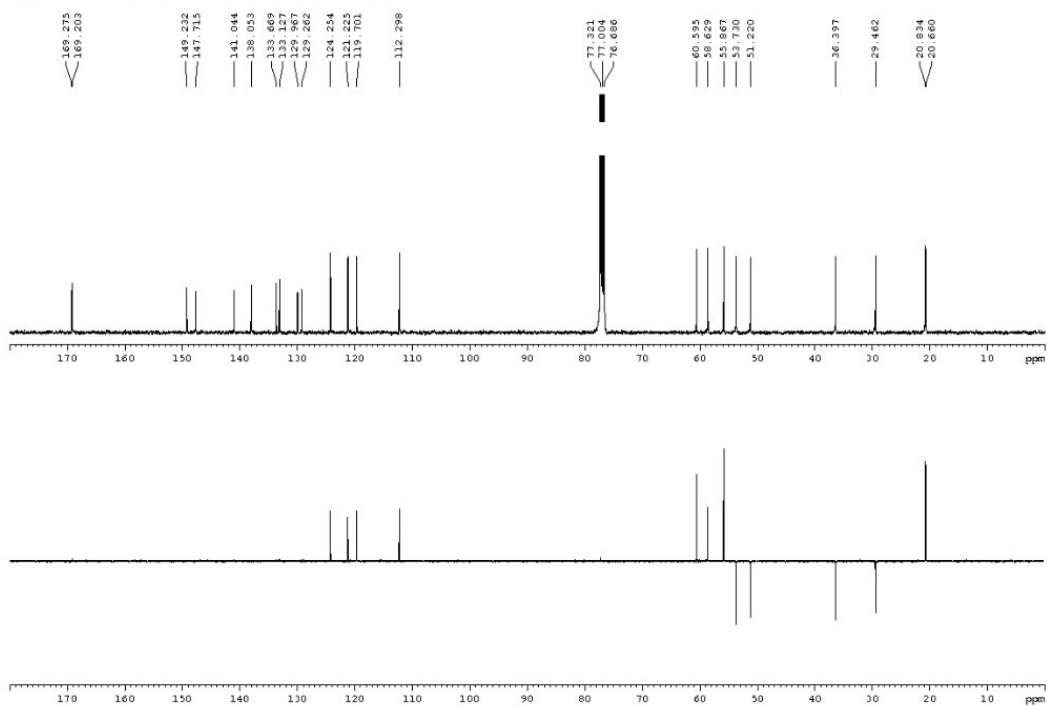

Figure S24. DEPT135 spectrum (CDCl<sub>3</sub>, 100 MHz) of stephapierrine B (2)

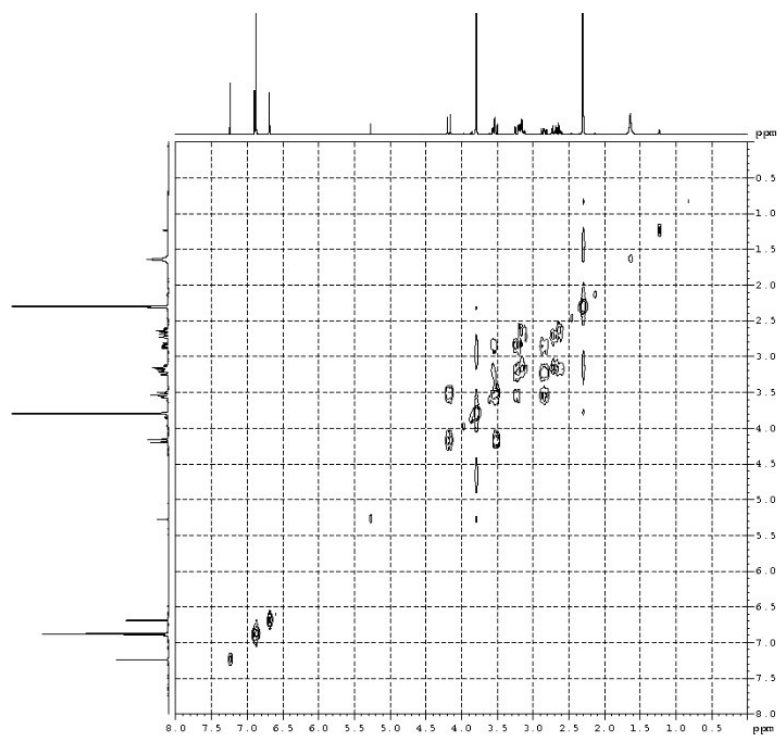

Figure S25. COSY spectrum of stephapierrine B (**2**) in  $\text{CDCl}_3$

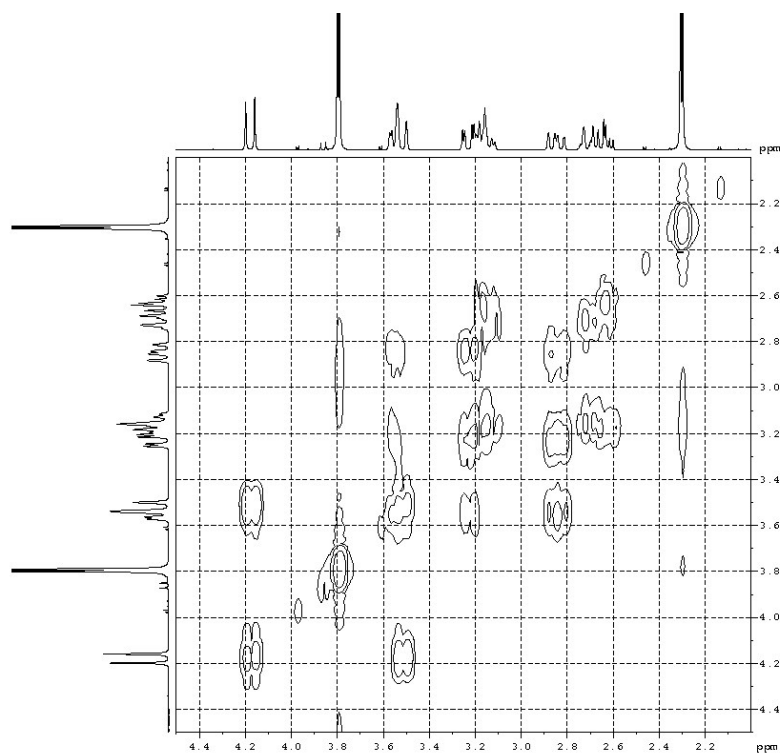

Figure S26. Expansion of COSY spectrum of stephapierrine B (**2**) in  $\text{CDCl}_3$

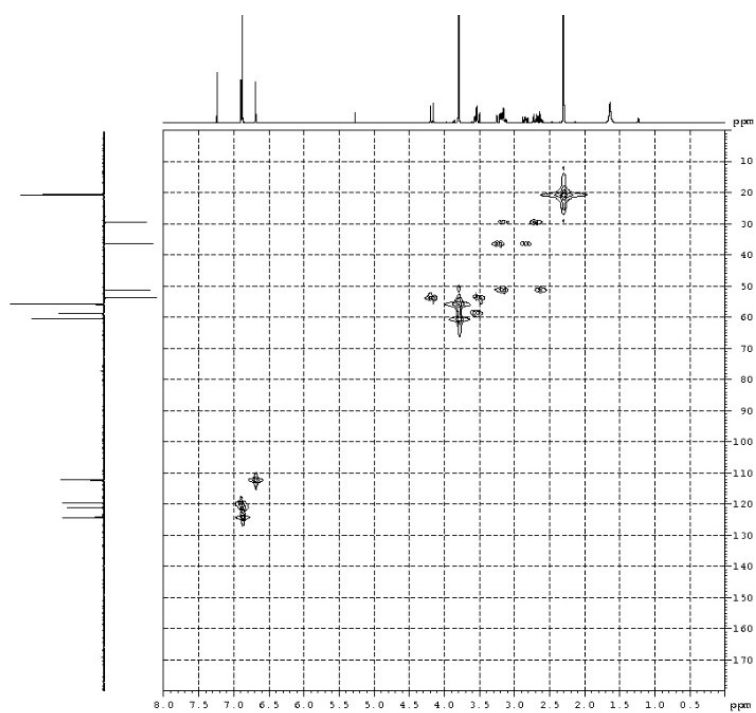

Figure S27. HMQC spectrum of stephapierrine B (2) in  $\text{CDCl}_3$

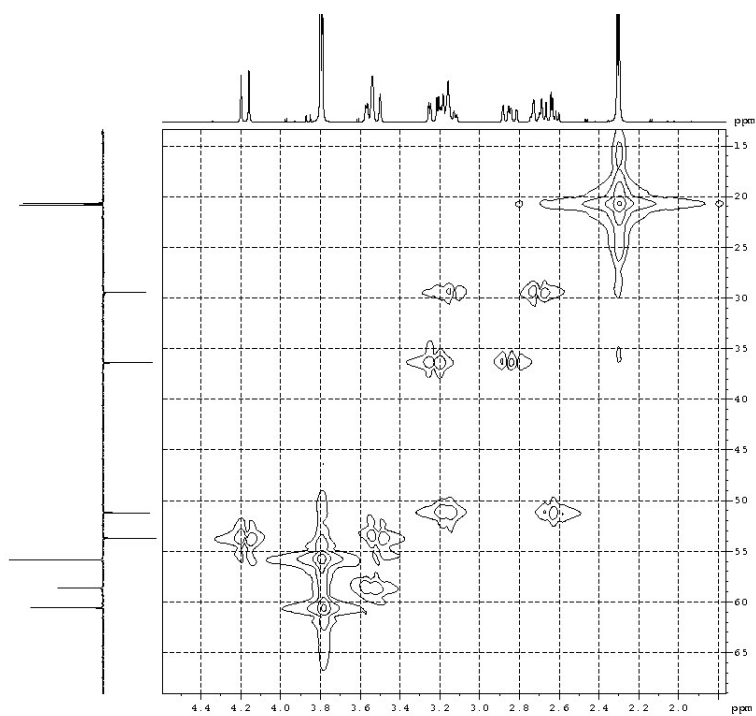

Figure S28. Expansion of HMQC spectrum of stephapierrine B (2) in  $\text{CDCl}_3$  (1)

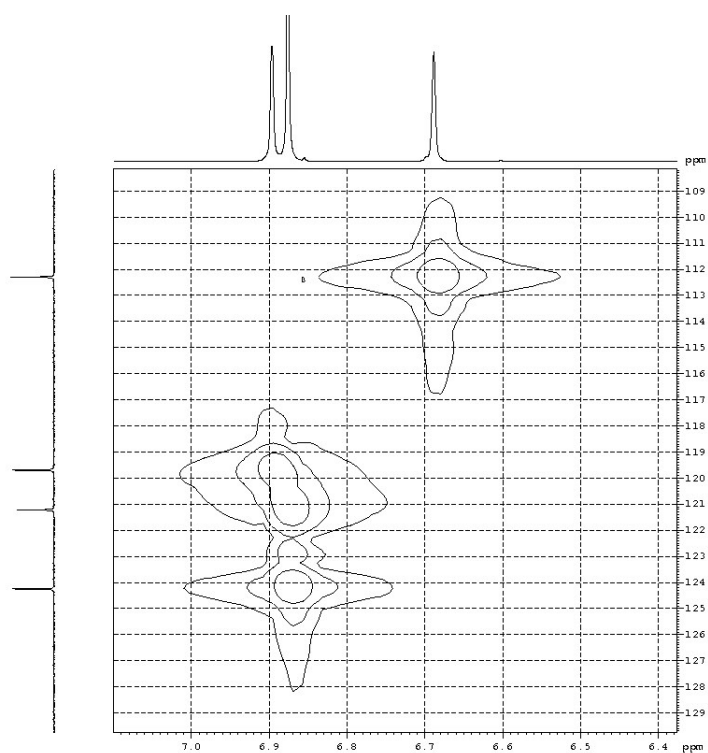

**Figure S29.** Expansion of HMQC spectrum of stephapierrine B (**2**) in  $\text{CDCl}_3$  (**2**)

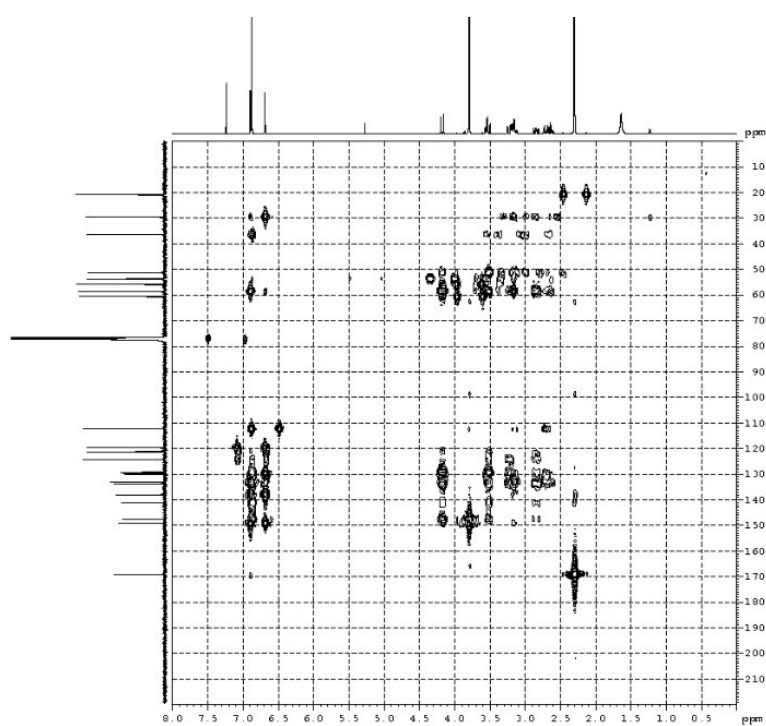

**Figure S30.** HMBC spectrum of stephapierrine B (**2**) in  $\text{CDCl}_3$



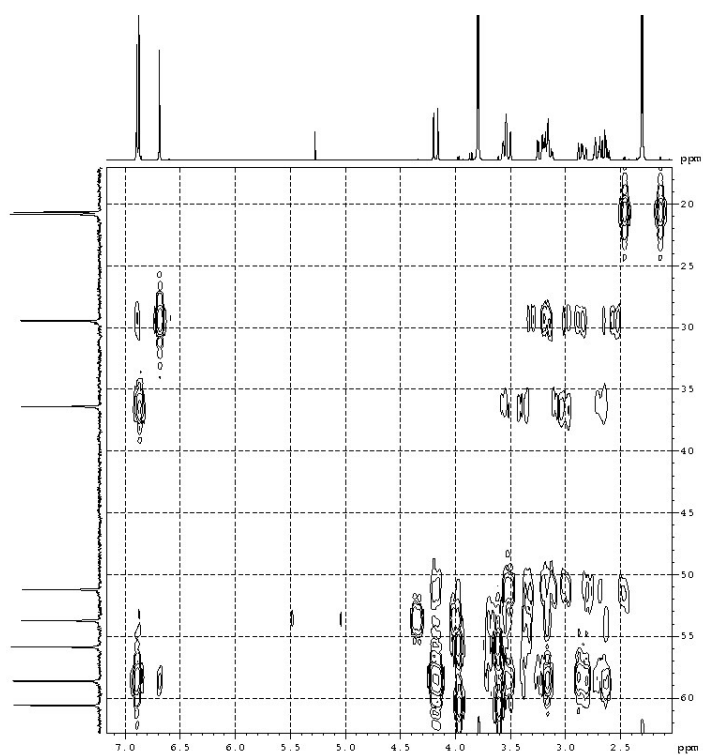

Figure S31. Expansion of HMBC spectrum of stephapierrine B (2) in CDCl<sub>3</sub> (1)

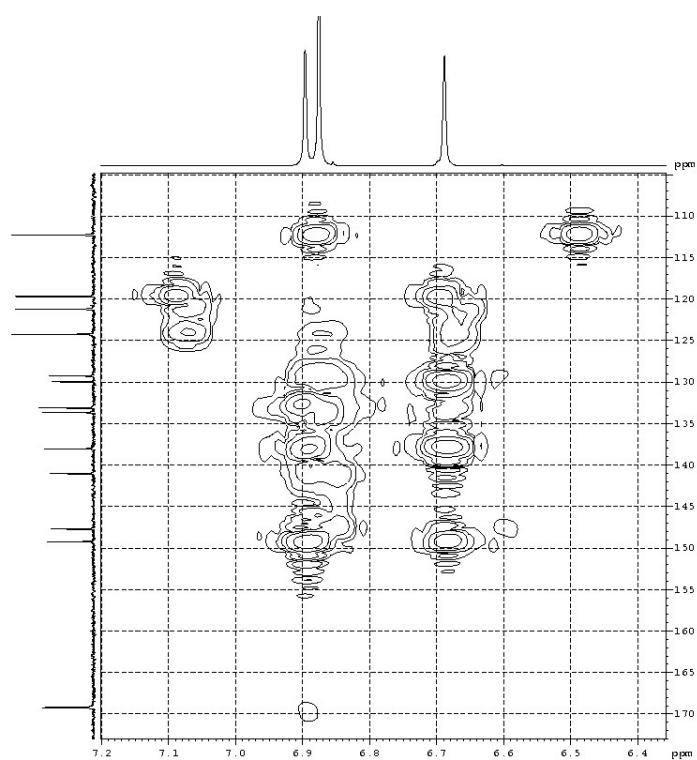

Figure S32. Expansion of HMBC spectrum of stephapierrine B (2) in CDCl<sub>3</sub> (2)

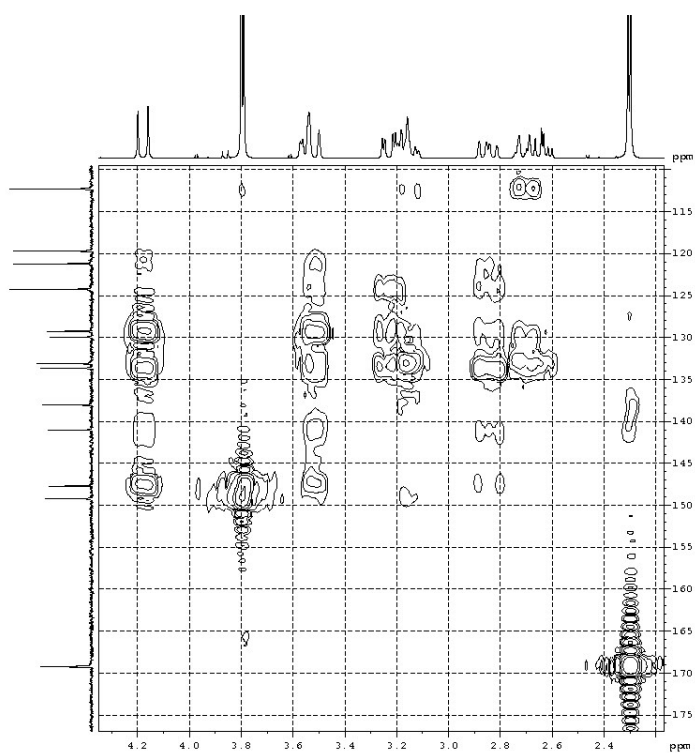

Figure S33. Expansion of HMBC spectrum of stephapierrine B (2) in  $\text{CDCl}_3$  (3)

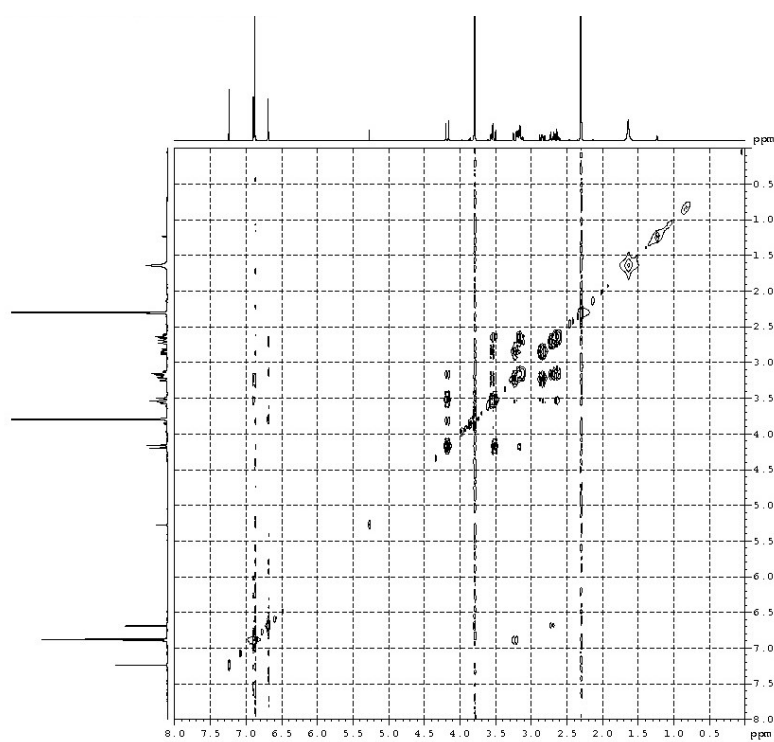

Figure S34. NOESY spectrum of stephapierrine B (2) in  $\text{CDCl}_3$

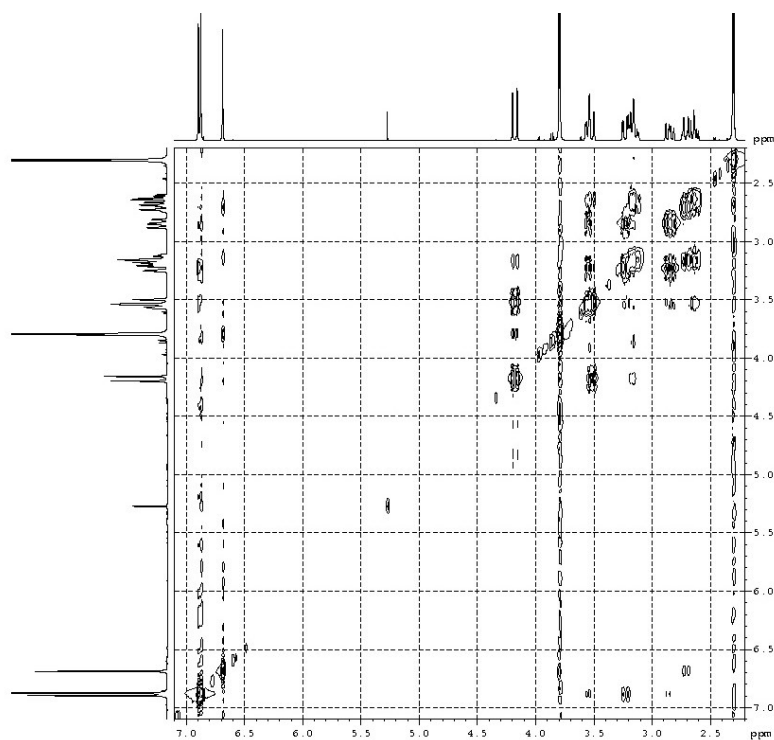

**Figure S35.** Expansion of NOESY spectrum of stephapierrine B (2) in CDCl<sub>3</sub> (1)

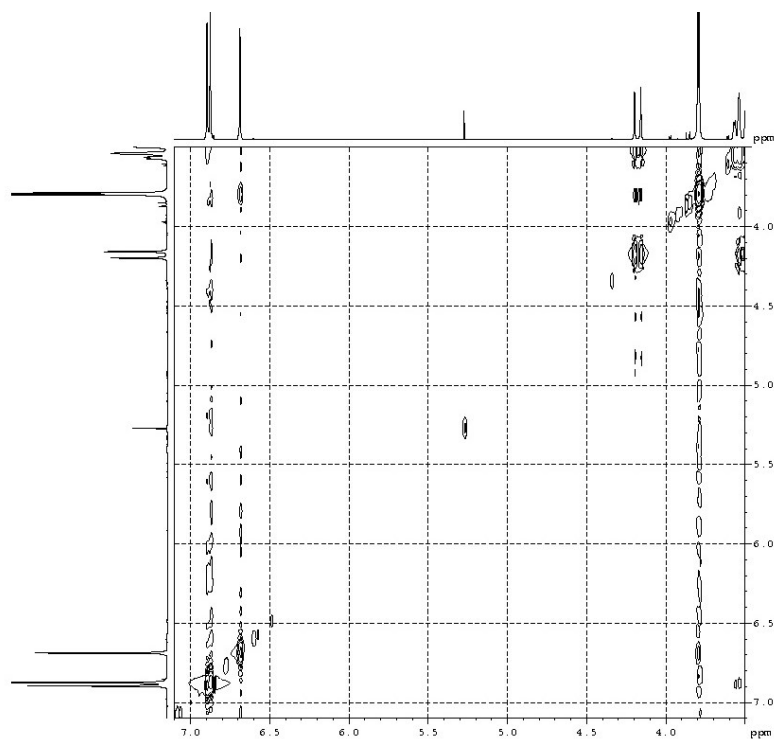

**Figure S36.** Expansion of NOESY spectrum of stephapierrine B (2) in CDCl<sub>3</sub> (2)

## Mass Spectrum SmartFormula Report

|                      |                                           |                                       |                        |
|----------------------|-------------------------------------------|---------------------------------------|------------------------|
| <b>Analysis Info</b> |                                           | Acquisition Date 12/7/2020 3:01:05 PM |                        |
| Analysis Name        | D:\Data\Apichart\ESIVAS-HRMS 1243 (pos).d | Operator                              | RU                     |
| Method               | tune_wide-RU.m                            | Instrument                            | micrOTOF 8213750.10411 |
| Sample Name          | AS-RU 19326                               | Comment                               |                        |

|                              |            |                      |           |
|------------------------------|------------|----------------------|-----------|
| <b>Acquisition Parameter</b> |            |                      |           |
| Source Type                  | ESI        | Ion Polarity         | Positive  |
| Focus                        | Not active | Set Nebulizer        | 0.3 Bar   |
| Scan Begin                   | 100 m/z    | Set Dry Heater       | 180 °C    |
| Scan End                     | 4000 m/z   | Set Capillary        | 4500 V    |
|                              |            | Set End Plate Offset | -500 V    |
|                              |            | Set Dry Gas          | 4.0 l/min |
|                              |            | Set Divert Valve     | Waste     |

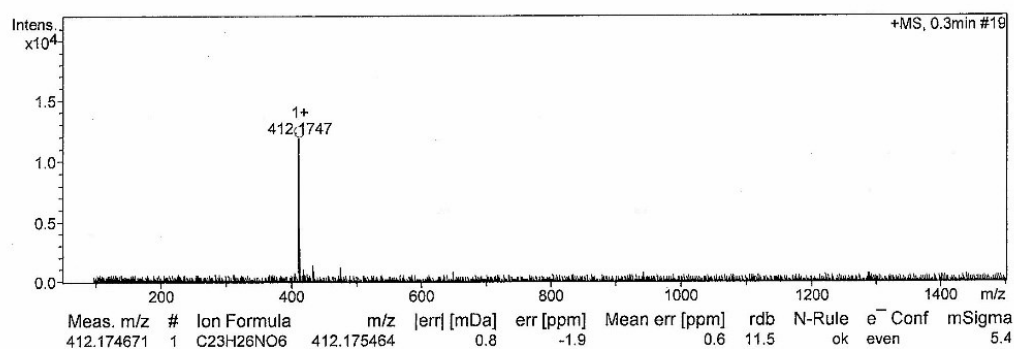

**Figure S37.** ESI-TOF-MS of stephapierrine B (2)

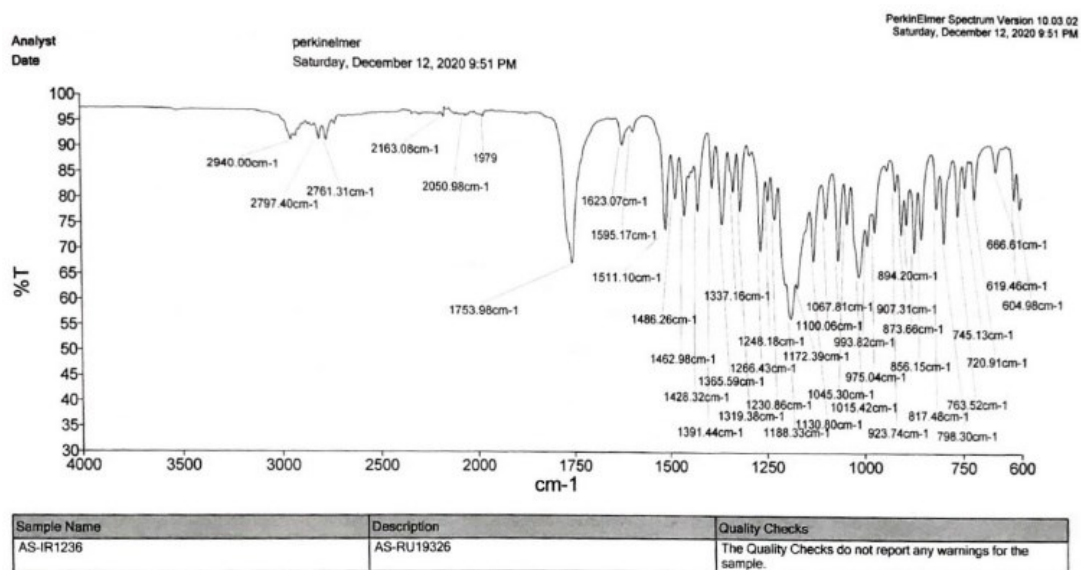

**Figure S38.** IR spectrum of stephapierrine B (2)

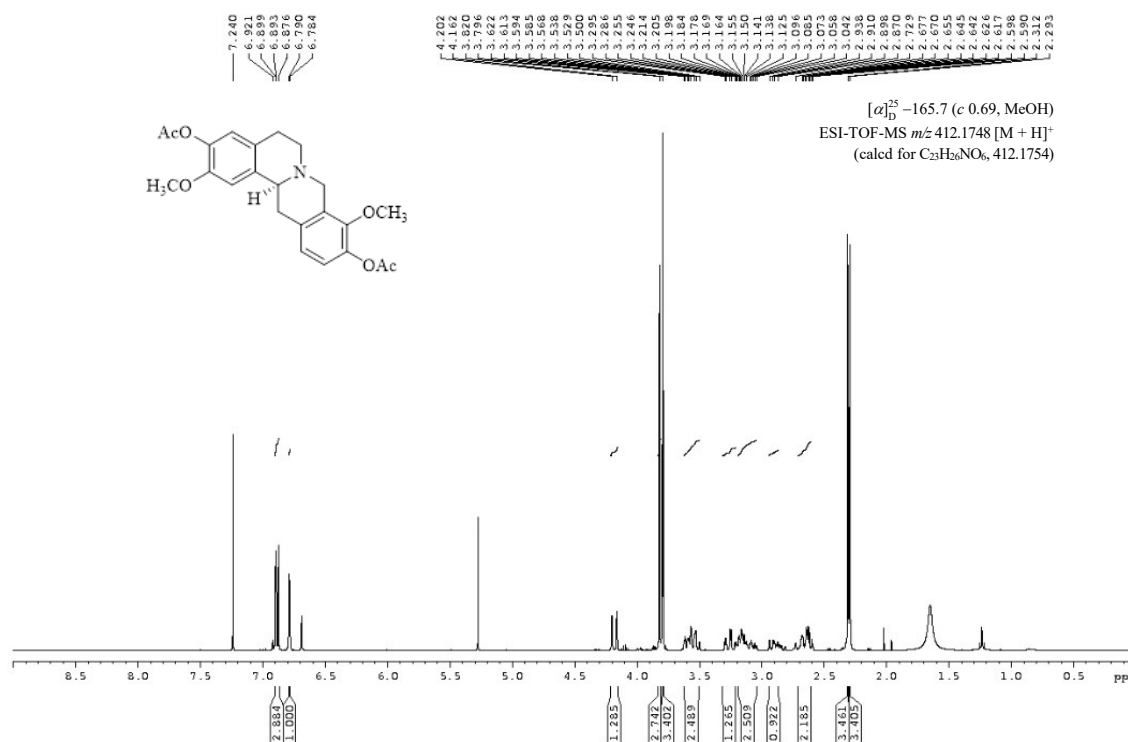

Figure S39. <sup>1</sup>H NMR spectrum (CDCl<sub>3</sub>, 400 MHz) of stephapierrine C (3)

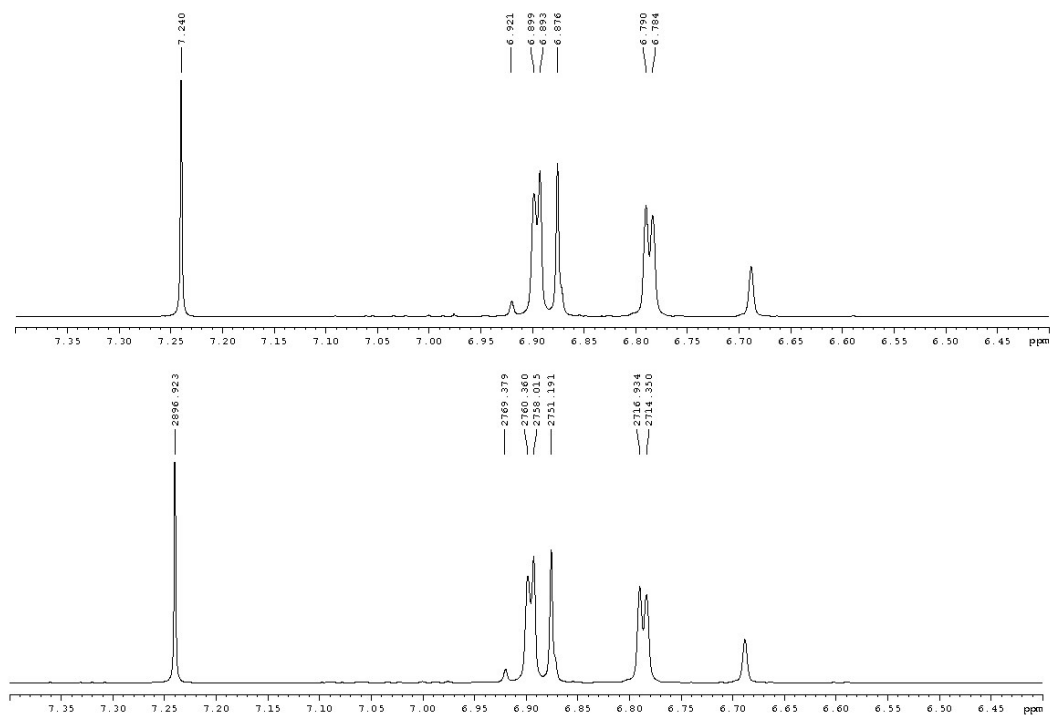

Figure S40. Expansion of <sup>1</sup>H NMR spectrum (CDCl<sub>3</sub>, 400 MHz) of stephapierrine C (3) (1)

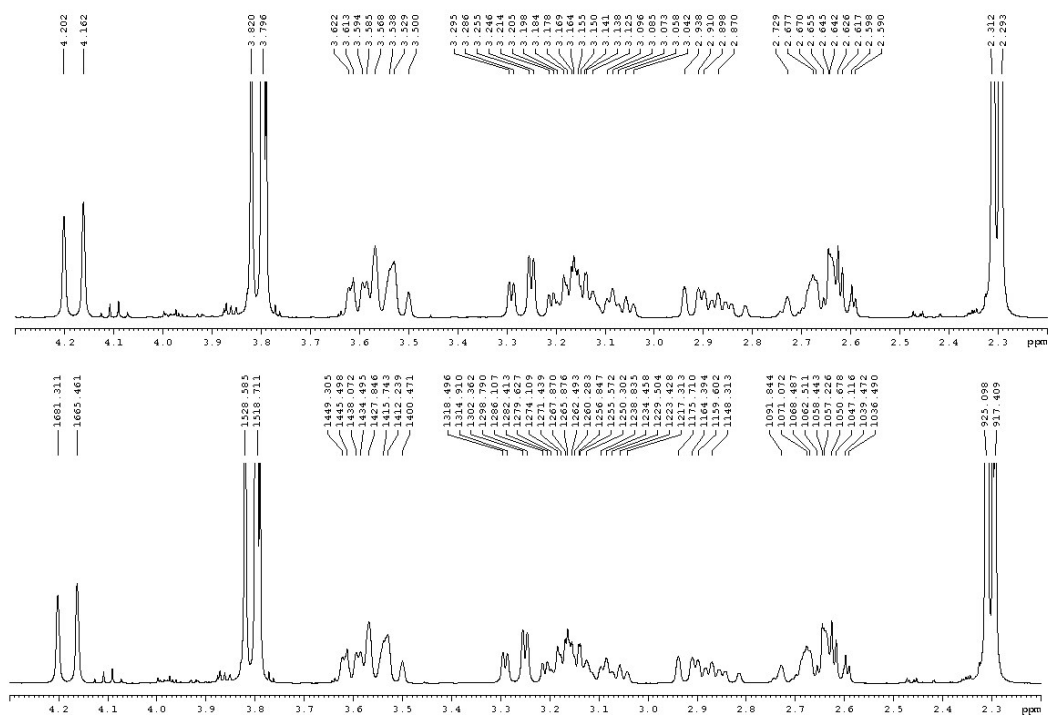

**Figure S41.** Expansion of  $^1\text{H}$  NMR spectrum ( $\text{CDCl}_3$ , 400 MHz) of stephapierrine C (**3**) (2)

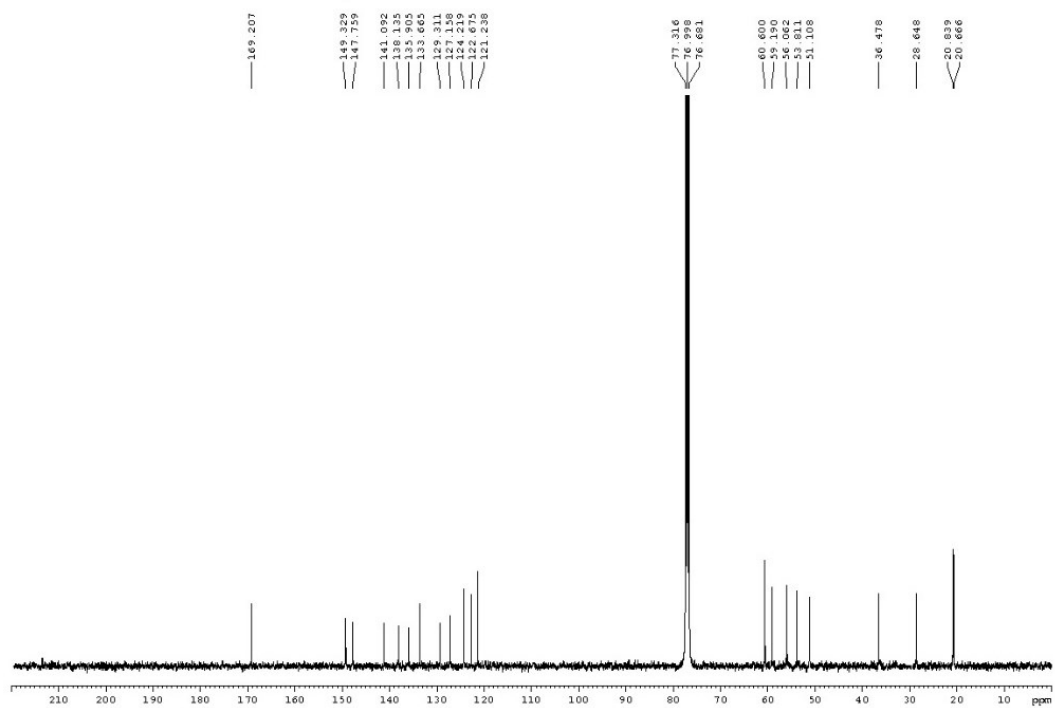

**Figure S42.**  $^{13}\text{C}$  NMR spectrum ( $\text{CDCl}_3$ , 100 MHz) of stephapierrine C (**3**)

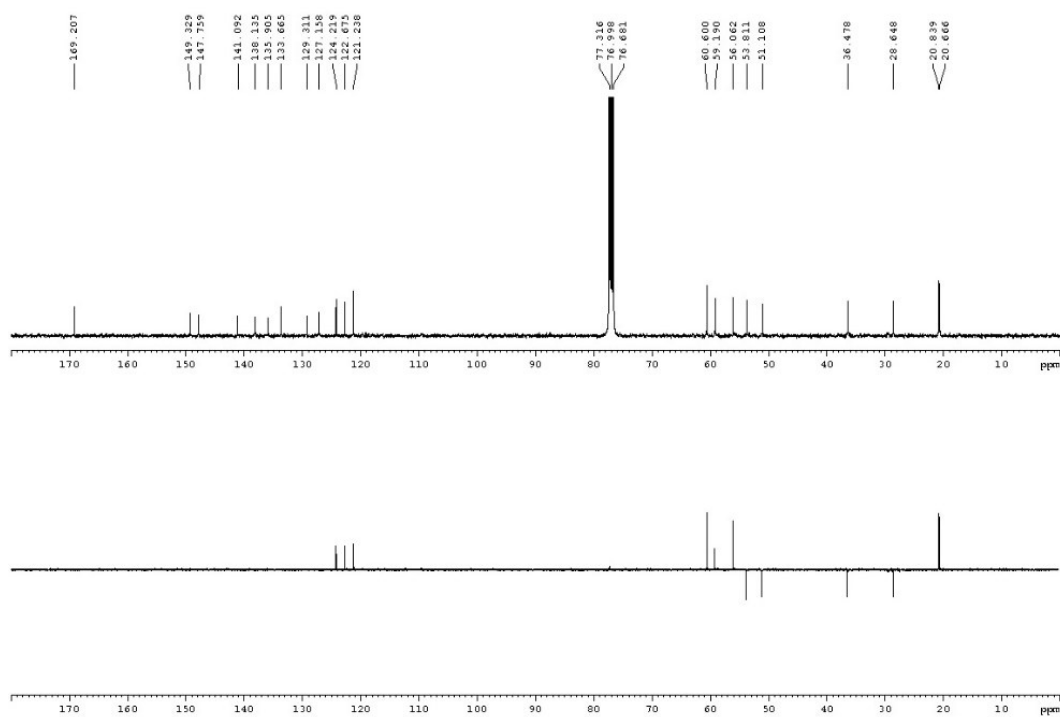

Figure S43. DEPT135 spectrum (CDCl<sub>3</sub>, 100 MHz) of stephapierrine C (3)

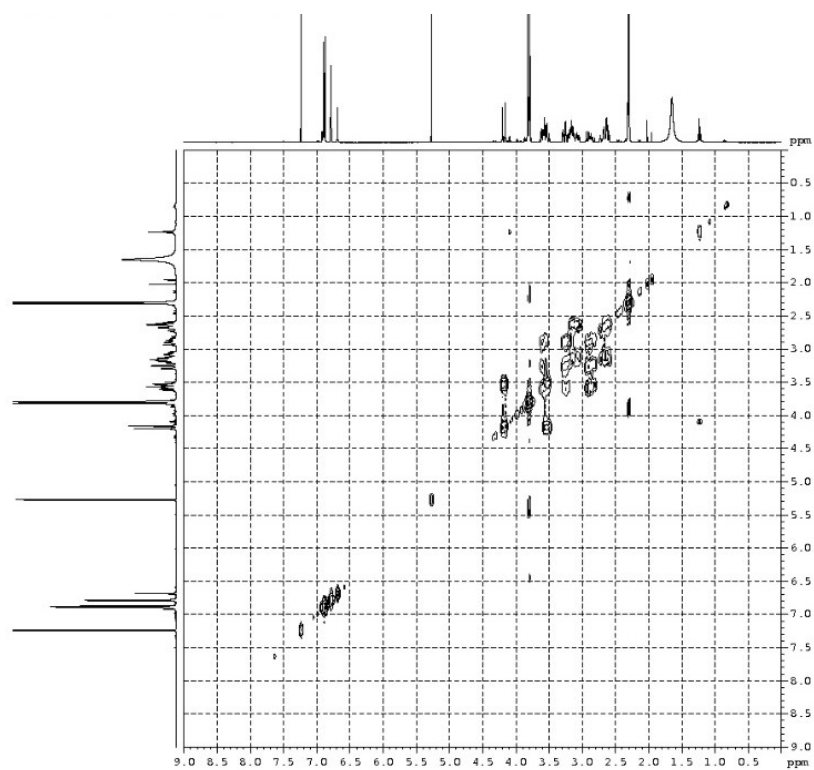

Figure S44. COSY spectrum of stephapierrine C (3) in CDCl<sub>3</sub>

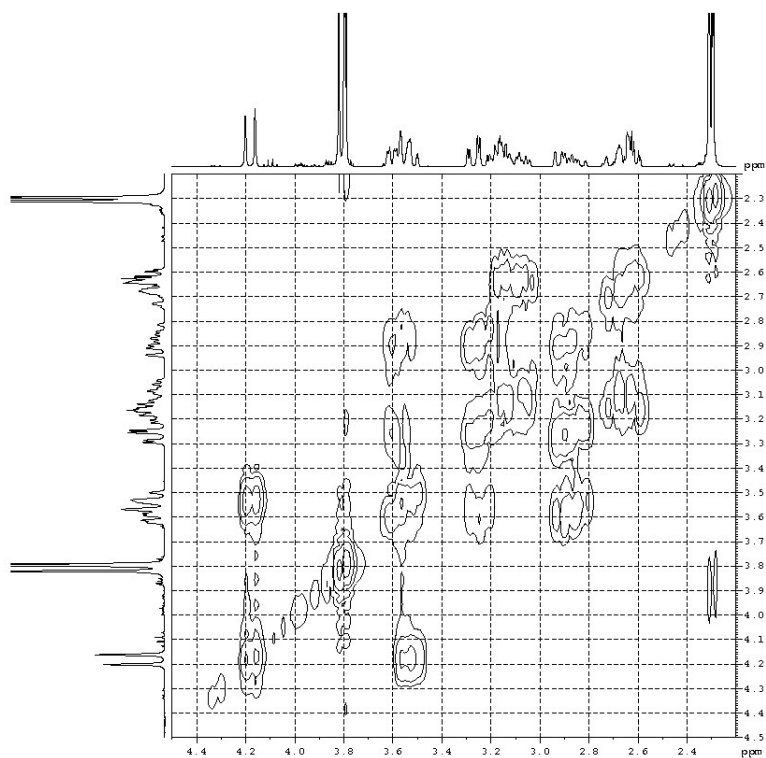

**Figure S45.** Expansion of COSY spectrum of stephapierrine C (**3**) in CDCl<sub>3</sub>

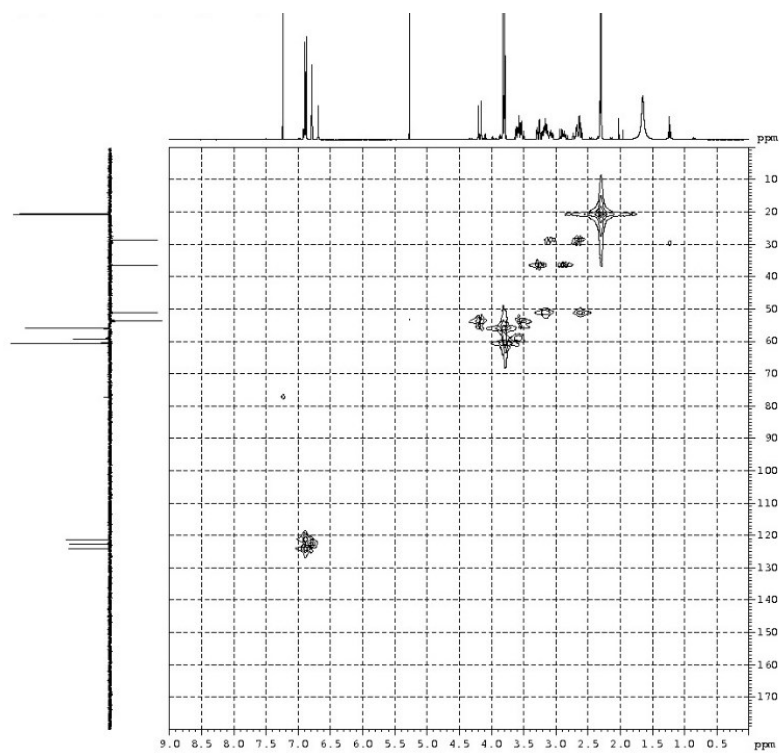

**Figure S46.** HMQC spectrum of stephapierrine C (**3**) in CDCl<sub>3</sub>



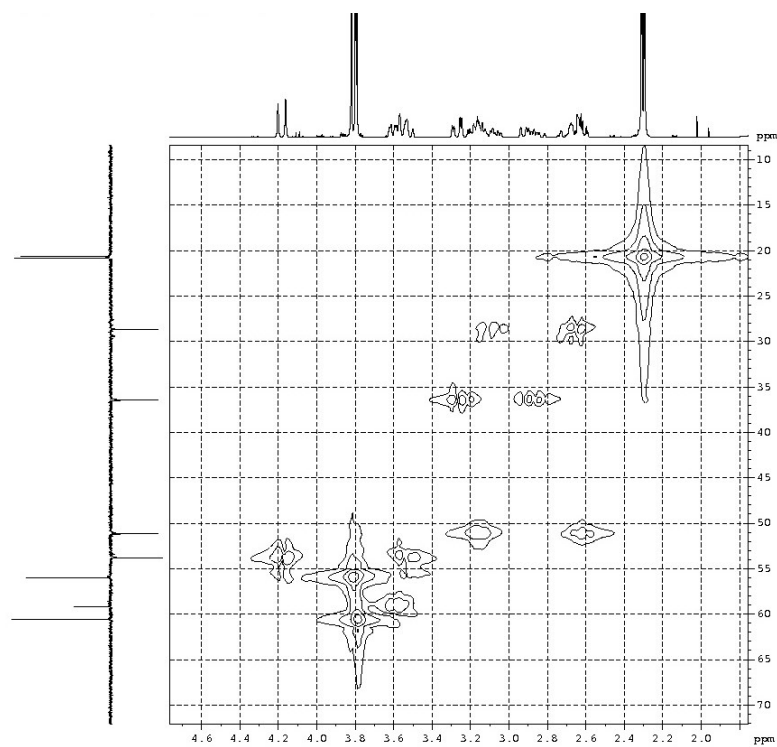

**Figure S47.** Expansion of HMQC spectrum of stephapierrine C (**3**) in CDCl<sub>3</sub> (1)

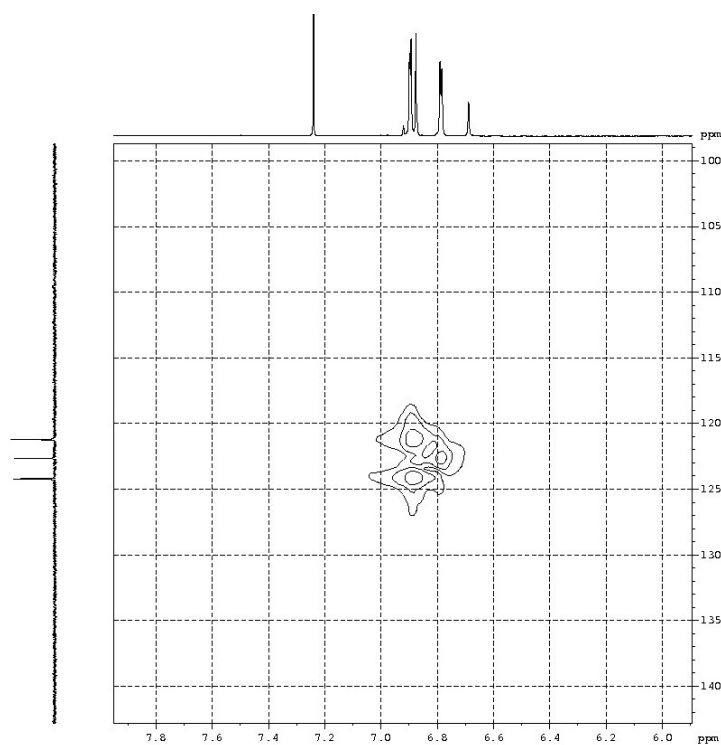

**Figure S48.** Expansion of HMQC spectrum of stephapierrine C (**3**) in CDCl<sub>3</sub> (2)

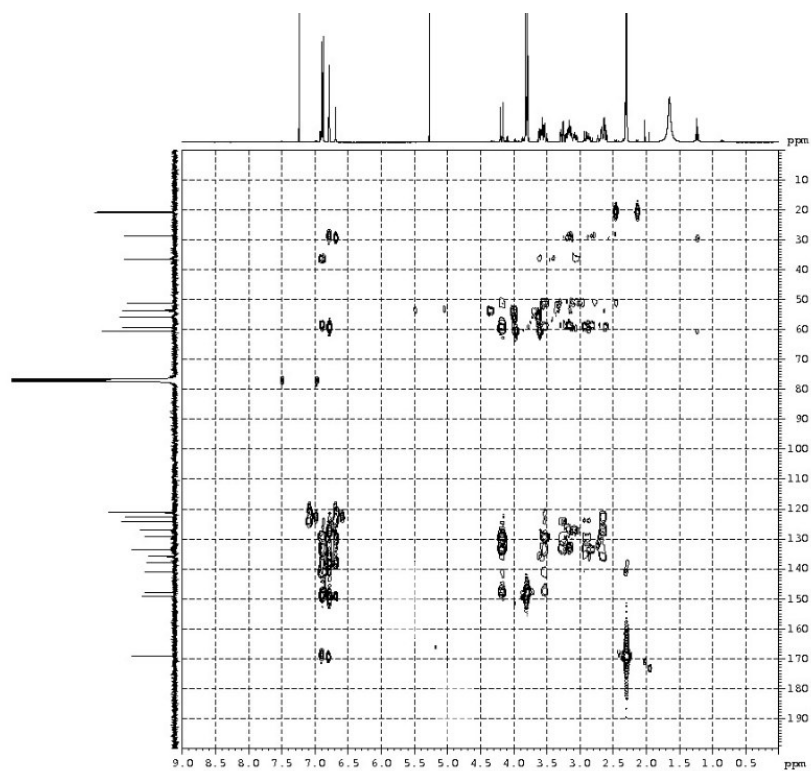

Figure S49. HMBC spectrum of stephapierrine C (3) in CDCl<sub>3</sub>

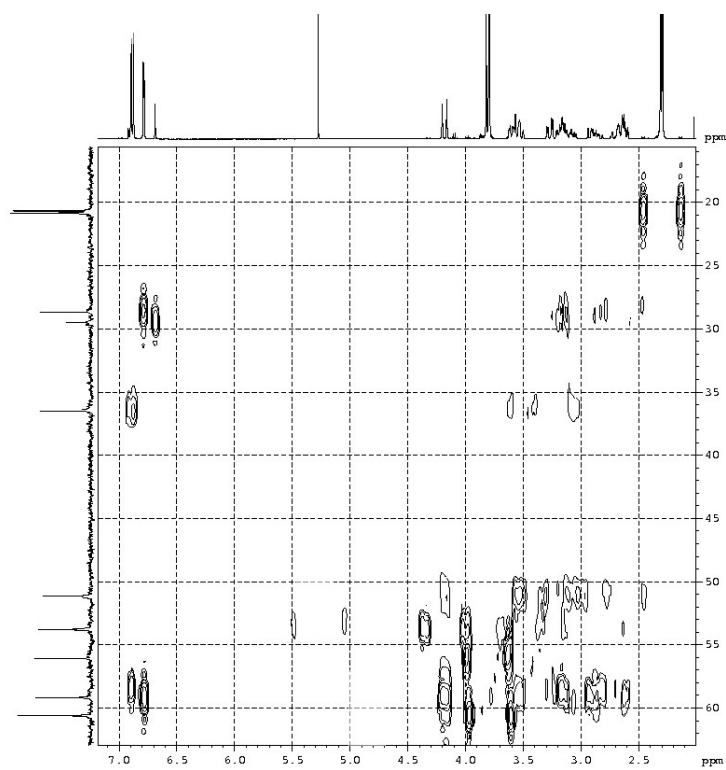

Figure S50. Expansion of HMBC spectrum of stephapierrine C (3) in CDCl<sub>3</sub> (1)

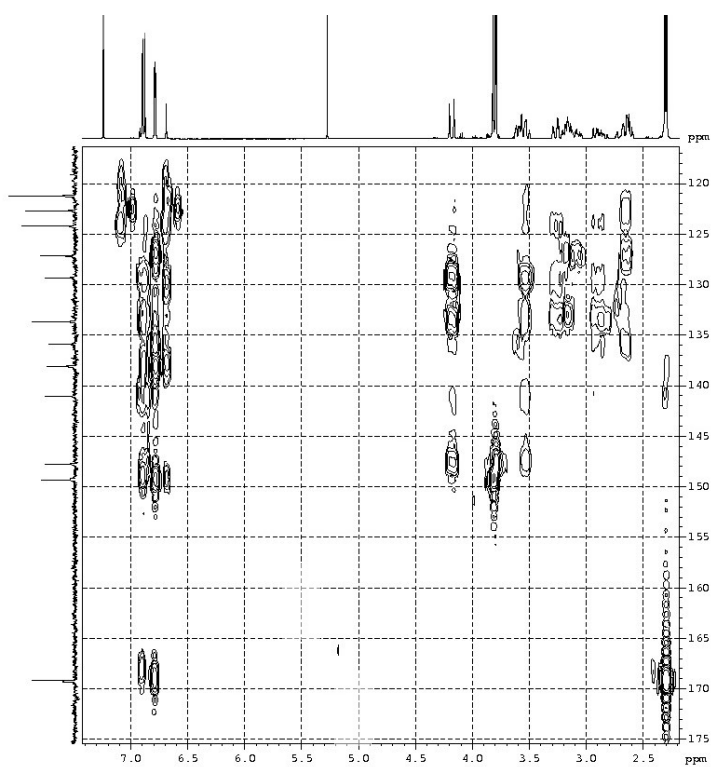

**Figure S51.** Expansion of HMBC spectrum of stephapierrine C (**3**) in  $\text{CDCl}_3$  (**2**)

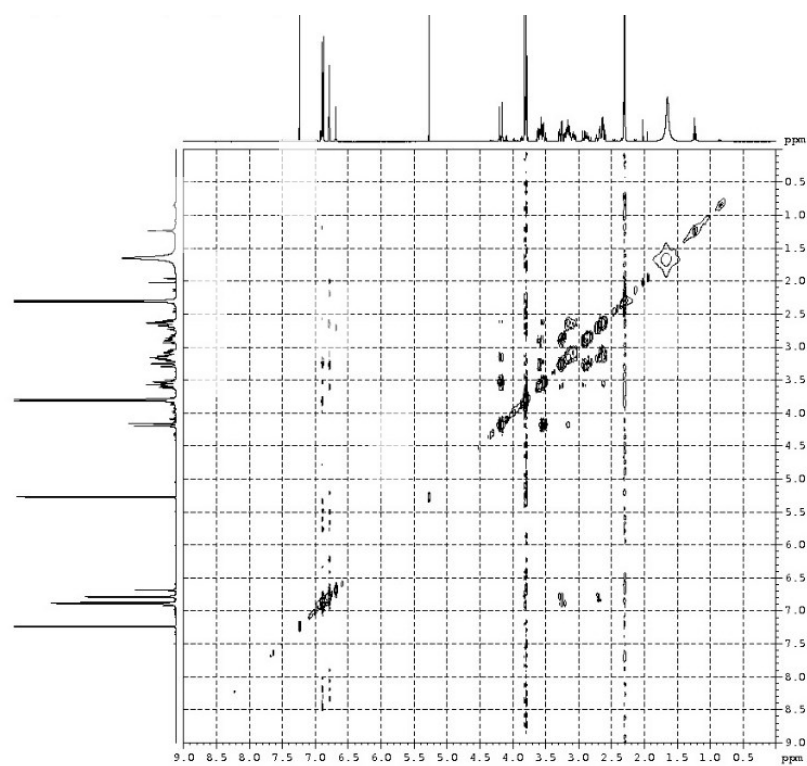

**Figure S52.** NOESY spectrum of stephapierrine C (**3**) in  $\text{CDCl}_3$

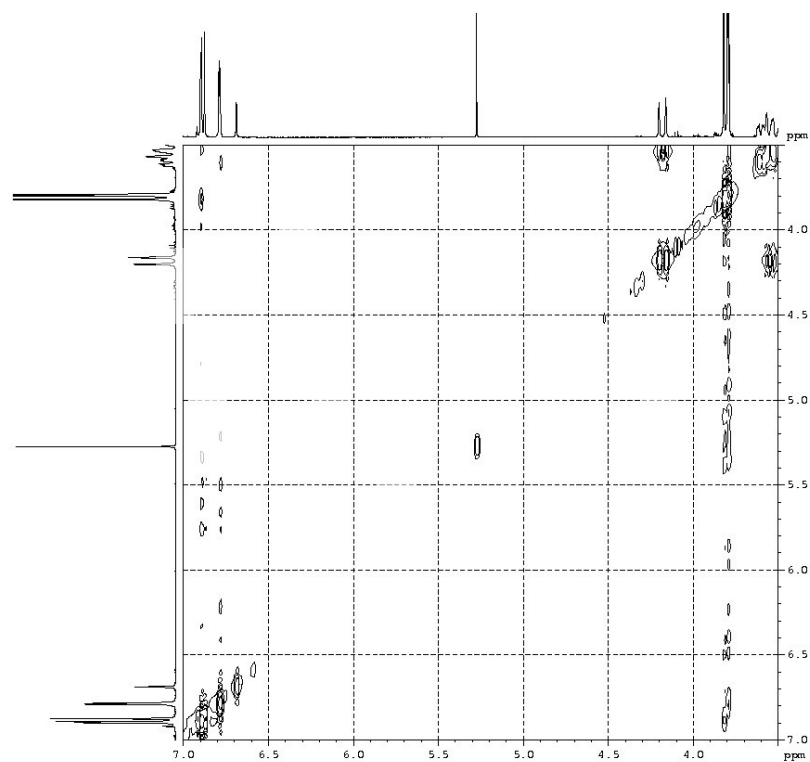

**Figure S53.** Expansion of NOESY spectrum of stephapierrine C (**3**) in CDCl<sub>3</sub> (1)

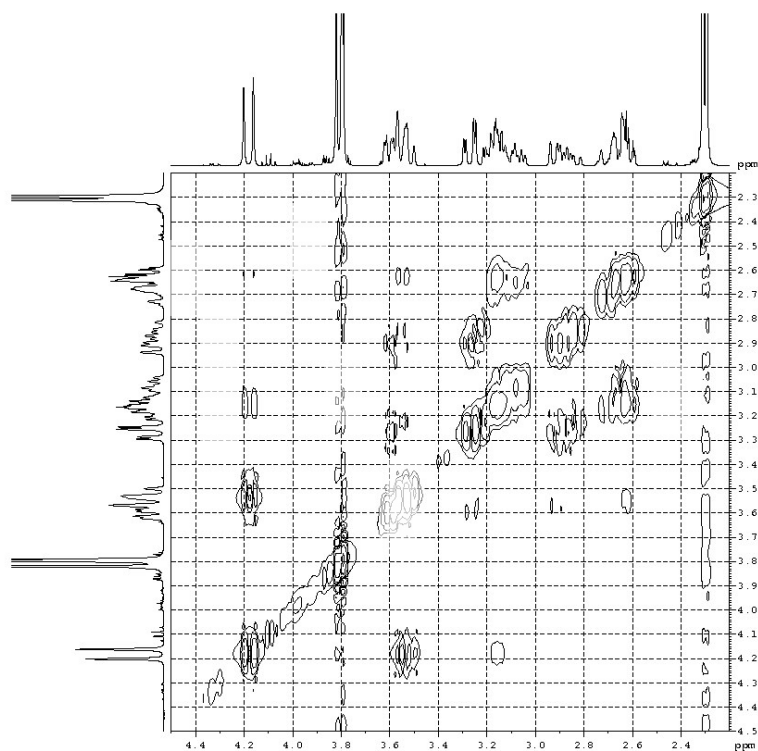

**Figure S54.** Expansion of NOESY spectrum of stephapierrine C (**3**) in CDCl<sub>3</sub> (2)

## Mass Spectrum SmartFormula Report

|                      |                                           |                                       |
|----------------------|-------------------------------------------|---------------------------------------|
| <b>Analysis Info</b> |                                           | Acquisition Date 12/7/2020 2:57:22 PM |
| Analysis Name        | D:\Data\Apichart\ESI\AS-HRMS 1241 (pos).d |                                       |
| Method               | tune_wide-RU.m                            | Operator RU                           |
| Sample Name          | AS-RU 19328                               | Instrument micrOTOF 8213750.10411     |
| Comment              |                                           |                                       |

|                              |            |                      |          |                  |           |
|------------------------------|------------|----------------------|----------|------------------|-----------|
| <b>Acquisition Parameter</b> |            |                      |          |                  |           |
| Source Type                  | ESI        | Ion Polarity         | Positive | Set Nebulizer    | 0.3 Bar   |
| Focus                        | Not active |                      |          | Set Dry Heater   | 180 °C    |
| Scan Begin                   | 100 m/z    | Set Capillary        | 4500 V   | Set Dry Gas      | 4.0 l/min |
| Scan End                     | 4000 m/z   | Set End Plate Offset | -500 V   | Set Divert Valve | Waste     |

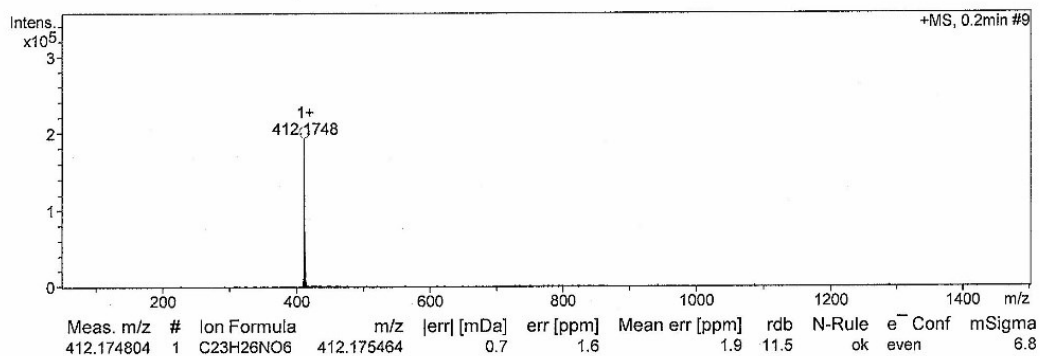

**Figure S55.** ESI-TOF-MS of stephapierrine C (3)

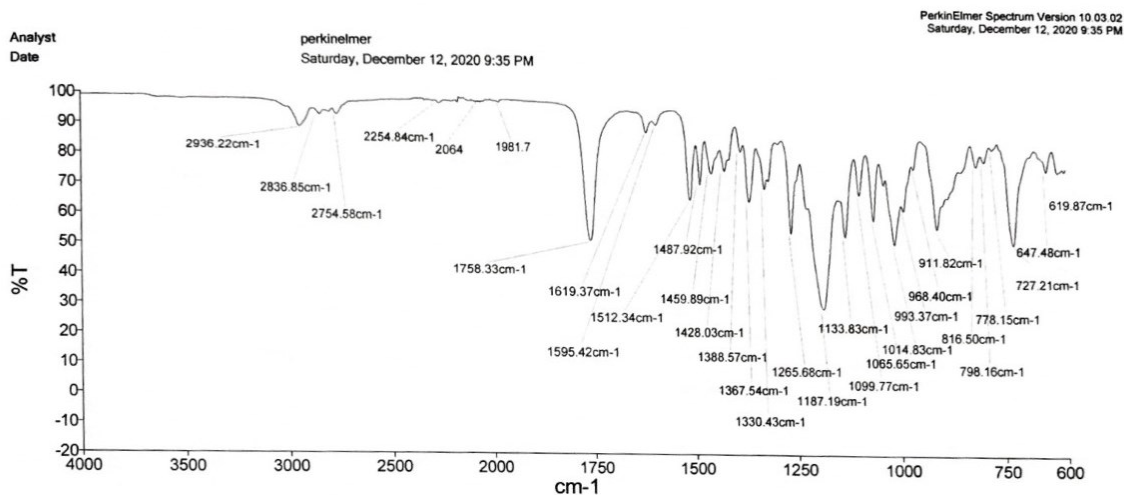

| Sample Name | Description | Quality Checks                                                |
|-------------|-------------|---------------------------------------------------------------|
| AS-IR1234   | AS-RU19328  | The Quality Checks do not report any warnings for the sample. |

**Figure S56.** IR spectrum of stephapierrine C (3)

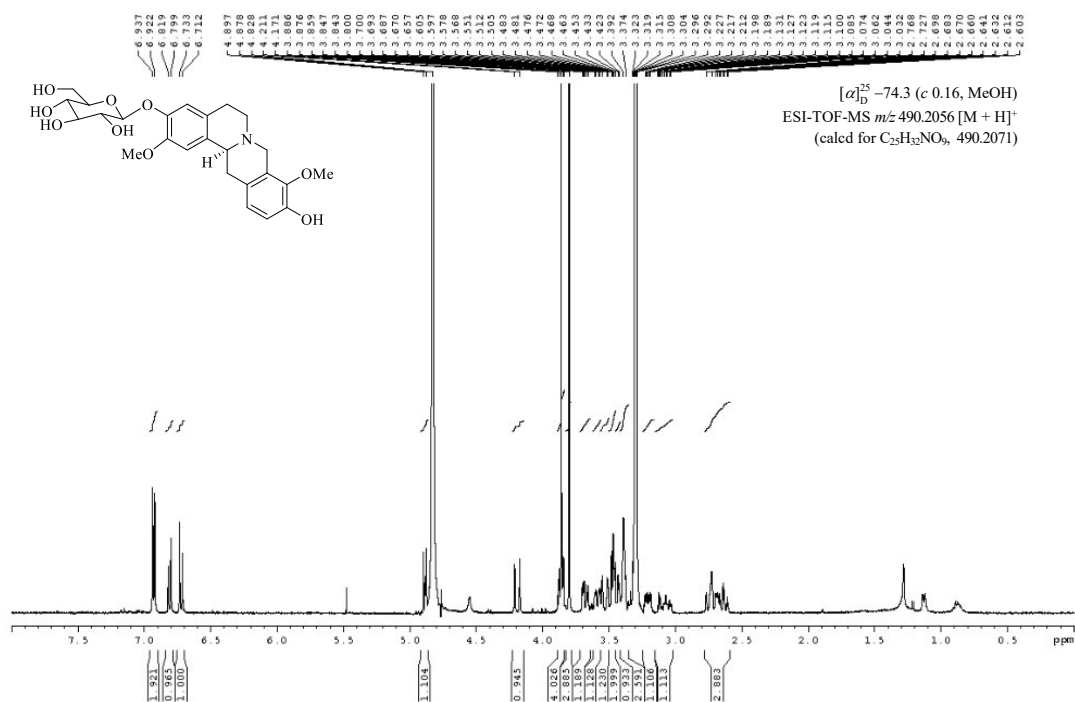

Figure S57.  $^1\text{H}$  NMR spectrum ( $\text{CD}_3\text{OD}$ , 400 MHz) of stephapierrine D (4)

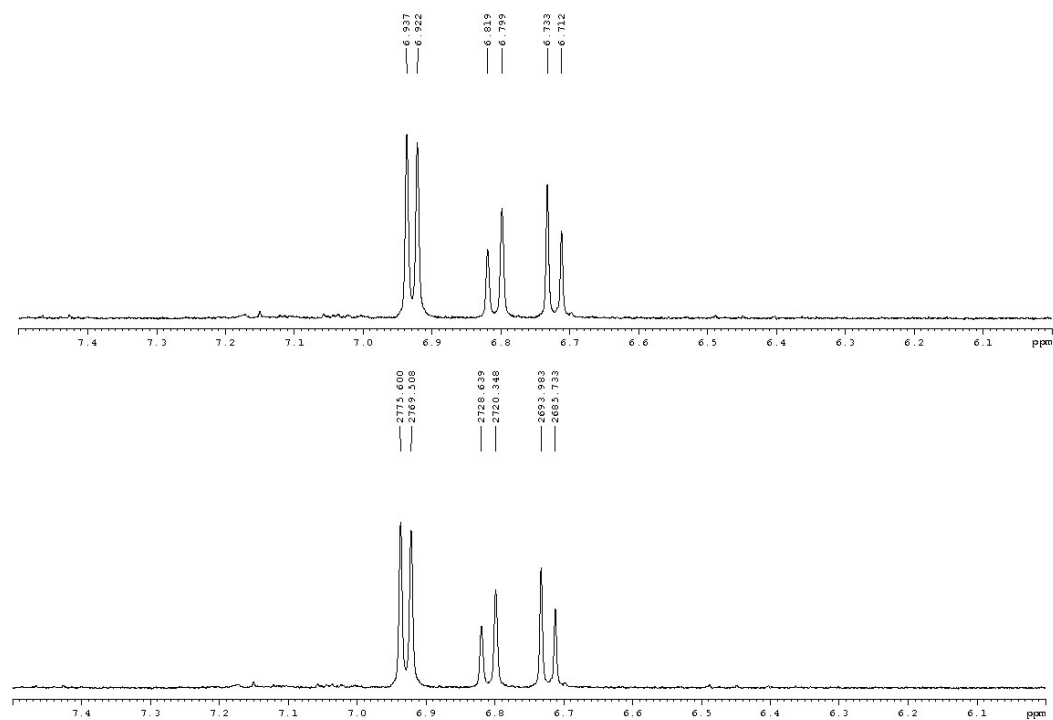

Figure S58. Expansion of  $^1\text{H}$  NMR spectrum ( $\text{CD}_3\text{OD}$ , 400 MHz) of stephapierrine D (4) (1)

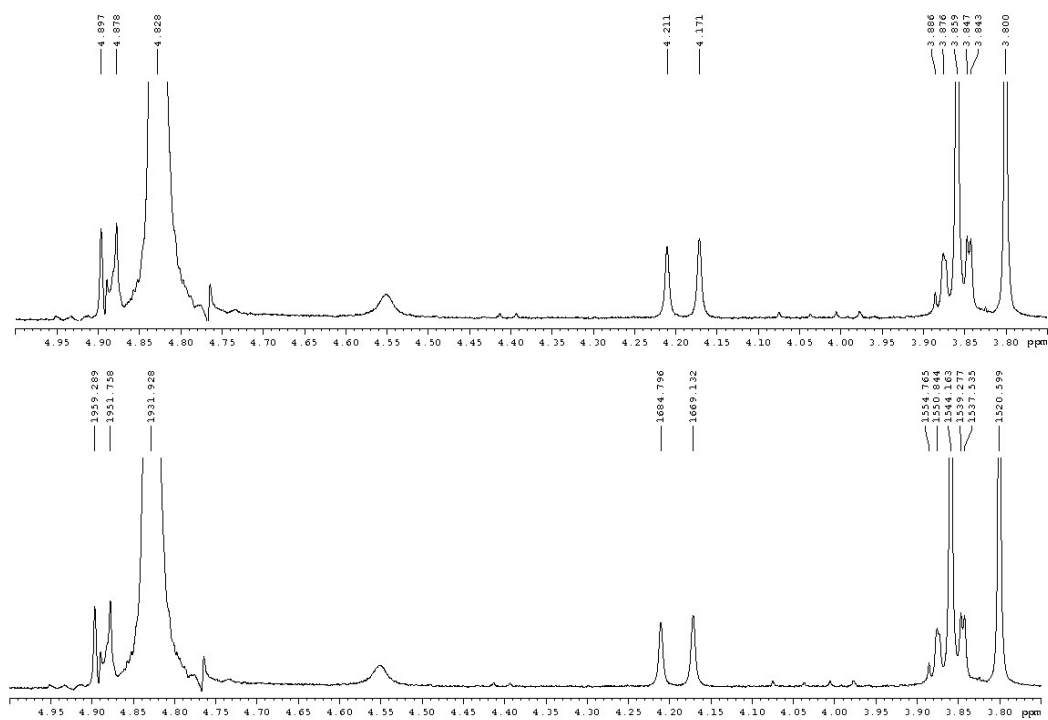

Figure S59. Expansion of  $^1\text{H}$  NMR spectrum ( $\text{CD}_3\text{OD}$ , 400 MHz) of stephapierrine D (4) (2)

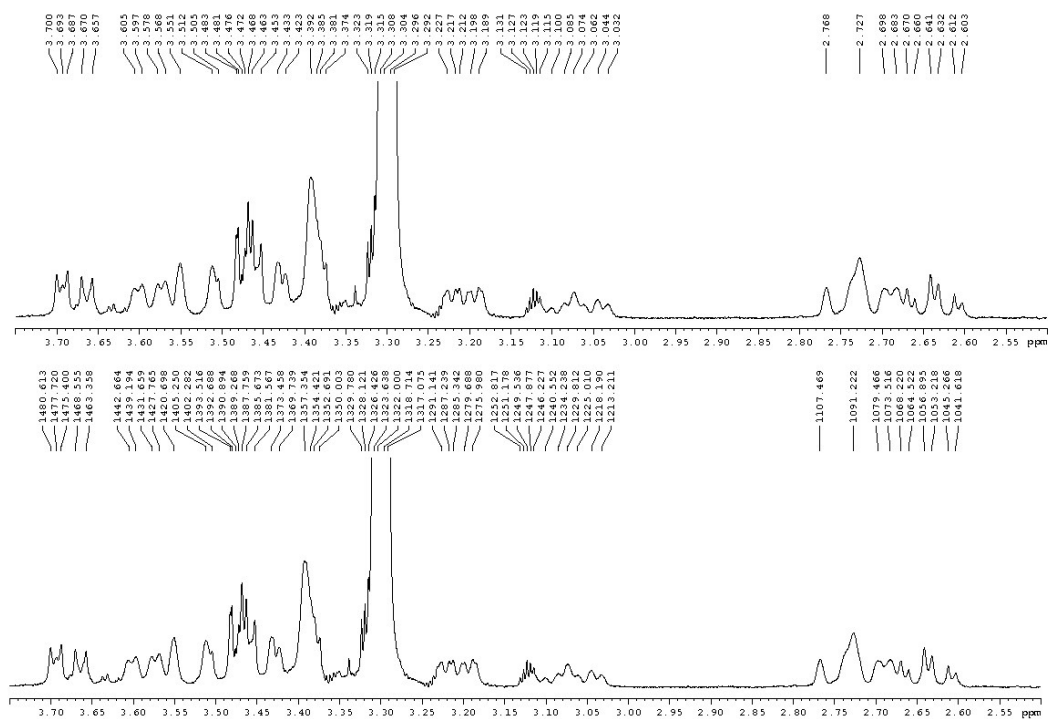

Figure S60. Expansion of  $^1\text{H}$  NMR spectrum ( $\text{CD}_3\text{OD}$ , 400 MHz) of stephapierrine D (4) (3)

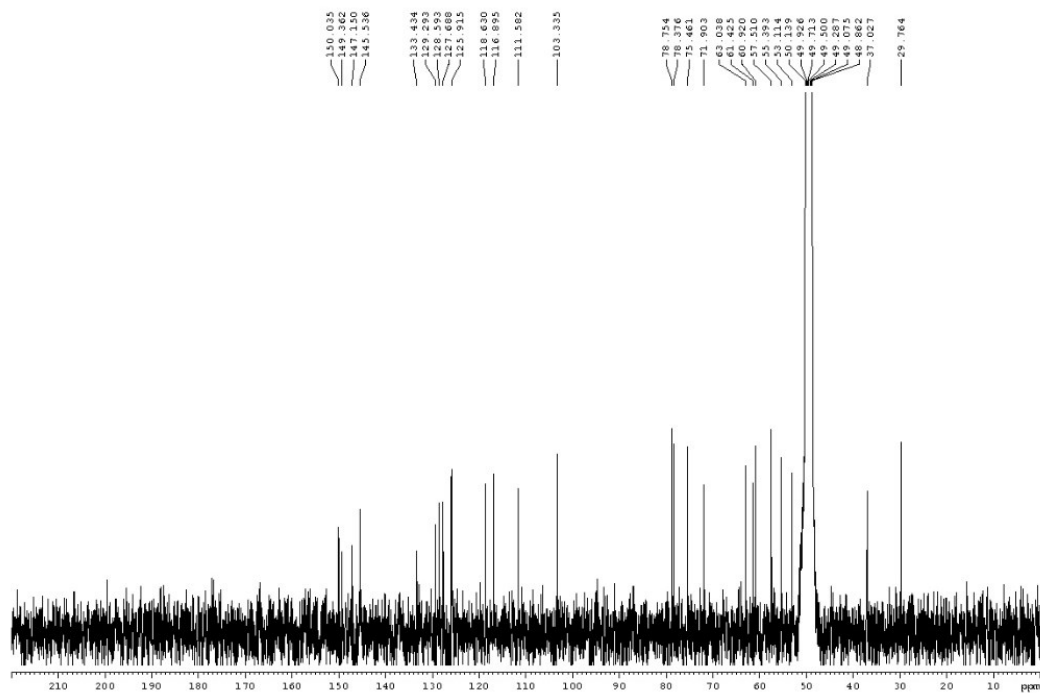

Figure S61. <sup>13</sup>C NMR spectrum (CD<sub>3</sub>OD, 100 MHz) of stephapierrine D (4)

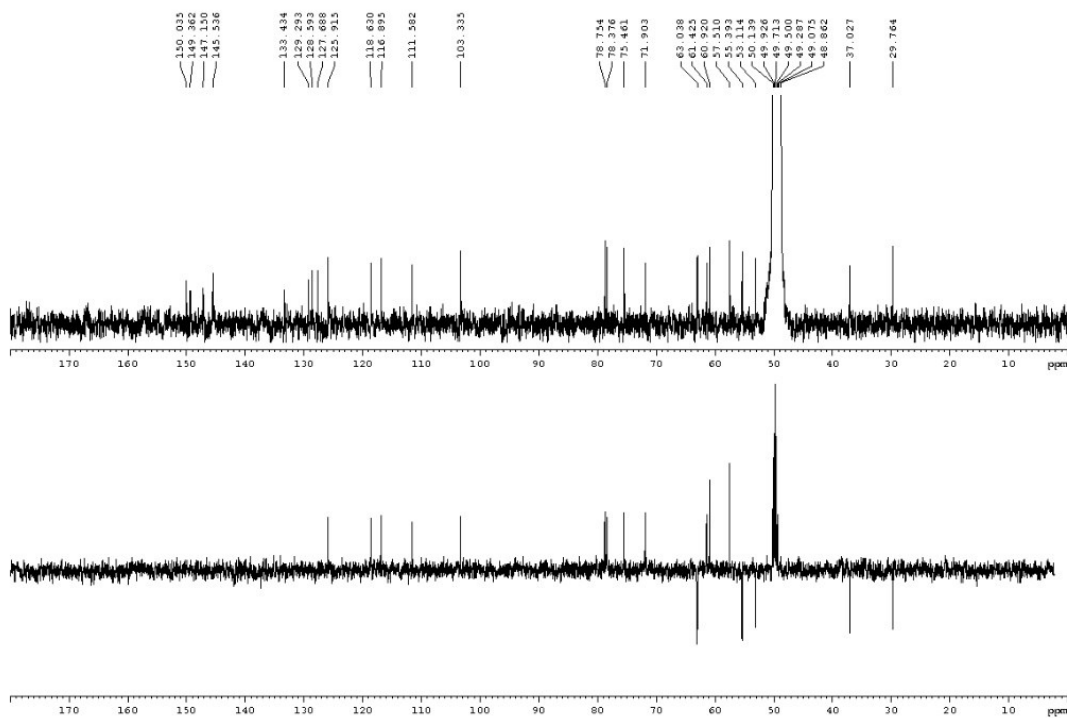

Figure S62. DEPT135 spectrum (CD<sub>3</sub>OD, 100 MHz) of stephapierrine D (4)



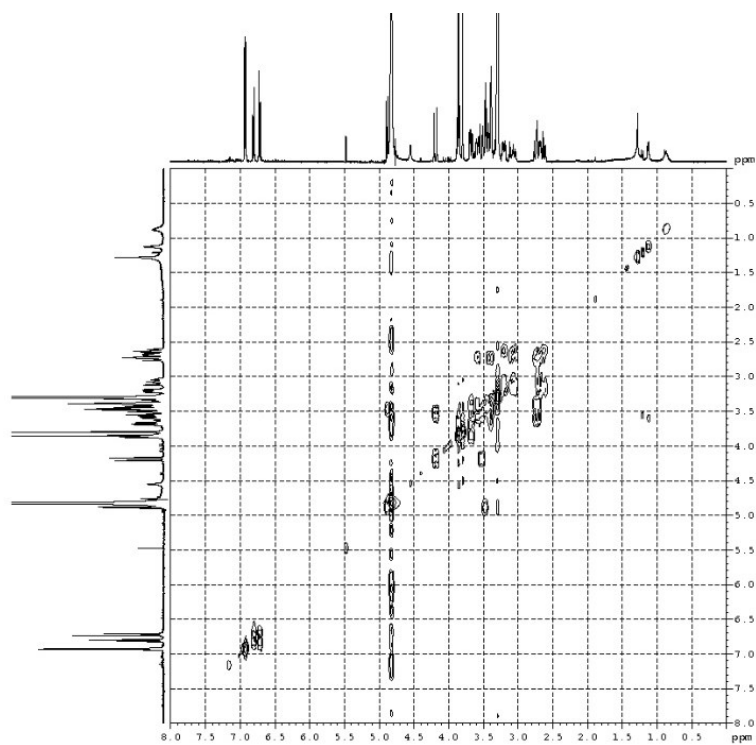

**Figure S63.** COSY spectrum of stephapierrine D (**4**) in CD<sub>3</sub>OD

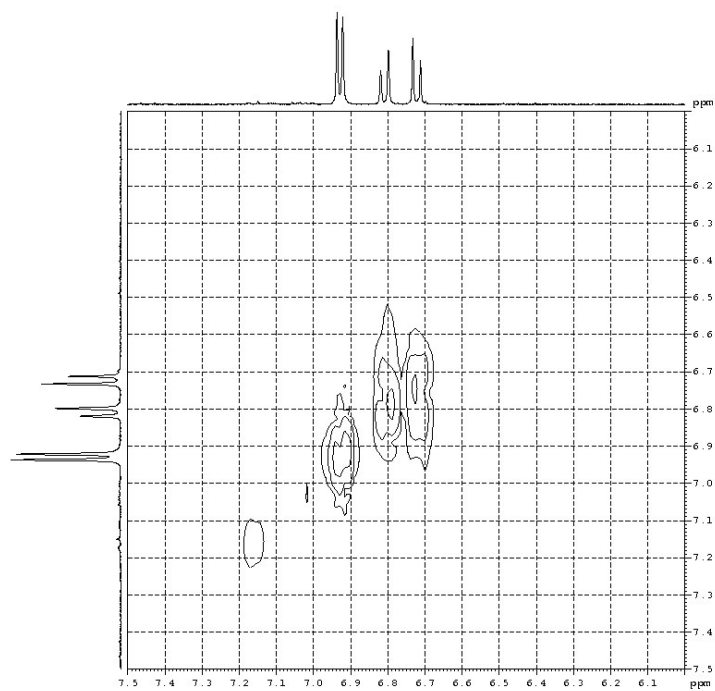

**Figure S64.** Expansion of COSY spectrum of stephapierrine D (**4**) in CD<sub>3</sub>OD (1)

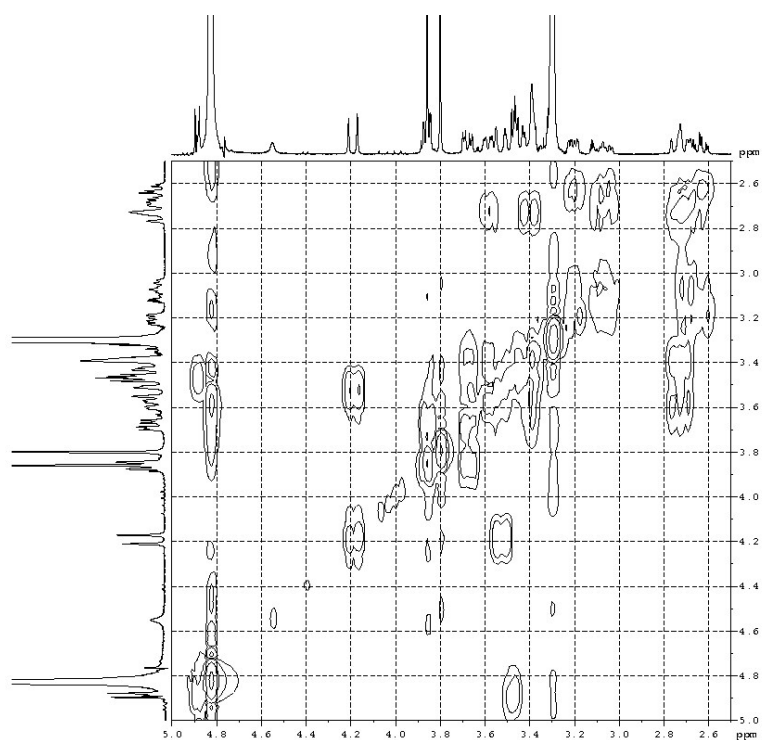

Figure S65. Expansion of COSY spectrum of stephapierrine D (**4**) in CD<sub>3</sub>OD (2)

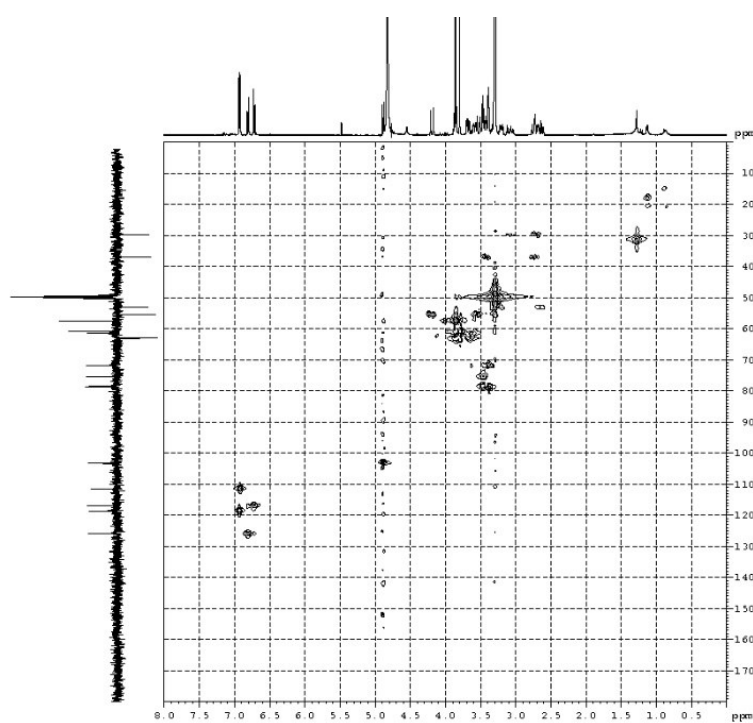

Figure S66. HMQC spectrum of stephapierrine D (**4**) in CD<sub>3</sub>OD

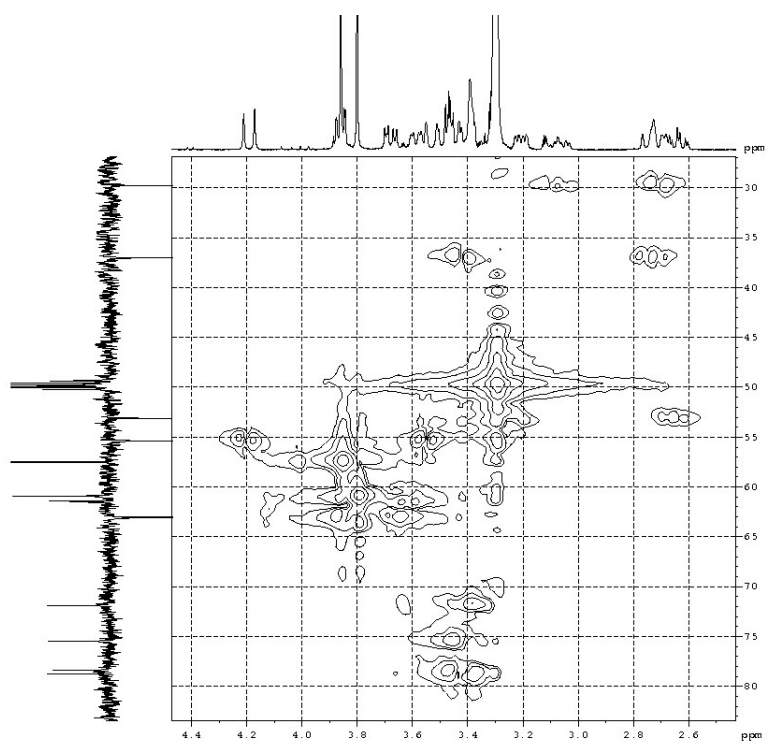

**Figure S67.** Expansion of HMQC spectrum of stephapierrine D (**4**) in CD<sub>3</sub>OD (1)

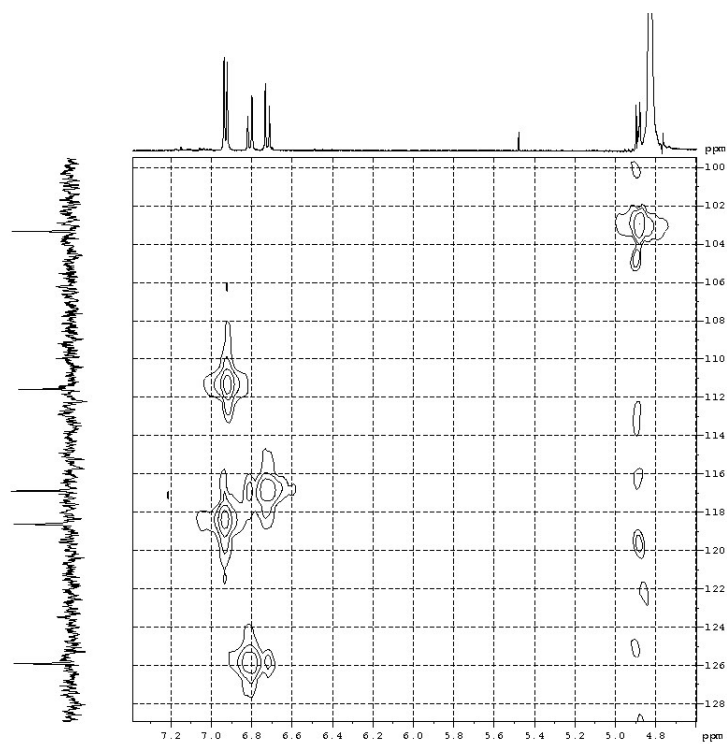

**Figure S68.** Expansion of HMQC spectrum of stephapierrine D (**4**) in CD<sub>3</sub>OD (2)

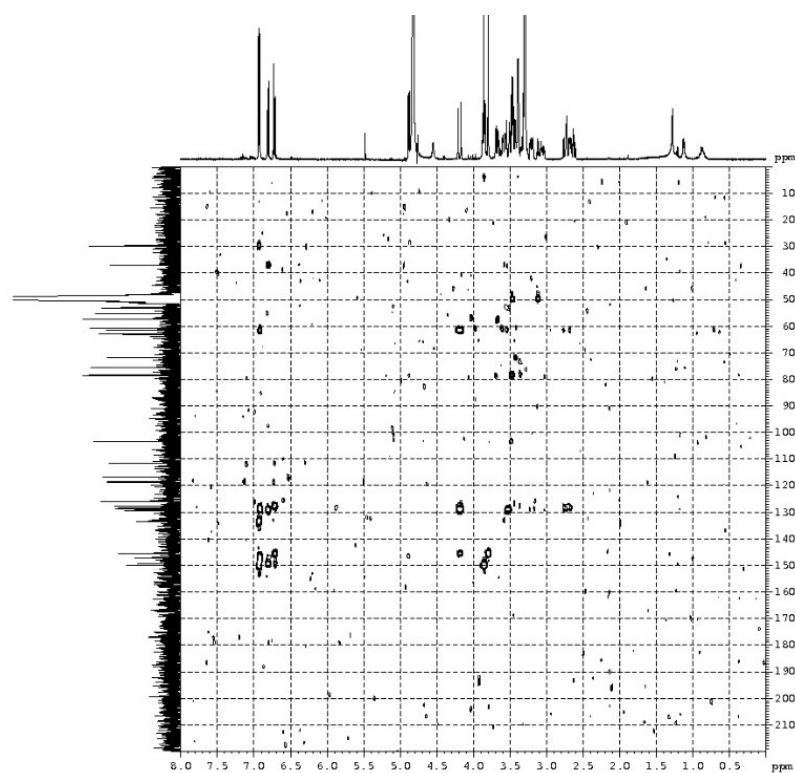

**Figure S69.** HMBC spectrum of stephapierrine D (**4**) in CD<sub>3</sub>OD

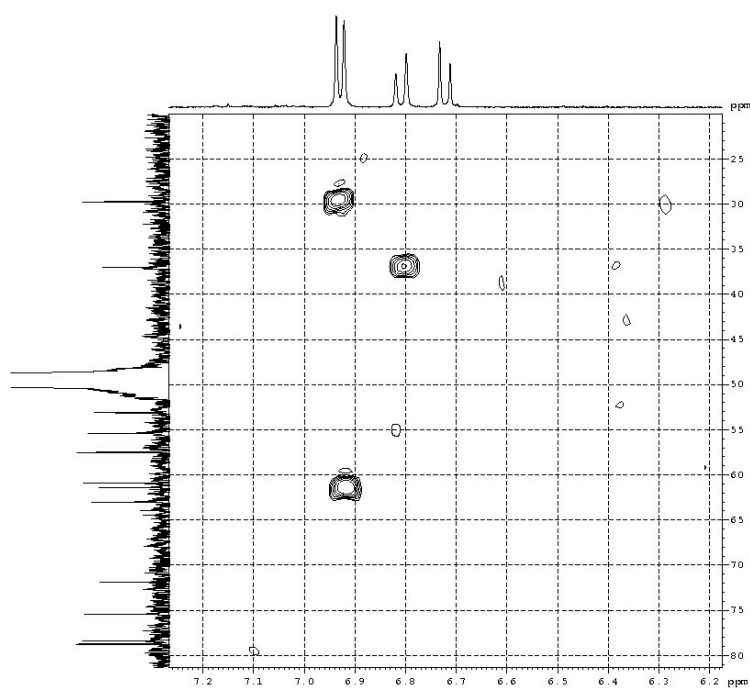

**Figure S70.** Expansion of HMBC spectrum of stephapierrine D (**4**) in CD<sub>3</sub>OD (1)

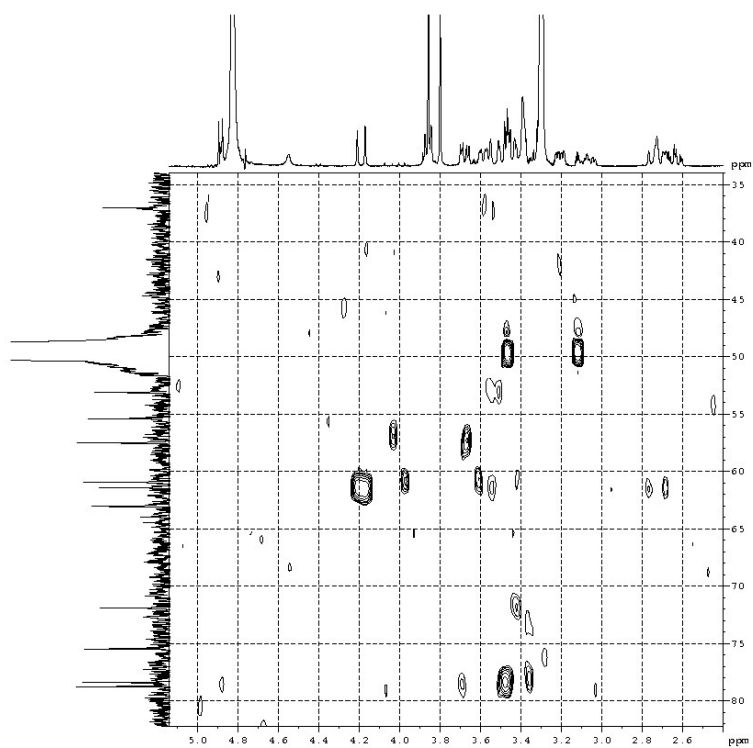

**Figure S71.** Expansion of HMBC spectrum of stephapierrine D (**4**) in CD<sub>3</sub>OD (2)

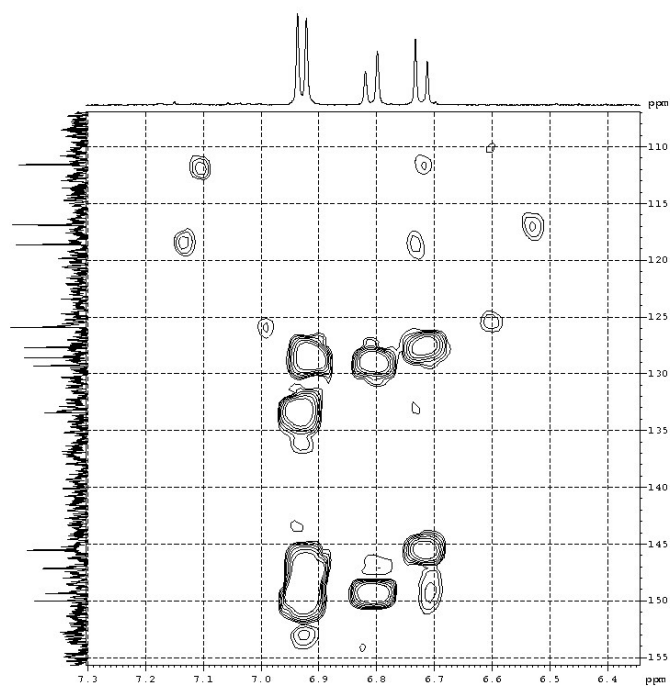

**Figure S72.** Expansion of HMBC spectrum of stephapierrine D (**4**) in CD<sub>3</sub>OD (3)

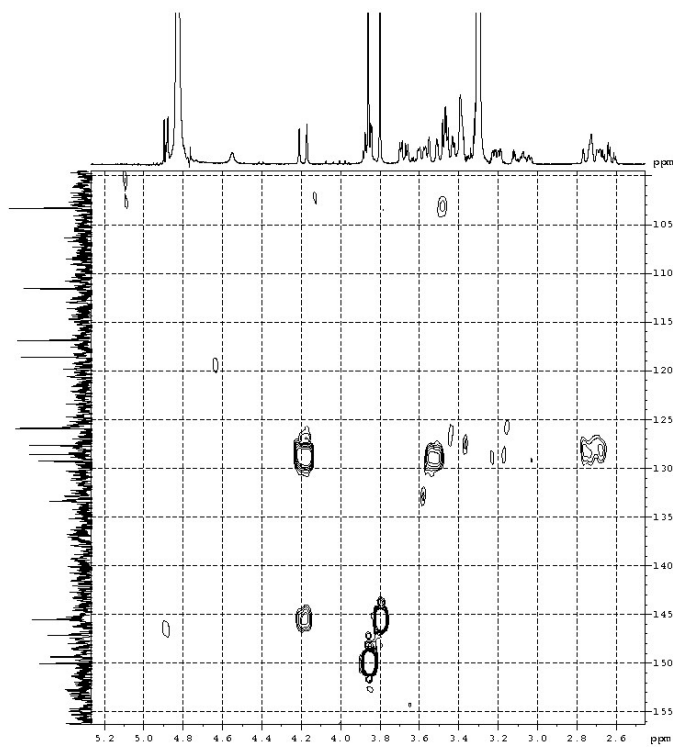

**Figure S73.** Expansion of HMBC spectrum of stephapierrine D (**4**) in CD<sub>3</sub>OD (**4**)

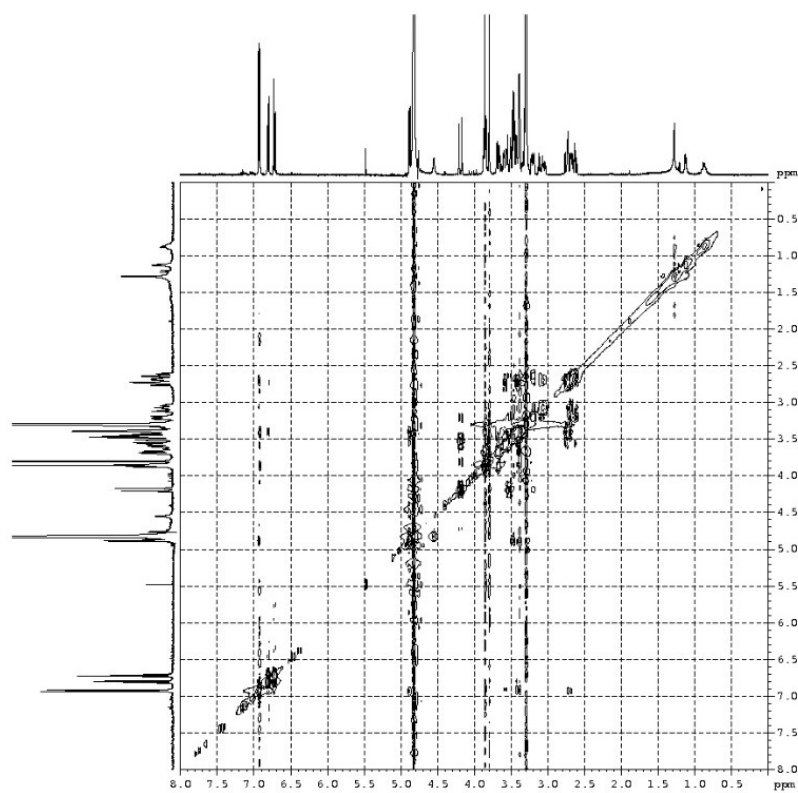

**Figure S74.** NOESY spectrum of stephapierrine D (**4**) in CD<sub>3</sub>OD

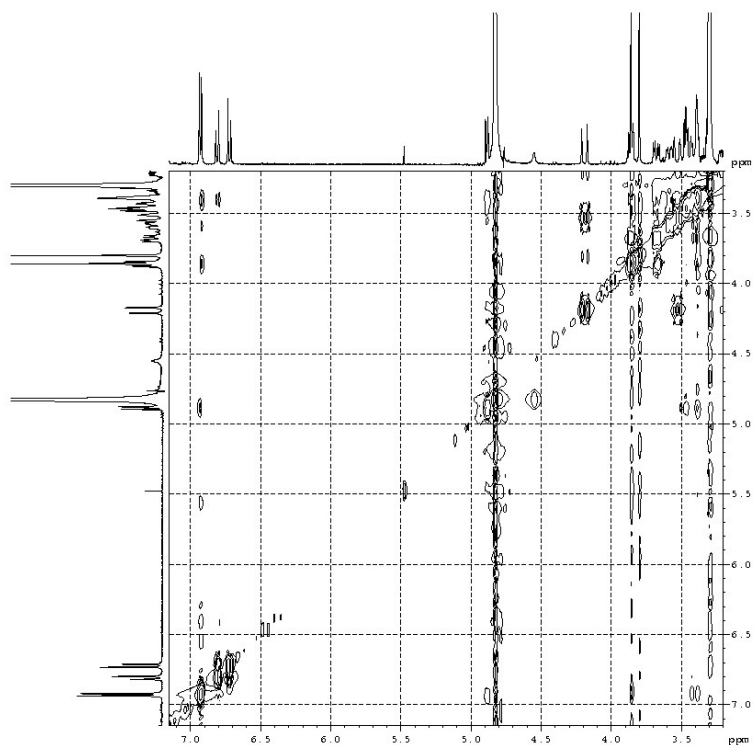

**Figure S75.** Expansion of NOESY spectrum of stephapierrine D (**4**) in CD<sub>3</sub>OD (1)

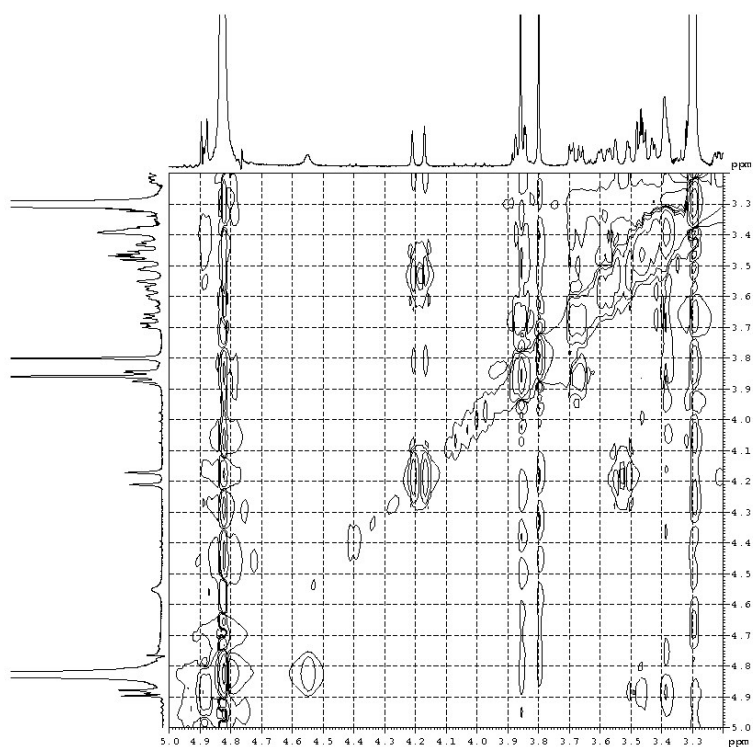

**Figure S76.** Expansion of NOESY spectrum of stephapierrine D (**4**) in CD<sub>3</sub>OD (2)

## Mass Spectrum SmartFormula Report

|                      |                                           |                  |                      |               |
|----------------------|-------------------------------------------|------------------|----------------------|---------------|
| <b>Analysis Info</b> |                                           | Acquisition Date | 12/7/2020 3:02:12 PM |               |
| Analysis Name        | D:\Data\Apichart\ESI\AS-HRMS 1244 (pos).d | Operator         | RU                   |               |
| Method               | tune_wide-RU.m                            | Instrument       | micrOTOF             | 8213750.10411 |
| Sample Name          | AS-RU 19500                               | Comment          |                      |               |

|                              |            |                      |          |                  |           |
|------------------------------|------------|----------------------|----------|------------------|-----------|
| <b>Acquisition Parameter</b> |            |                      |          |                  |           |
| Source Type                  | ESI        | Ion Polarity         | Positive | Set Nebulizer    | 0.3 Bar   |
| Focus                        | Not active |                      |          | Set Dry Heater   | 180 °C    |
| Scan Begin                   | 100 m/z    | Set Capillary        | 4500 V   | Set Dry Gas      | 4.0 l/min |
| Scan End                     | 4000 m/z   | Set End Plate Offset | -500 V   | Set Divert Valve | Waste     |

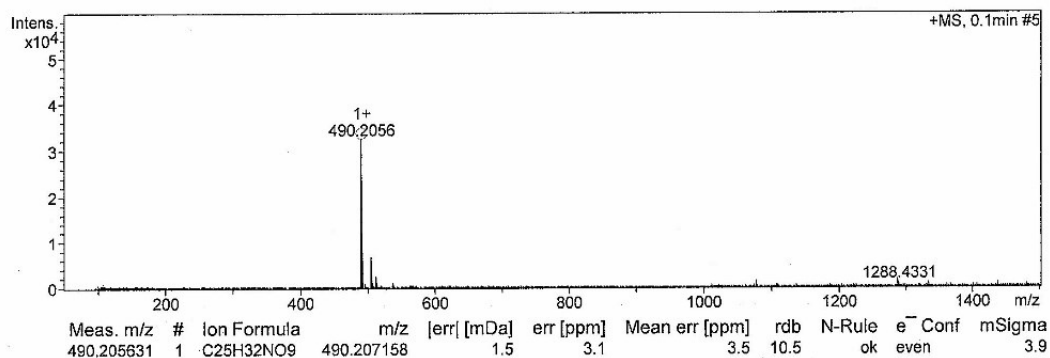

**Figure S77.** ESI-TOF-MS of stephapierrine D (4)

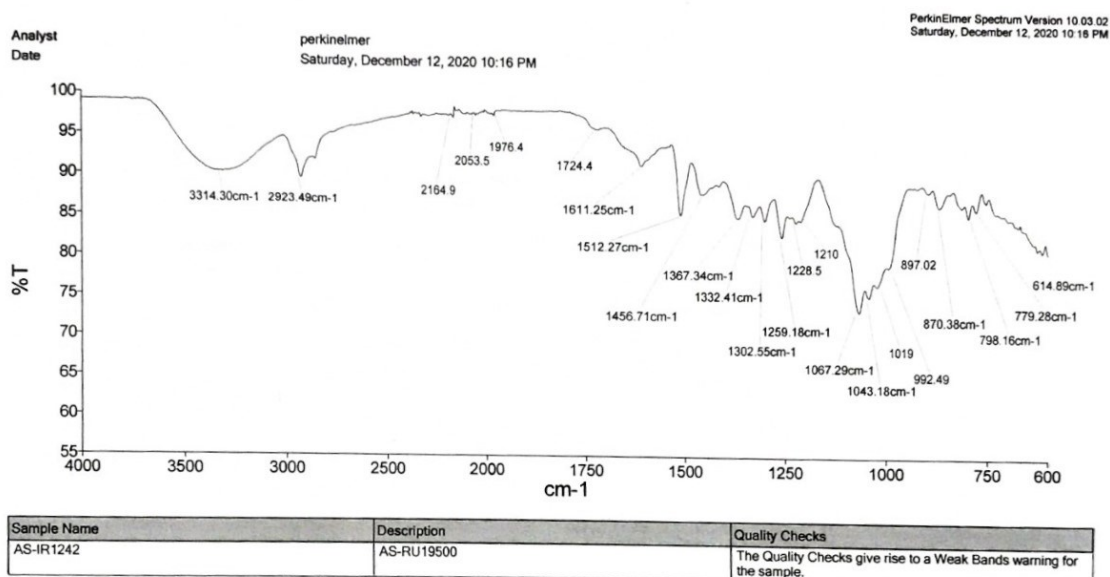

**Figure S78.** IR spectrum of stephapierrine D (4)



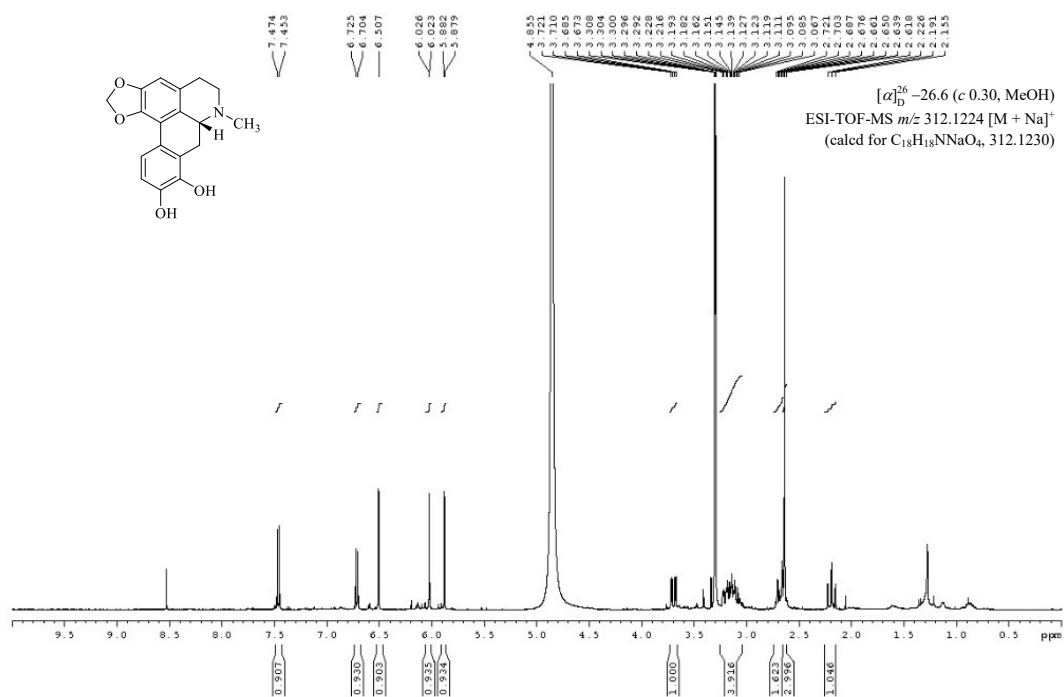

Figure S79.  $^1\text{H}$  NMR spectrum ( $\text{CD}_3\text{OD}$ , 400 MHz) of stephapierrine E (5)

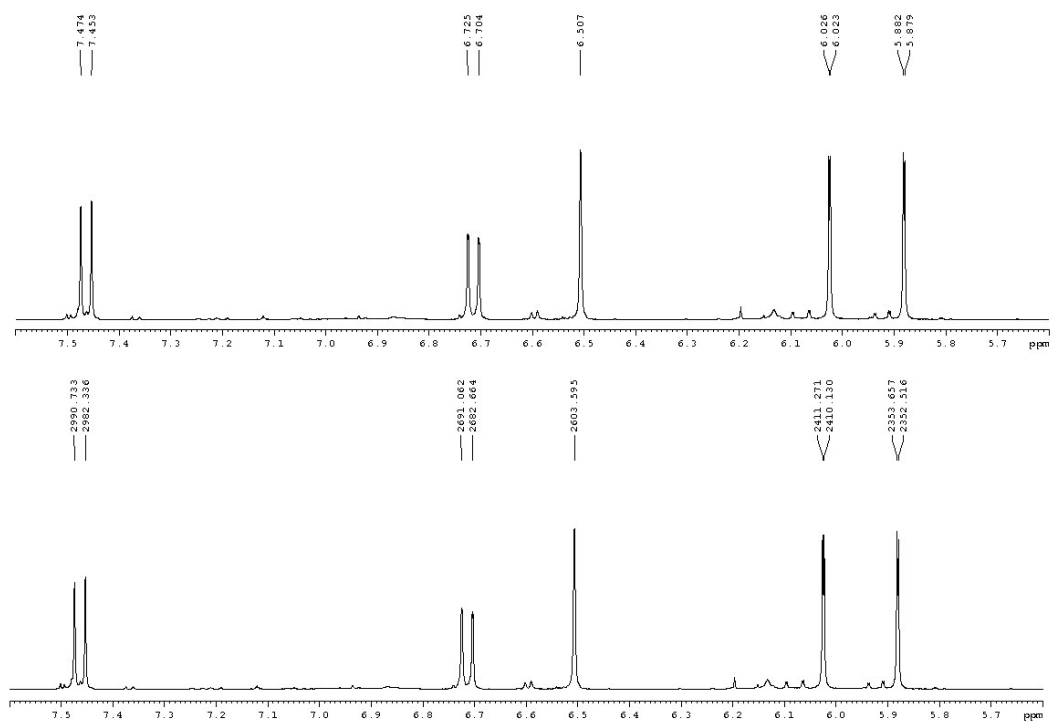

Figure S80. Expansion of  $^1\text{H}$  NMR spectrum ( $\text{CD}_3\text{OD}$ , 400 MHz) of stephapierrine E (5) (1)

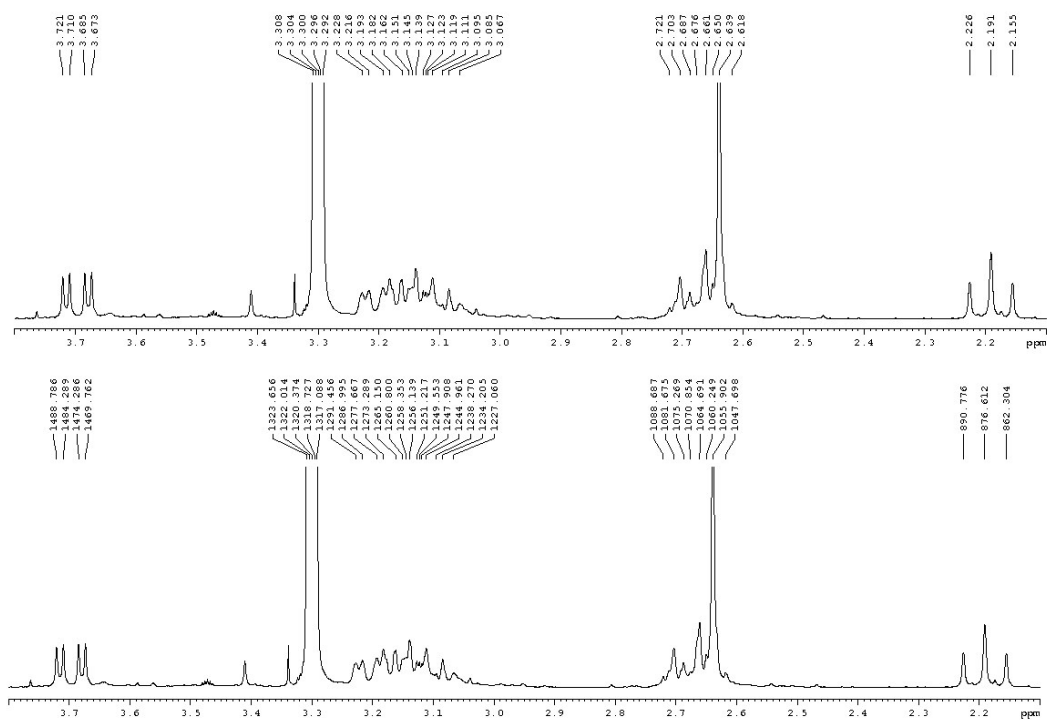

**Figure S81.** Expansion of  $^1\text{H}$  NMR spectrum ( $\text{CD}_3\text{OD}$ , 400 MHz) of stephapierrine E (**5**) (2)

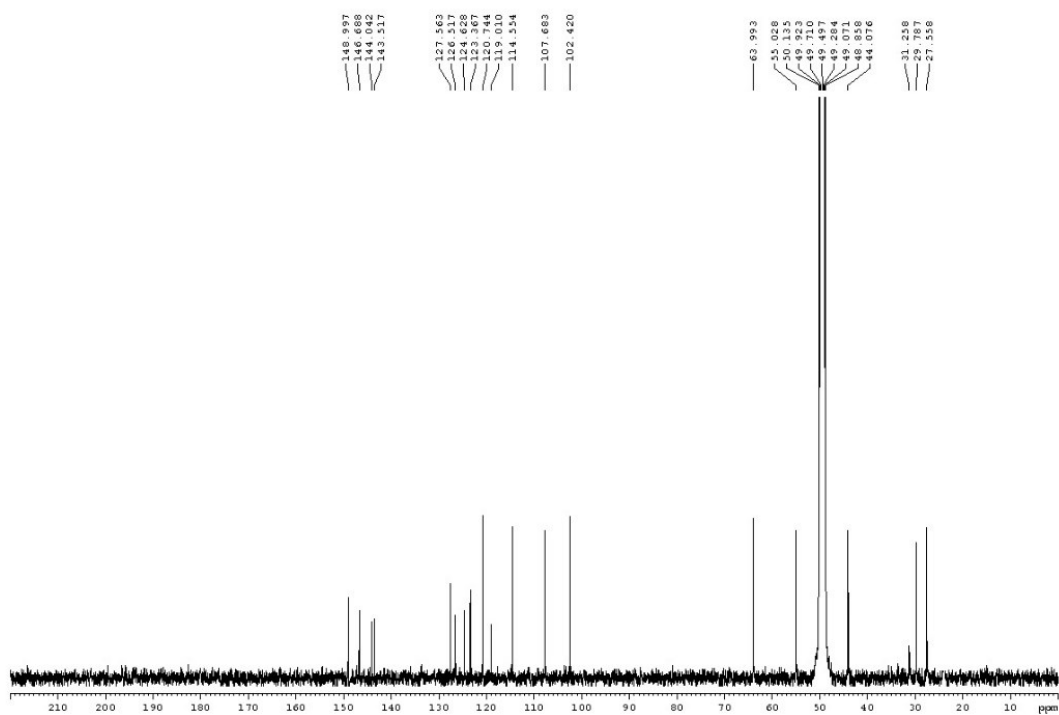

**Figure S82.**  $^{13}\text{C}$  NMR spectrum ( $\text{CD}_3\text{OD}$ , 100 MHz) of stephapierrine E (**5**)

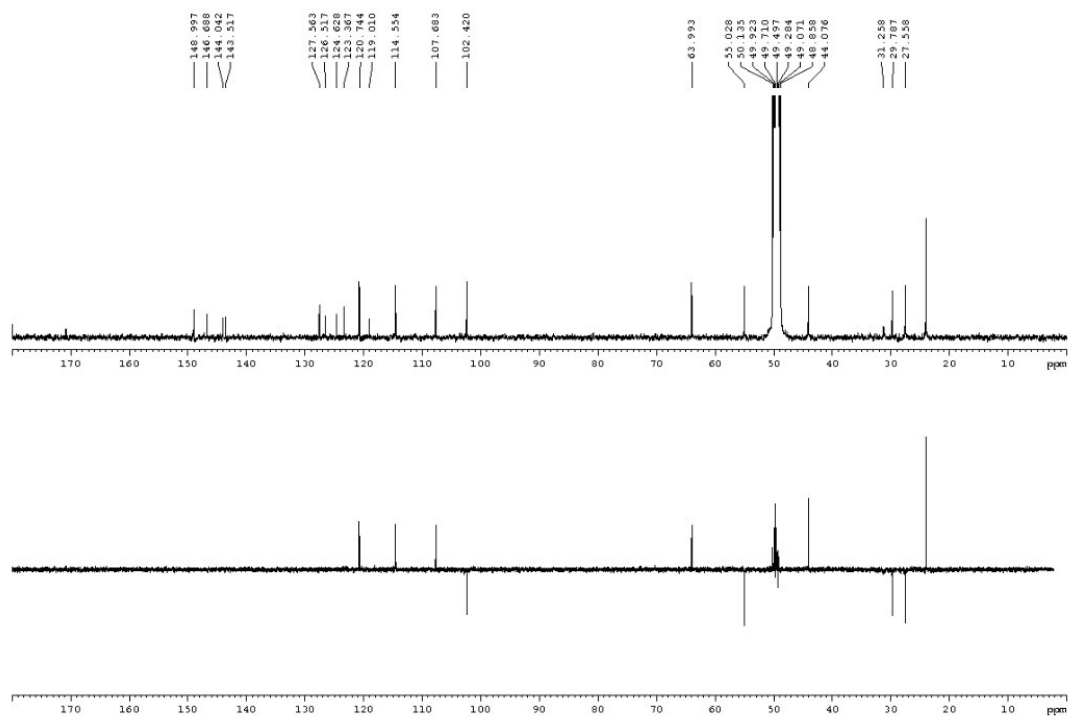

**Figure S83.** DEPT135 spectrum ( $\text{CD}_3\text{OD}$ , 100 MHz) of stephapierrine E (**5**)

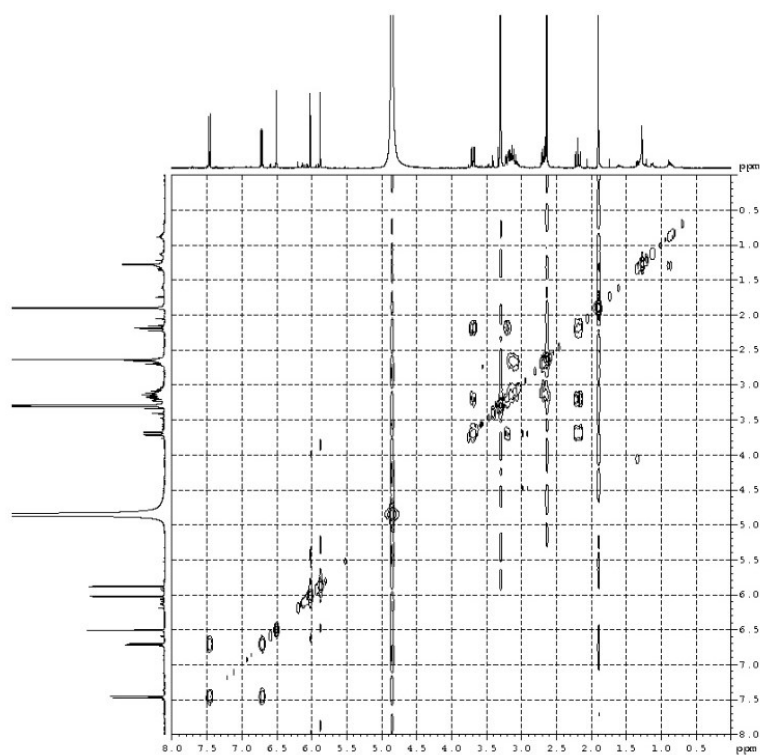

**Figure S84.** COSY spectrum of stephapierrine E (**5**) in  $\text{CD}_3\text{OD}$

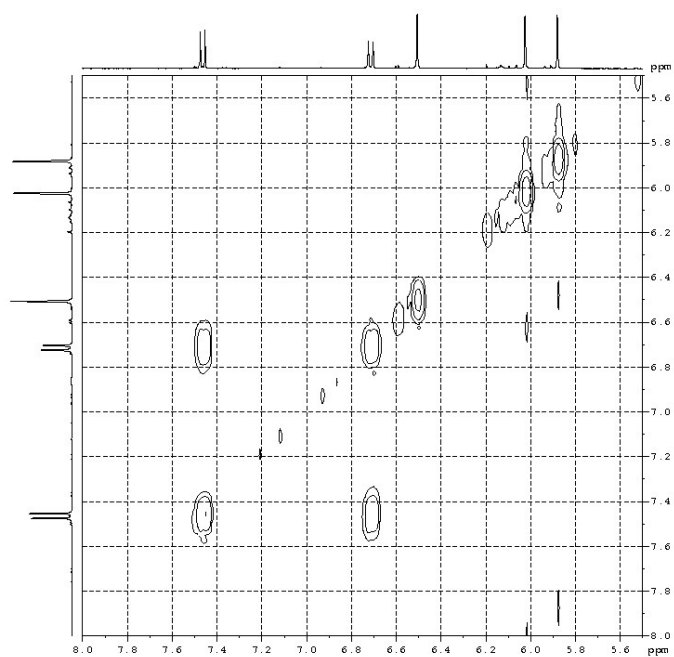

**Figure S85.** Expansion of COSY spectrum of stephapierrine E (**5**) in CD<sub>3</sub>OD (1)

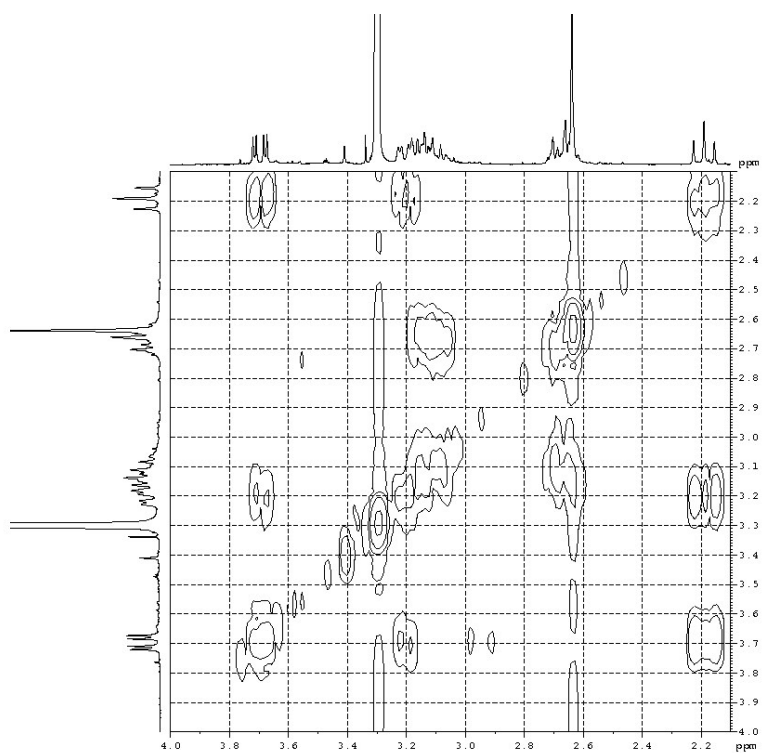

**Figure S86.** Expansion of COSY spectrum of stephapierrine E (**5**) in CD<sub>3</sub>OD (2)

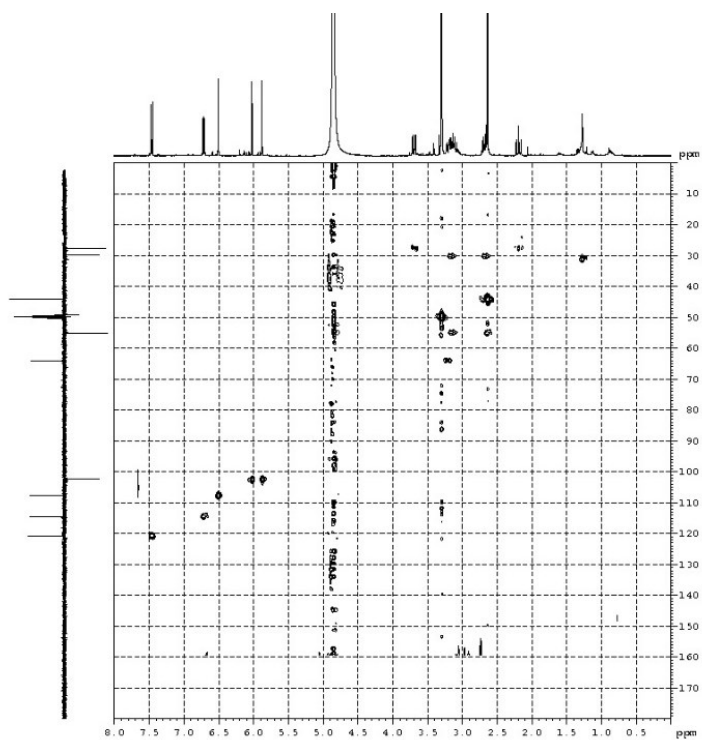

Figure S87. HMQC spectrum of stephapierrine E (**5**) in CD<sub>3</sub>OD

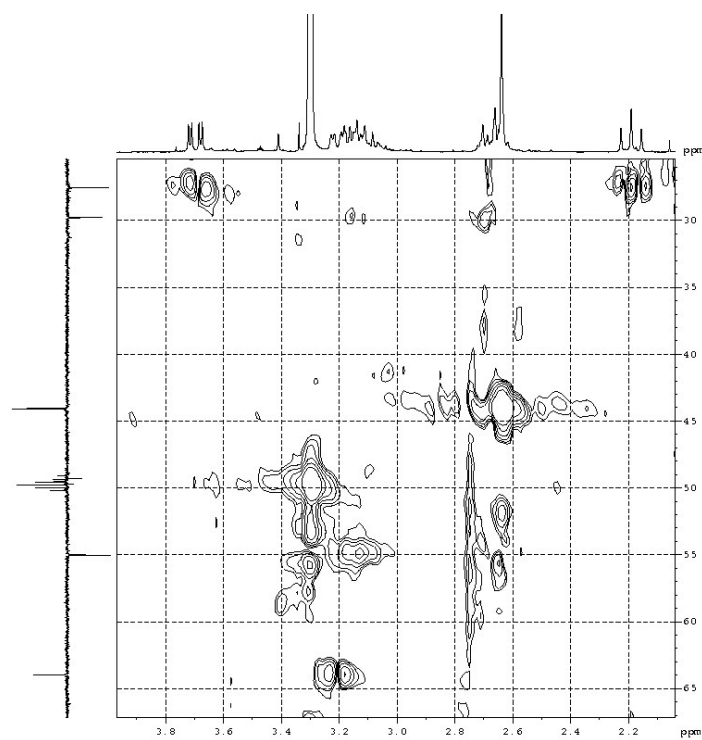

Figure S88. Expansion of HMQC spectrum of stephapierrine E (**5**) in CD<sub>3</sub>OD (1)

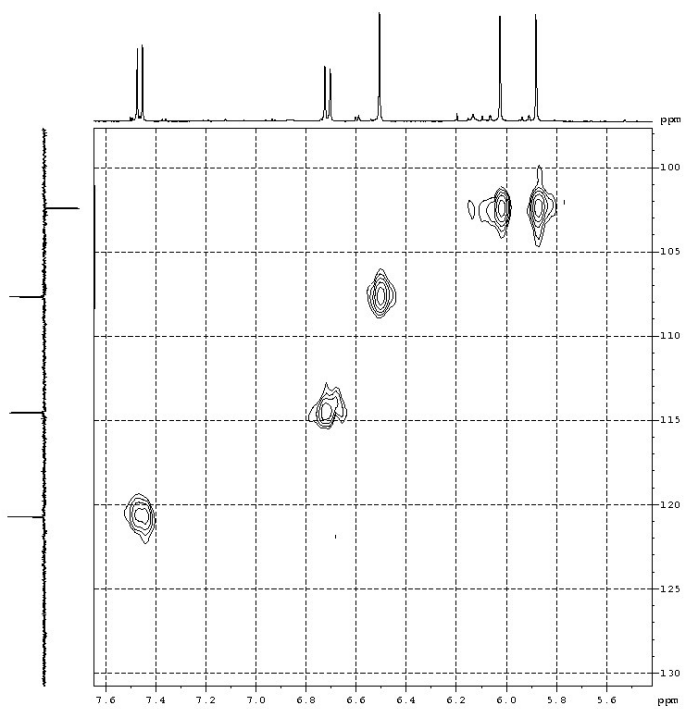

**Figure S89.** Expansion of HMQC spectrum of stephapierrine E (**5**) in CD<sub>3</sub>OD (2)

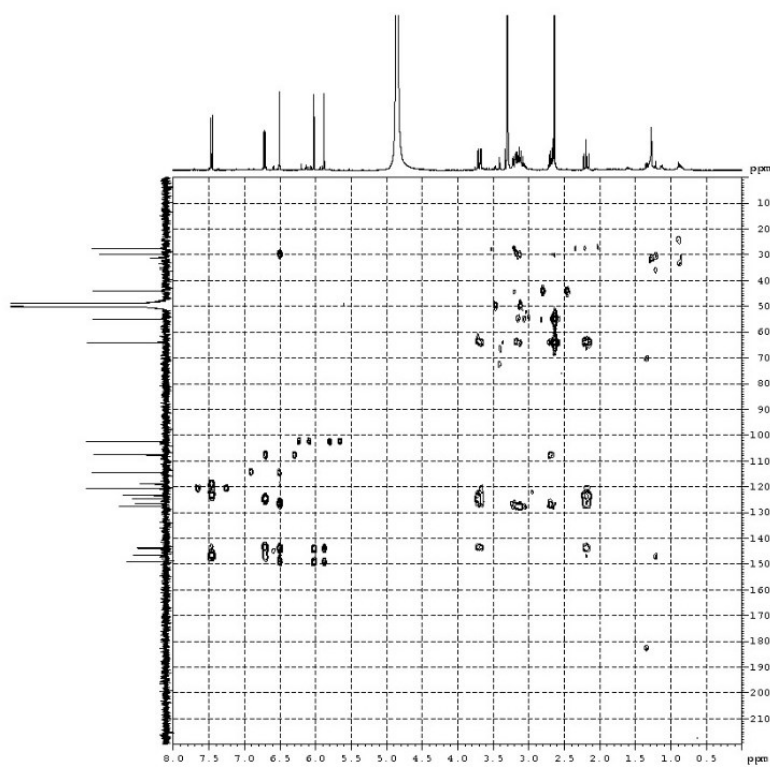

**Figure S90.** HMBC spectrum of stephapierrine E (**5**) in CD<sub>3</sub>OD

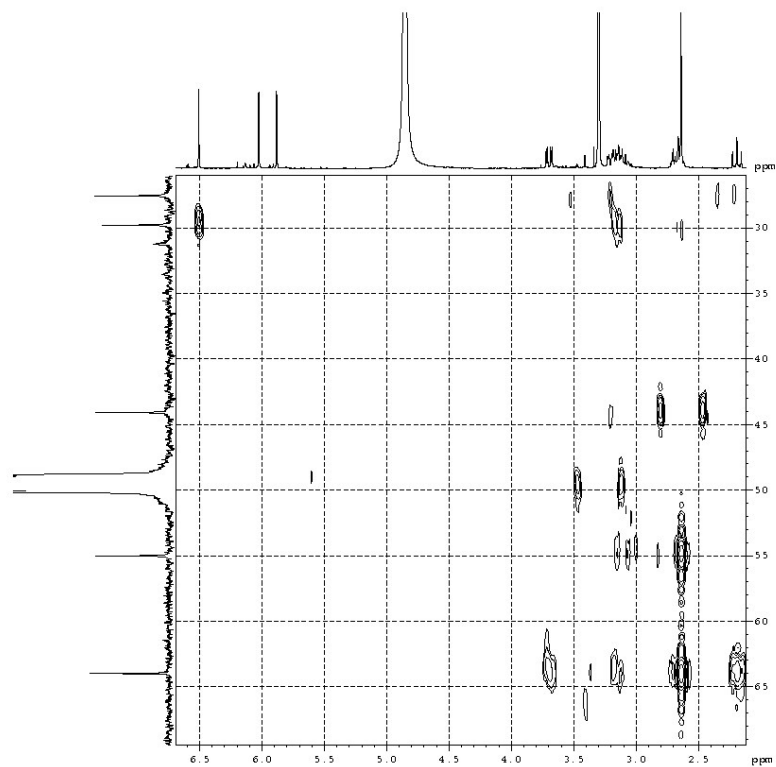

**Figure S91.** Expansion of HMBC spectrum of stephapierrine E (**5**) in CD<sub>3</sub>OD (1)

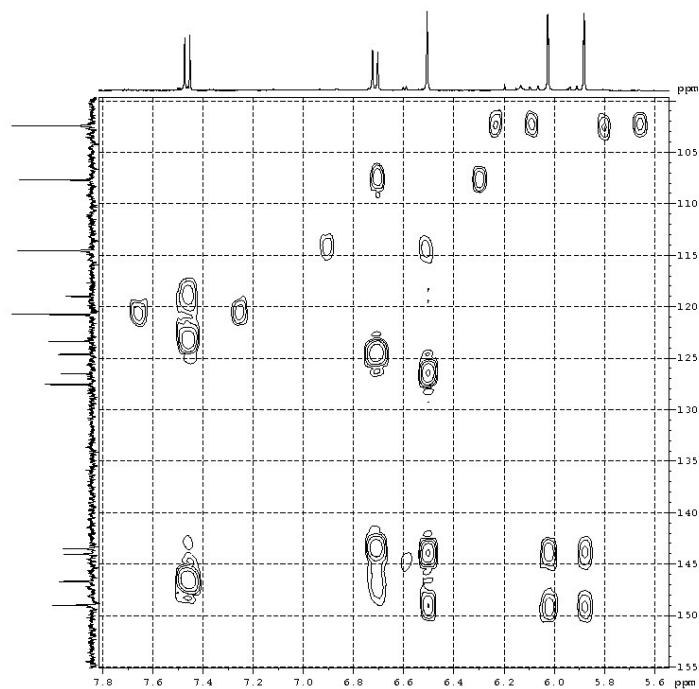

**Figure S92.** Expansion of HMBC spectrum of stephapierrine E (**5**) in CD<sub>3</sub>OD (2)

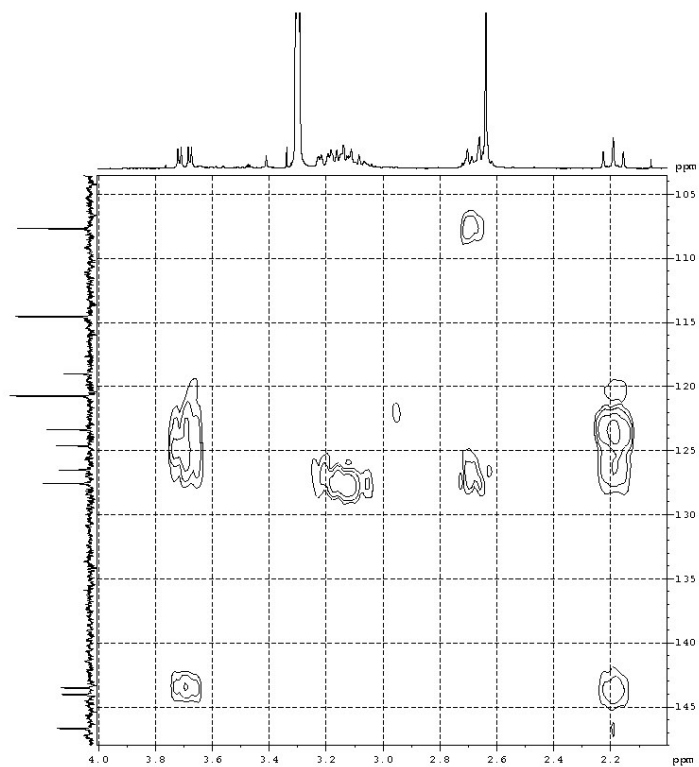

**Figure S93.** Expansion of HMBC spectrum of stephapierrine E (**5**) in CD<sub>3</sub>OD (**3**)

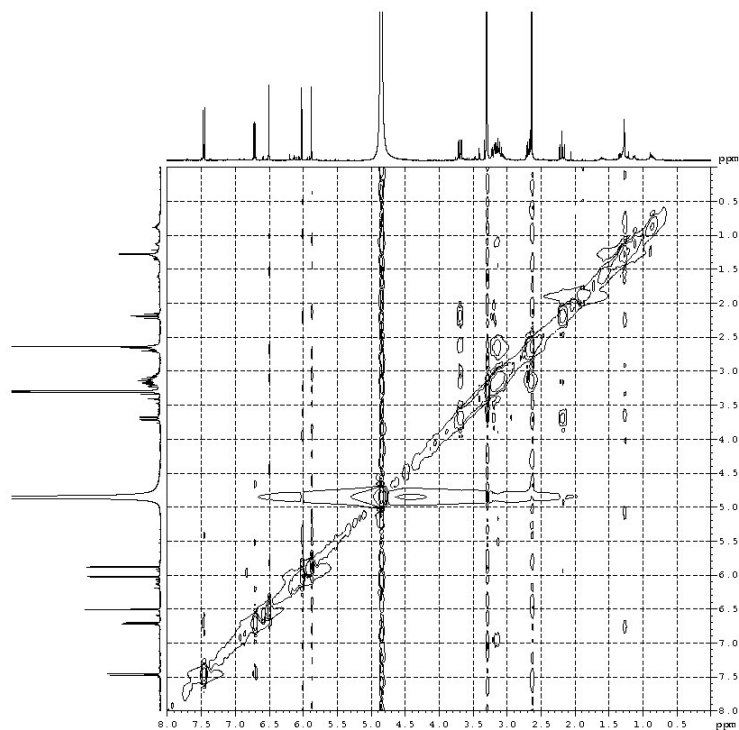

**Figure S94.** NOESY spectrum of stephapierrine E (**5**) in CD<sub>3</sub>OD



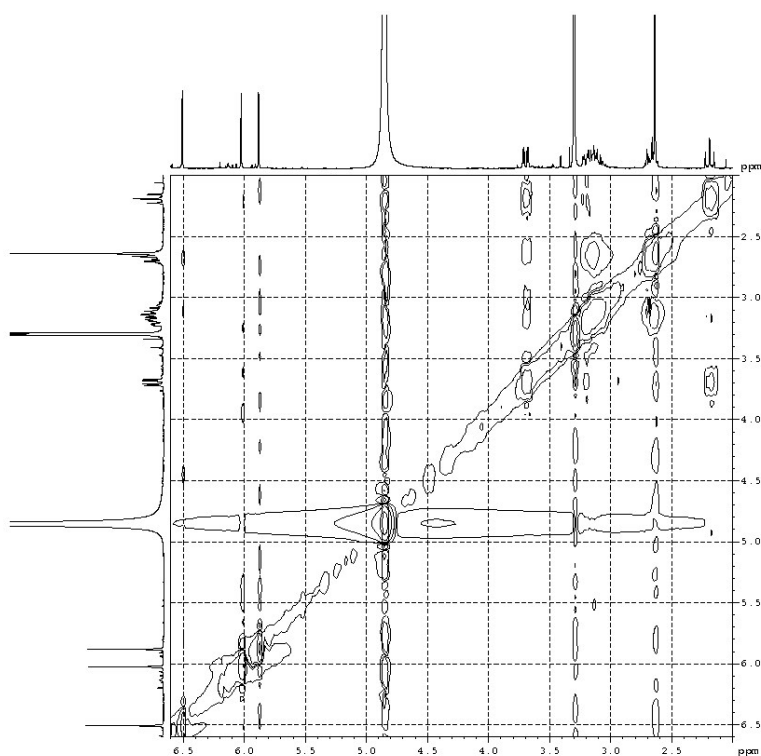

**Figure S95.** Expansion of NOESY spectrum of stephapierrine E (5) in CD<sub>3</sub>OD

### Mass Spectrum SmartFormula Report

| Analysis Info         |                                           | Acquisition Date     |          | 12/7/2020 3:58:43 PM |                        |
|-----------------------|-------------------------------------------|----------------------|----------|----------------------|------------------------|
| Analysis Name         | D:\Data\Apichart\ESI\AS-HRMS 1278 (pos).d | Operator             | RU       | Instrument           | micrOTOF 8213760.10411 |
| Method                | tune_wide-RU.m                            |                      |          |                      |                        |
| Sample Name           | AS-RU 19308                               |                      |          |                      |                        |
| Comment               |                                           |                      |          |                      |                        |
| Acquisition Parameter |                                           |                      |          |                      |                        |
| Source Type           | ESI                                       | Ion Polarity         | Positive | Set Nebulizer        | 0.3 Bar                |
| Focus                 | Not active                                |                      |          | Set Dry Heater       | 180 °C                 |
| Scan Begin            | 100 m/z                                   | Set Capillary        | 4500 V   | Set Dry Gas          | 4.0 l/min              |
| Scan End              | 4000 m/z                                  | Set End Plate Offset | -500 V   | Set Divert Valve     | Waste                  |

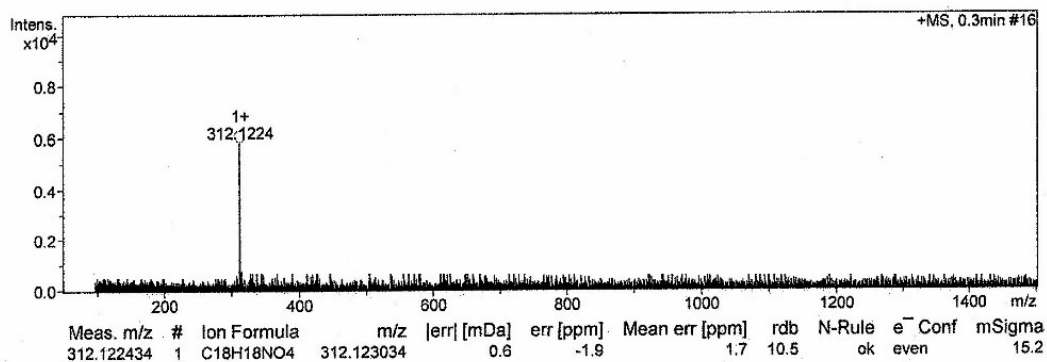

**Figure S96.** ESI-TOF-MS of stephapierrine E (5)



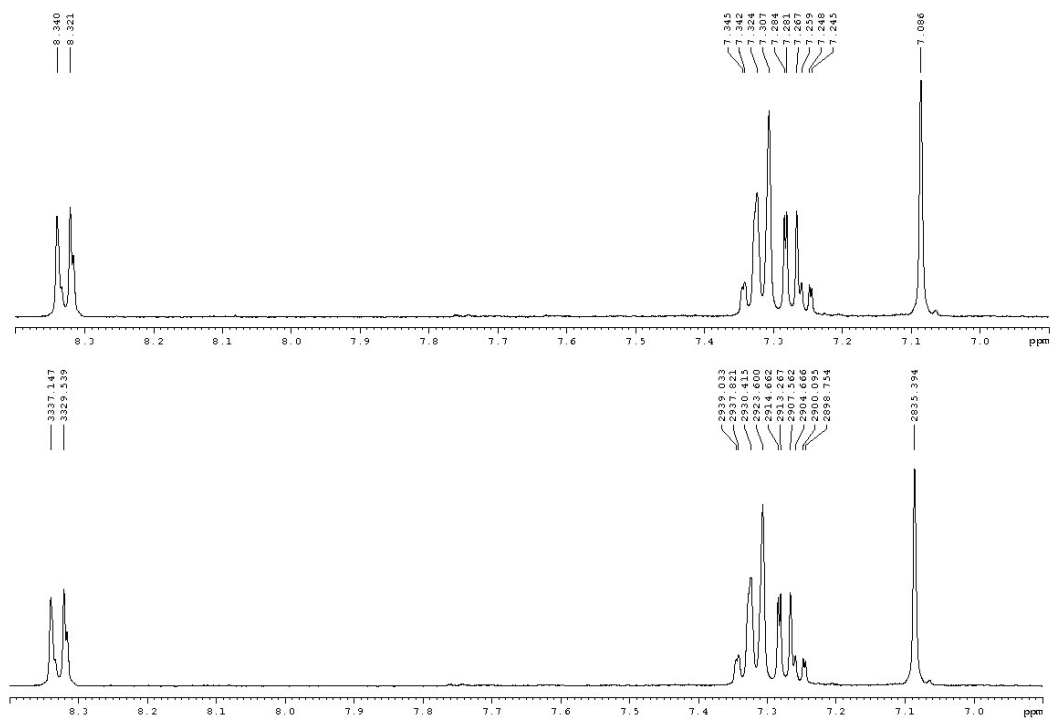

Figure S99. Expansion of  $^1\text{H}$  NMR spectrum (CD<sub>3</sub>OD, 400 MHz) of stephapierrine F (6) (1)

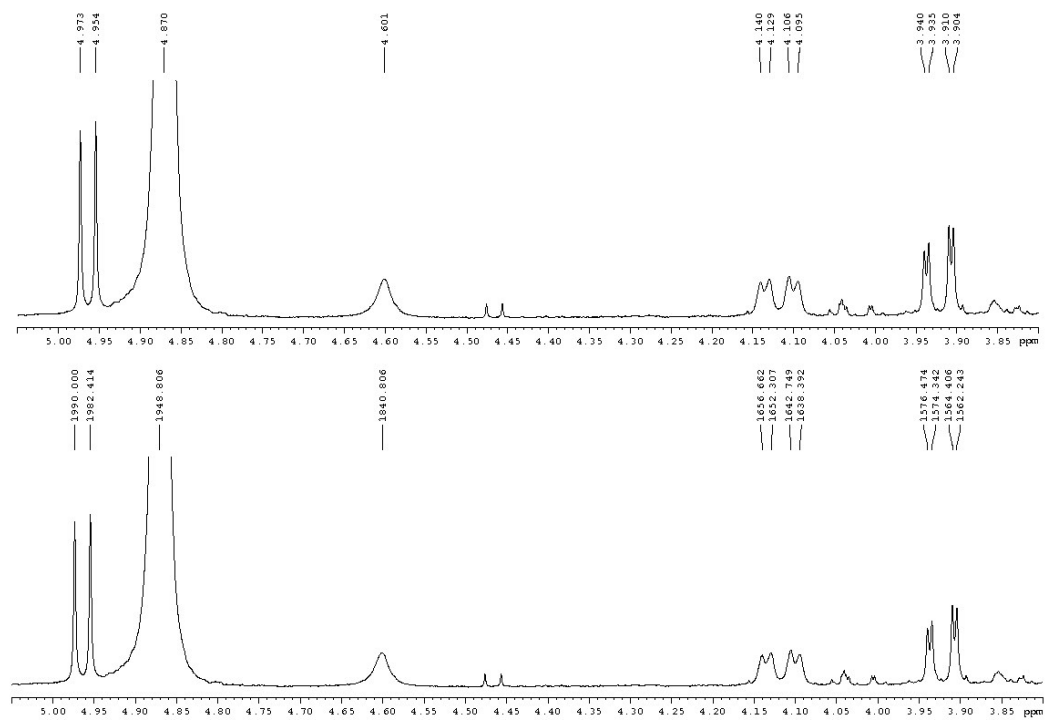

Figure S100. Expansion of  $^1\text{H}$  NMR spectrum (CD<sub>3</sub>OD, 400 MHz) of stephapierrine F (6) (2)

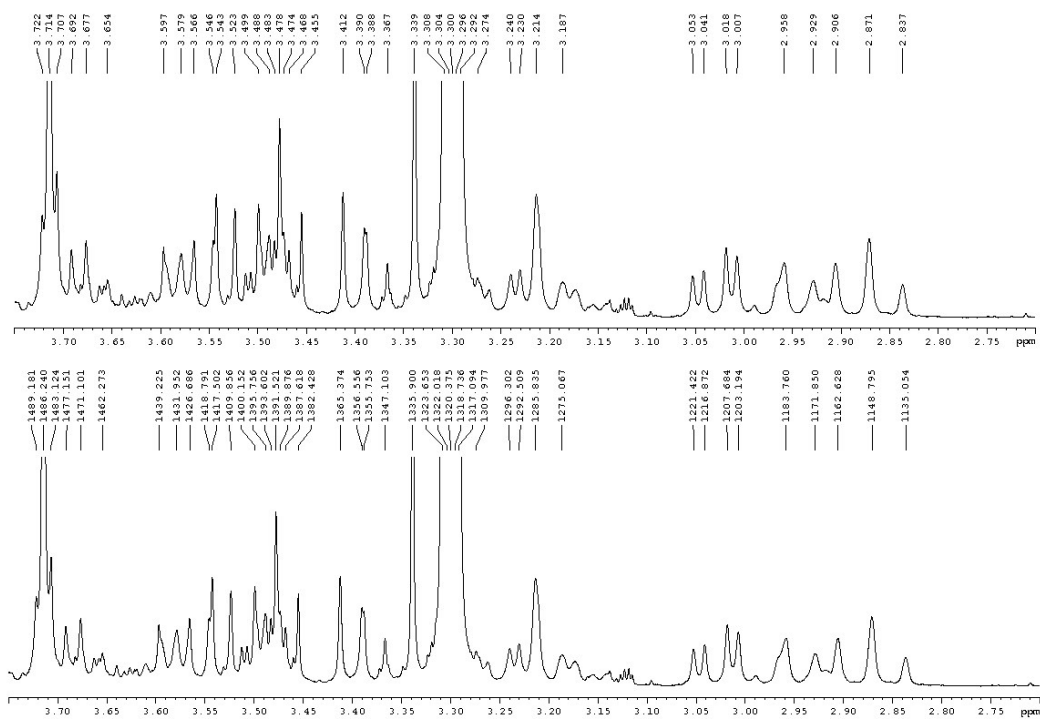

**Figure S101.** Expansion of  $^1\text{H}$  NMR spectrum ( $\text{CD}_3\text{OD}$ , 400 MHz) of stephapierrine F (**6**) (3)

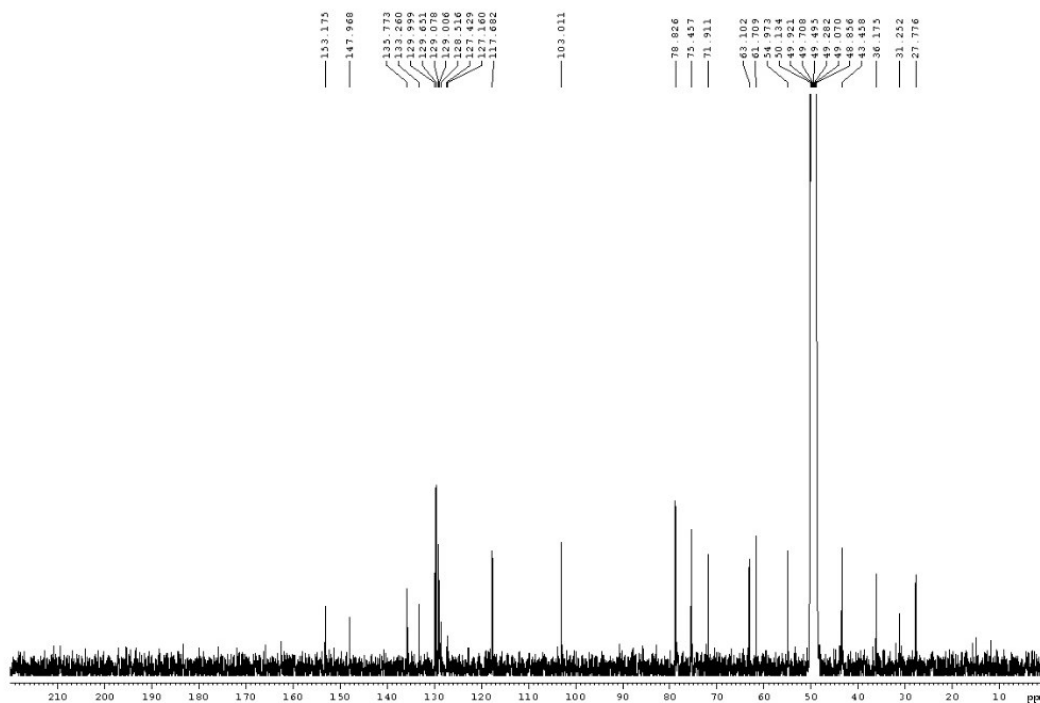

**Figure S102.**  $^{13}\text{C}$  NMR spectrum ( $\text{CD}_3\text{OD}$ , 100 MHz) of stephapierrine F (**6**)

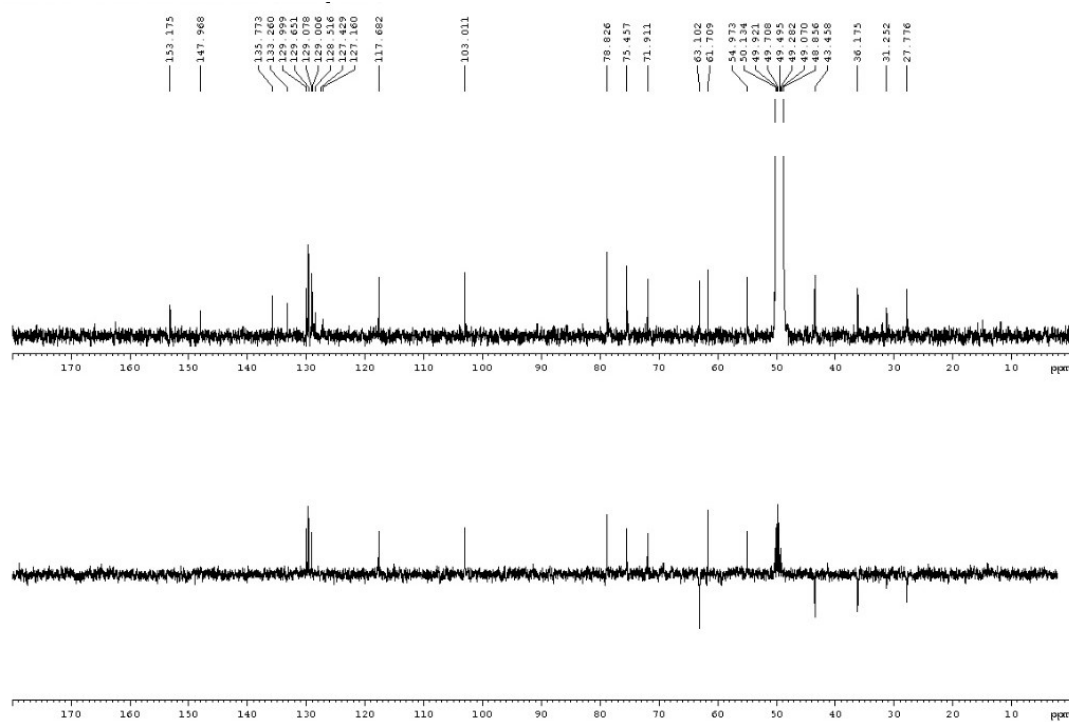

Figure S103. DEPT135 spectrum (CD<sub>3</sub>OD, 100 MHz) of stephapierrine F (6)

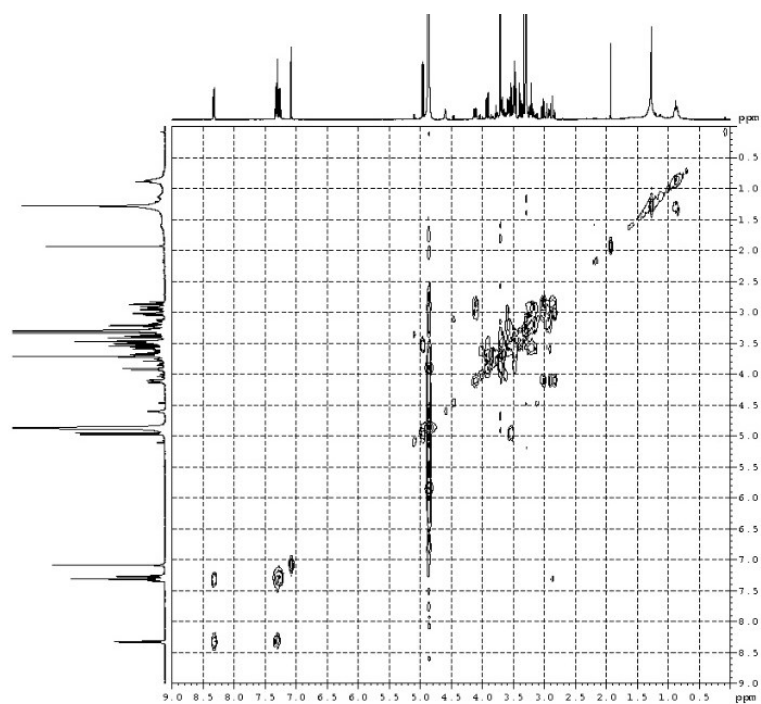

Figure S104. COSY spectrum of stephapierrine F (6) in CD<sub>3</sub>OD

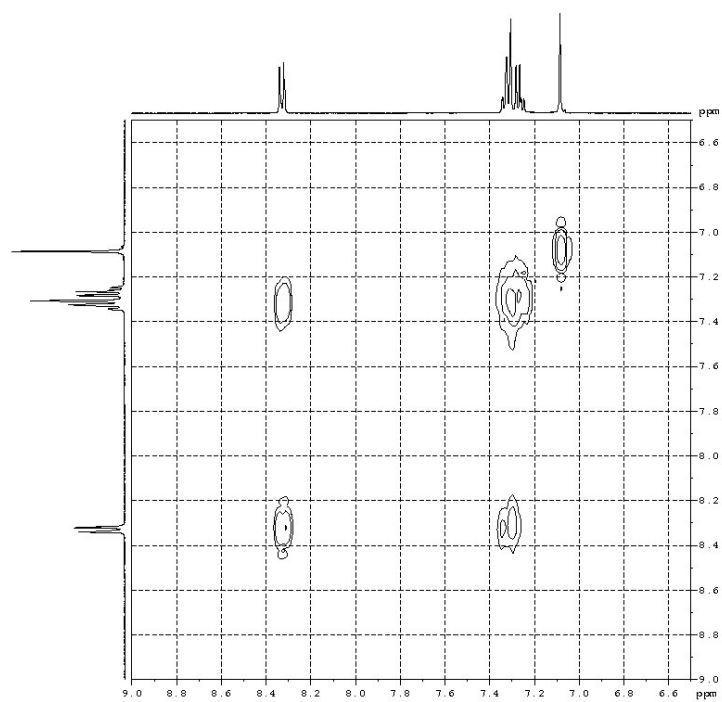

**Figure S105.** Expansion of COSY spectrum of stephapierrine F (**6**) in CD<sub>3</sub>OD (1)

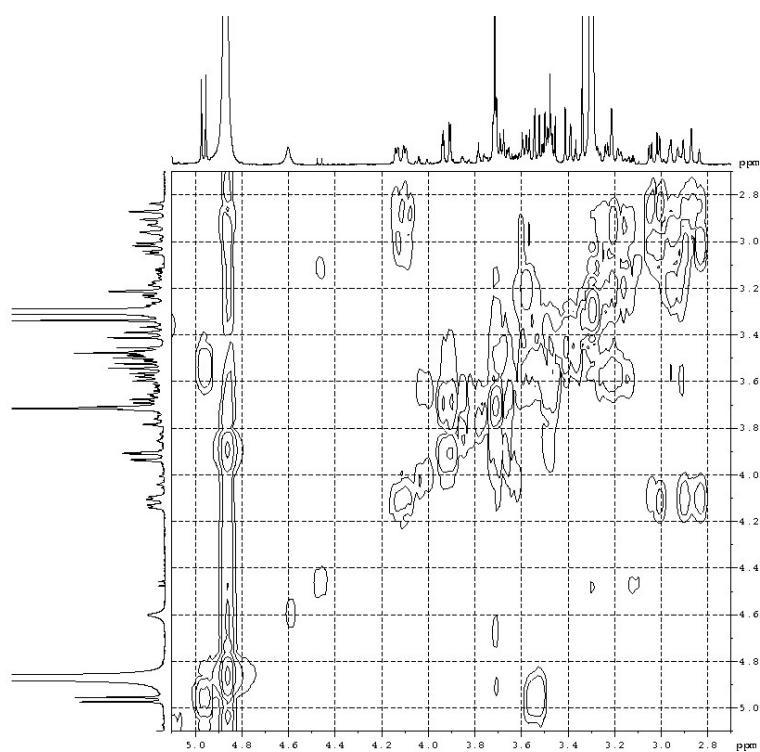

**Figure S106.** Expansion of COSY spectrum of stephapierrine F (**6**) in CD<sub>3</sub>OD (2)

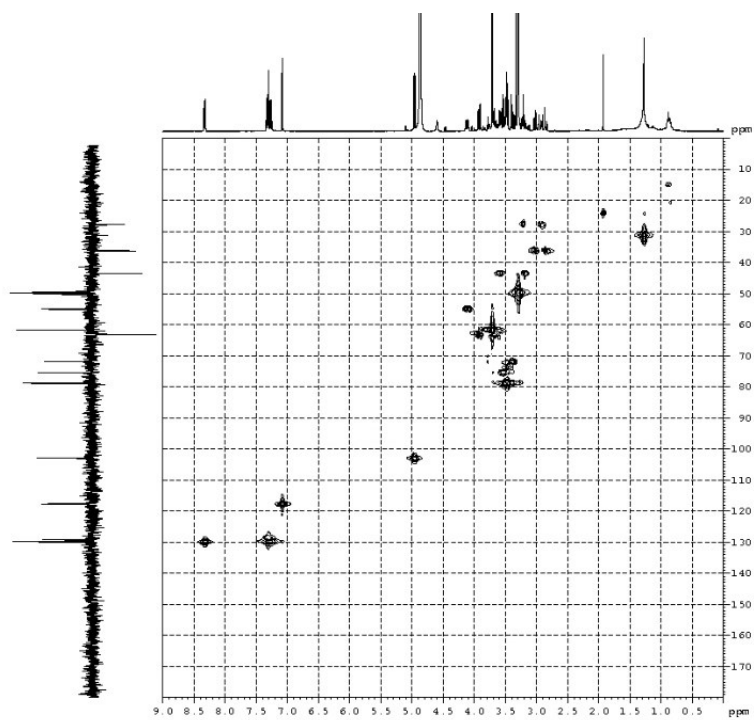

Figure S107. HMQC spectrum of stephapierrine F (6) in CD<sub>3</sub>OD

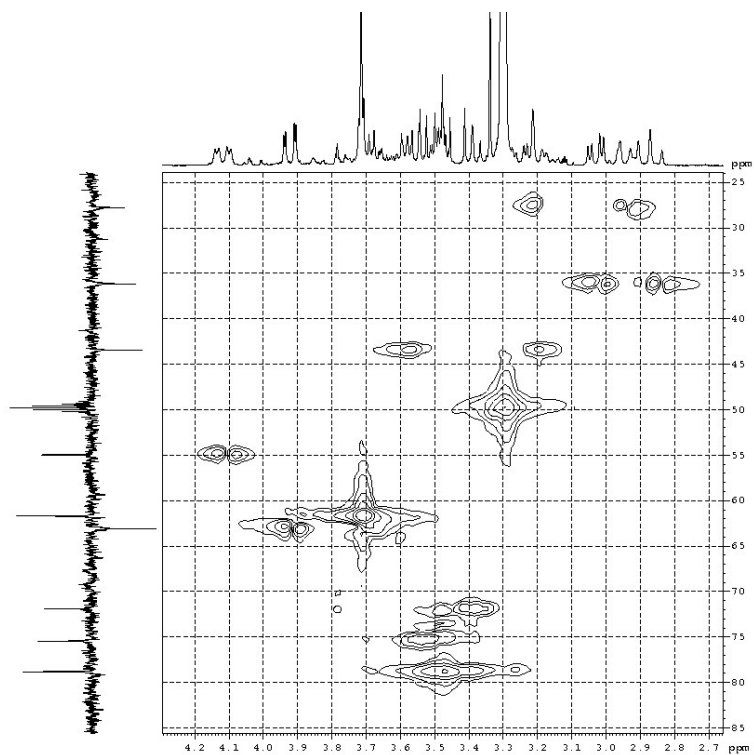

Figure S108. Expansion of HMQC spectrum of stephapierrine F (6) in CD<sub>3</sub>OD (1)

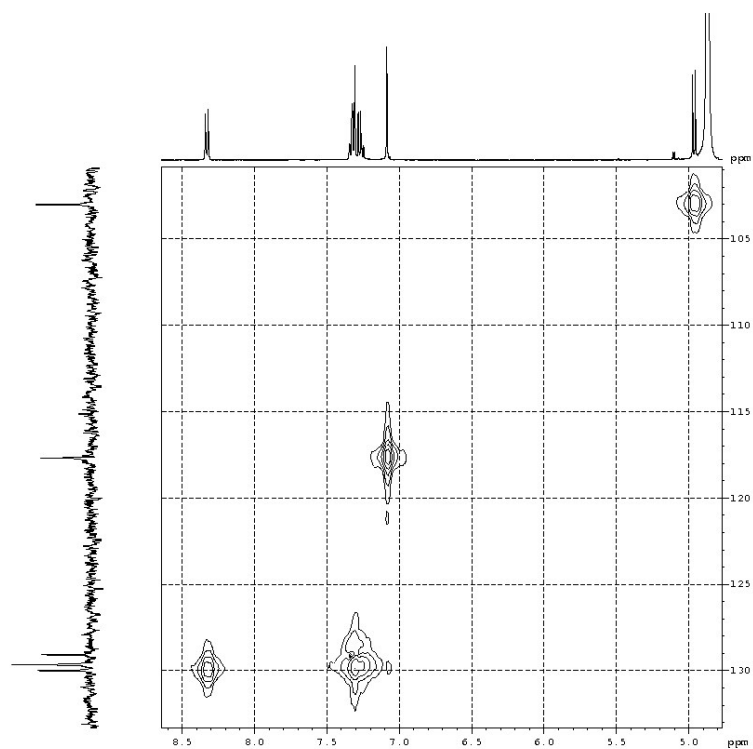

**Figure S109.** Expansion of HMQC spectrum of stephapierrine F (**6**) in CD<sub>3</sub>OD (2)

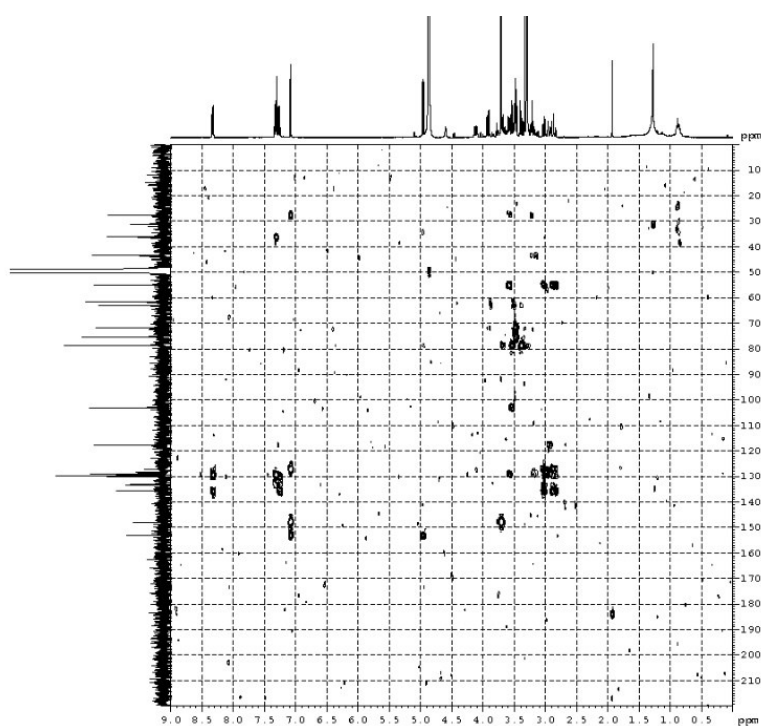

**Figure S110.** HMBC spectrum of stephapierrine F (**6**) in CD<sub>3</sub>OD



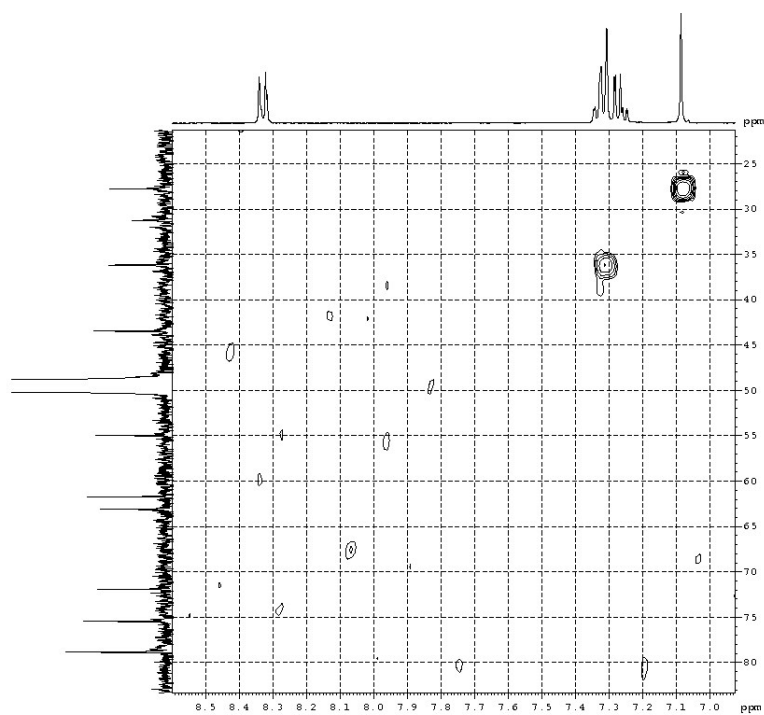

**Figure S111.** Expansion of HMBC spectrum of stephapierrine F (**6**) in CD<sub>3</sub>OD (1)

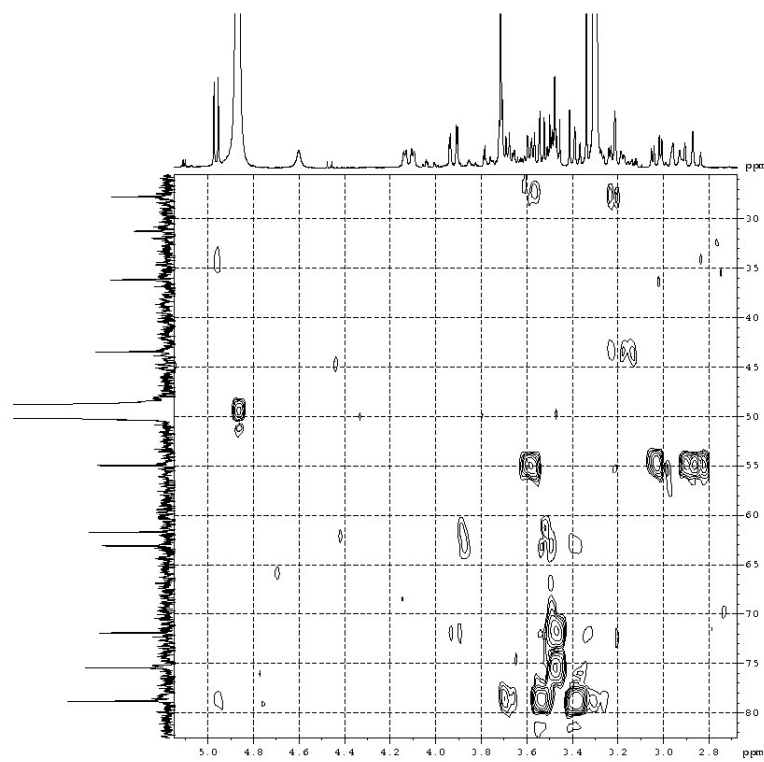

**Figure S112.** Expansion of HMBC spectrum of stephapierrine F (**6**) in CD<sub>3</sub>OD (2)

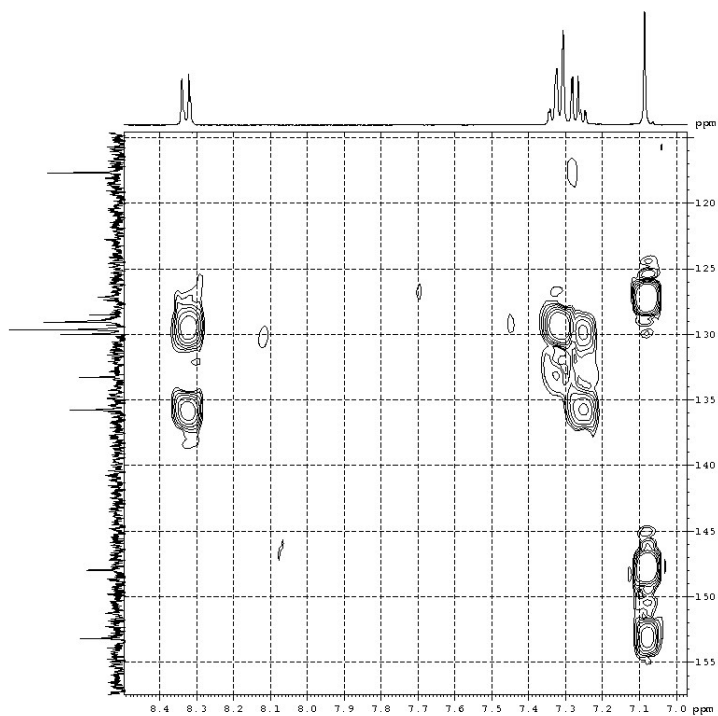

Figure S113. Expansion of HMBC spectrum of stephapierrine F (6) in CD<sub>3</sub>OD (3)

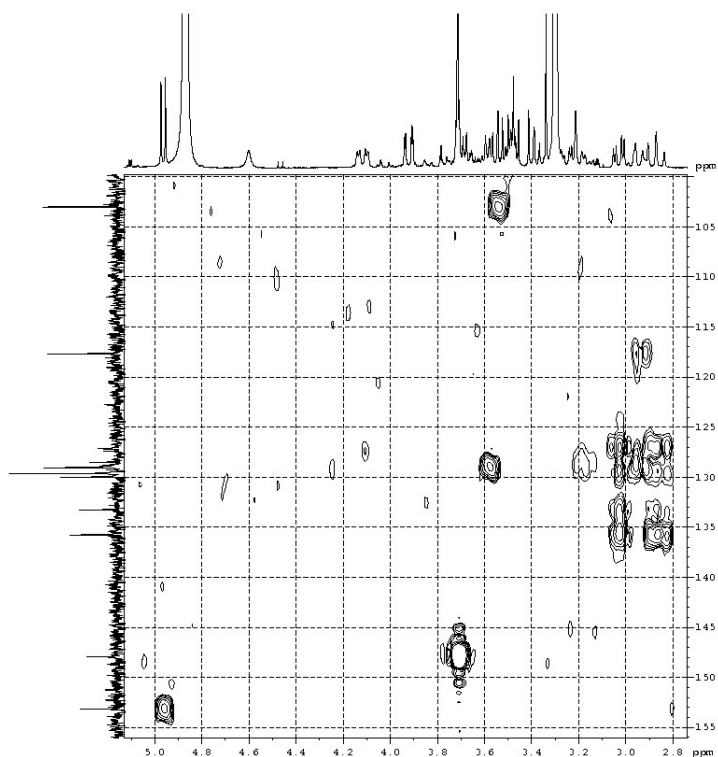

Figure S114. Expansion of HMBC spectrum of stephapierrine F (6) in CD<sub>3</sub>OD (4)

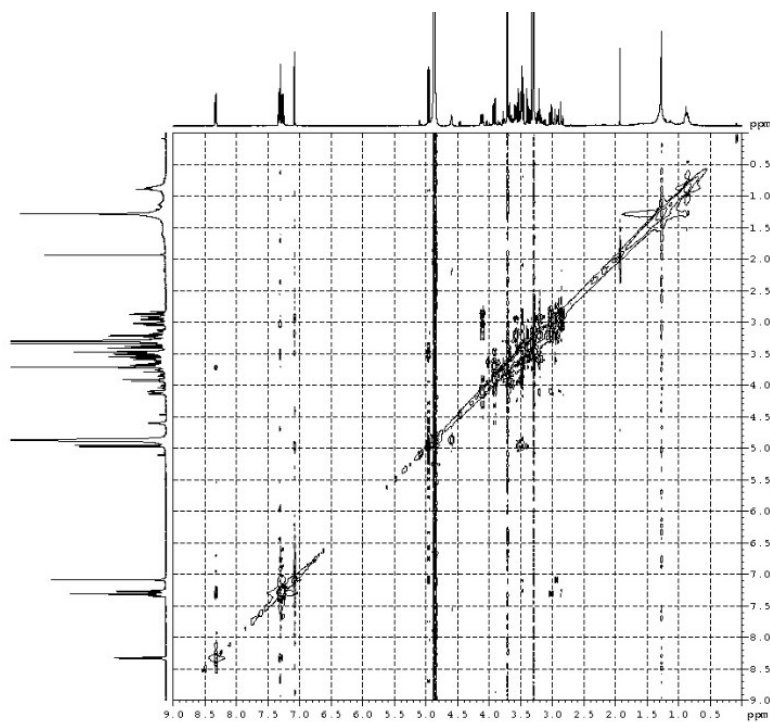

**Figure S115.** NOESY spectrum of stephapierrine F (6) in CD<sub>3</sub>OD

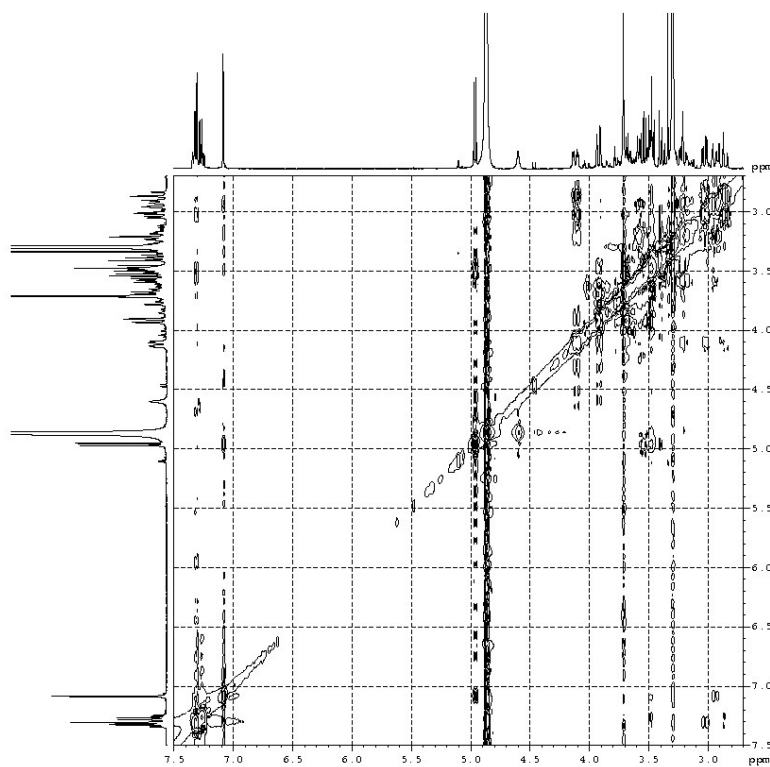

**Figure S116.** Expansion of NOESY spectrum of stephapierrine F (6) in CD<sub>3</sub>OD (1)

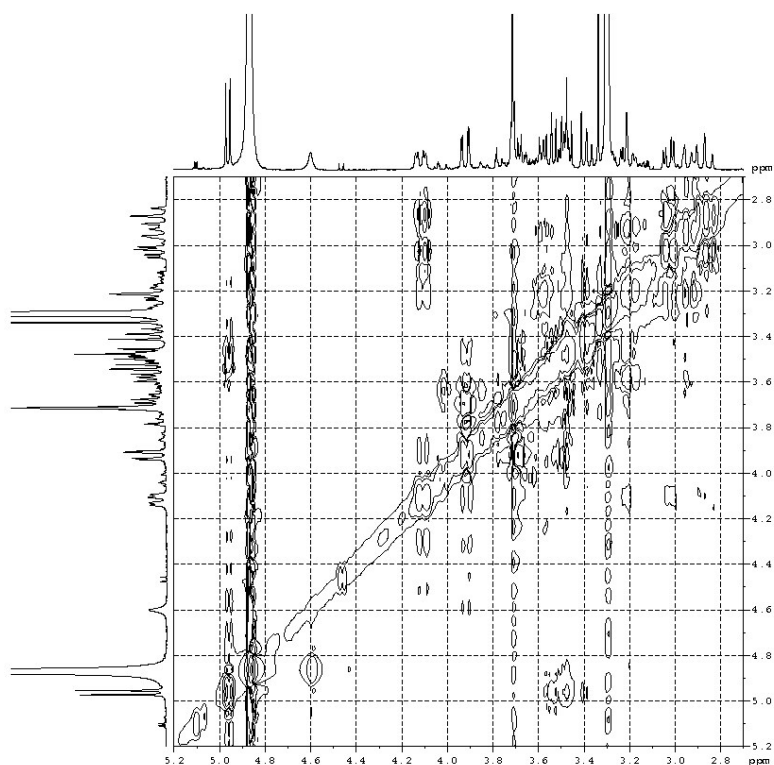

Figure S117. Expansion of NOESY spectrum of stephapierrine F (6) in CD<sub>3</sub>OD (2)

### Mass Spectrum SmartFormula Report

| Analysis Info         |                                           |                      |          | Acquisition Date      |                        |
|-----------------------|-------------------------------------------|----------------------|----------|-----------------------|------------------------|
| Analysis Name         | D:\Data\Apichart\ESINAS-HRMS 1401 (pos).d |                      |          | 2/16/2021 11:46:14 AM |                        |
| Method                | tune_wide 7-8-63(pos).m                   |                      |          | Operator              | RU                     |
| Sample Name           | AS-RU-19602                               |                      |          | Instrument            | micrOTOF 8213750.10411 |
| Comment               |                                           |                      |          |                       |                        |
| Acquisition Parameter |                                           |                      |          |                       |                        |
| Source Type           | ESI                                       | Ion Polarity         | Positive | Set Nebulizer         | 0.3 Bar                |
| Focus                 | Not active                                |                      |          | Set Dry Heater        | 180 °C                 |
| Scan Begin            | 50 m/z                                    | Set Capillary        | 4500 V   | Set Dry Gas           | 4.0 l/min              |
| Scan End              | 4000 m/z                                  | Set End Plate Offset | -500 V   | Set Divert Valve      | Waste                  |

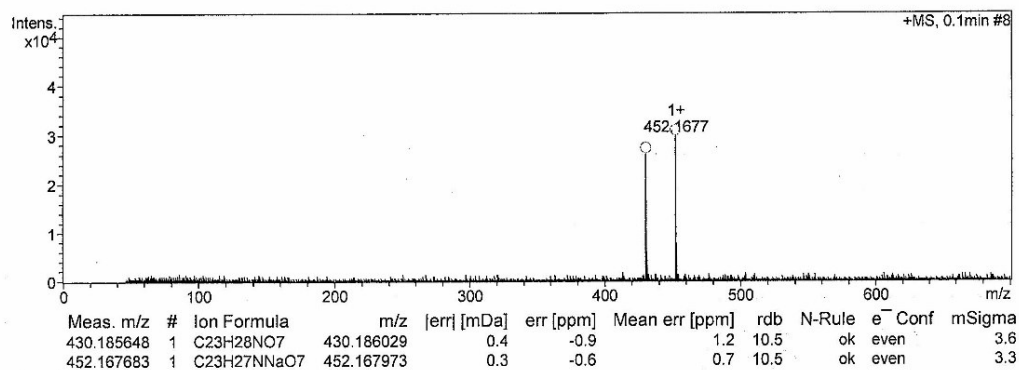

Figure S118. ESI-TOF-MS of stephapierrine F (6)

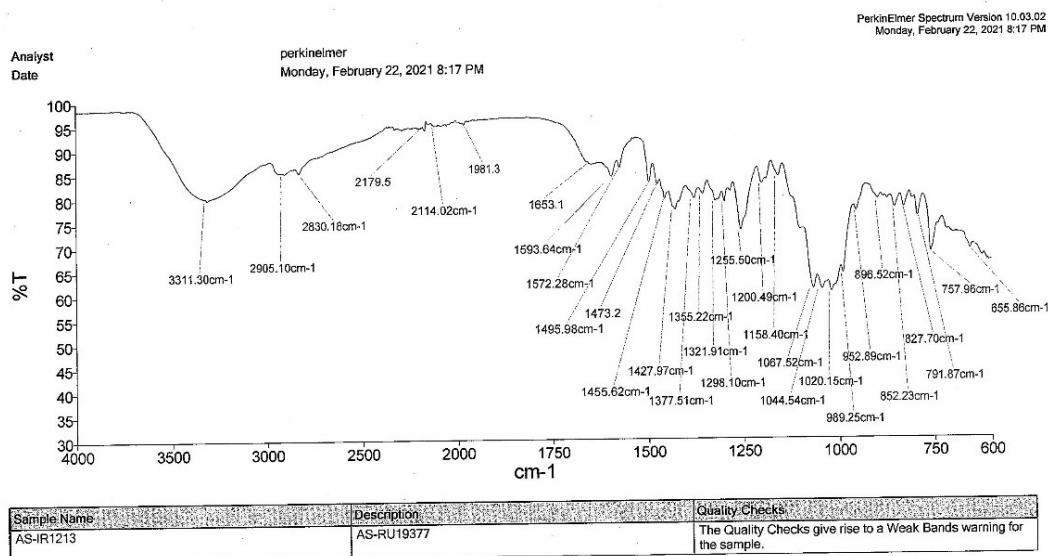

Figure S119. IR spectrum of stephapierrine F (6)

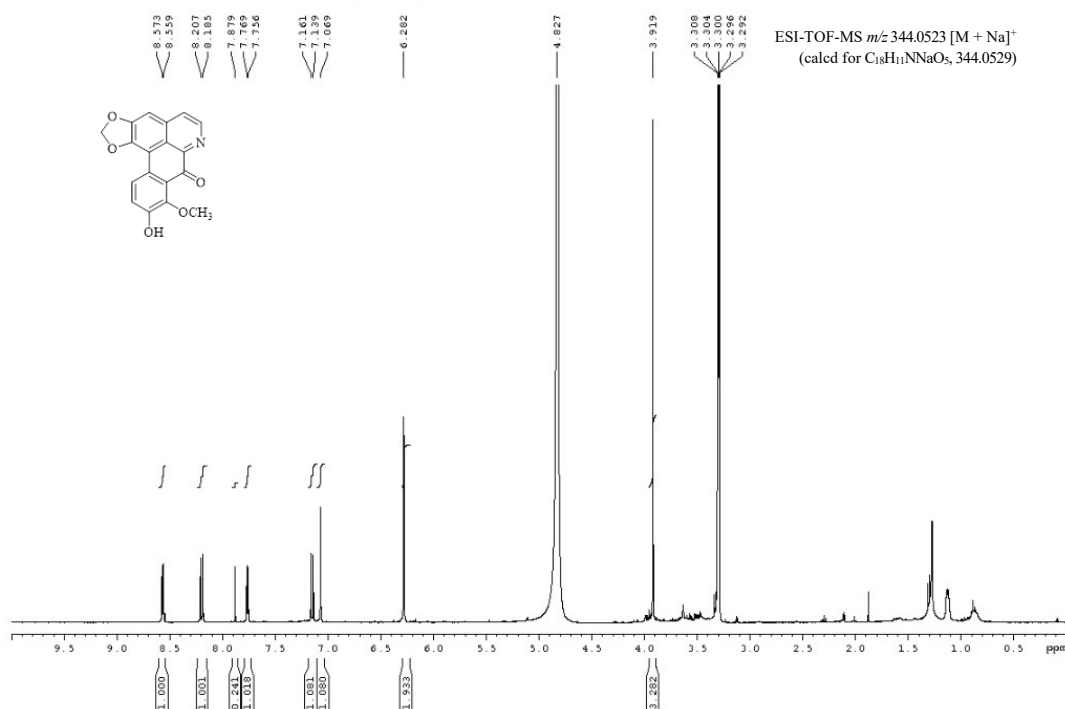

Figure S120. <sup>1</sup>H NMR spectrum (CD<sub>3</sub>OD, 400 MHz) of stephapierrine G (7)

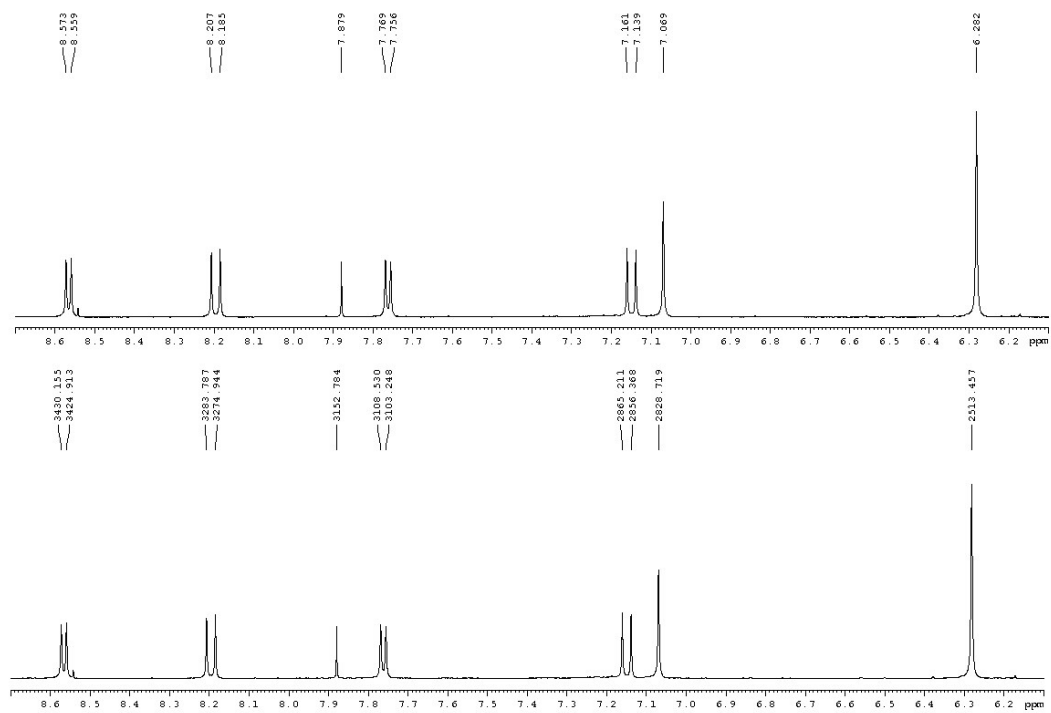

**Figure S121.** Expansion of  $^1\text{H}$  NMR spectrum ( $\text{CD}_3\text{OD}$ , 400 MHz) of stephapierrine G (7) (1)

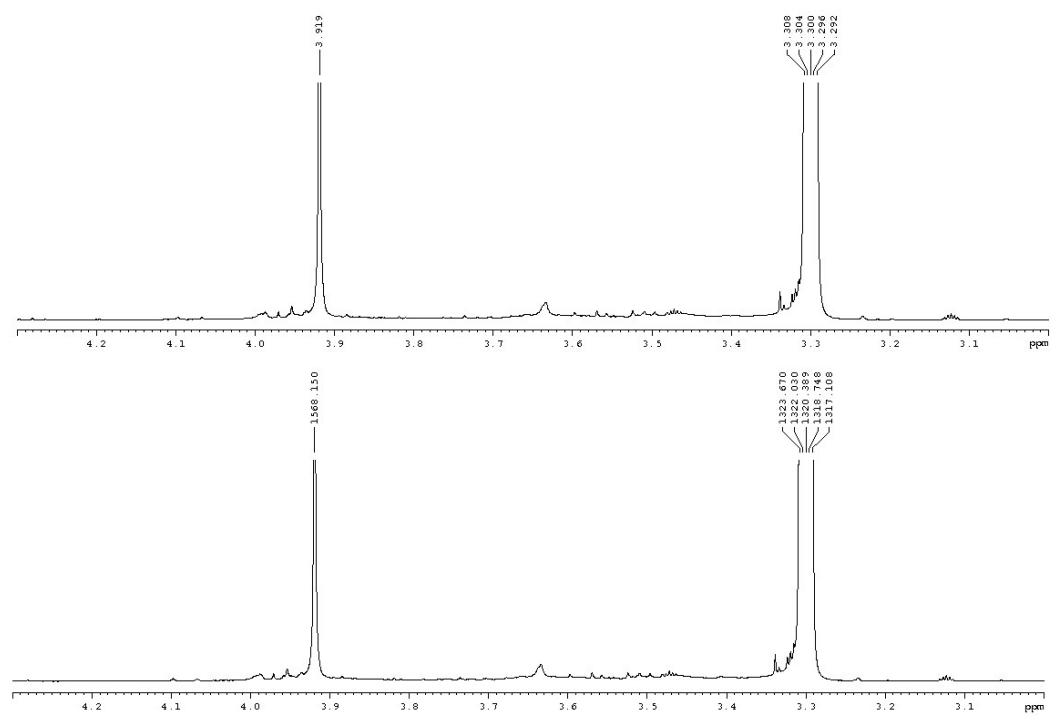

**Figure S122.** Expansion of  $^1\text{H}$  NMR spectrum ( $\text{CD}_3\text{OD}$ , 400 MHz) of stephapierrine G (7) (2)

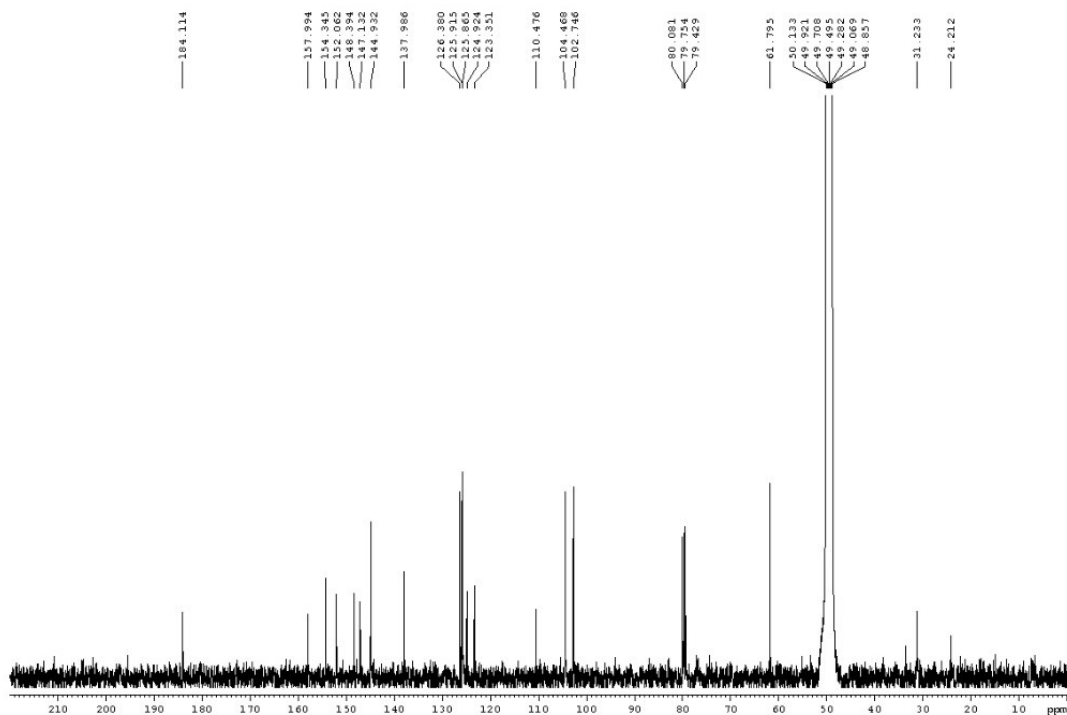

Figure S123.  $^{13}\text{C}$  NMR spectrum ( $\text{CD}_3\text{OD}$ , 100 MHz) of stephapierrine G (7)

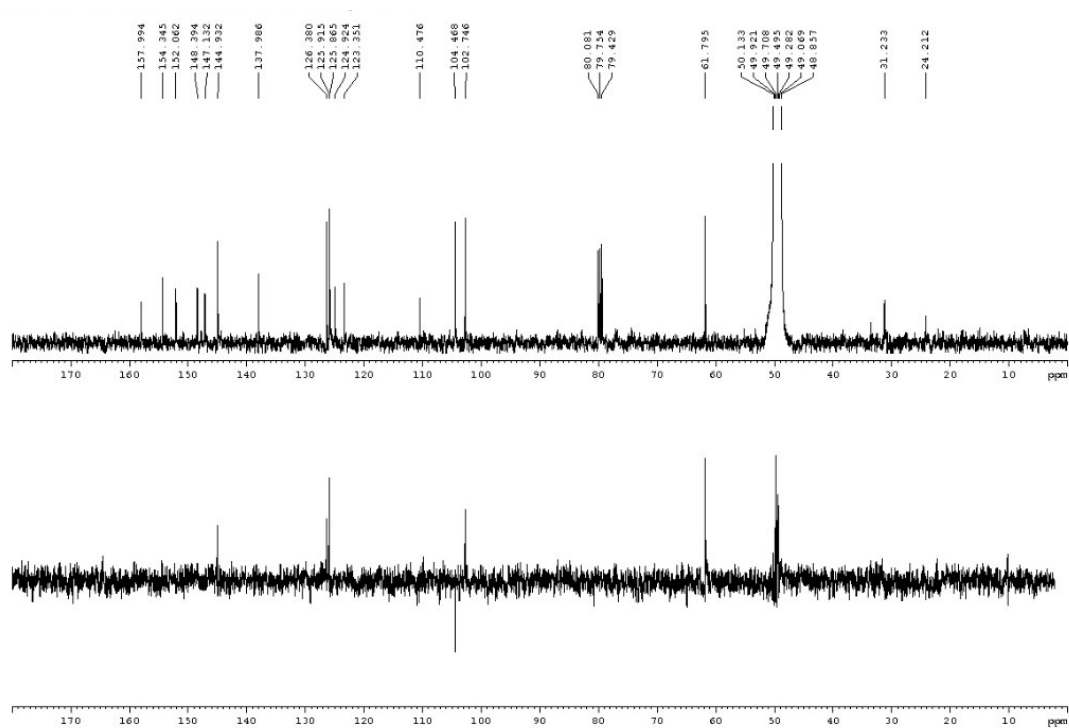

Figure S124. DEPT135 spectrum ( $\text{CD}_3\text{OD}$ , 100 MHz) of stephapierrine G (7)

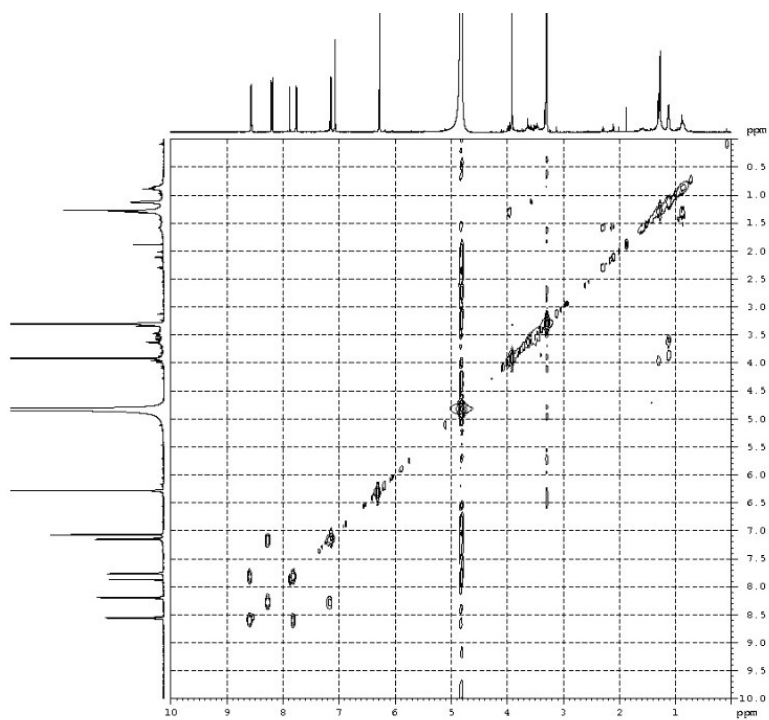

Figure S125. COSY spectrum of stephapierrine G (7) in CD<sub>3</sub>OD

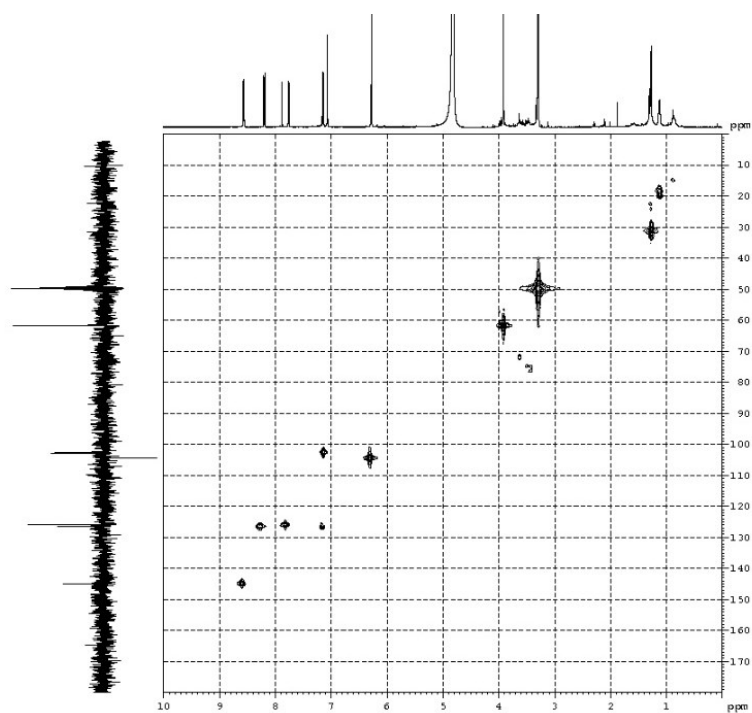

Figure S126. HMBC spectrum of stephapierrine G (7) in CD<sub>3</sub>OD



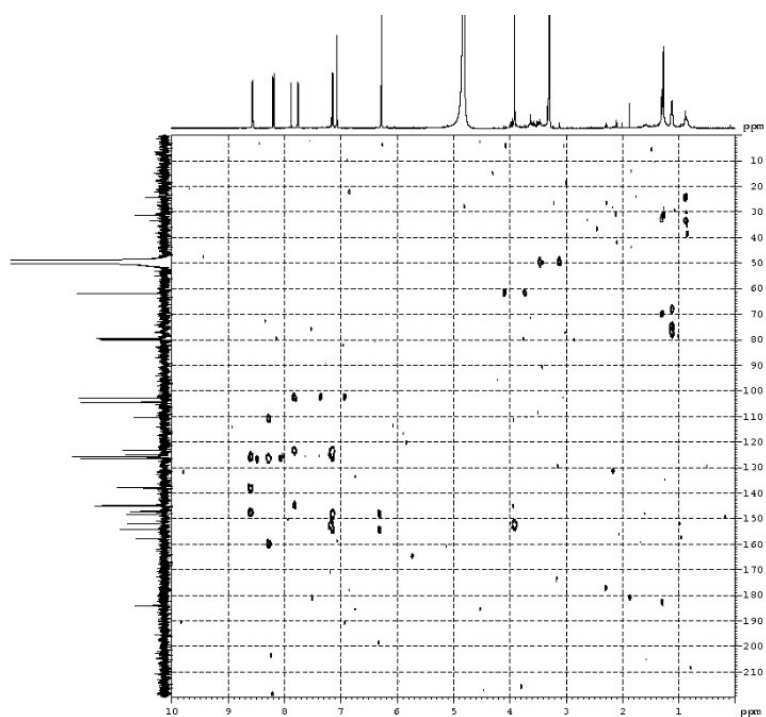

Figure S127. HMBC spectrum of stephapierrine G (7) in CD<sub>3</sub>OD

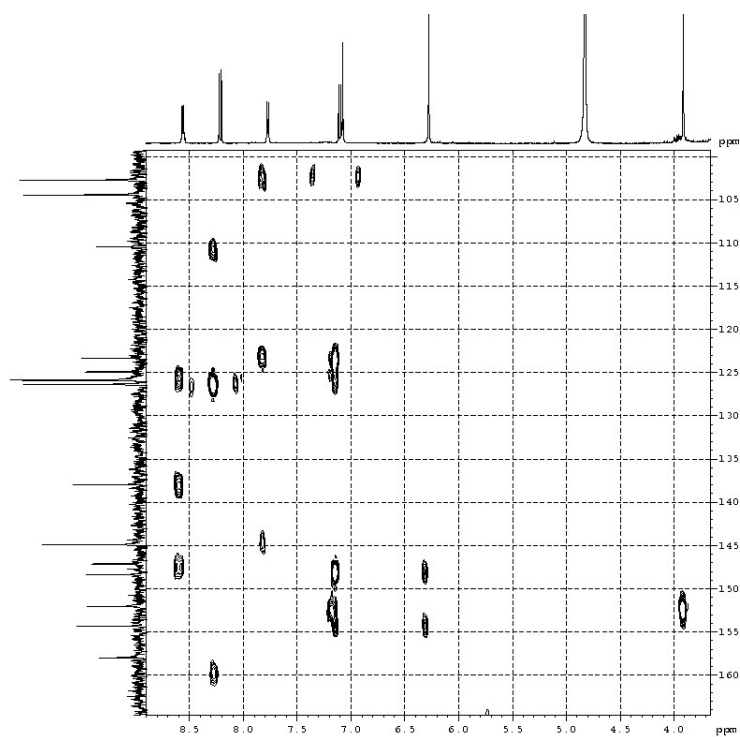

Figure S128. Expansion of HMBC spectrum of stephapierrine G (7) in CD<sub>3</sub>OD

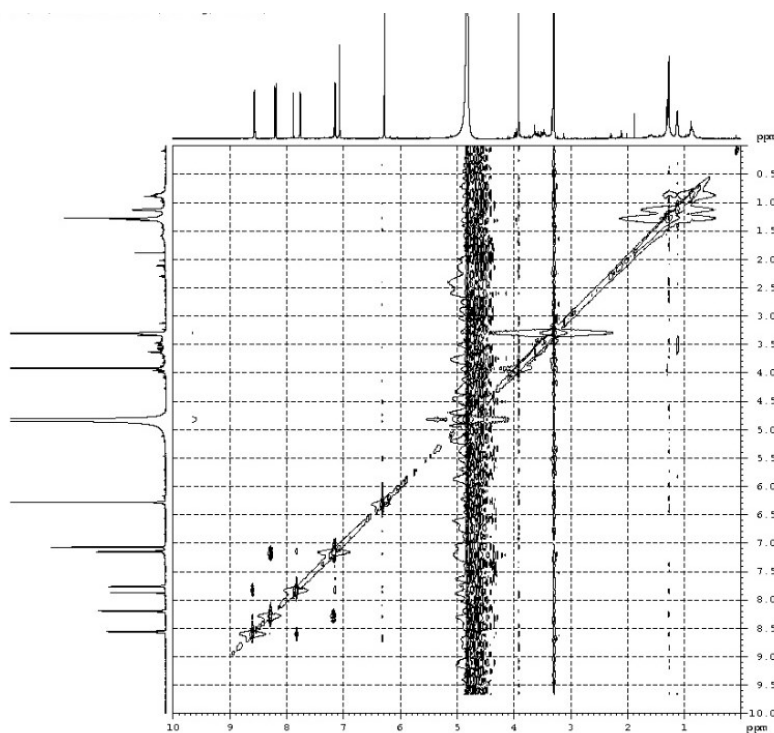

**Figure S129.** NOESY spectrum of stephapierrine G (7) in CD<sub>3</sub>OD

### Mass Spectrum SmartFormula Report

| Analysis Info |                                           | Acquisition Date |                        |
|---------------|-------------------------------------------|------------------|------------------------|
| Analysis Name | D:\Data\Apichart\ESI\AS-HRMS 1253 (pos).d | 12/7/2020        | 3:14:42 PM             |
| Method        | tune_wide-RU.m                            | Operator         | RU                     |
| Sample Name   | AS-RU 19345                               | Instrument       | micrOTOF 8213750.10411 |
| Comment       |                                           |                  |                        |

| Acquisition Parameter |            |                      |          |                  |           |
|-----------------------|------------|----------------------|----------|------------------|-----------|
| Source Type           | ESI        | Ion Polarity         | Positive | Set Nebulizer    | 0.3 Bar   |
| Focus                 | Not active |                      |          | Set Dry Heater   | 180 °C    |
| Scan Begin            | 100 m/z    | Set Capillary        | 4500 V   | Set Dry Gas      | 4.0 l/min |
| Scan End              | 4000 m/z   | Set End Plate Offset | -500 V   | Set Divert Valve | Waste     |

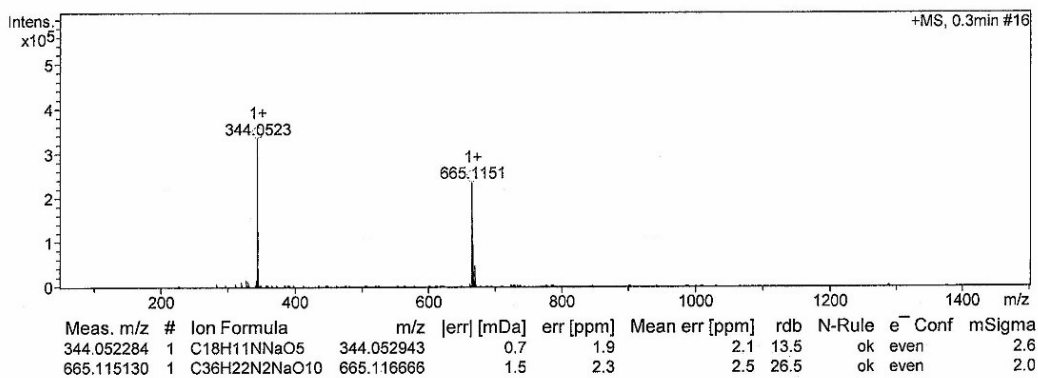

**Figure S130.** ESI-TOF-MS of stephapierrine G (7)

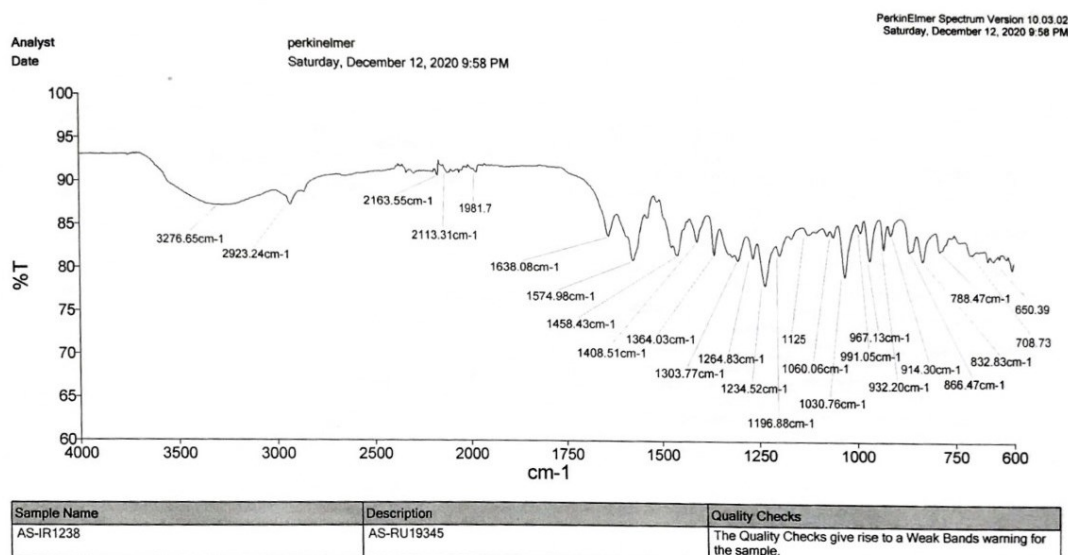

Figure S131. IR spectrum of stephapierrine G (7)

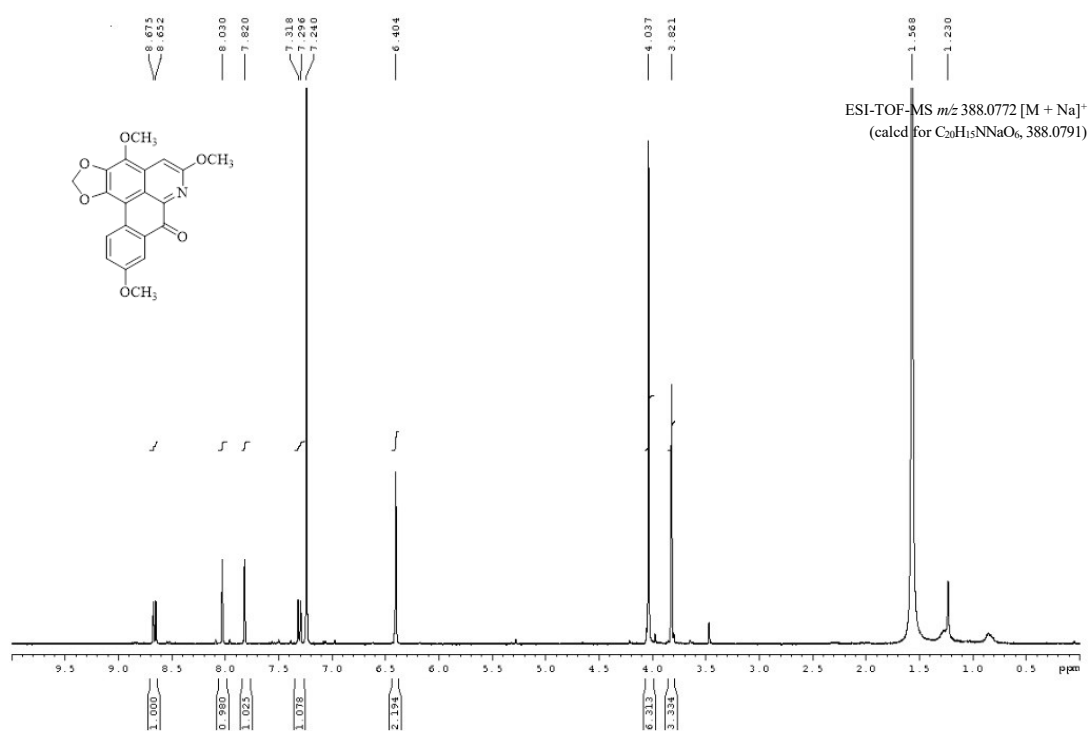

Figure S132. <sup>1</sup>H NMR spectrum (CDCl<sub>3</sub>, 400 MHz) of stephapierrine H (8)

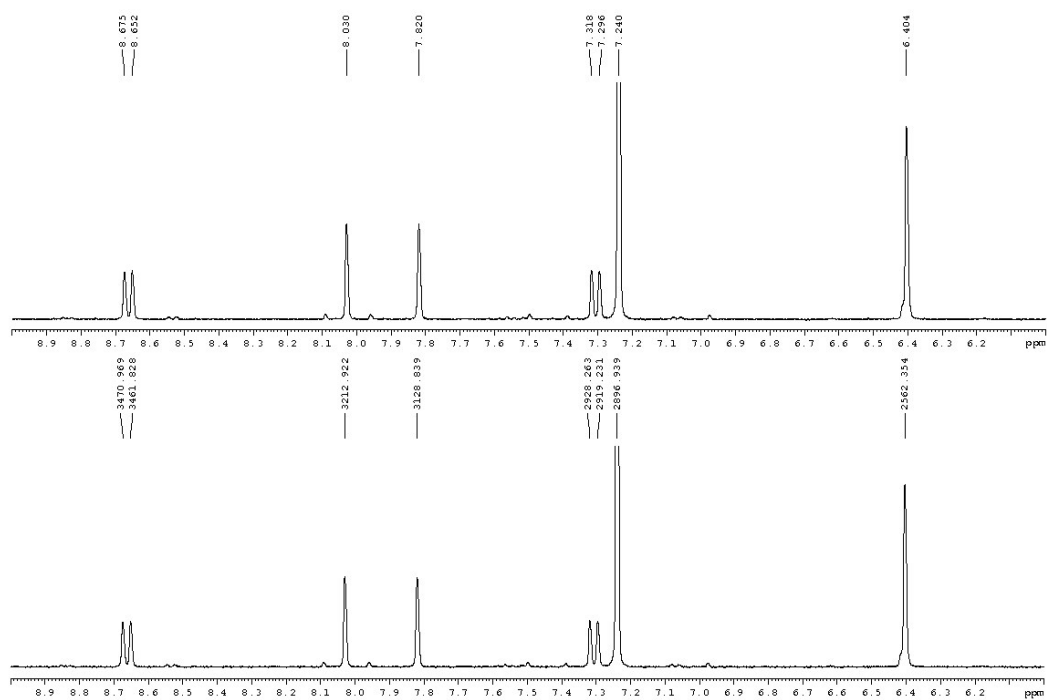

Figure S133. Expansion of <sup>1</sup>H NMR spectrum (CDCl<sub>3</sub>, 400 MHz) of stephapierrine H (8) (1)

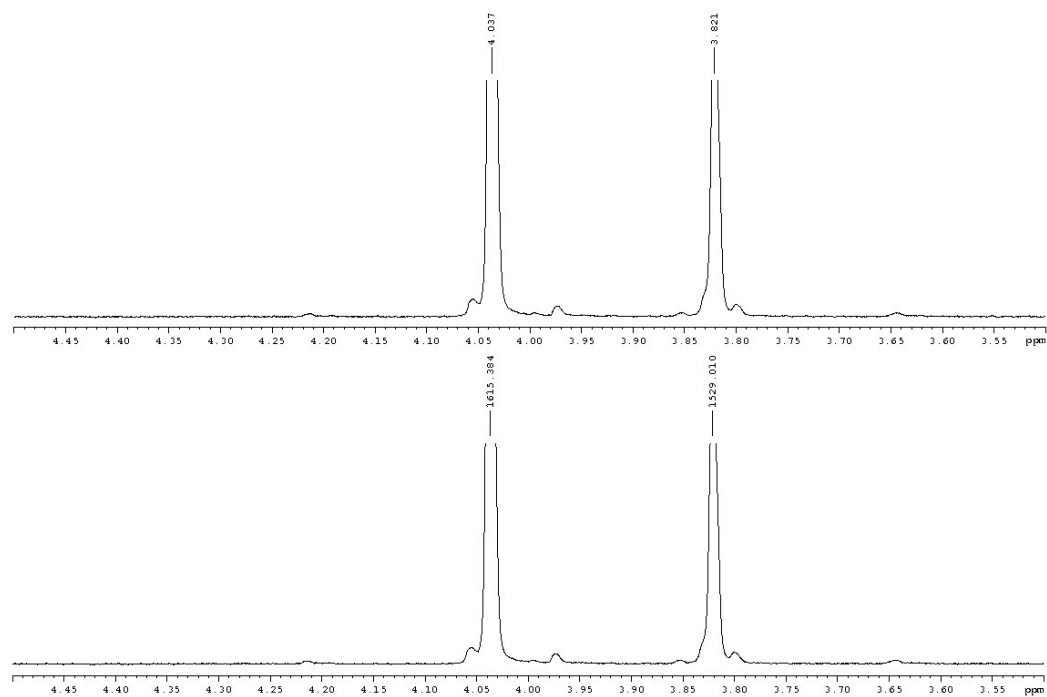

Figure S134. Expansion of <sup>1</sup>H NMR spectrum (CDCl<sub>3</sub>, 400 MHz) of stephapierrine H (8) (2)

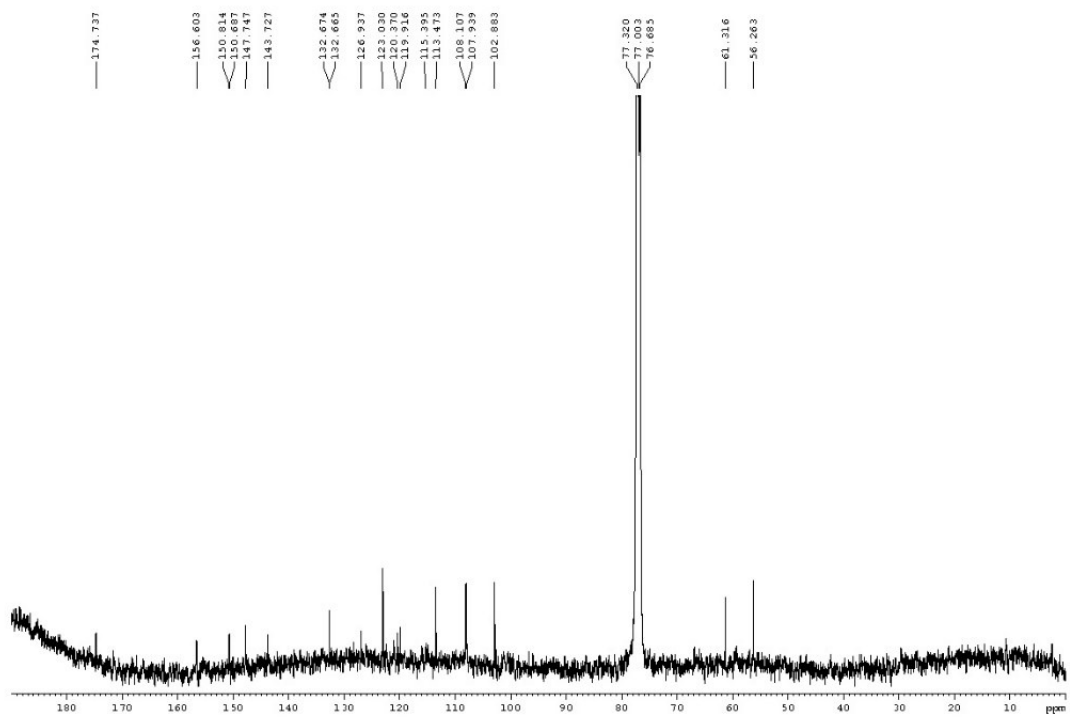

Figure S135. <sup>13</sup>C NMR spectrum (CDCl<sub>3</sub>, 100 MHz) of stephapierrine H (8)

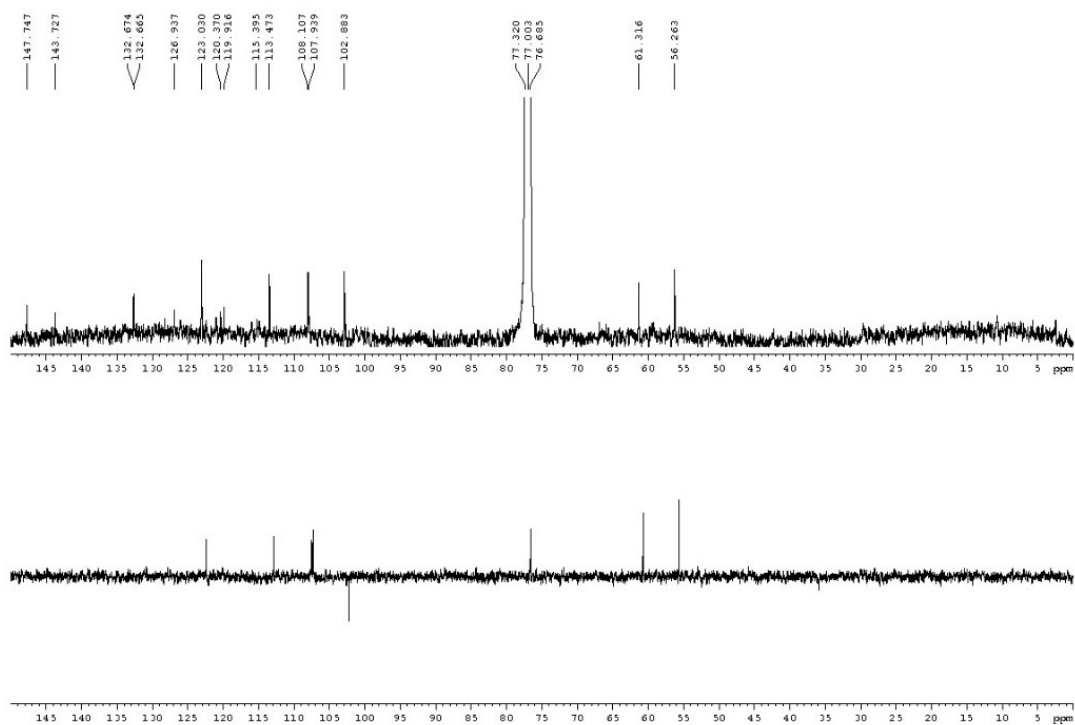

Figure S136. DEPT135 spectrum (CDCl<sub>3</sub>, 100 MHz) of stephapierrine H (8)

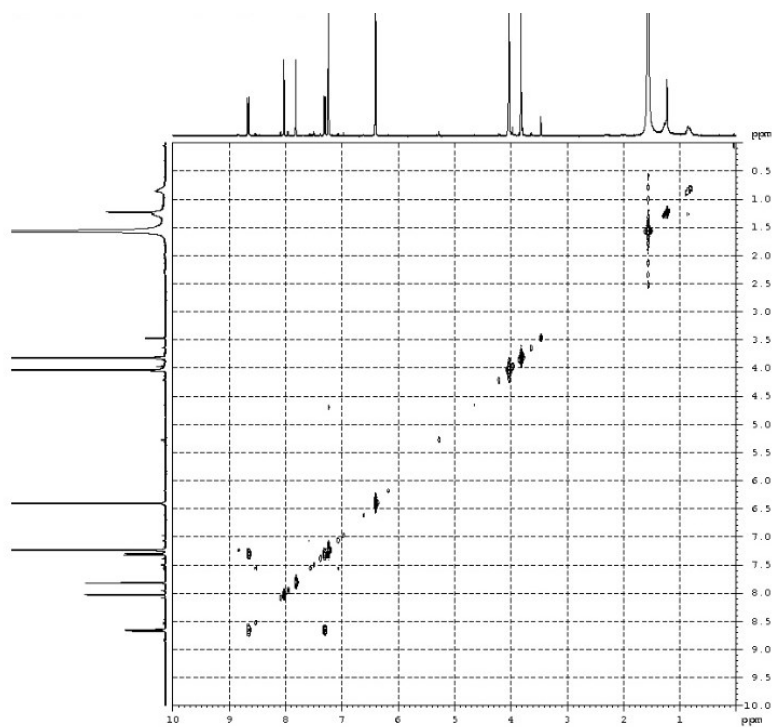

Figure S137. COSY spectrum of stephapierrine H (**8**) in  $\text{CDCl}_3$

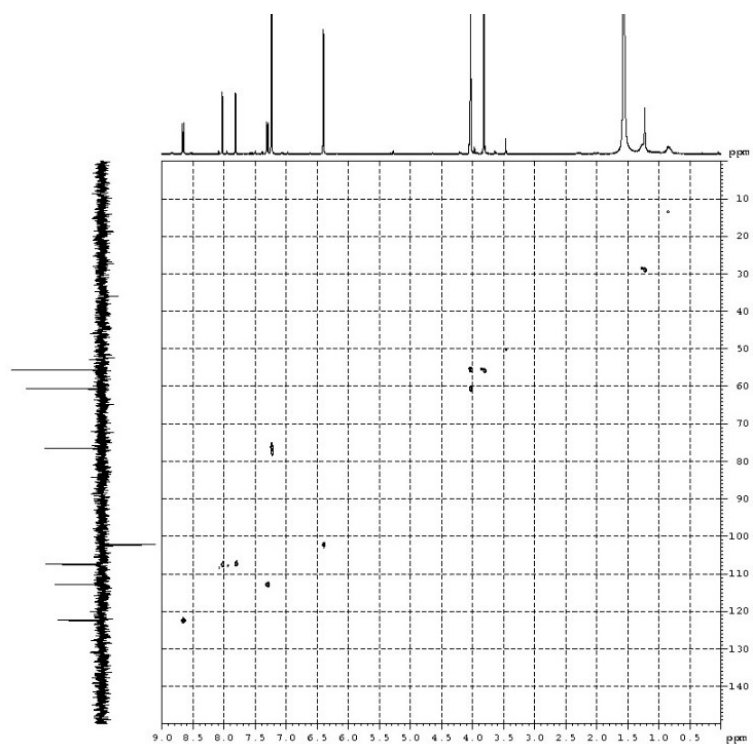

Figure S138. HMQC spectrum of stephapierrine H (**8**) in  $\text{CDCl}_3$

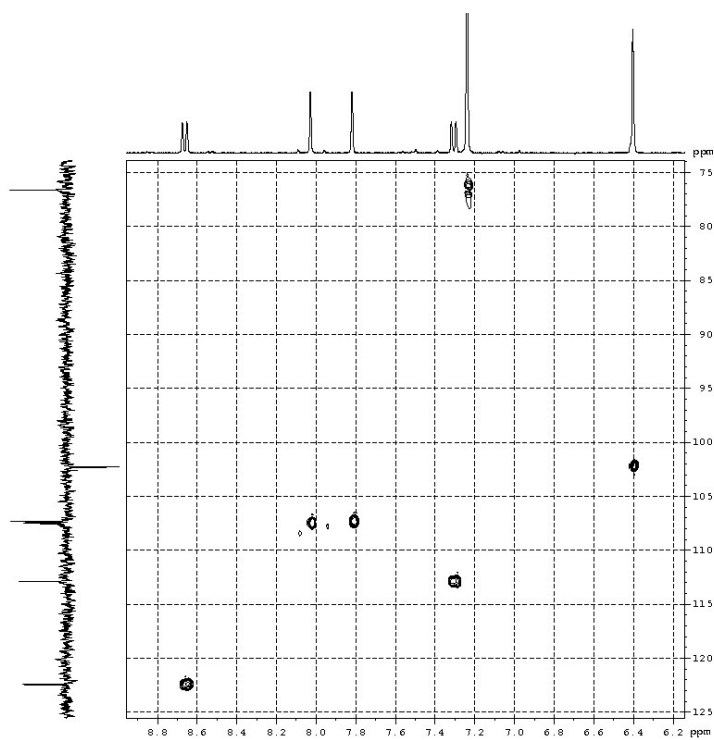

Figure S139. Expansion of HMQC spectrum of stephapierrine H (**8**) in  $\text{CDCl}_3$

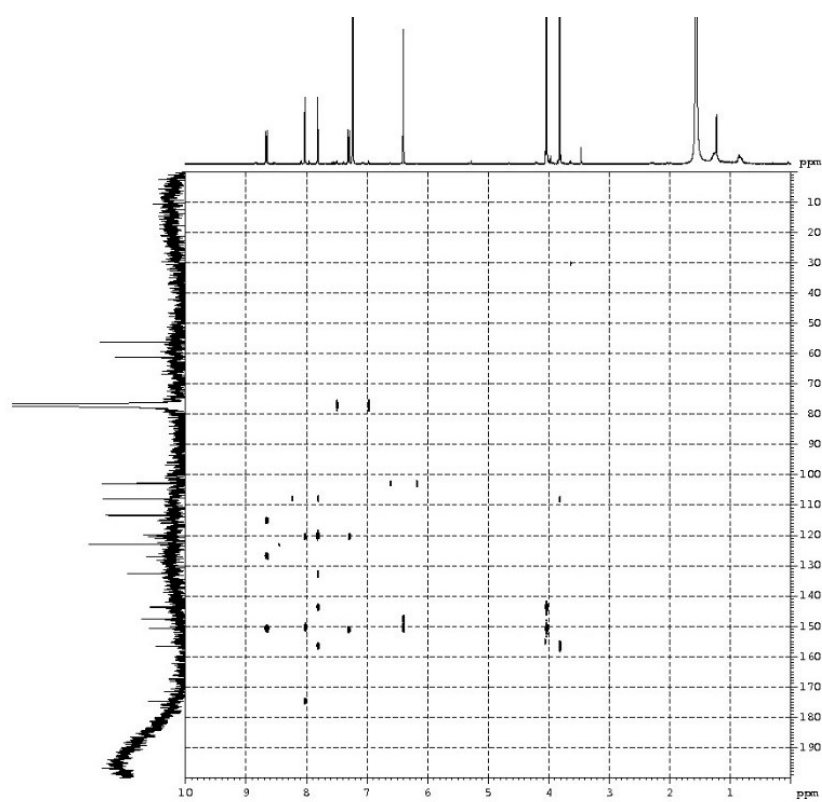

Figure S140. HMBC spectrum of stephapierrine H (**8**) in  $\text{CDCl}_3$

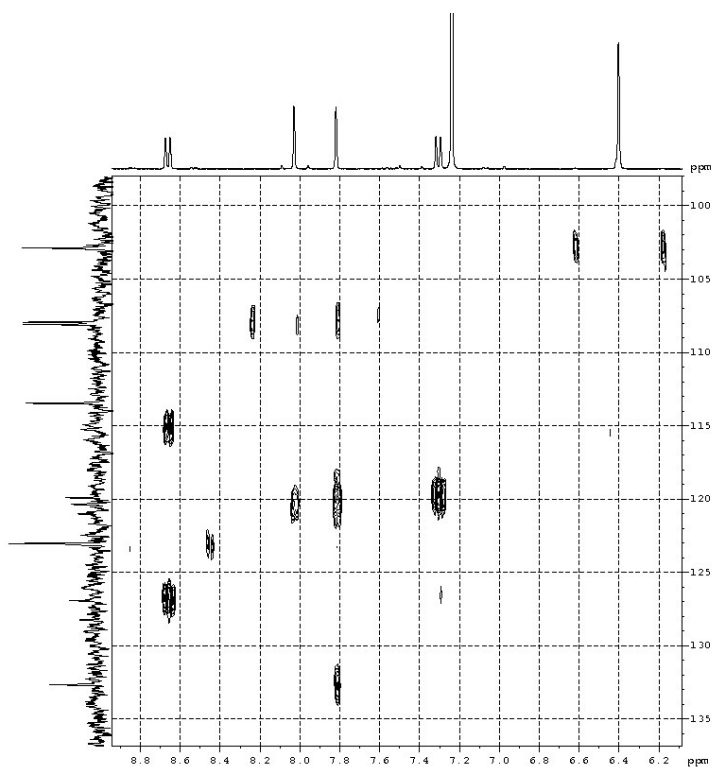

Figure S141. Expansion of HMBC spectrum of stephapierrine H (**8**) in CDCl<sub>3</sub>

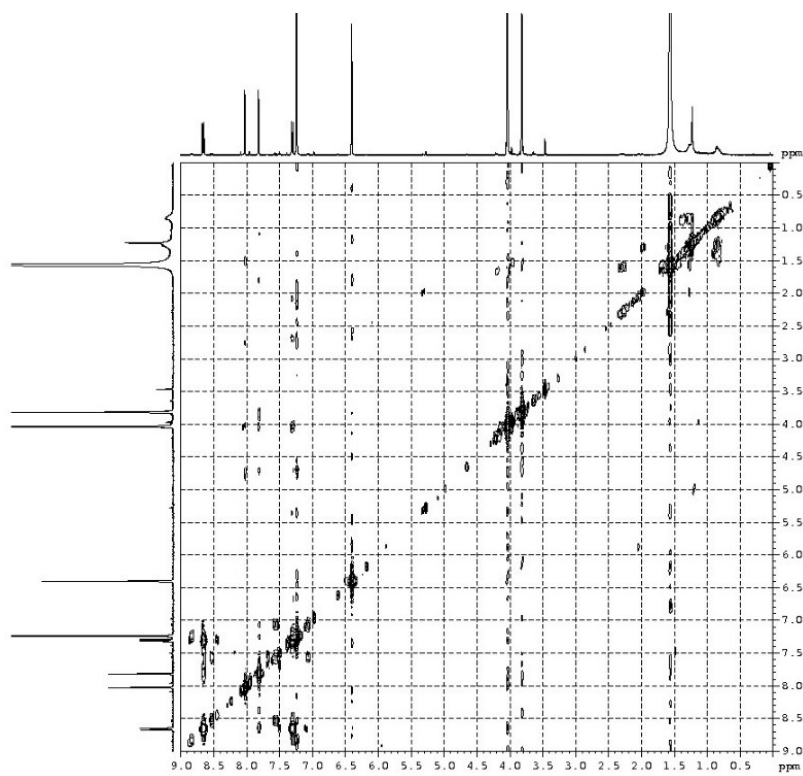

Figure S142. NOESY spectrum of stephapierrine H (**8**) in CDCl<sub>3</sub>



## Mass Spectrum SmartFormula Report

|                      |                                           |                  |                      |               |
|----------------------|-------------------------------------------|------------------|----------------------|---------------|
| <b>Analysis Info</b> |                                           | Acquisition Date | 12/7/2020 3:16:40 PM |               |
| Analysis Name        | D:\Data\Apichart\ESIVAS-HRMS 1255 (pos).d | Operator         | RU                   |               |
| Method               | tune_wide-RU.m                            | Instrument       | micrOTOF             | 8213750.10411 |
| Sample Name          | AS-RU 15925                               | Comment          |                      |               |

### Acquisition Parameter

|             |            |                      |          |                  |           |
|-------------|------------|----------------------|----------|------------------|-----------|
| Source Type | ESI        | Ion Polarity         | Positive | Set Nebulizer    | 0.3 Bar   |
| Focus       | Not active | Set Capillary        | 4500 V   | Set Dry Heater   | 180 °C    |
| Scan Begin  | 100 m/z    | Set End Plate Offset | -500 V   | Set Dry Gas      | 4.0 l/min |
| Scan End    | 4000 m/z   |                      |          | Set Divert Valve | Waste     |

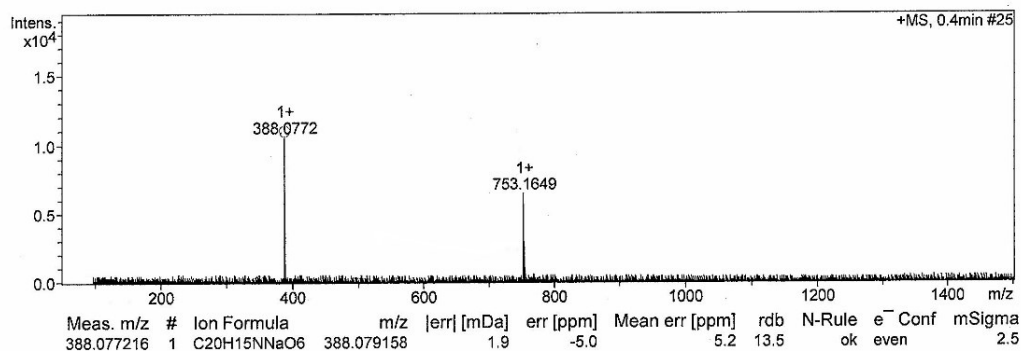

**Figure S143.** ESI-TOF-MS of stephapierrine H (8)

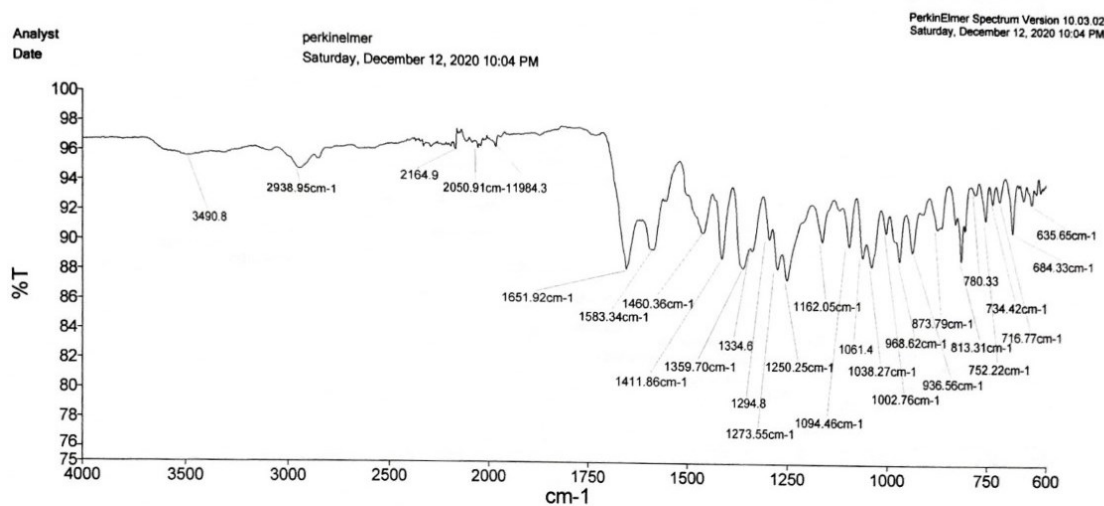

| Sample Name | Description | Quality Checks                                                       |
|-------------|-------------|----------------------------------------------------------------------|
| AS-IR1239   | AS-RU15925  | The Quality Checks give rise to a Weak Bands warning for the sample. |

**Figure S144.** IR spectrum of stephapierrine H (8)

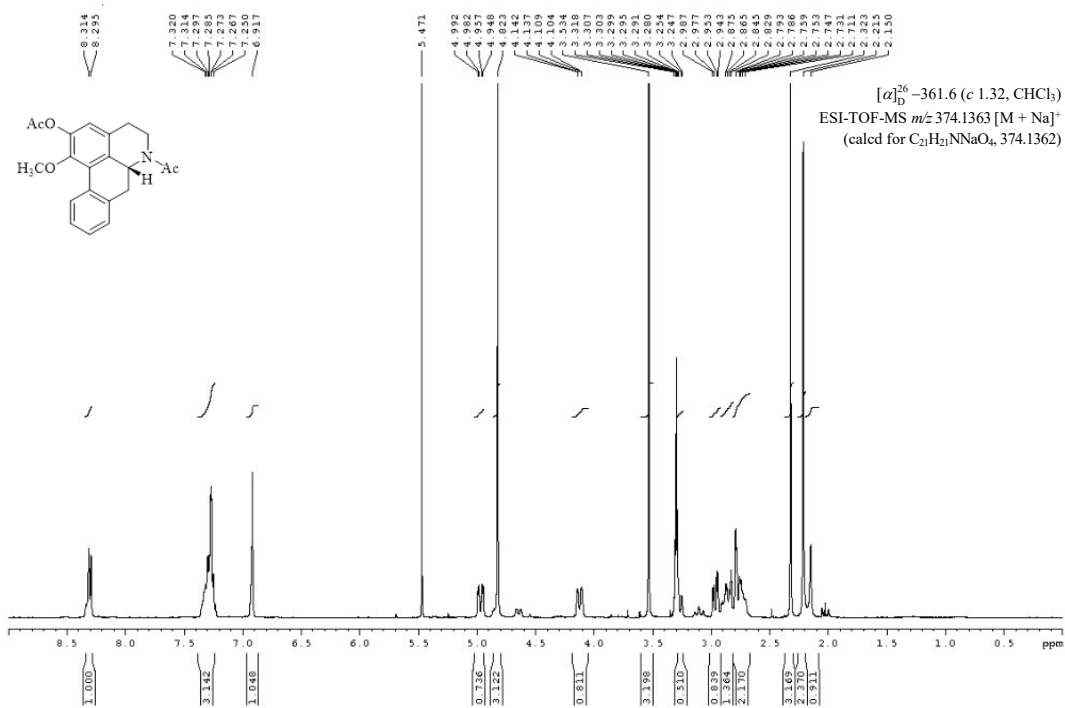

Figure S145.  $^1\text{H}$  NMR spectrum ( $\text{CD}_3\text{OD}$ , 400 MHz) of *O,N*-diacetylasimilobine (9)

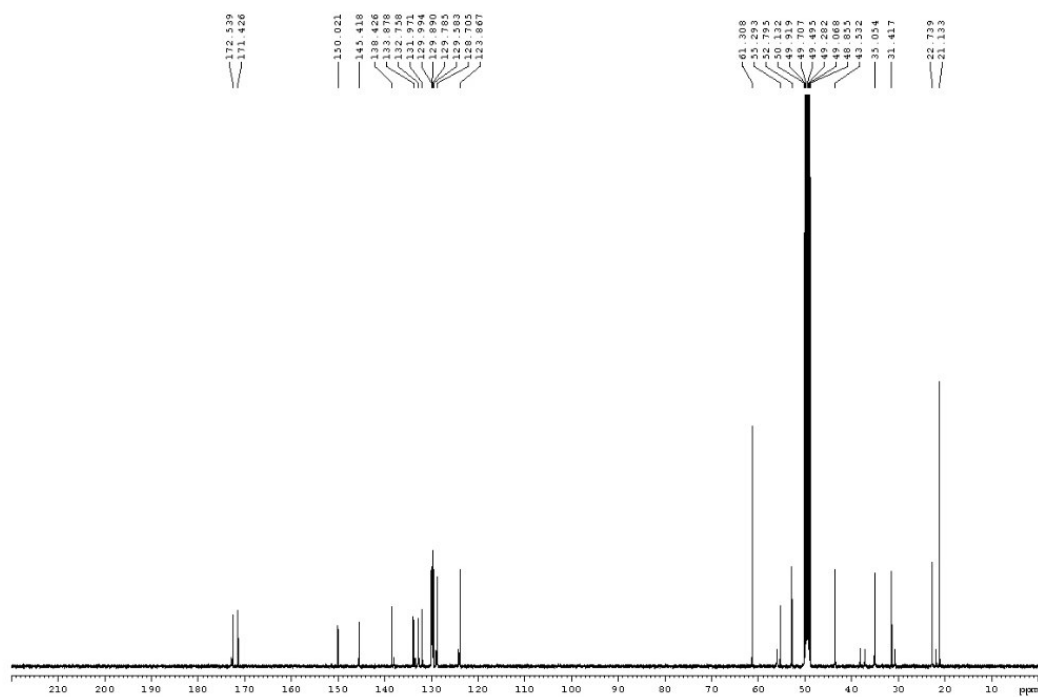

Figure S146.  $^{13}\text{C}$  NMR spectrum ( $\text{CD}_3\text{OD}$ , 100 MHz) of *O,N*-diacetylasimilobine (9)

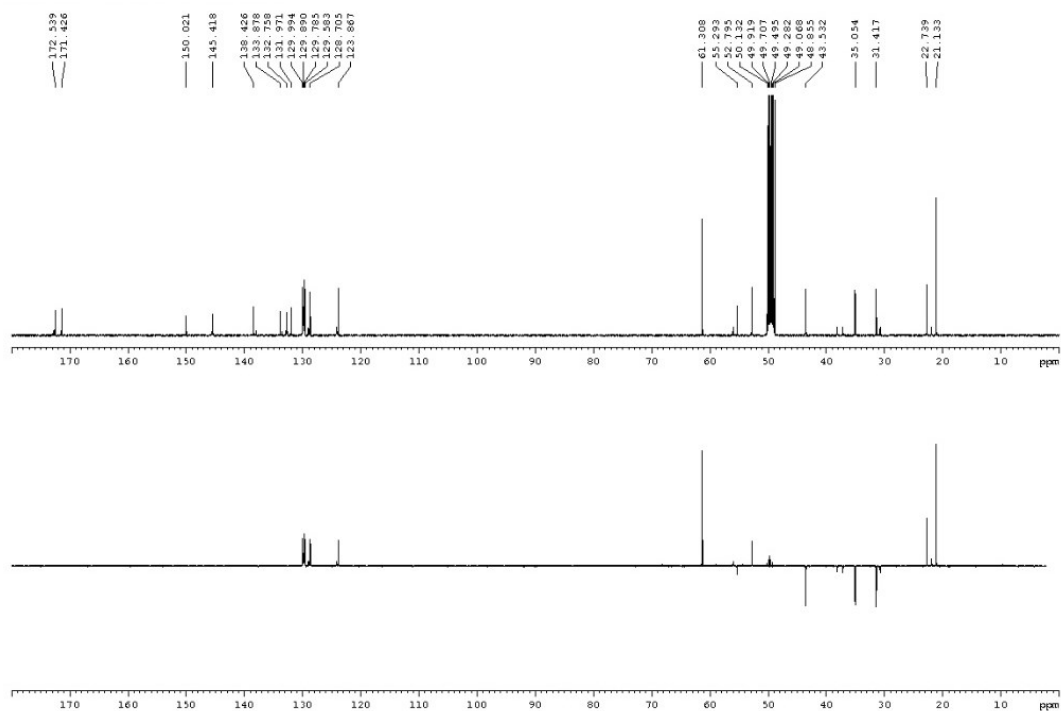

Figure S147. DEPT135 spectrum (CD<sub>3</sub>OD, 100 MHz) of *O,N*-diacetylasimilobine (**9**)

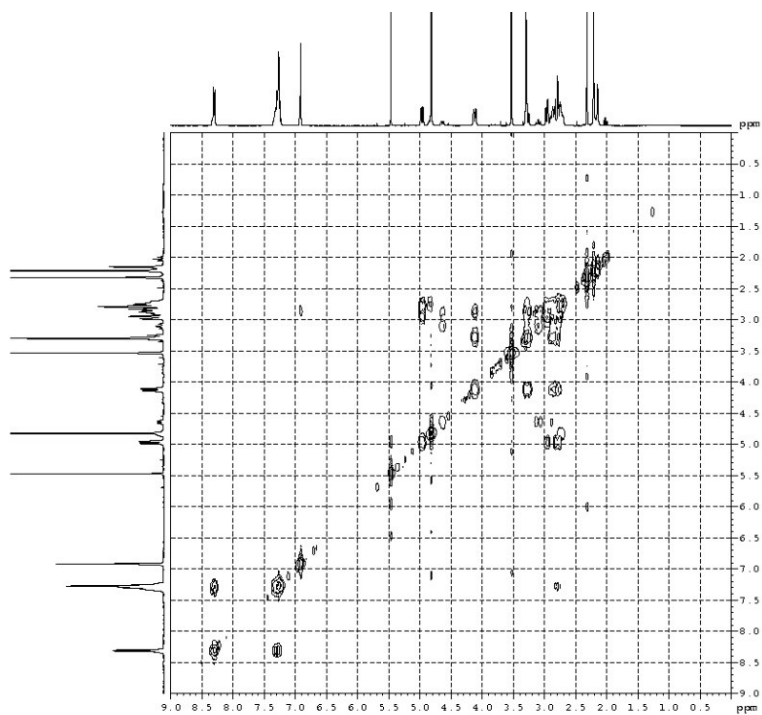

Figure S148. COSY spectrum of *O,N*-diacetylasimilobine (**9**) in CD<sub>3</sub>OD

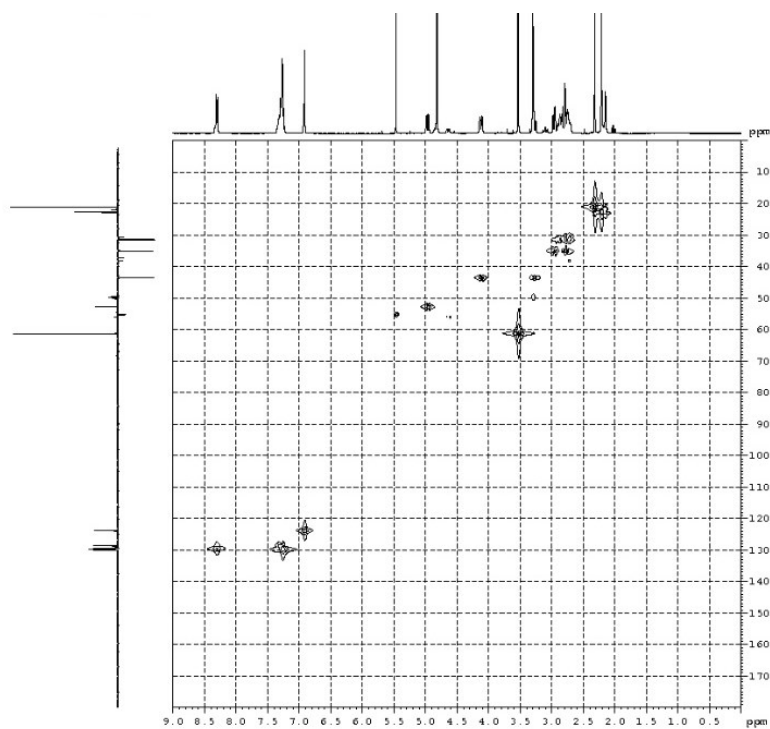

**Figure S149.** HMQC spectrum of *O,N*-diacetylasimilobine (**9**) in CD<sub>3</sub>OD

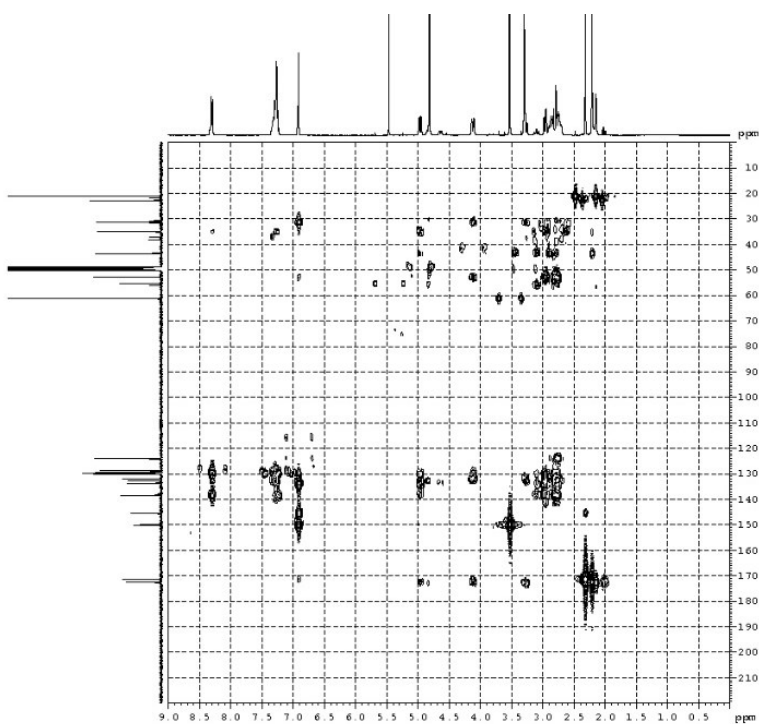

**Figure S150.** HMBC spectrum of *O,N*-diacetylasimilobine (**9**) in CD<sub>3</sub>OD

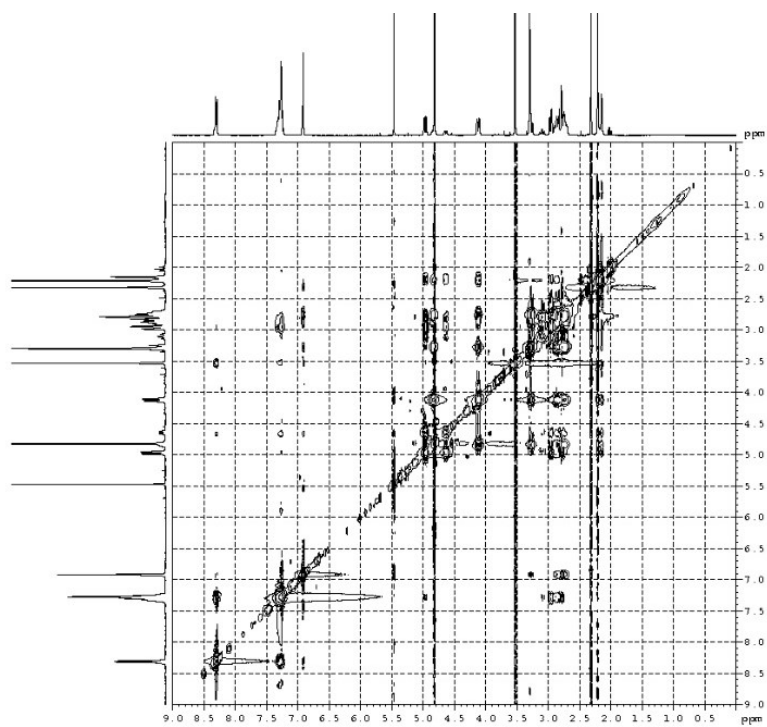

**Figure S151.** NOESY spectrum of *O,N*-diacetylasimilobine (**9**) in  $\text{CD}_3\text{OD}$

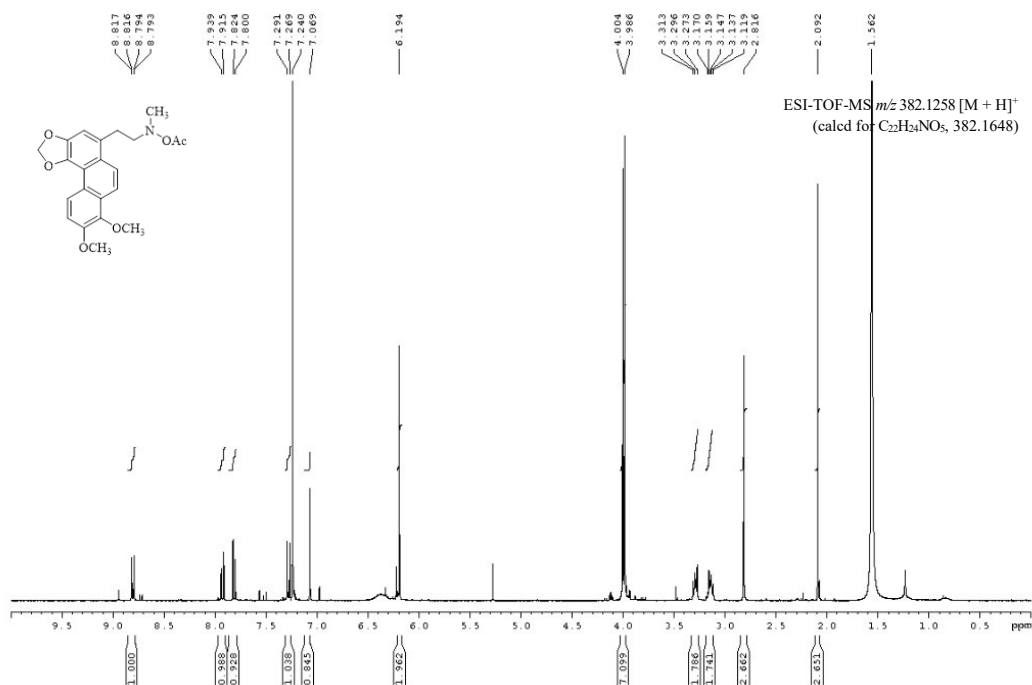

**Figure S152.**  $^1\text{H}$  NMR spectrum ( $\text{CDCl}_3$ , 400 MHz) of *N*-acetamideseocrebanine (**10**)

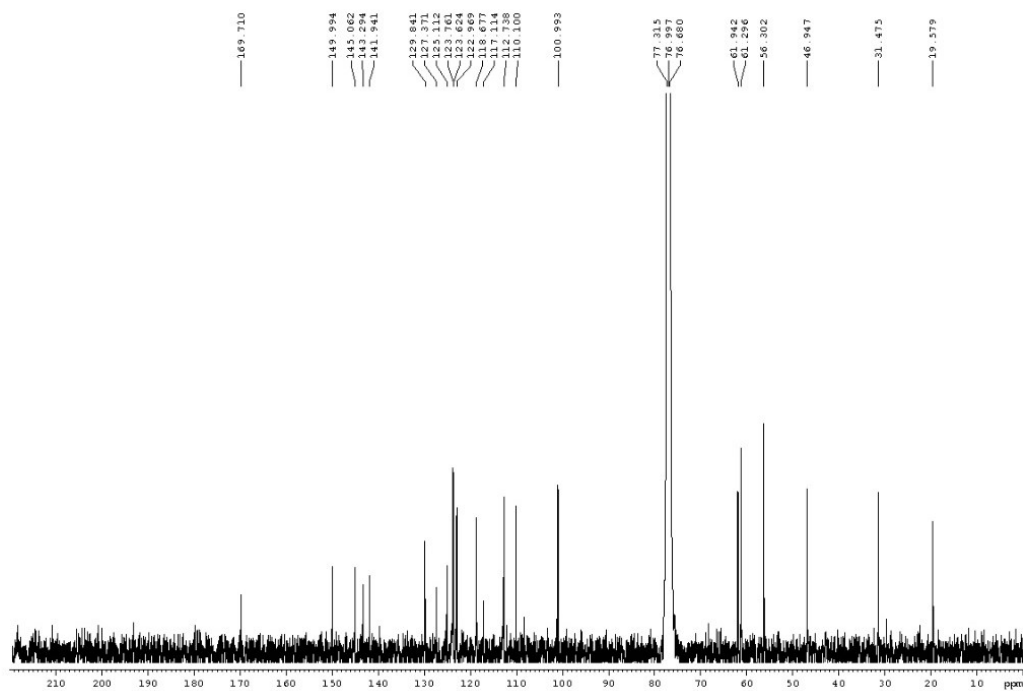

Figure S153. <sup>13</sup>C NMR spectrum (CDCl<sub>3</sub>, 100 MHz) of *N*-acetamideseccrebanine (10)

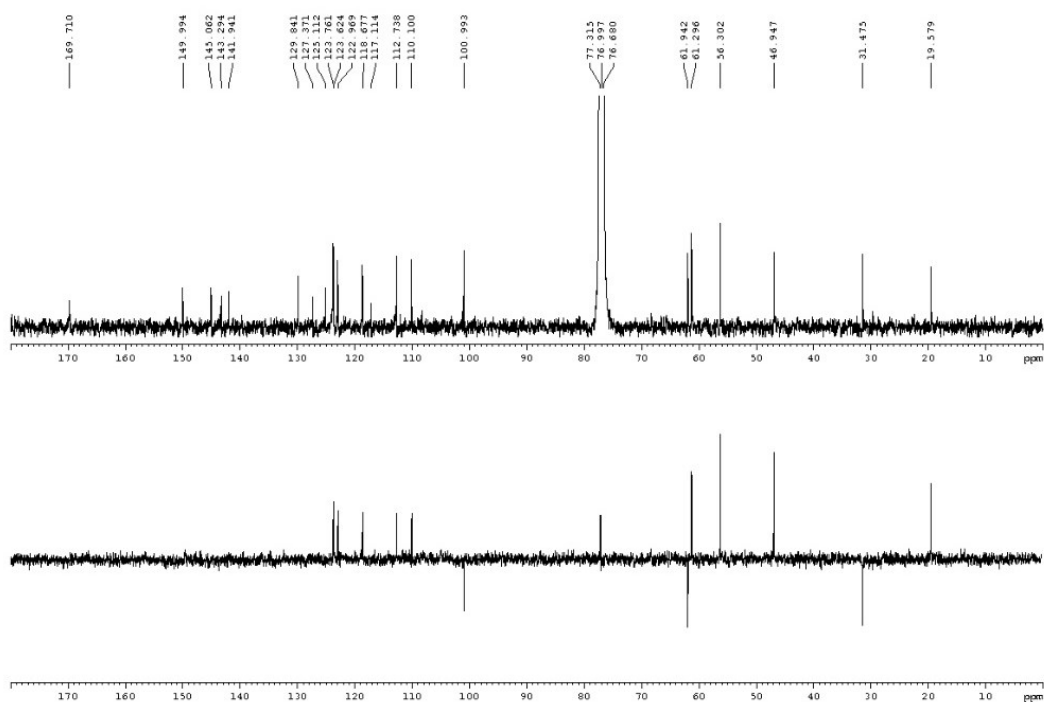

Figure S154. DEPT135 spectrum (CDCl<sub>3</sub>, 100 MHz) of *N*-acetamideseccrebanine (10)

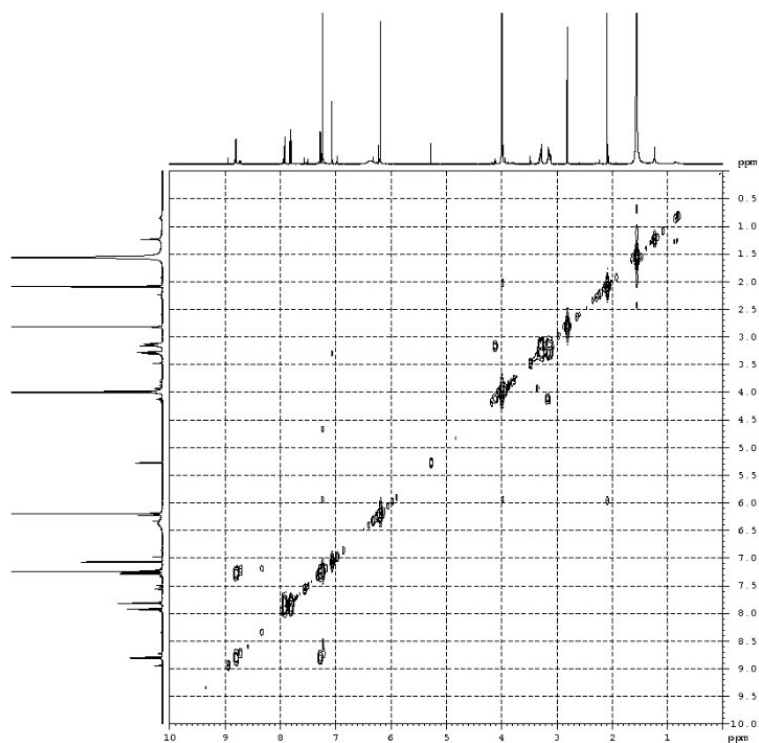

Figure S155. COSY spectrum of *N*-acetamideseccrebanine (**10**) in CDCl<sub>3</sub>

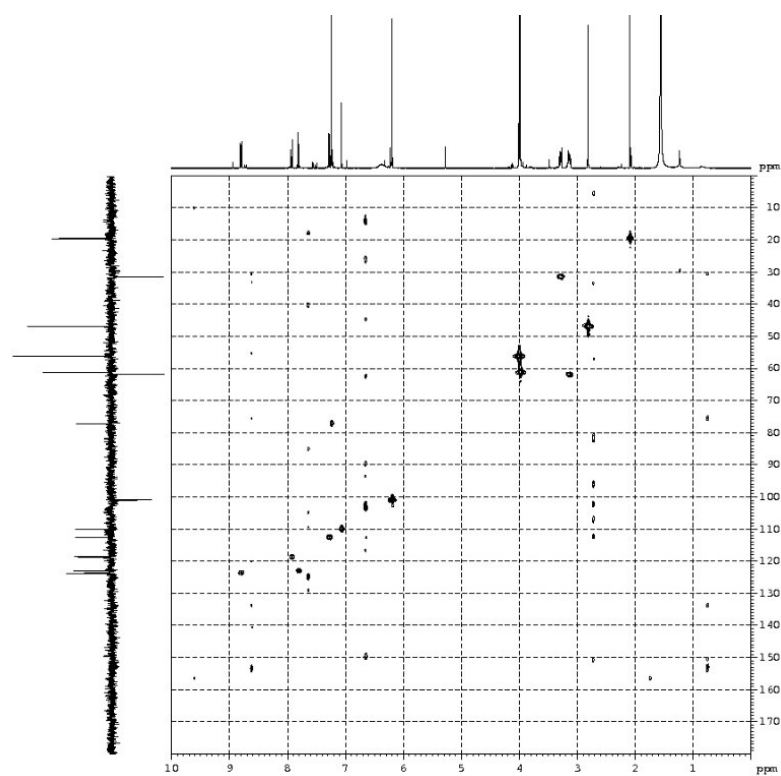

Figure S156. HMBC spectrum of *N*-acetamideseccrebanine (**10**) in CDCl<sub>3</sub>

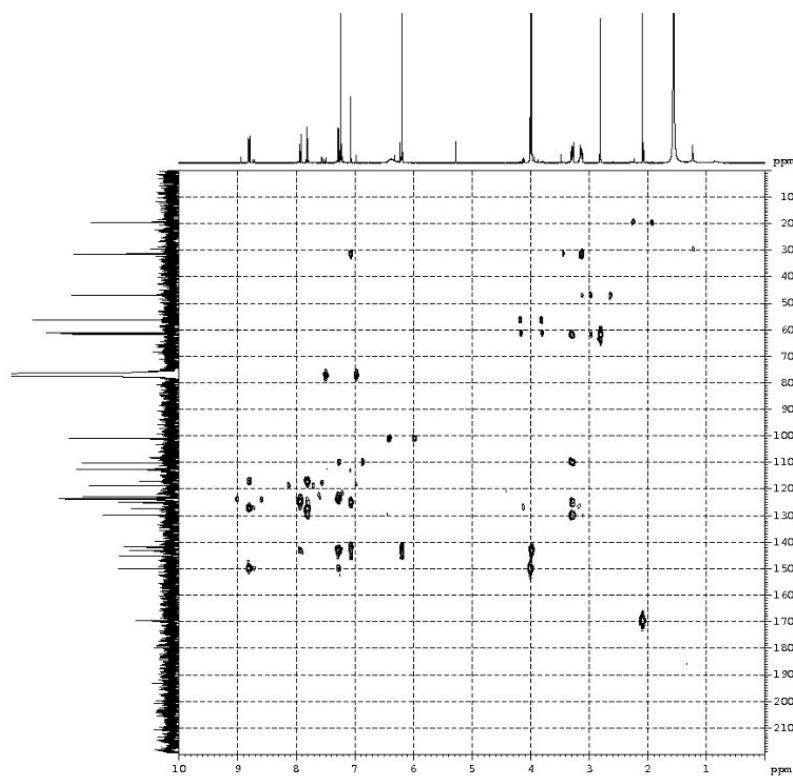

Figure S157. HMBC spectrum of *N*-acetamideseccrebanine (**10**) in  $\text{CDCl}_3$

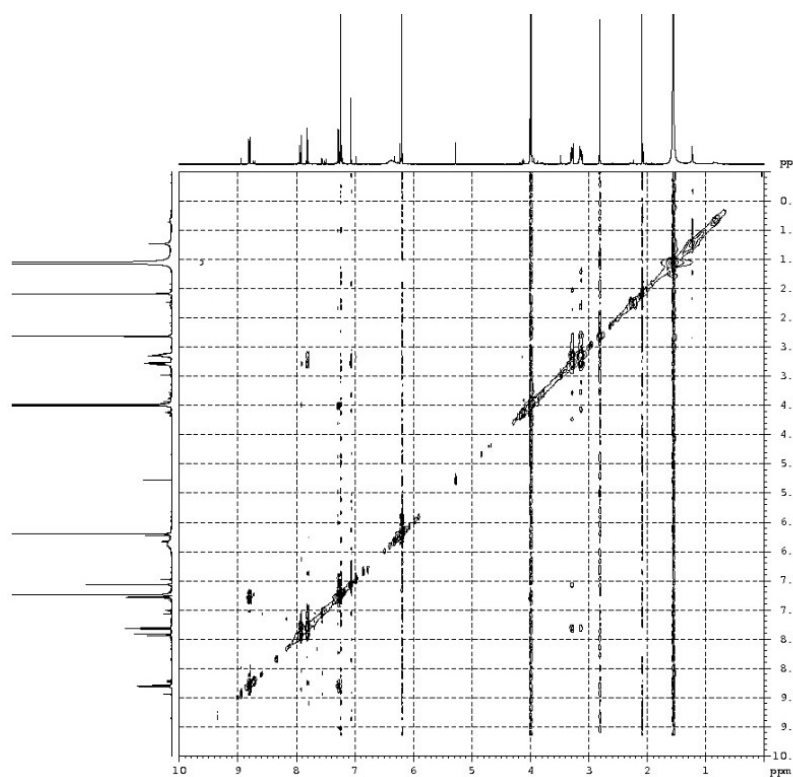

Figure S158. NOESY spectrum of *N*-acetamideseccrebanine (**10**) in  $\text{CDCl}_3$



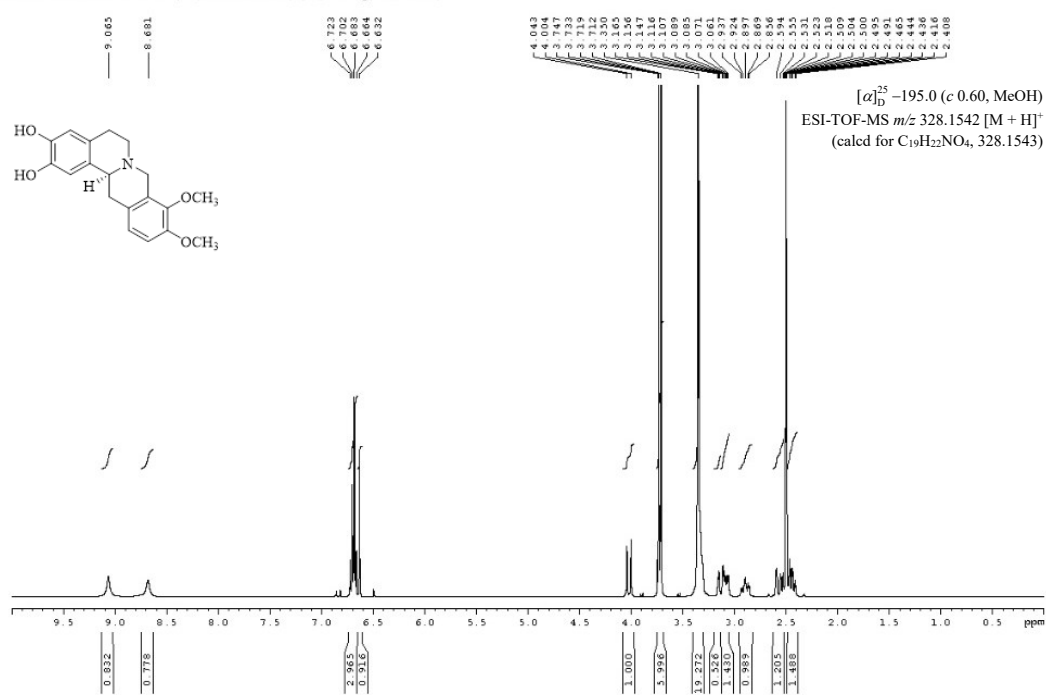

**Figure S159.**  $^1H$  NMR spectrum (DMSO- $d_6$ , 400 MHz) of 2,3-didemethyltetrahydropalmatine (**11**)

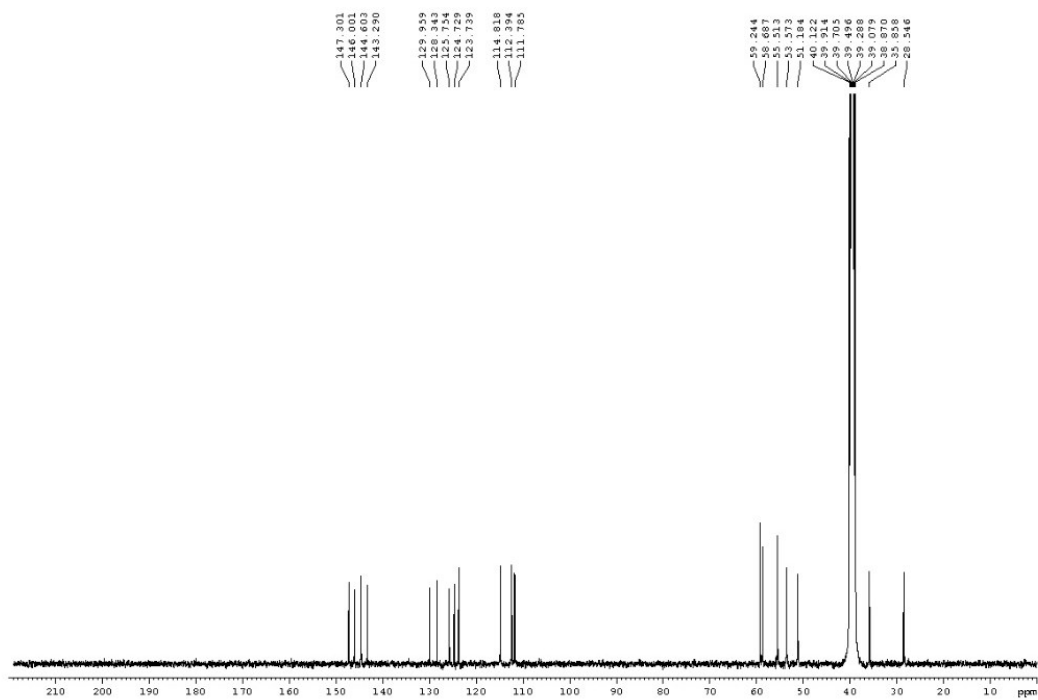

**Figure S160.**  $^{13}C$  NMR spectrum (DMSO- $d_6$ , 100 MHz) of 2,3-didemethyltetrahydropalmatine (**11**)

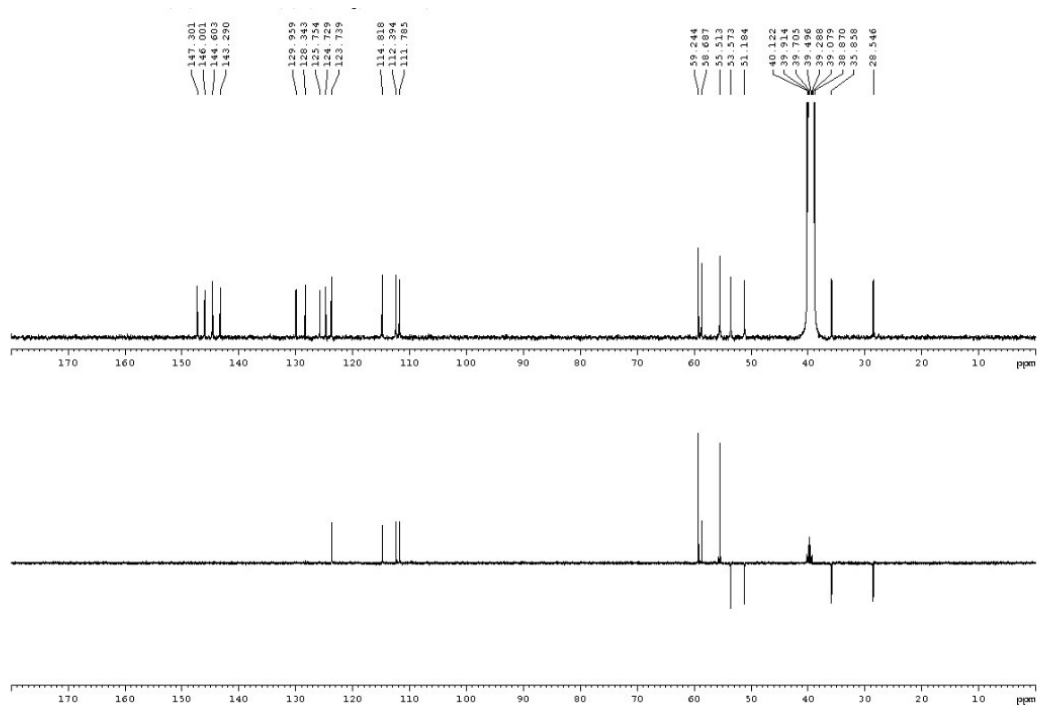

**Figure S161.** DEPT135 spectrum (DMSO- $d_6$ , 100 MHz) of 2,3-didemethyltetrahydropalmatine (**11**)

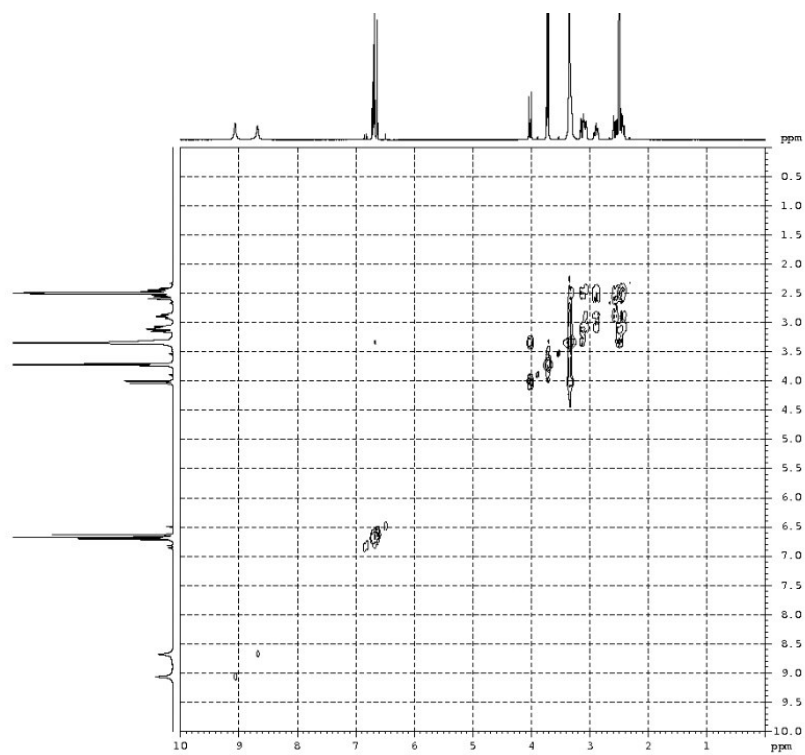

**Figure S162.** COSY spectrum of 2,3-didemethyltetrahydropalmatine (**11**) in DMSO- $d_6$

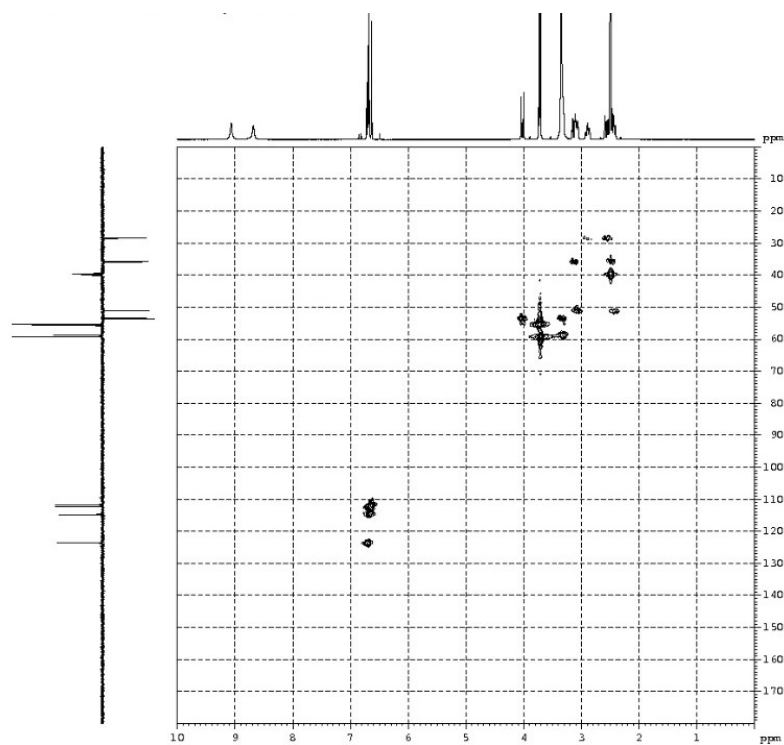

**Figure S163.** HMQC spectrum of 2,3-didemethyltetrahydropalmatine (**11**) in DMSO-*d*<sub>6</sub>

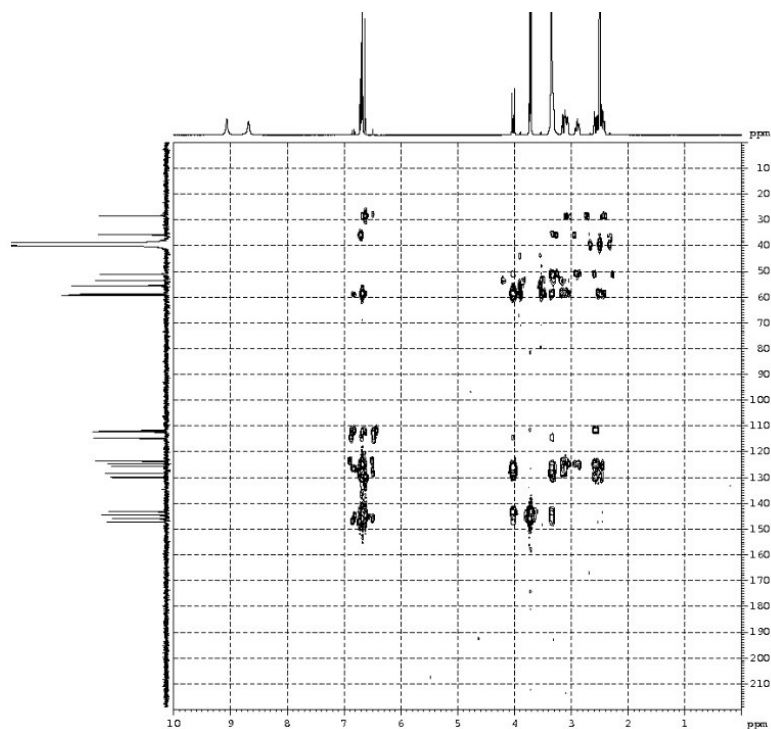

**Figure S164.** HMBC spectrum of 2,3-didemethyltetrahydropalmatine (**11**) in DMSO-*d*<sub>6</sub>

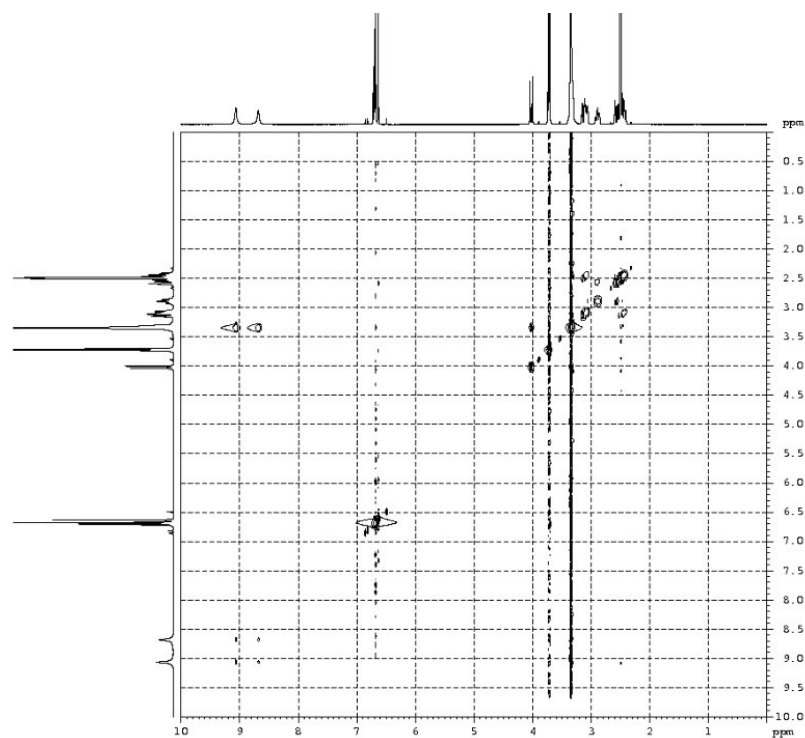

**Figure S165.** NOESY spectrum of 2,3-didemethyltetrahydropalmatine (11) in DMSO-*d*<sub>6</sub>

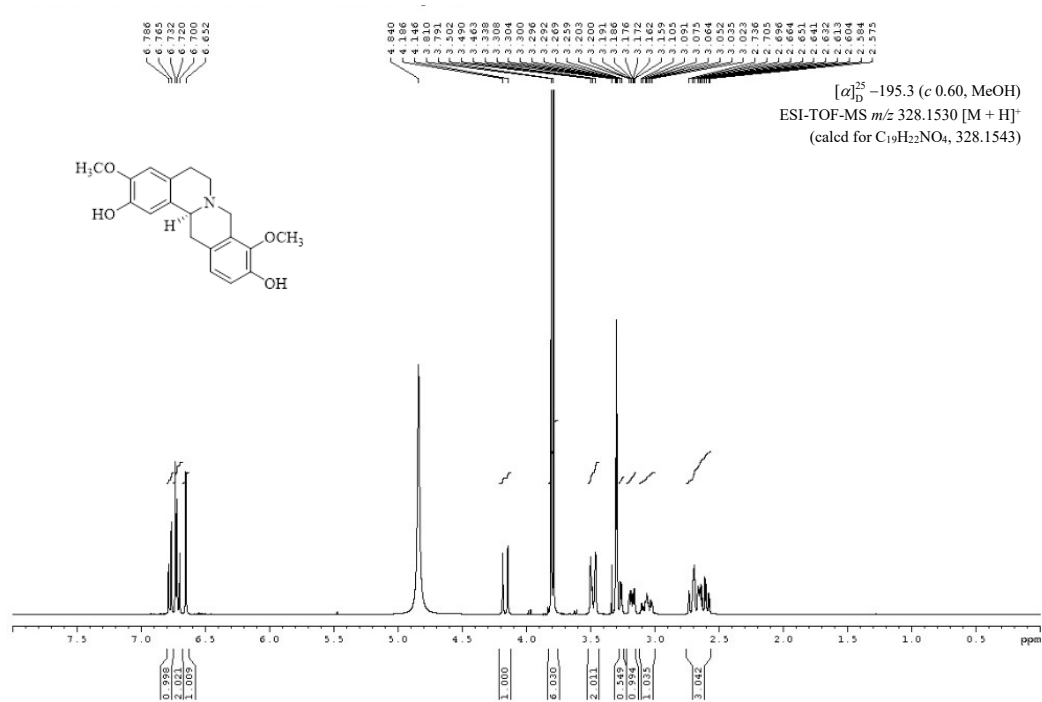

**Figure S166.** <sup>1</sup>H NMR spectrum (CD<sub>3</sub>OD, 400 MHz) of stepholidine (12)

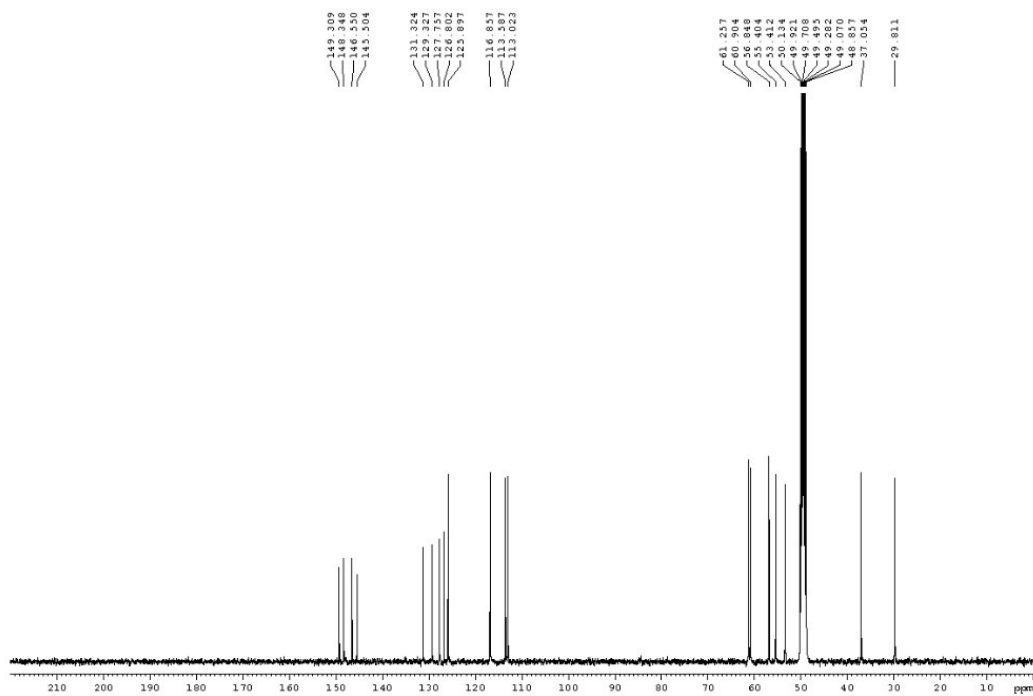

Figure S167.  $^{13}\text{C}$  NMR spectrum ( $\text{CD}_3\text{OD}$ , 100 MHz) of stepholidine (**12**)

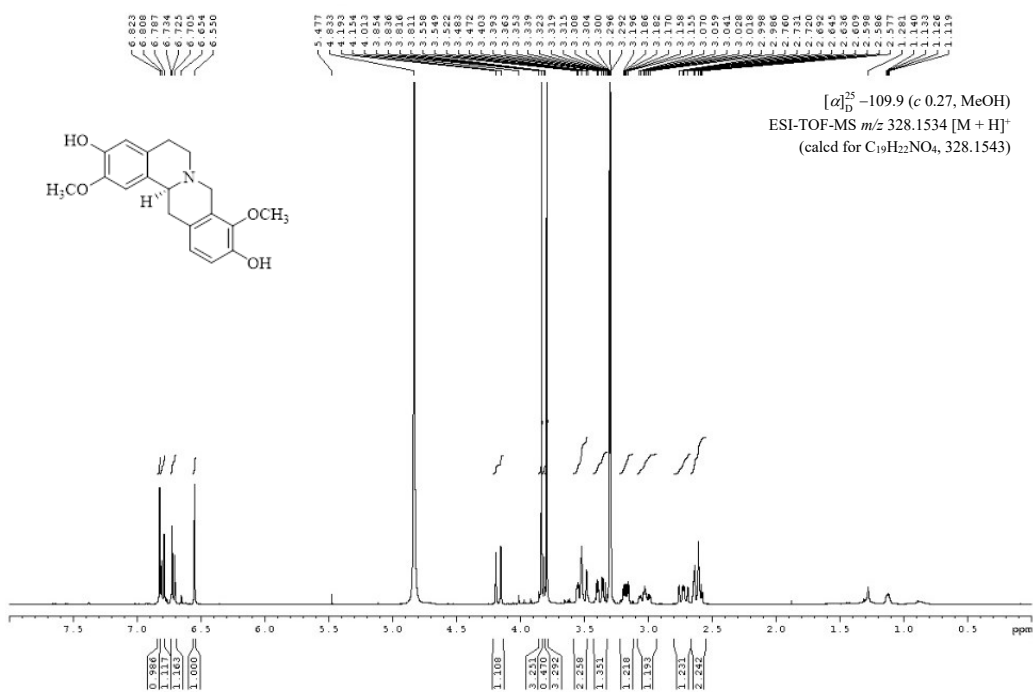

Figure S168.  $^1\text{H}$  NMR spectrum ( $\text{CD}_3\text{OD}$ , 400 MHz) of discretamine (**13**)

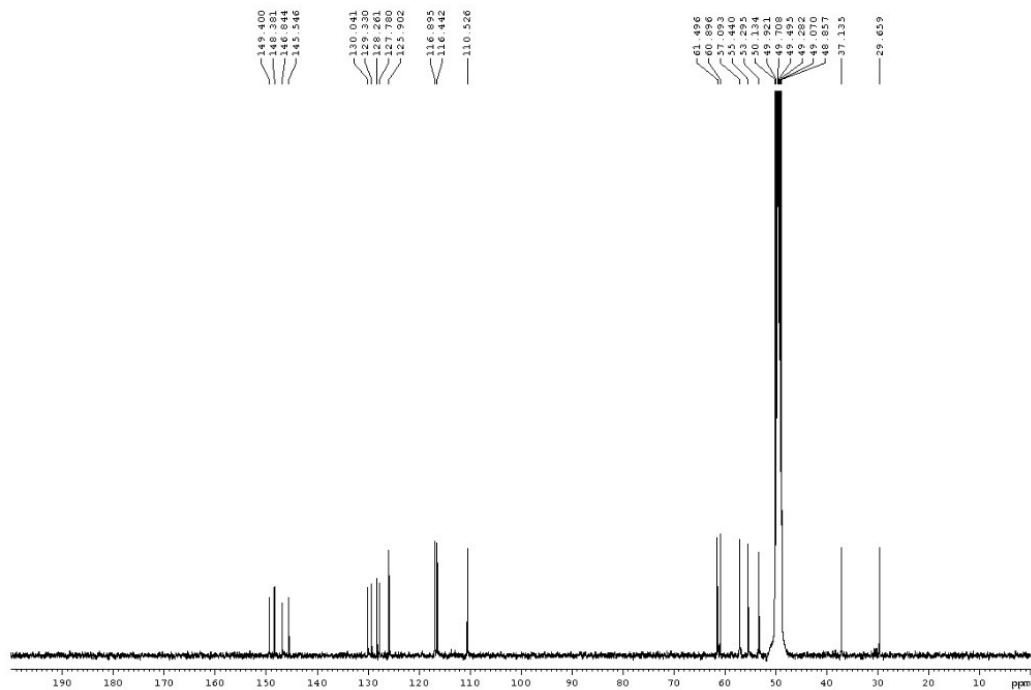

Figure S169.  $^{13}\text{C}$  NMR spectrum ( $\text{CD}_3\text{OD}$ , 100 MHz) of discretamine (13)

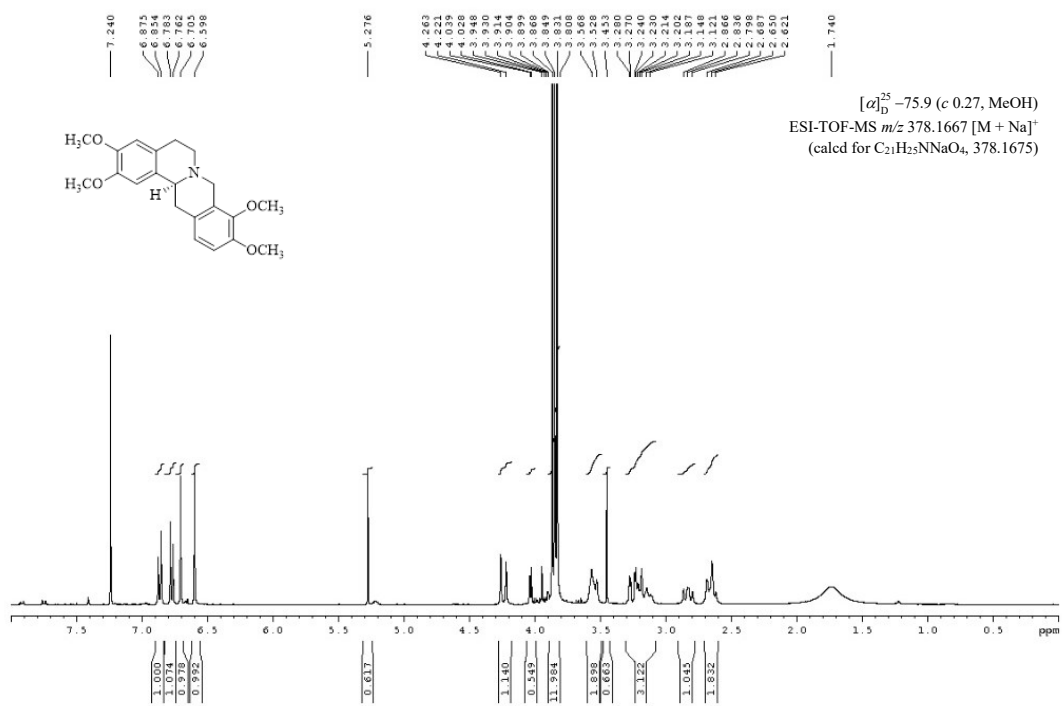

Figure S170.  $^1\text{H}$  NMR spectrum ( $\text{CDCl}_3$ , 400 MHz) of tetrahydropalmatine (14)

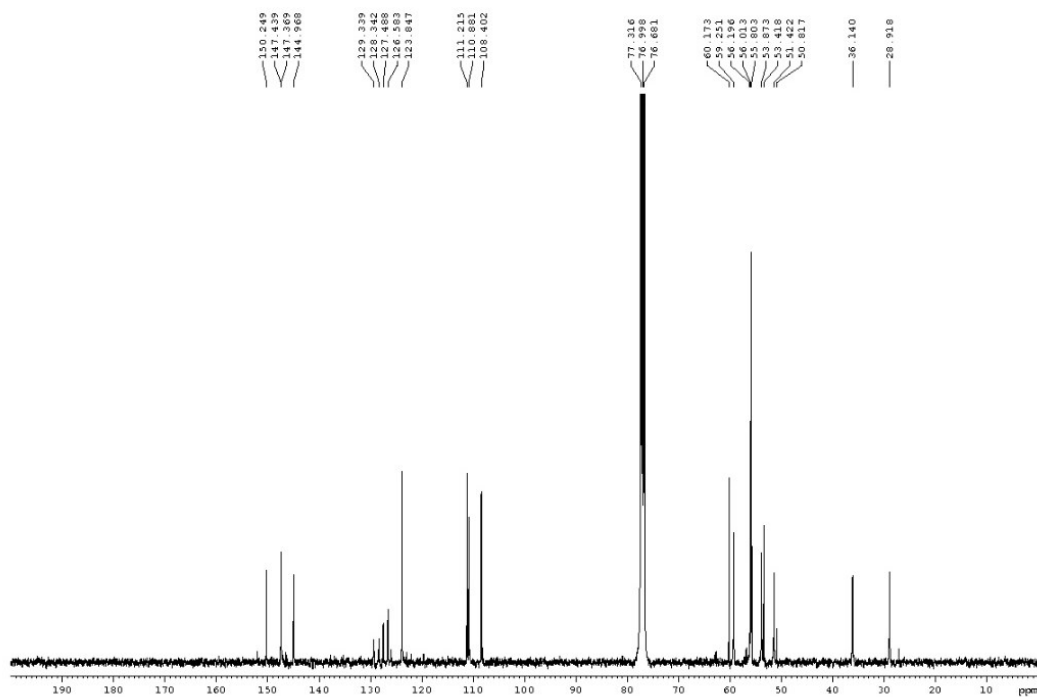

Figure S171.  $^{13}\text{C}$  NMR spectrum ( $\text{CDCl}_3$ , 100 MHz) of tetrahydropalmatine (14)

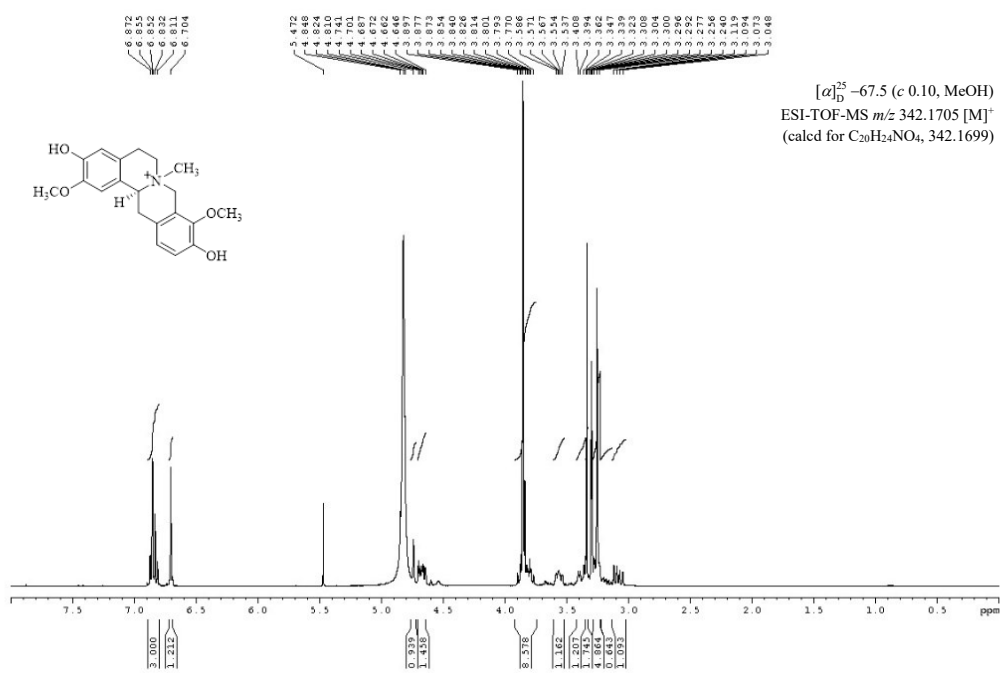

Figure S172.  $^1\text{H}$  NMR spectrum ( $\text{CD}_3\text{OD}$ , 400 MHz) of *N*-methylstepholidine (15)

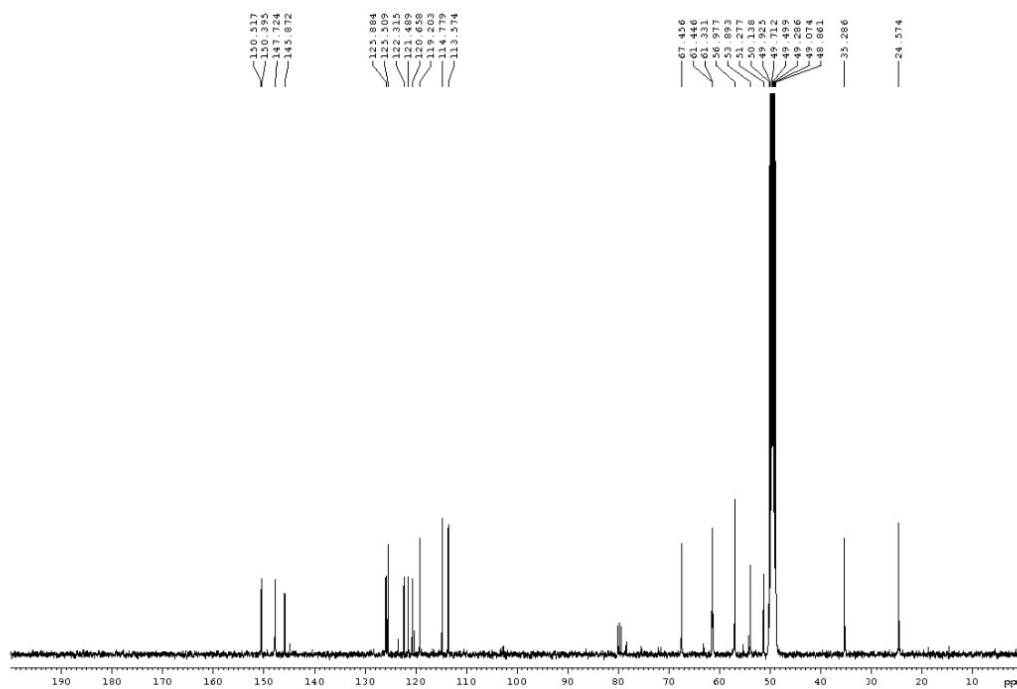

Figure S173.  $^{13}\text{C}$  NMR spectrum (CD<sub>3</sub>OD, 100 MHz) of *N*-methylstepholidine (15)

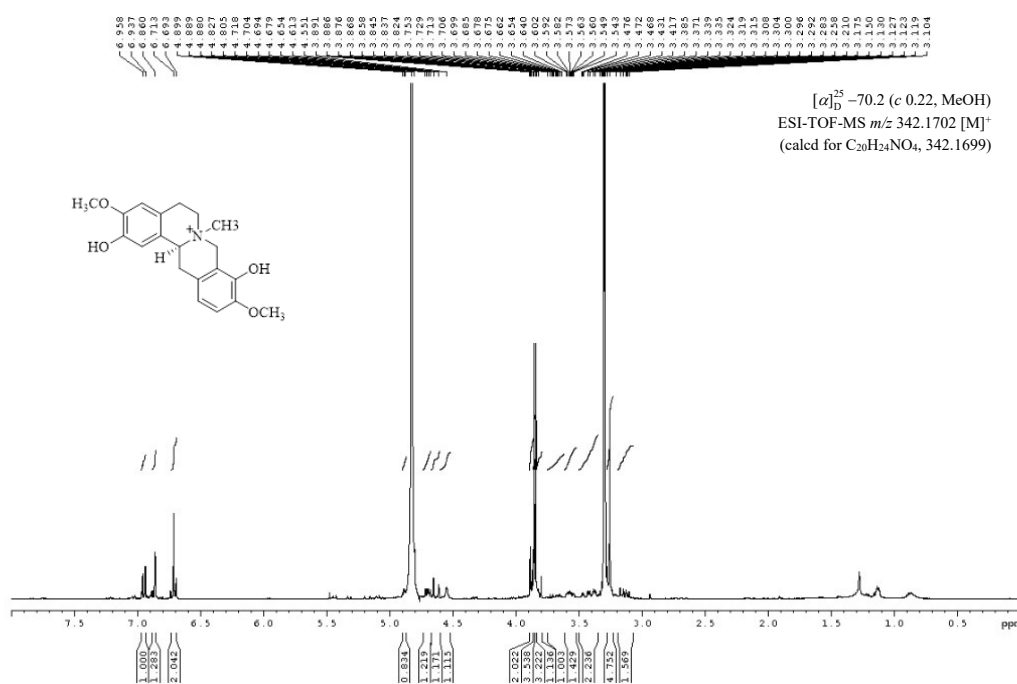

Figure S174.  $^1\text{H}$  NMR spectrum (CD<sub>3</sub>OD, 400 MHz) of cyclanoline (16)



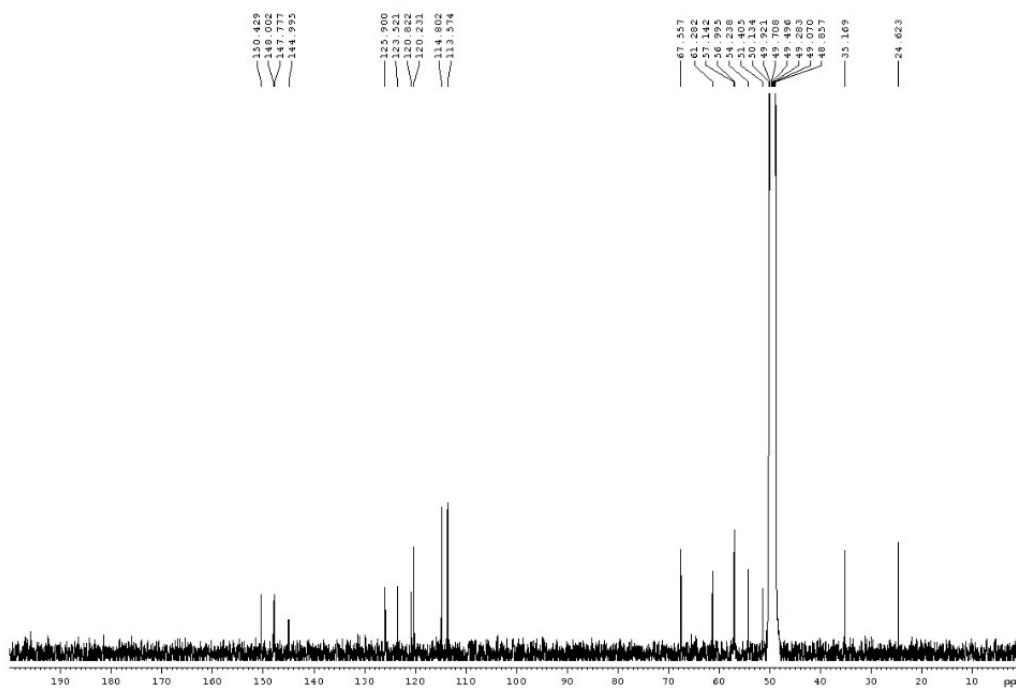

**Figure S175.**  $^{13}\text{C}$  NMR spectrum ( $\text{CD}_3\text{OD}$ , 100 MHz) of cyclanoline (**16**)

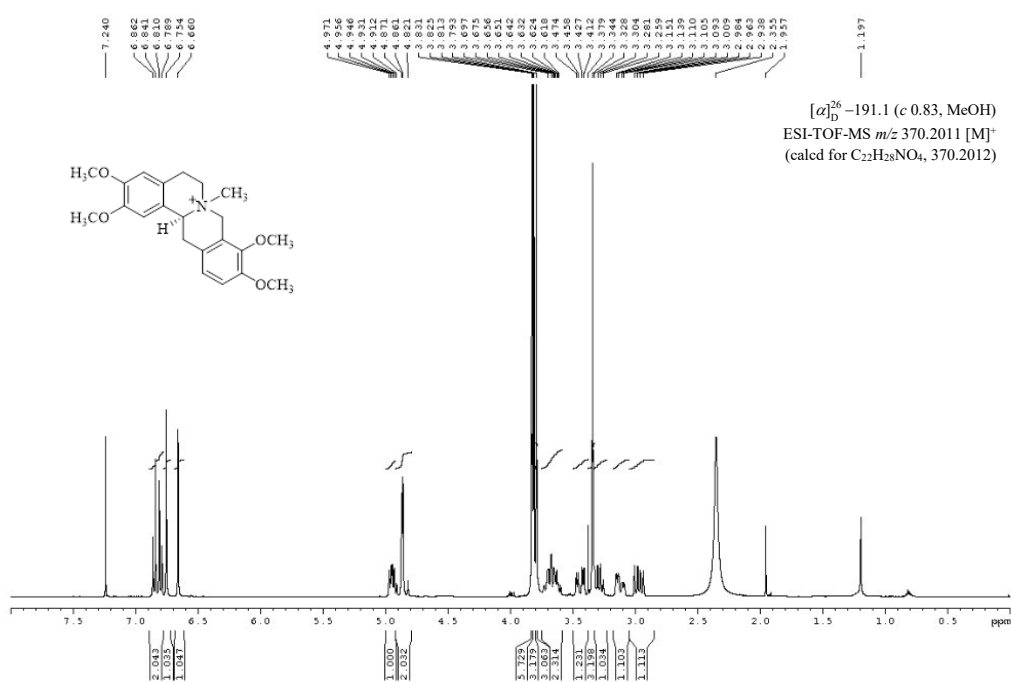

**Figure S176.**  $^1\text{H}$  NMR spectrum ( $\text{CDCl}_3$  + 5 drops  $\text{CD}_3\text{OD}$ , 400 MHz) of *N*-methyltetrahydro-palmatine (**17**)

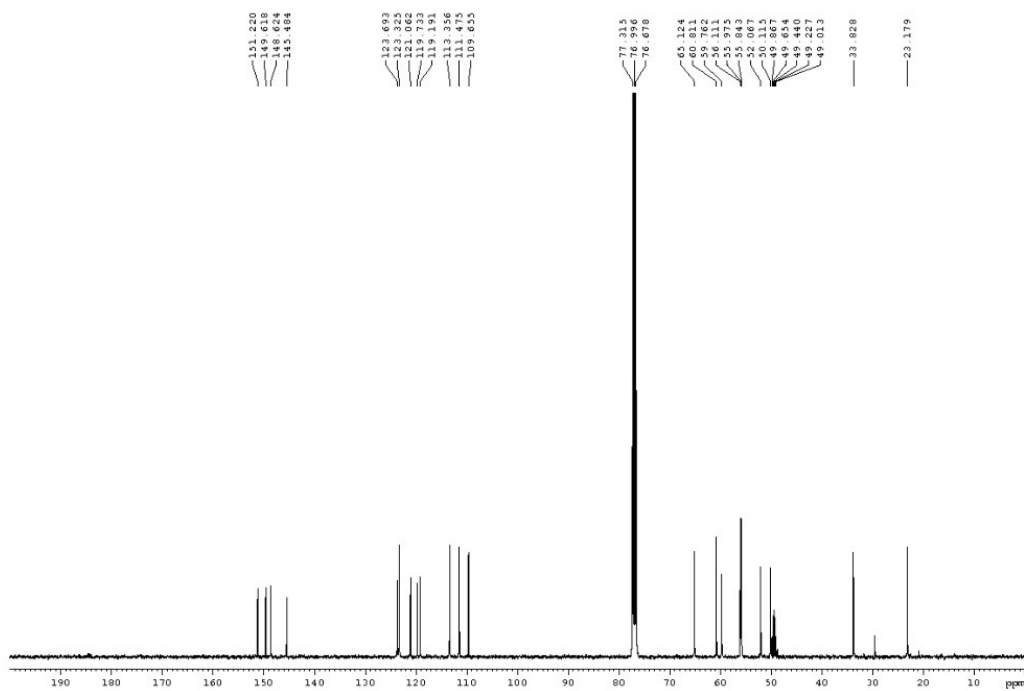

**Figure S177.**  $^{13}\text{C}$  NMR spectrum ( $\text{CDCl}_3$  + 5 drops  $\text{CD}_3\text{OD}$ , 100 MHz) of *N*-methyltetrahydro-palmatine (**17**)

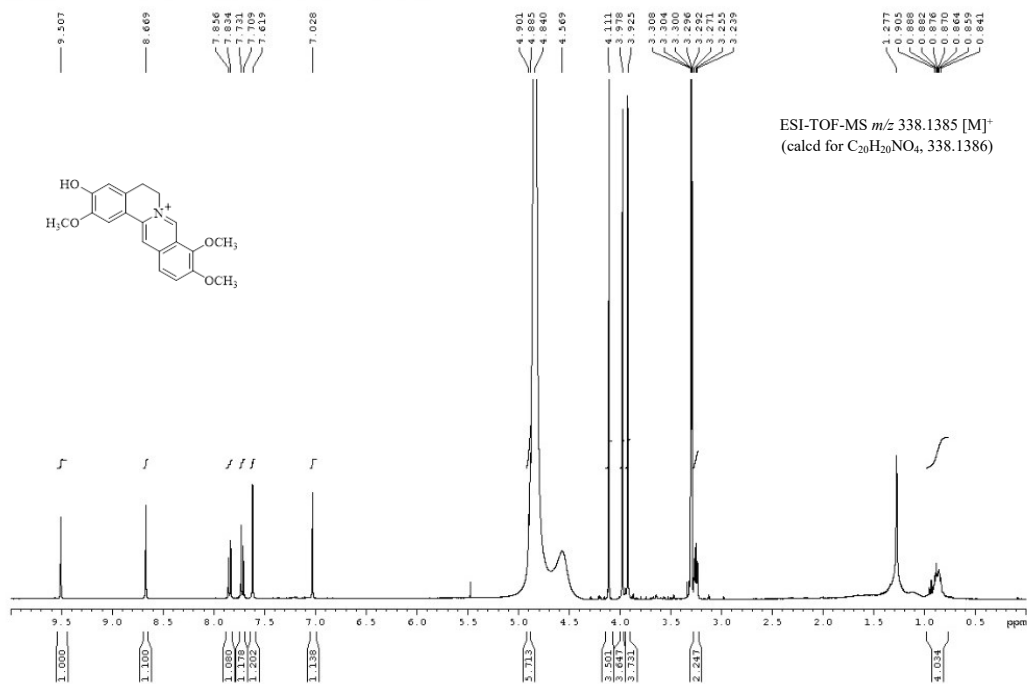

**Figure S178.**  $^1\text{H}$  NMR spectrum ( $\text{CD}_3\text{OD}$ , 400 MHz) of jatrorrhizine (**18**)

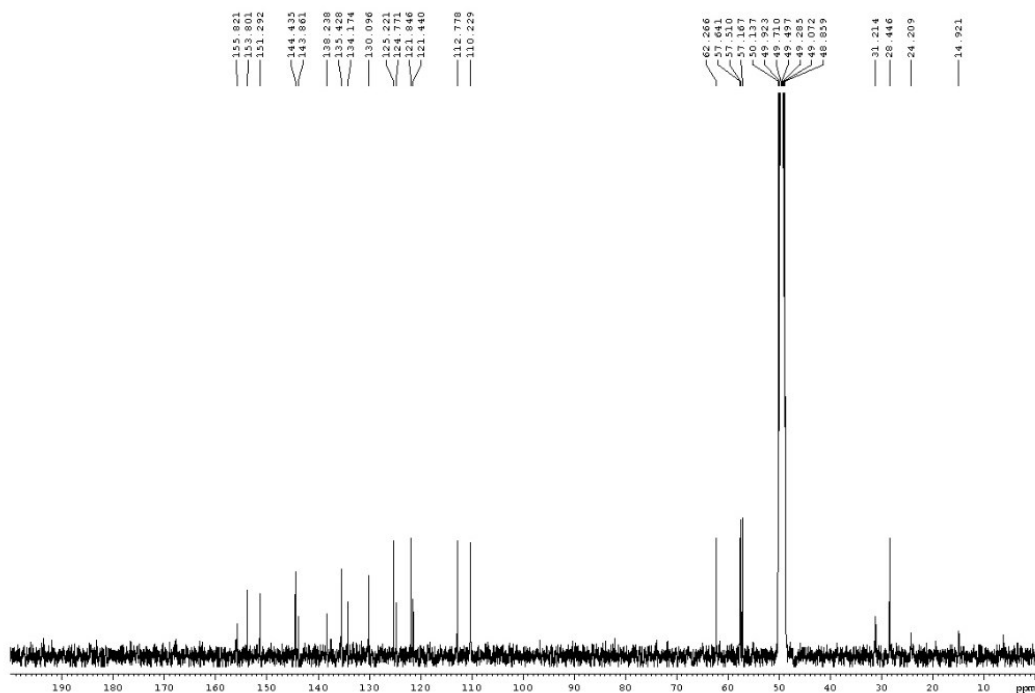

Figure S179.  $^{13}\text{C}$  NMR spectrum ( $\text{CD}_3\text{OD}$ , 100 MHz) of jatrorrhizine (18)

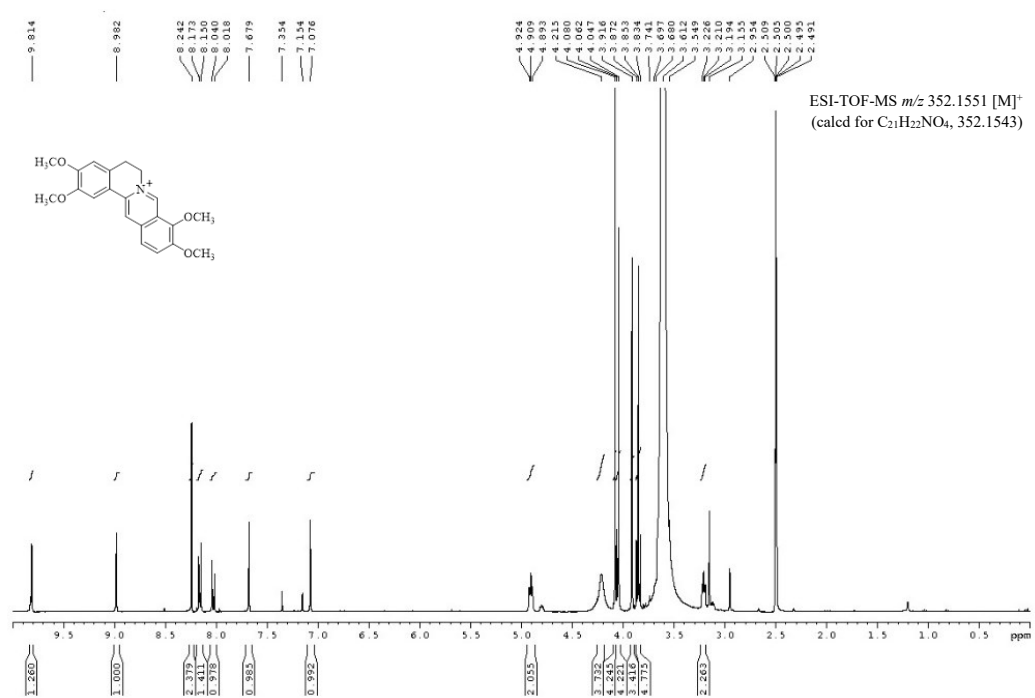

Figure S180.  $^1\text{H}$  NMR spectrum ( $\text{DMSO}-d_6$ , 400 MHz) of palmatine (19)

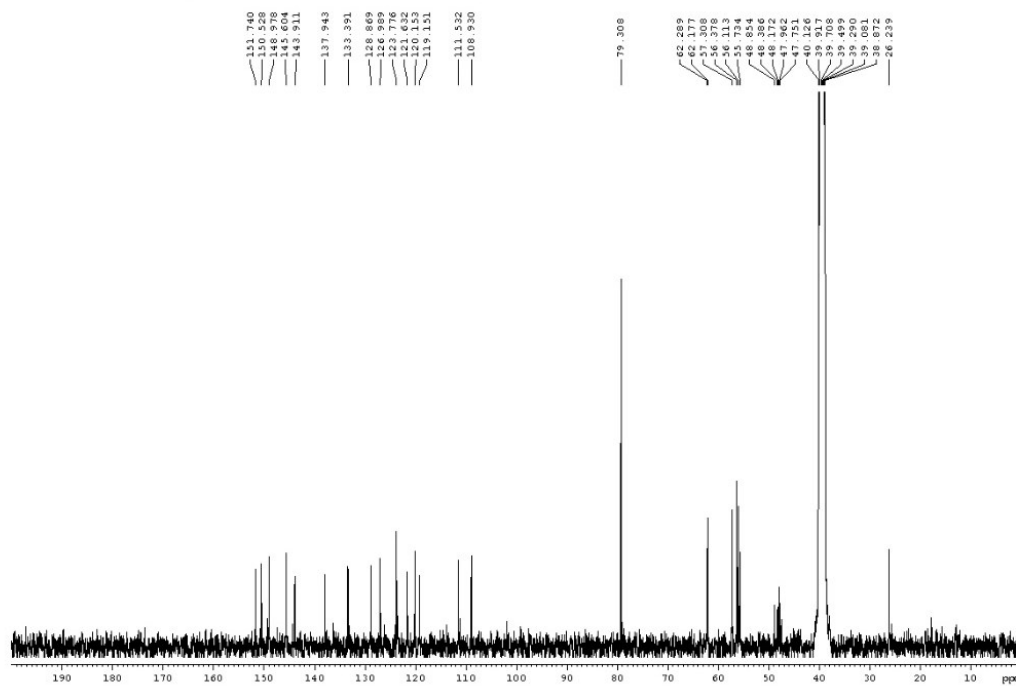

Figure S181.  $^{13}\text{C}$  NMR spectrum ( $\text{DMSO}-d_6$ , 100 MHz) of palmatine (19)

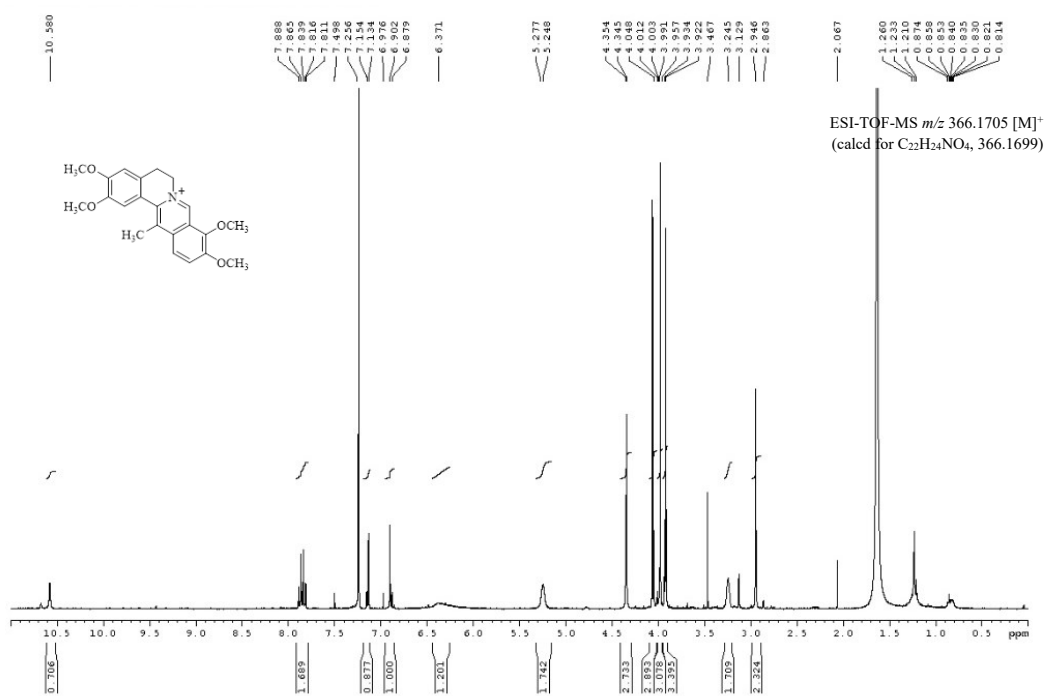

Figure S182.  $^1\text{H}$  NMR spectrum ( $\text{CDCl}_3$ , 400 MHz) of dehydrocorydaline (20)

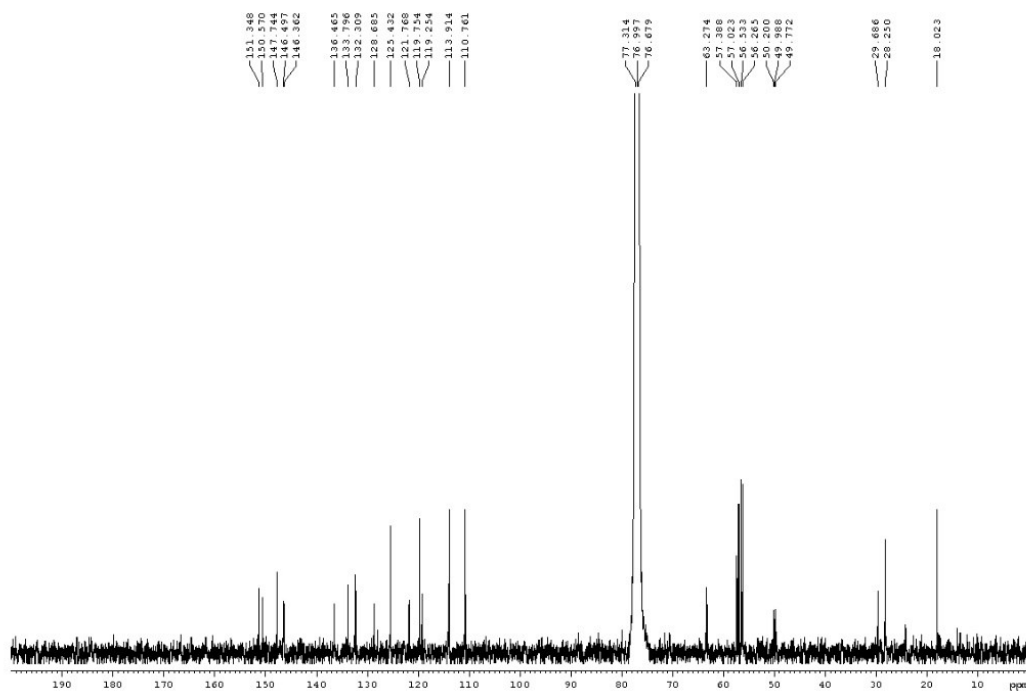

Figure S183.  $^{13}\text{C}$  NMR spectrum ( $\text{CDCl}_3$ , 100 MHz) of dehydrocorydaline (**20**)

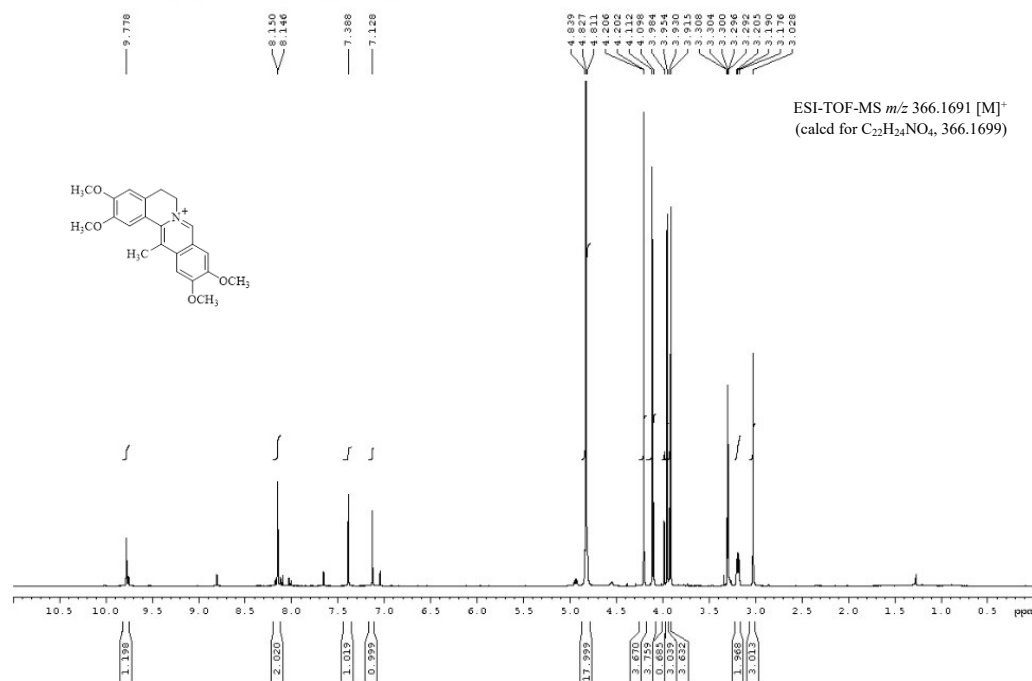

Figure S184.  $^1\text{H}$  NMR spectrum ( $\text{CD}_3\text{OD}$ , 400 MHz) of pseudodehydrocorydaline (**21**)

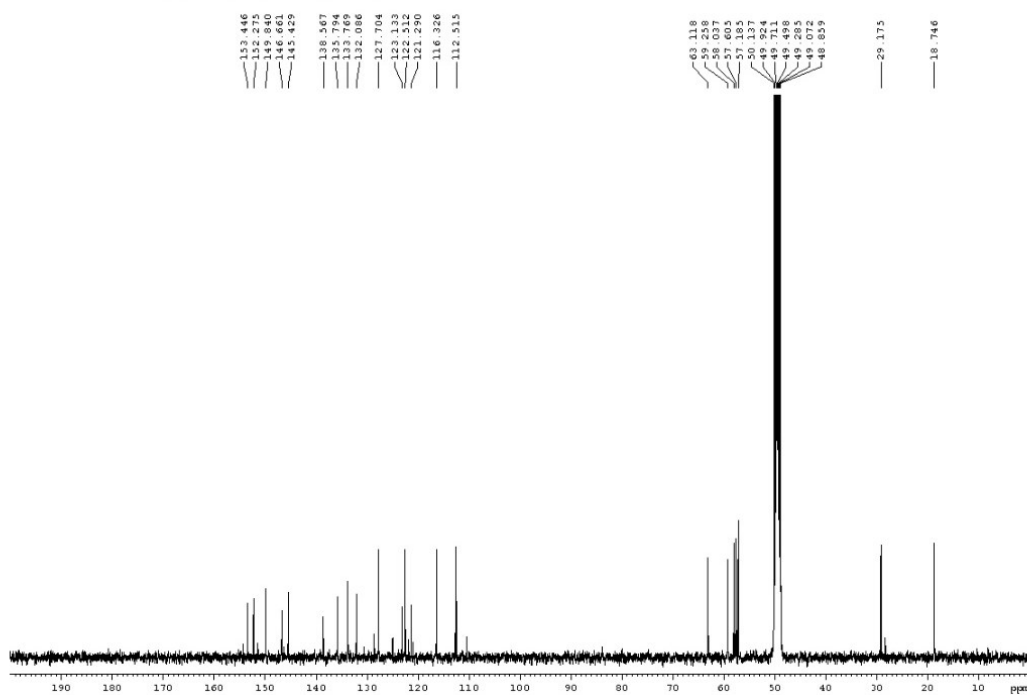

Figure S185.  $^{13}\text{C}$  NMR spectrum ( $\text{CD}_3\text{OD}$ , 100 MHz) of pseudodehydrocorydaline (21)

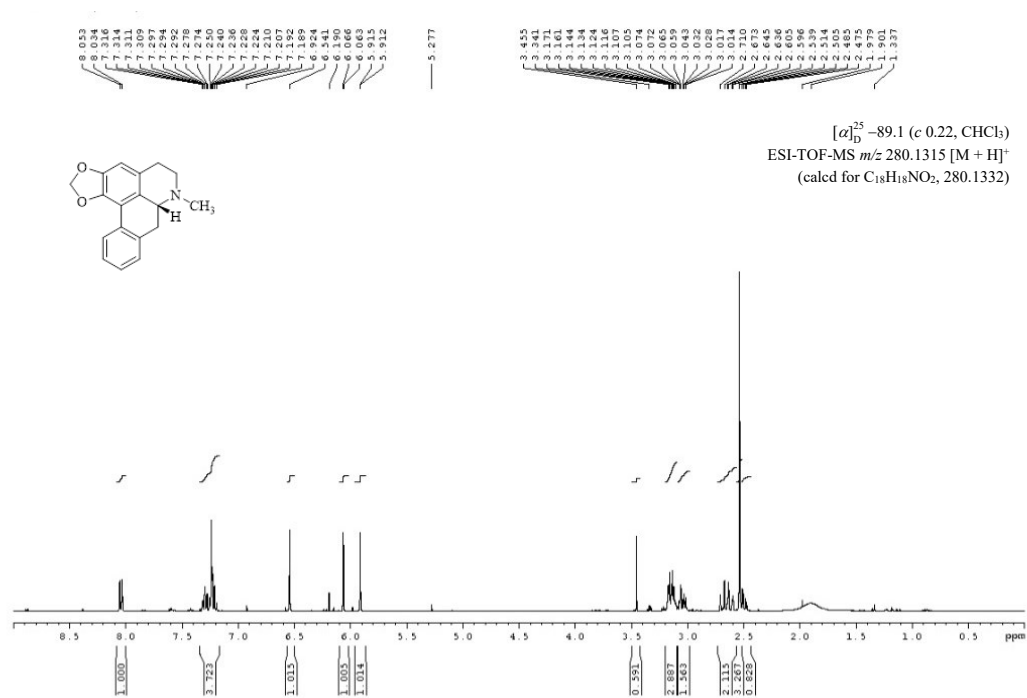

Figure S186.  $^1\text{H}$  NMR spectrum ( $\text{CDCl}_3$ , 400 MHz) of roemerine (22)

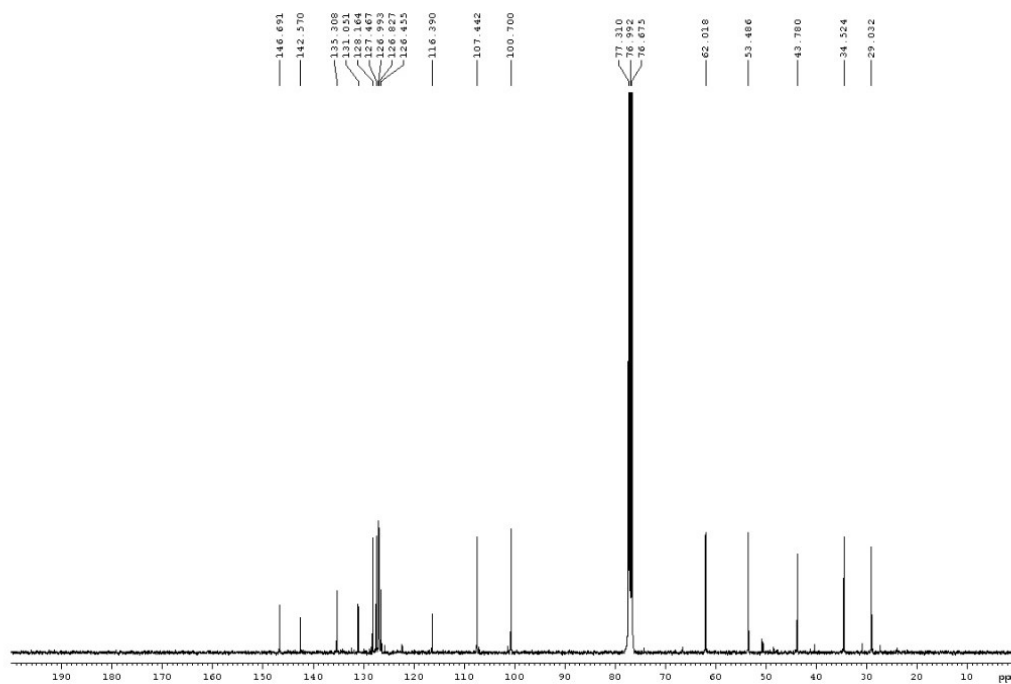

Figure S187.  $^{13}\text{C}$  NMR spectrum ( $\text{CDCl}_3$ , 100 MHz) of roemerine (**22**)

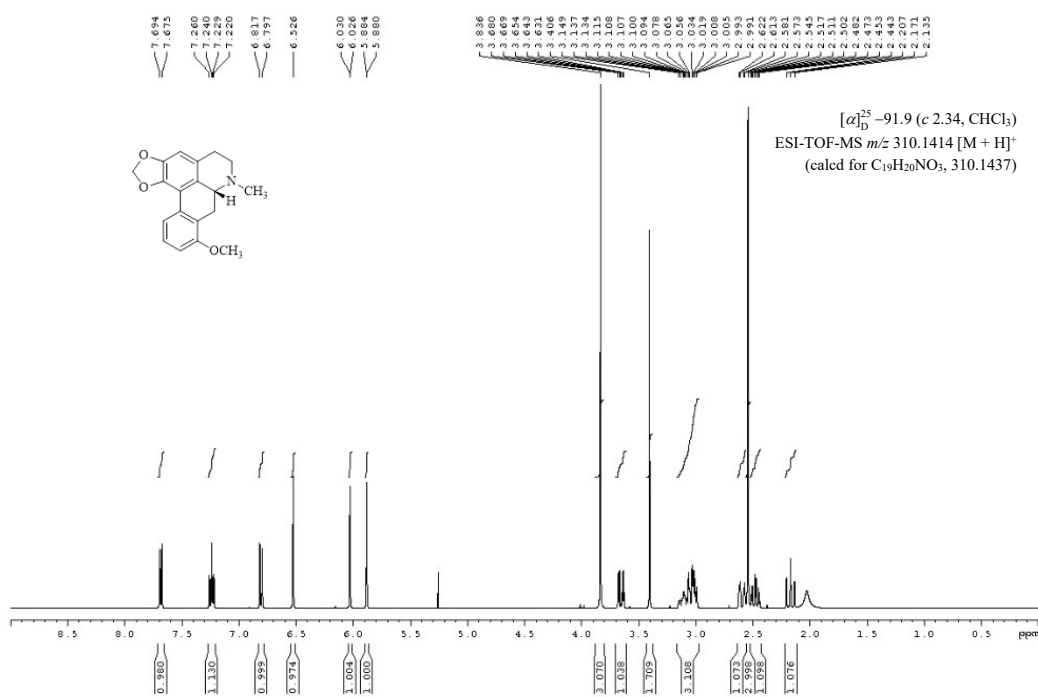

Figure S188.  $^1\text{H}$  NMR spectrum ( $\text{CDCl}_3$ , 400 MHz) of (-)-stephanine (**23**)

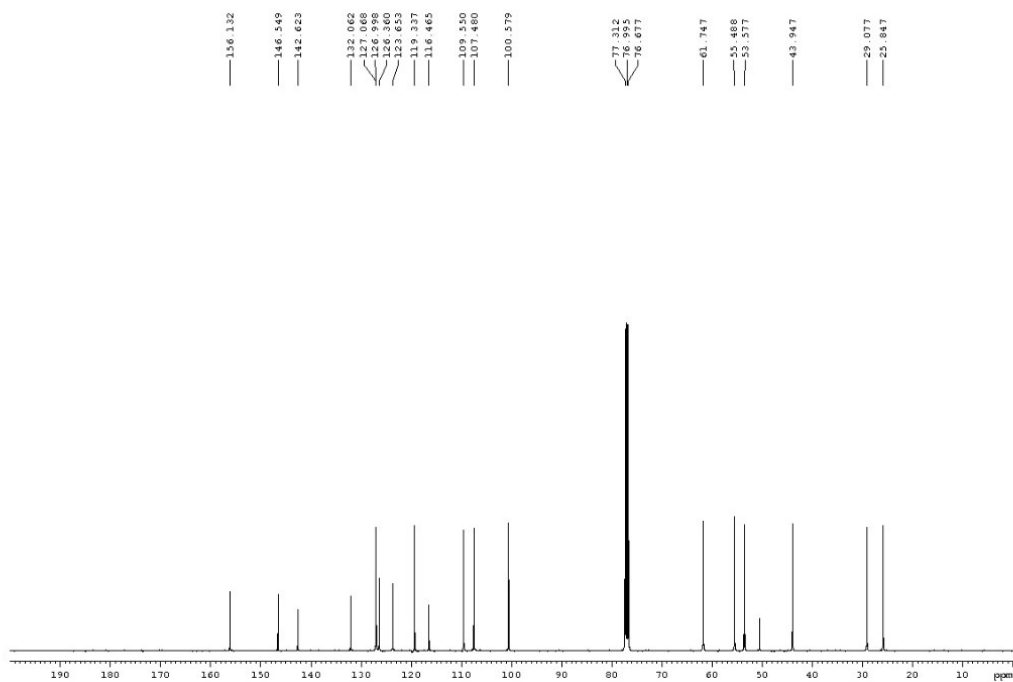

Figure S189.  $^{13}\text{C}$  NMR spectrum ( $\text{CDCl}_3$ , 100 MHz) of (-)-stephanine (23)

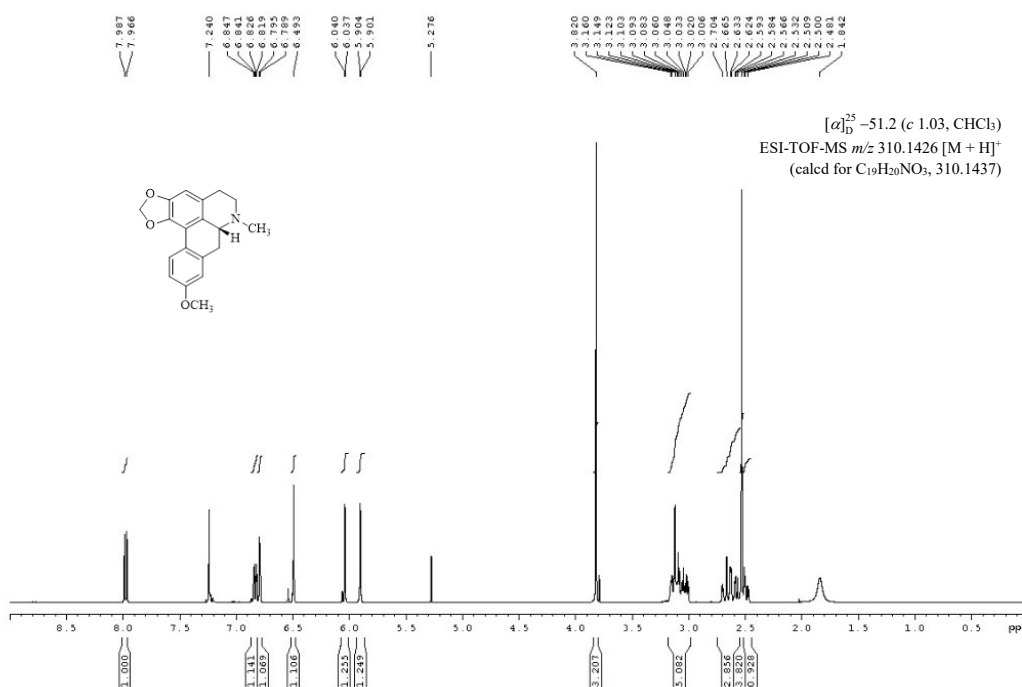

Figure S190.  $^1\text{H}$  NMR spectrum ( $\text{CDCl}_3$ , 400 MHz) of (-)-isolaureline (24)



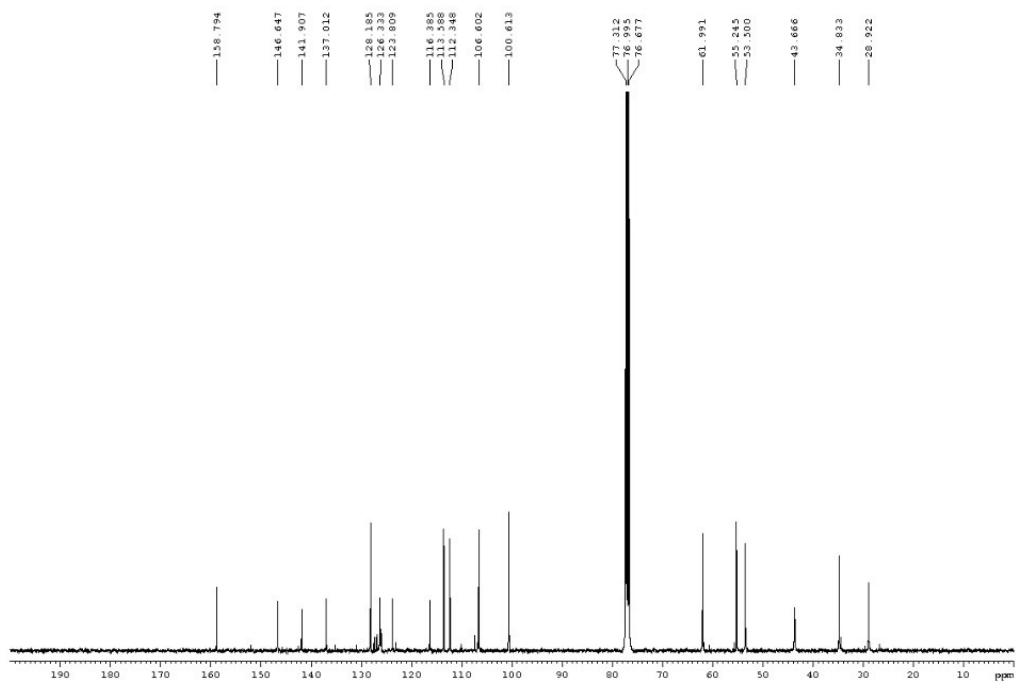

Figure S191.  $^{13}\text{C}$  NMR spectrum ( $\text{CDCl}_3$ , 100 MHz) of (-)-isolaureline (**24**)

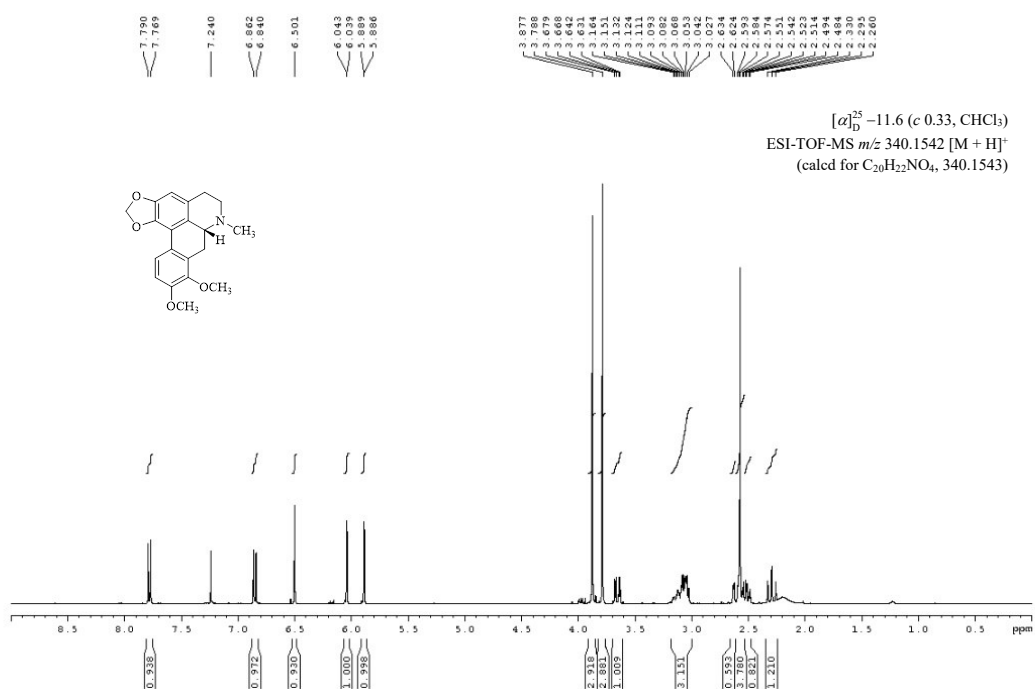

Figure S192.  $^1\text{H}$  NMR spectrum ( $\text{CDCl}_3$ , 400 MHz) of crebanine (**25**)

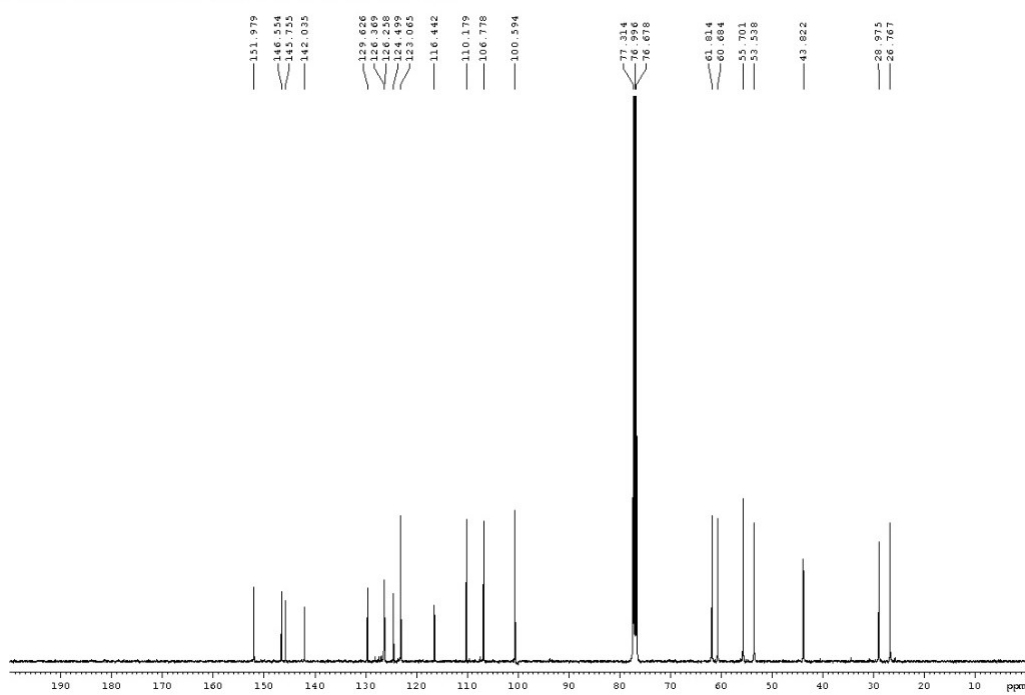

Figure S193.  $^{13}\text{C}$  NMR spectrum (CDCl<sub>3</sub>, 100 MHz) of crebanine (25)

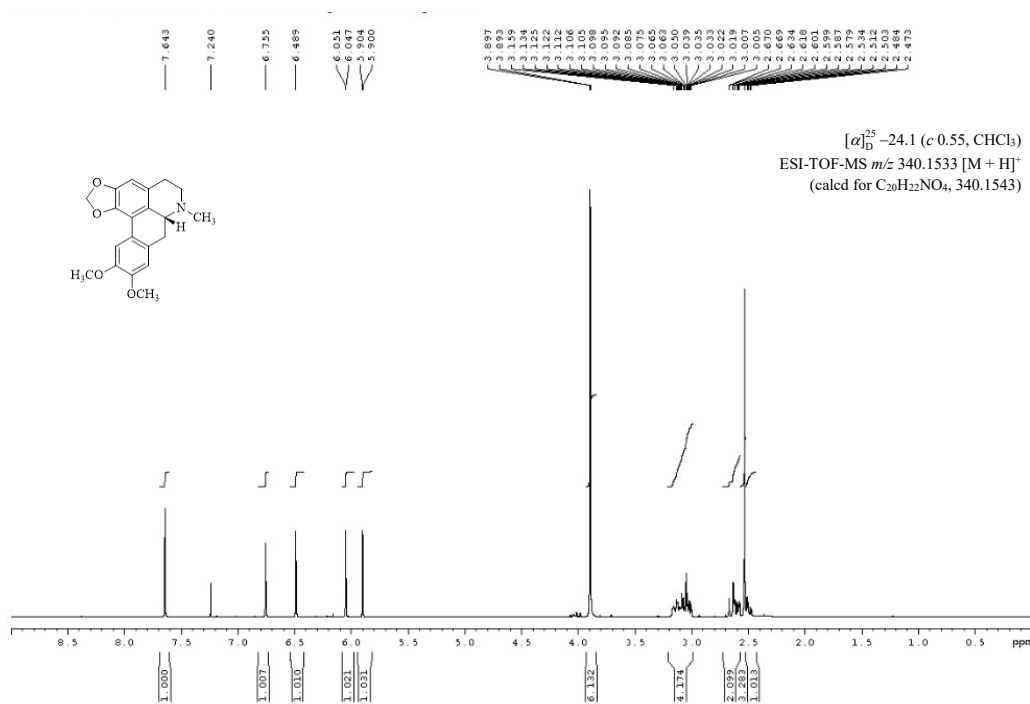

Figure S194.  $^1\text{H}$  NMR spectrum (CDCl<sub>3</sub> + 5 drops CD<sub>3</sub>OD, 400 MHz) of dicentrine (26)

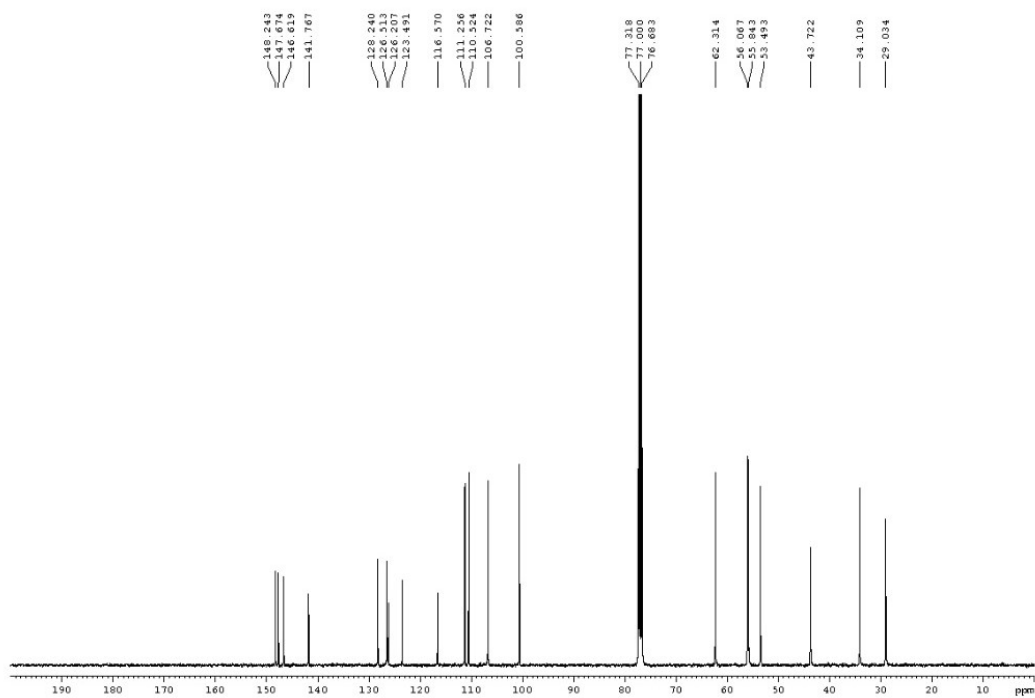

**Figure S195.** <sup>13</sup>C NMR spectrum (CDCl<sub>3</sub> + 5 drops CD<sub>3</sub>OD, 100 MHz) of dicentrine (26)

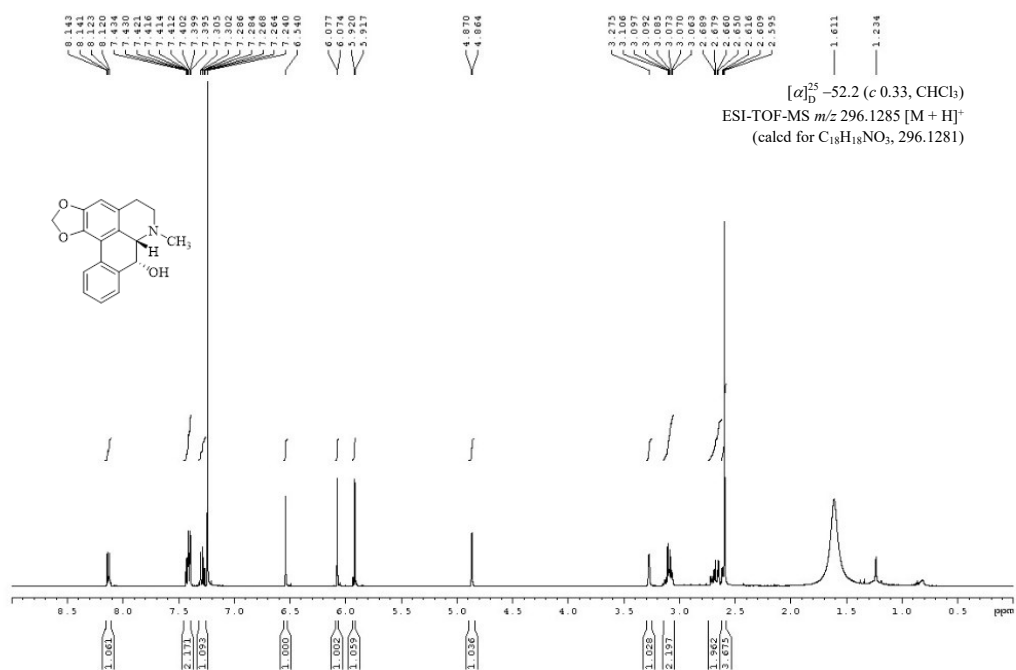

**Figure S196.** <sup>1</sup>H NMR spectrum (CDCl<sub>3</sub>, 400 MHz) of (-)-ushinsunine (27)

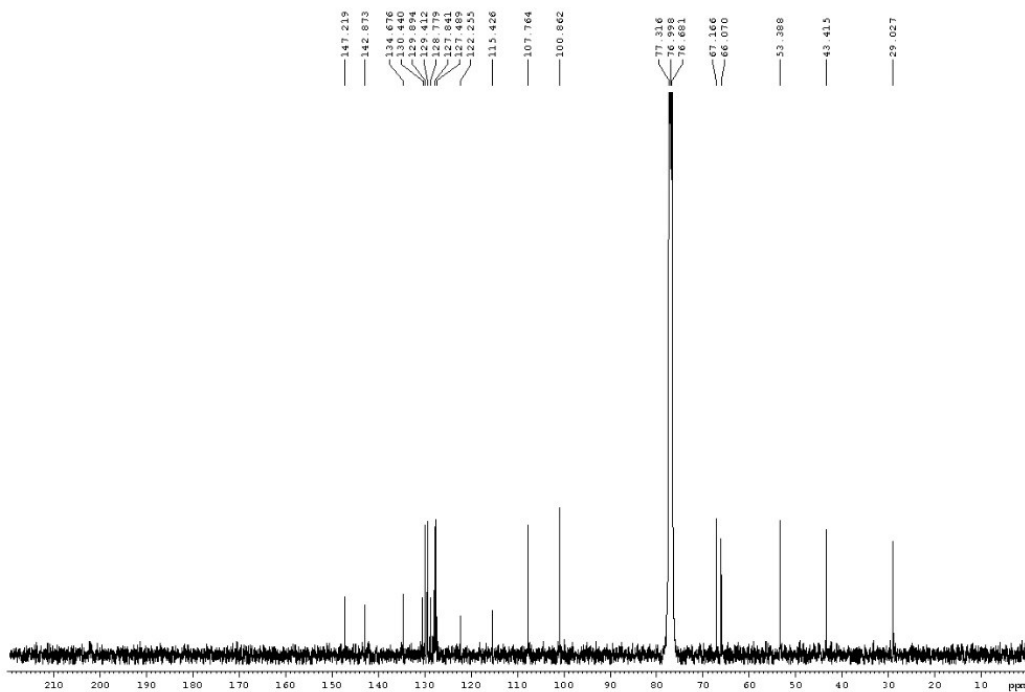

Figure S197.  $^{13}\text{C}$  NMR spectrum ( $\text{CDCl}_3$ , 100 MHz) of (-)-ushinsunine (27)

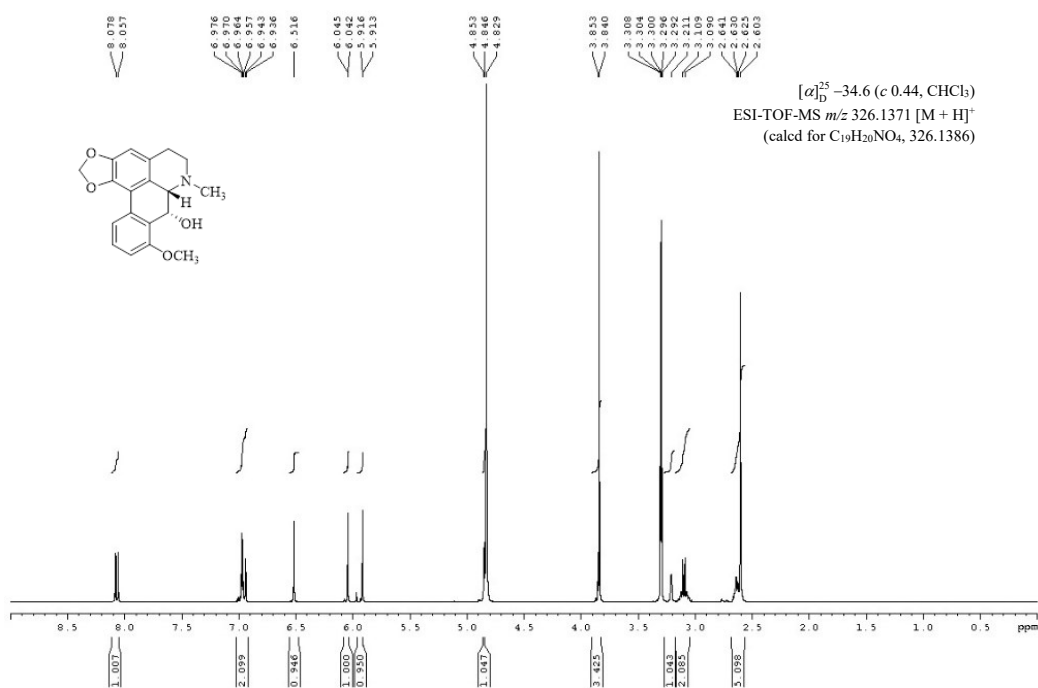

Figure S198.  $^1\text{H}$  NMR spectrum ( $\text{CD}_3\text{OD}$ , 400 MHz) of (-)-ayuthianine (28)

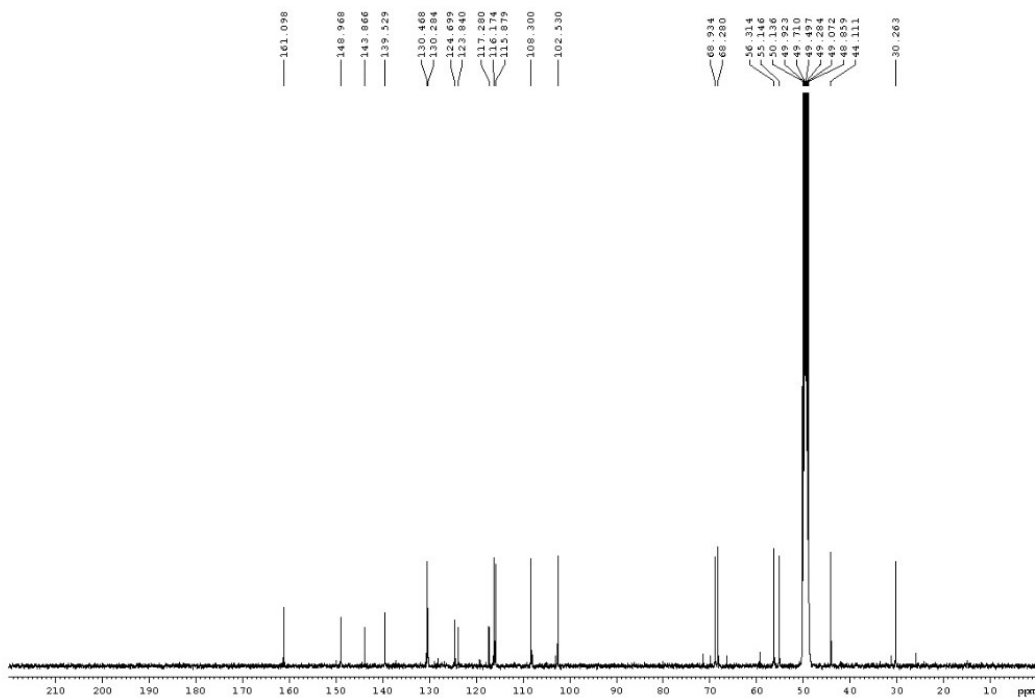

Figure S199.  $^{13}\text{C}$  NMR spectrum (CD<sub>3</sub>OD, 100 MHz) of (-)-ayuthianine (28)

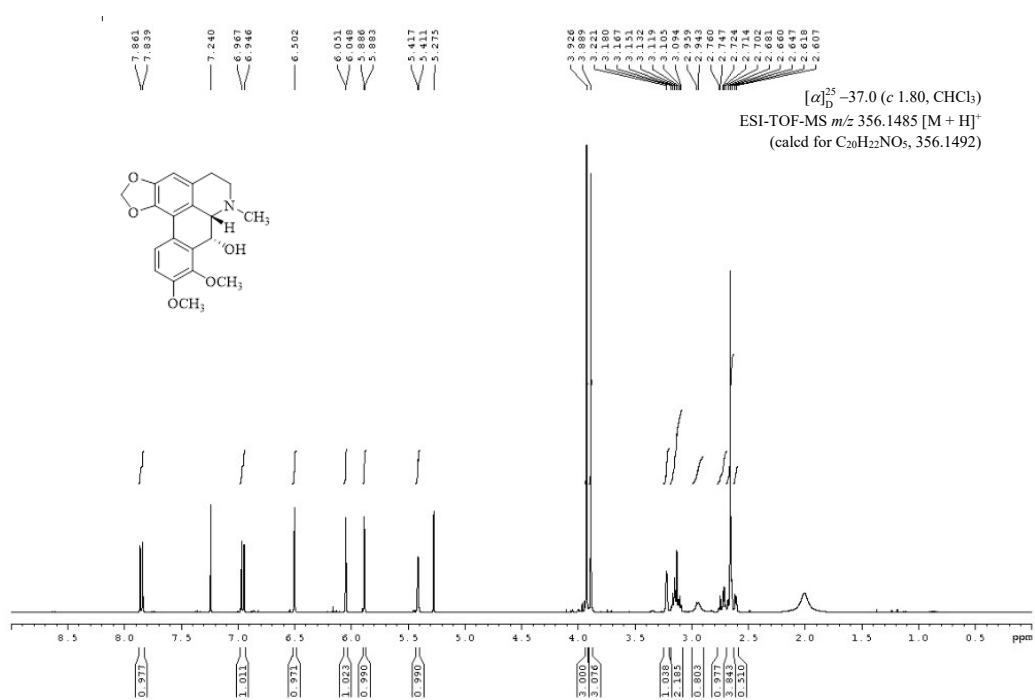

Figure S200.  $^1\text{H}$  NMR spectrum (CDCl<sub>3</sub>, 400 MHz) of sukhodianine (29)

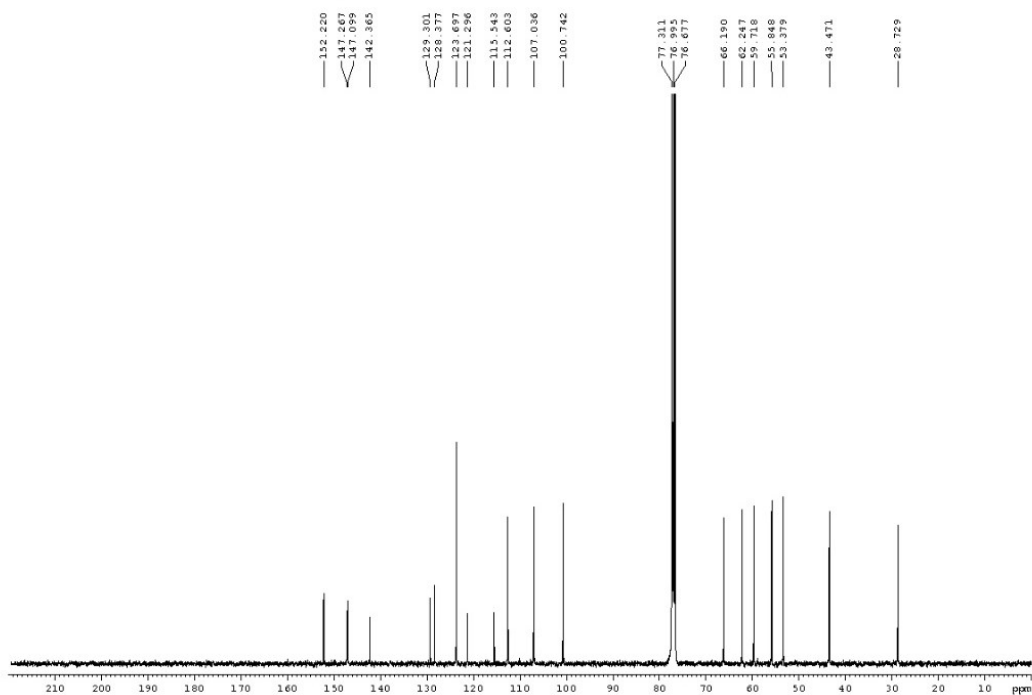

Figure S201.  $^{13}\text{C}$  NMR spectrum (CDCl<sub>3</sub>, 100 MHz) of sukhodianine (29)

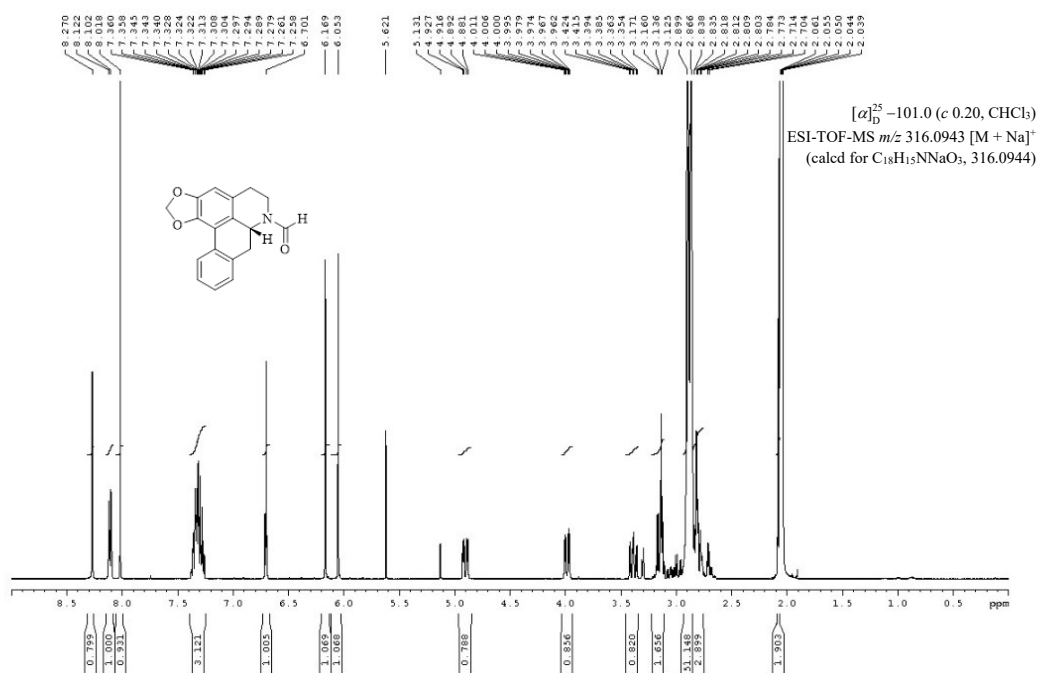

Figure S202.  $^1\text{H}$  NMR spectrum (Acetone-*d*<sub>6</sub>, 400 MHz) of (-)-*N*-fonylanonaine (30)

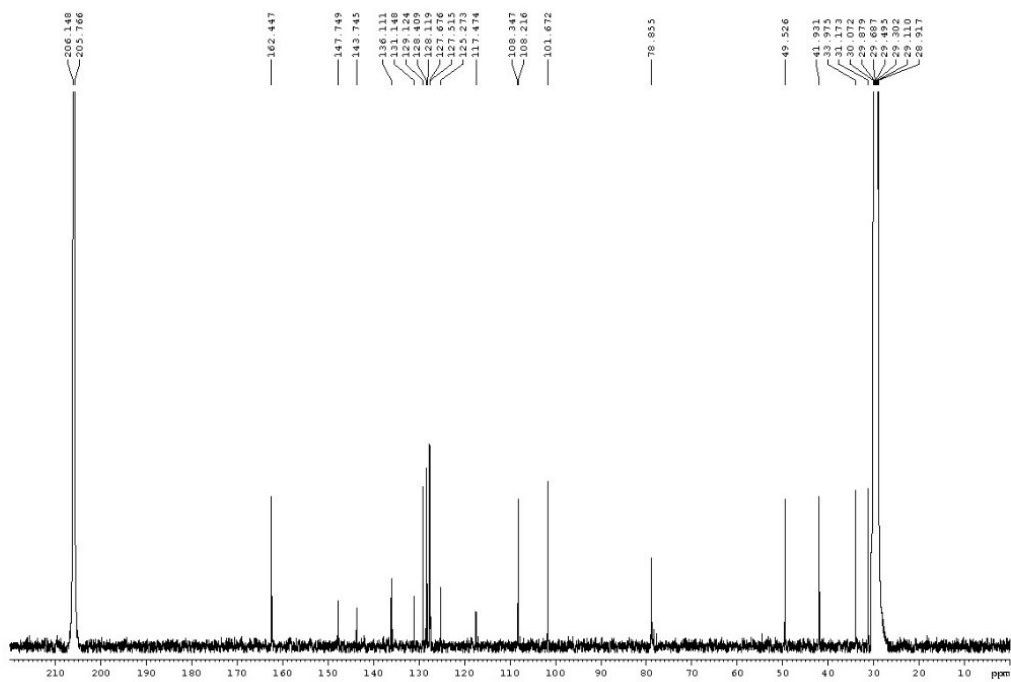

Figure S203.  $^{13}\text{C}$  NMR spectrum (Acetone- $d_6$ , 100 MHz) of (-)-*N*-fonylanonaine (**30**)

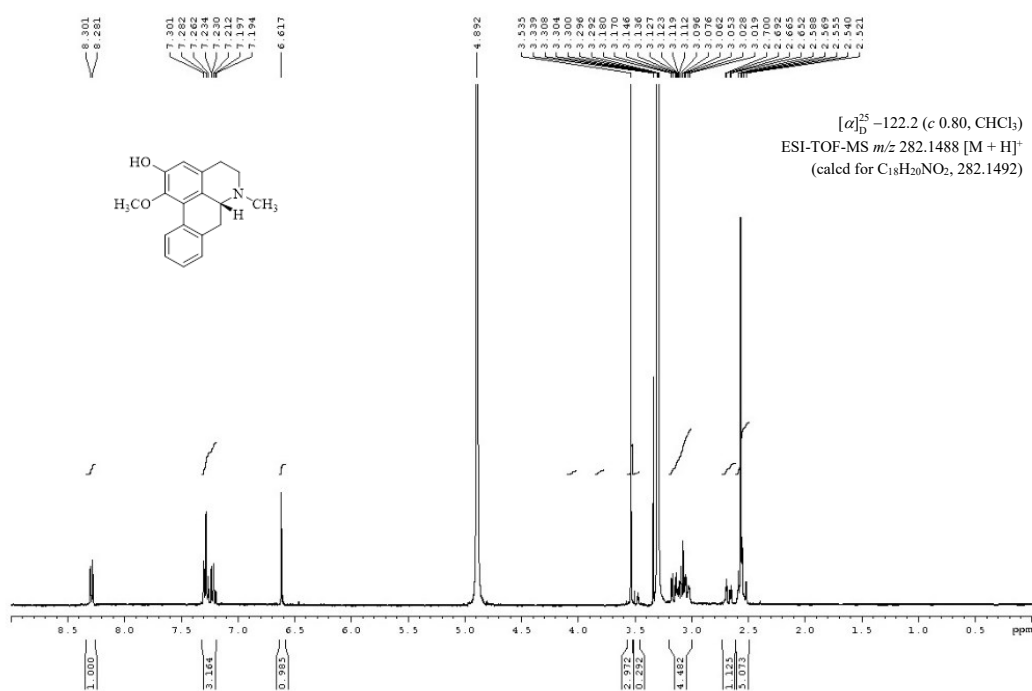

Figure S204.  $^1\text{H}$  NMR spectrum ( $\text{CD}_3\text{OD}$ , 400 MHz) of (-)-*N*-methylasimilobine (**31**)

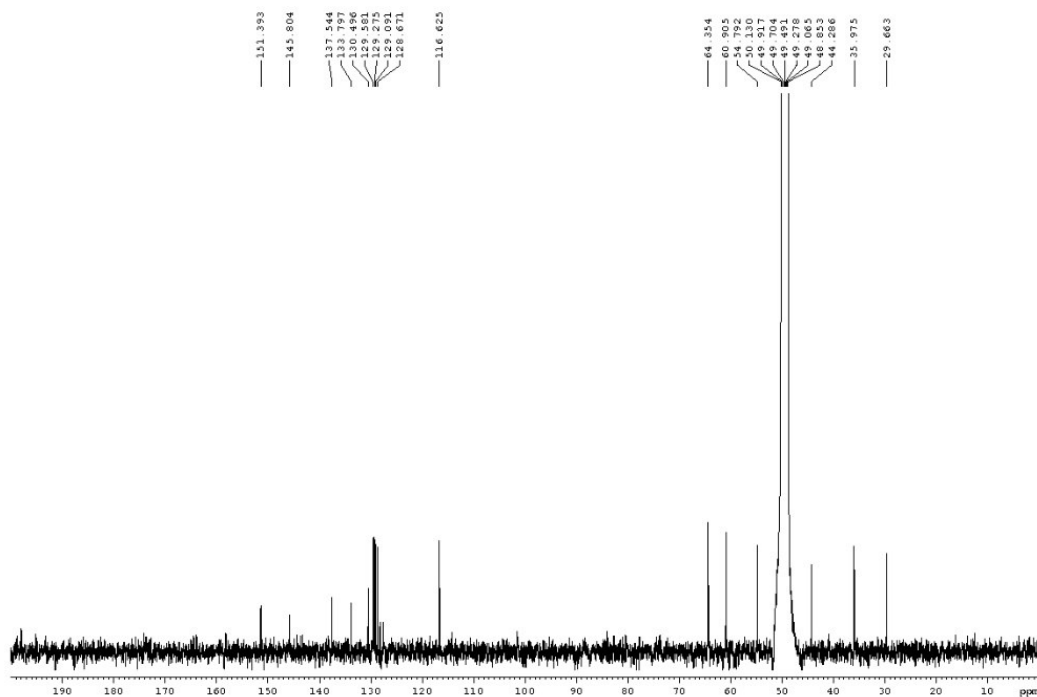

Figure S205.  $^{13}\text{C}$  NMR spectrum (CD<sub>3</sub>OD, 100 MHz) of (-)-N-methylasimilobine (31)

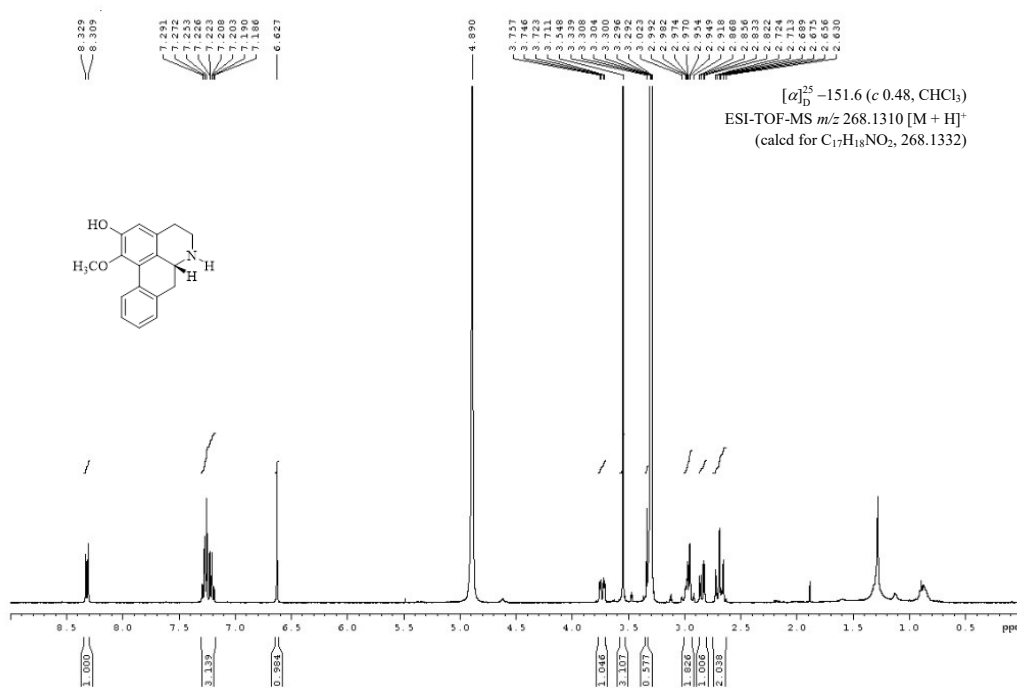

Figure S206.  $^1\text{H}$  NMR spectrum (CD<sub>3</sub>OD, 400 MHz) of (-)-asimilobine (32)





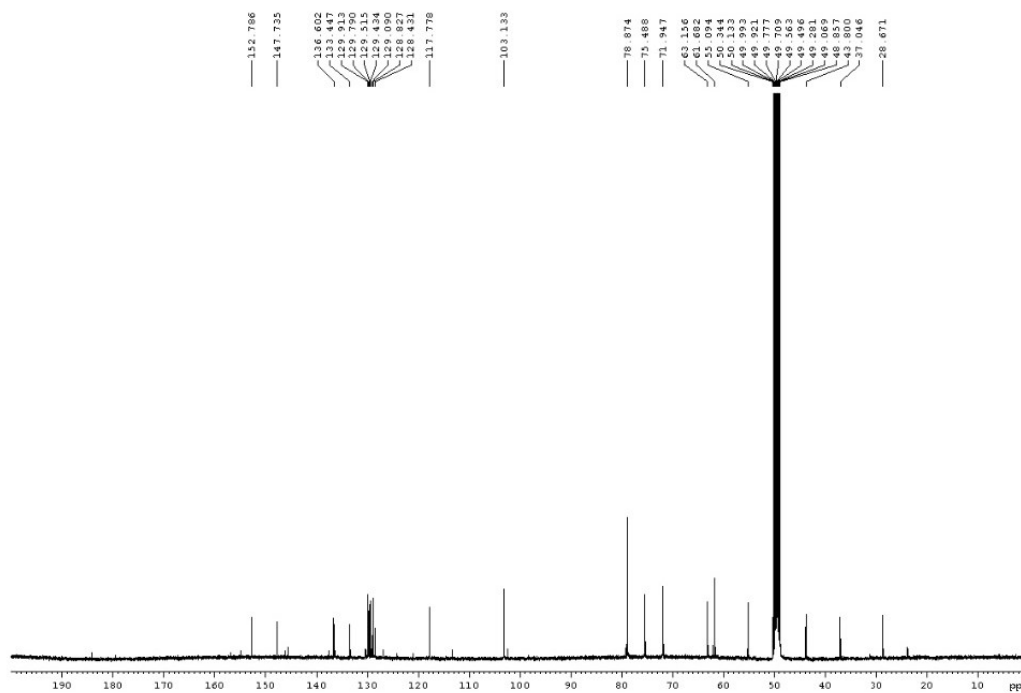

**Figure S209.** <sup>13</sup>C NMR spectrum (CD<sub>3</sub>OD, 100 MHz) of (-)-asimilobine-2-O-β-D-glucoside (33)

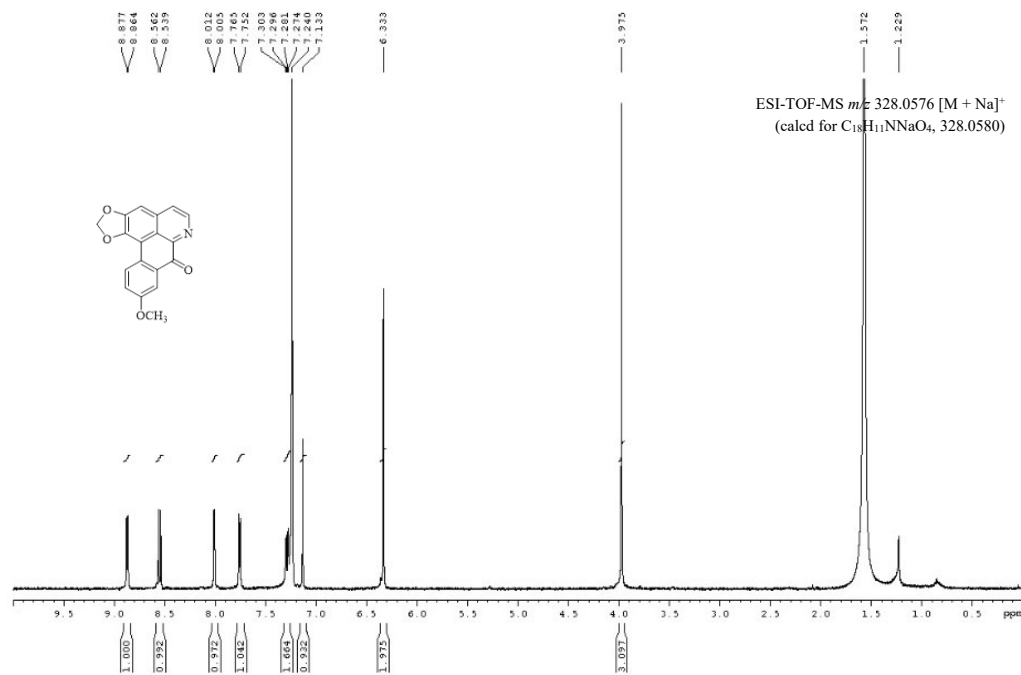

**Figure S210.** <sup>1</sup>H NMR spectrum (CDCl<sub>3</sub>, 400 MHz) of lanuginosine (34)

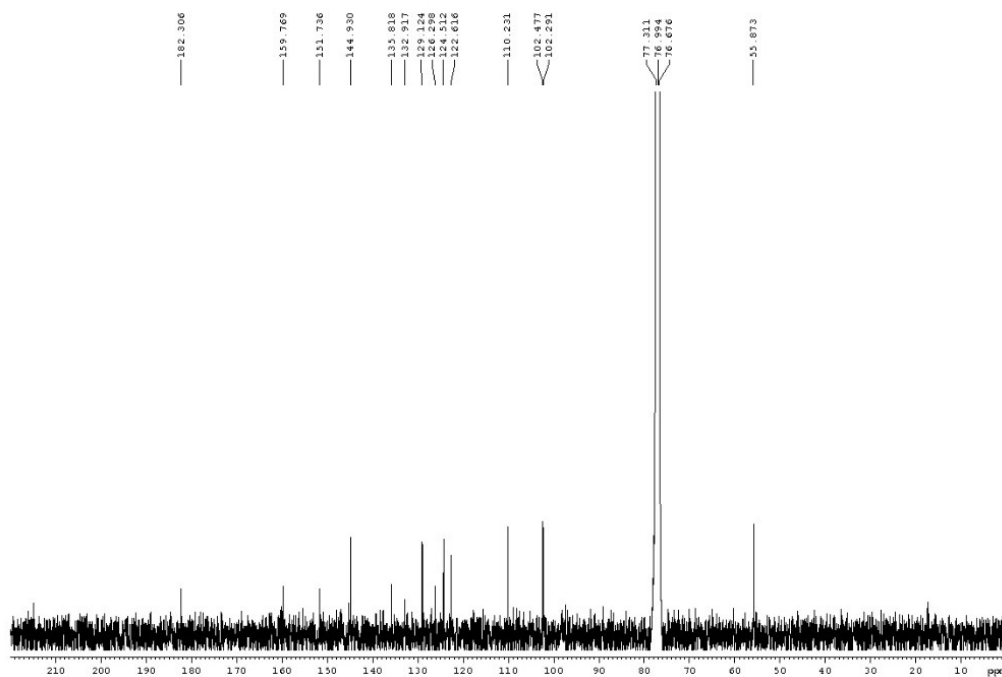

Figure S211.  $^{13}\text{C}$  NMR spectrum ( $\text{CDCl}_3$ , 100 MHz) of lanuginosine (34)

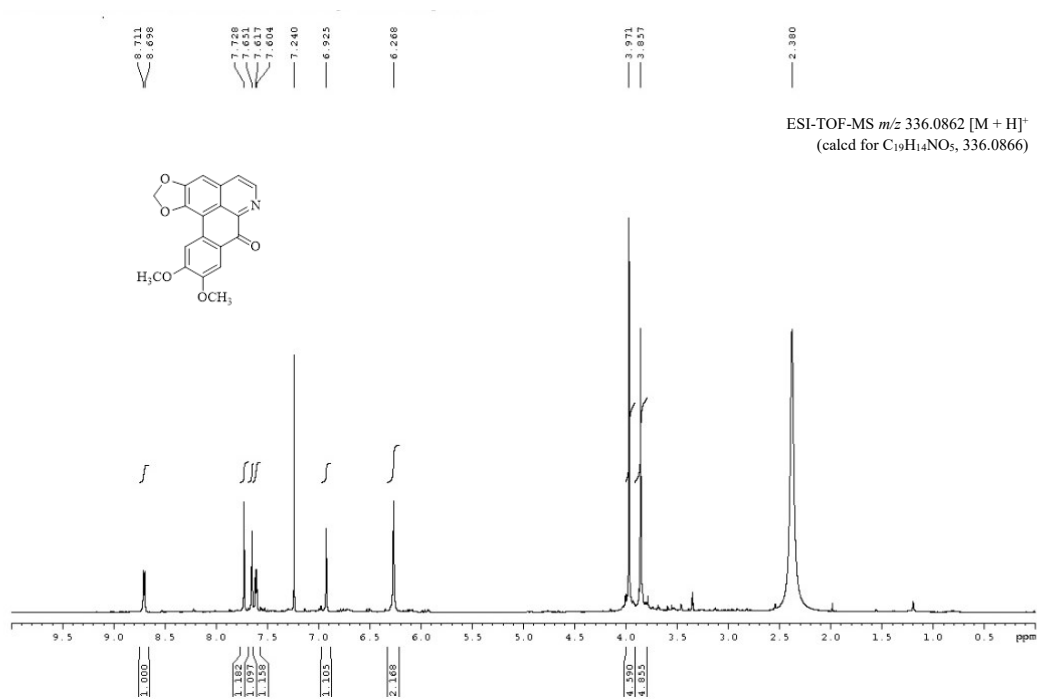

Figure S212.  $^1\text{H}$  NMR spectrum ( $\text{CDCl}_3 + 5$  drops  $\text{CD}_3\text{OD}$ , 400 MHz) of dicentrinone (35)

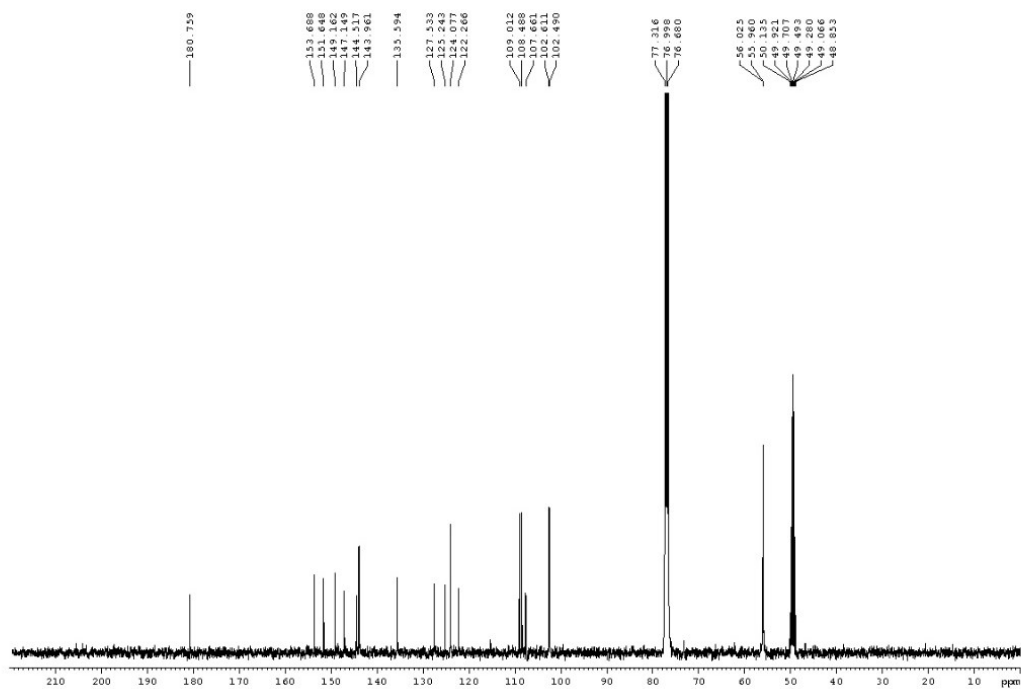

Figure S213.  $^{13}\text{C}$  NMR spectrum ( $\text{CDCl}_3 + 5$  drops  $\text{CD}_3\text{OD}$ , 100 MHz) of dicentrinone (**35**)

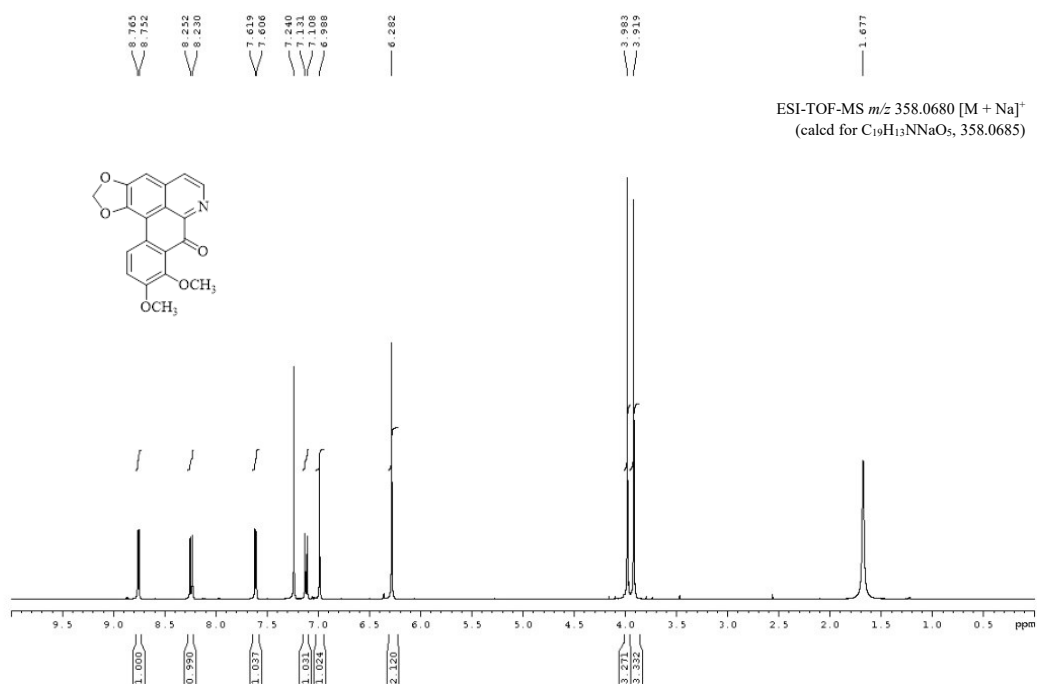

Figure S214.  $^1\text{H}$  NMR spectrum ( $\text{CDCl}_3$ , 400 MHz) of oxocrebanine (**36**)

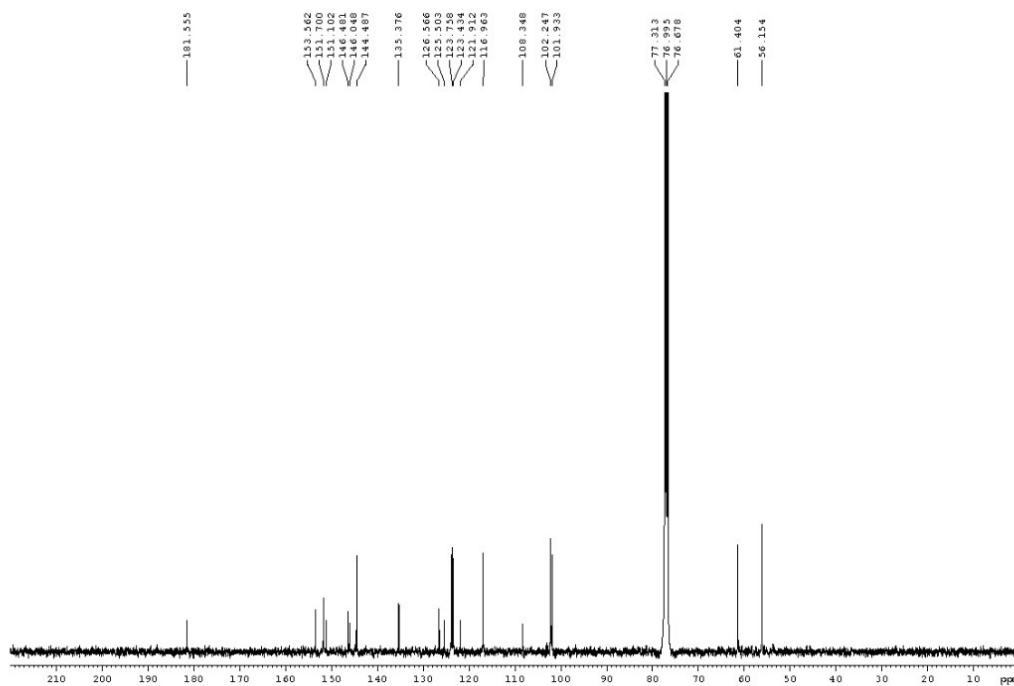

Figure S215.  $^{13}\text{C}$  NMR spectrum ( $\text{CDCl}_3$ , 100 MHz) of oxocrebanine (**36**)

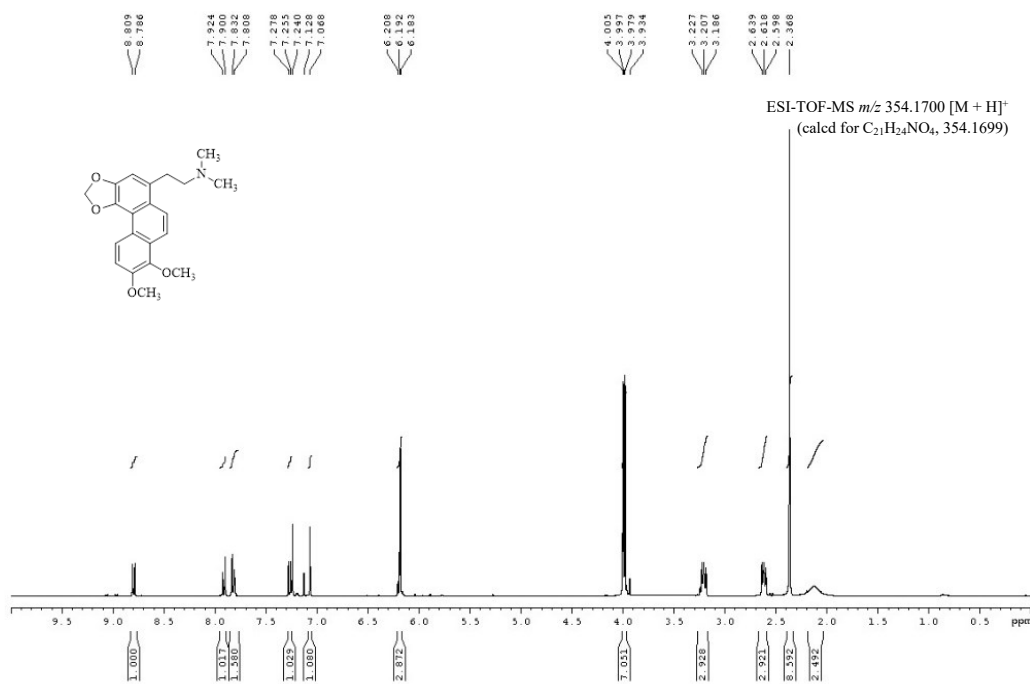

Figure S216.  $^1\text{H}$  NMR spectrum ( $\text{CDCl}_3$ , 400 MHz) of 8-methoxyuvoriopsine (**37**)

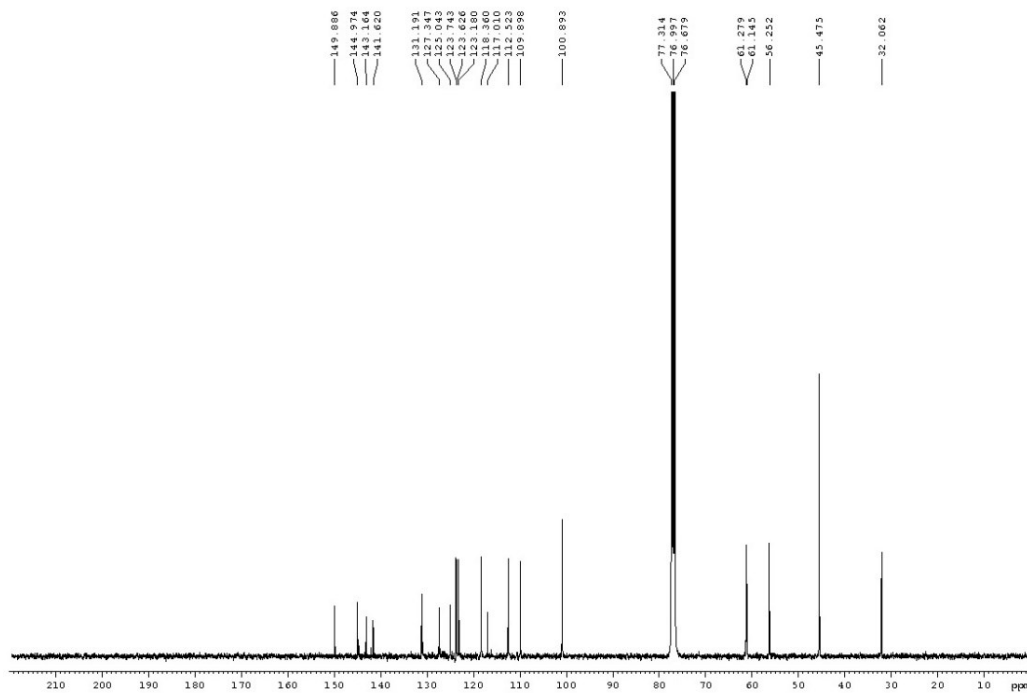

Figure S217. <sup>13</sup>C NMR spectrum (CDCl<sub>3</sub>, 100 MHz) of 8-methoxyyuvoriopsine (**37**)

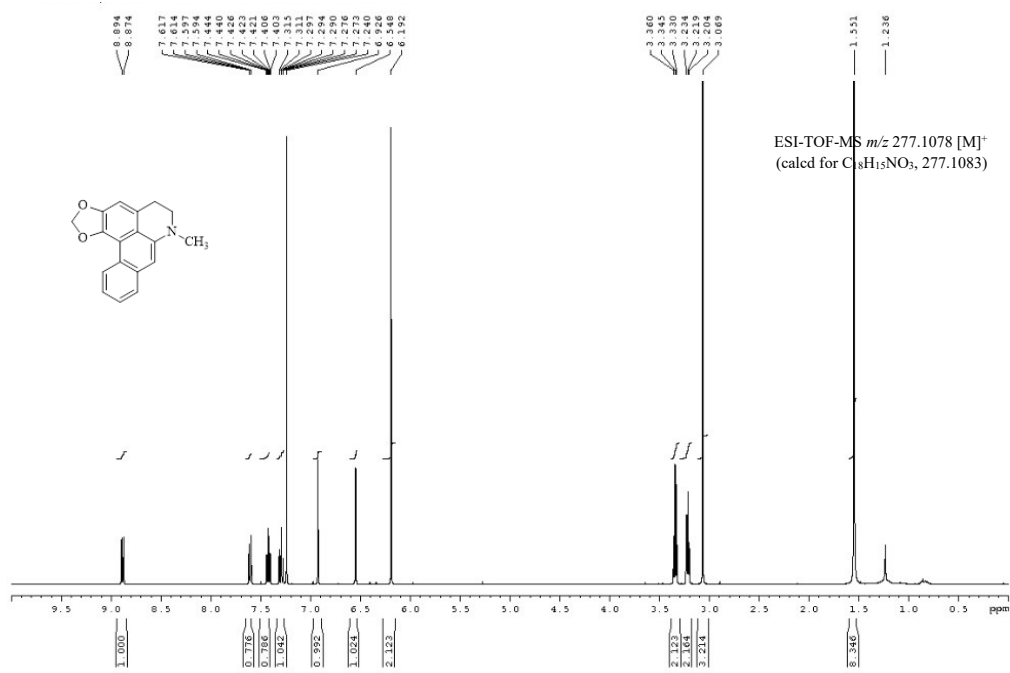

Figure S218. <sup>1</sup>H NMR spectrum (CDCl<sub>3</sub>, 400 MHz) of dehydroroemerine (**38**)

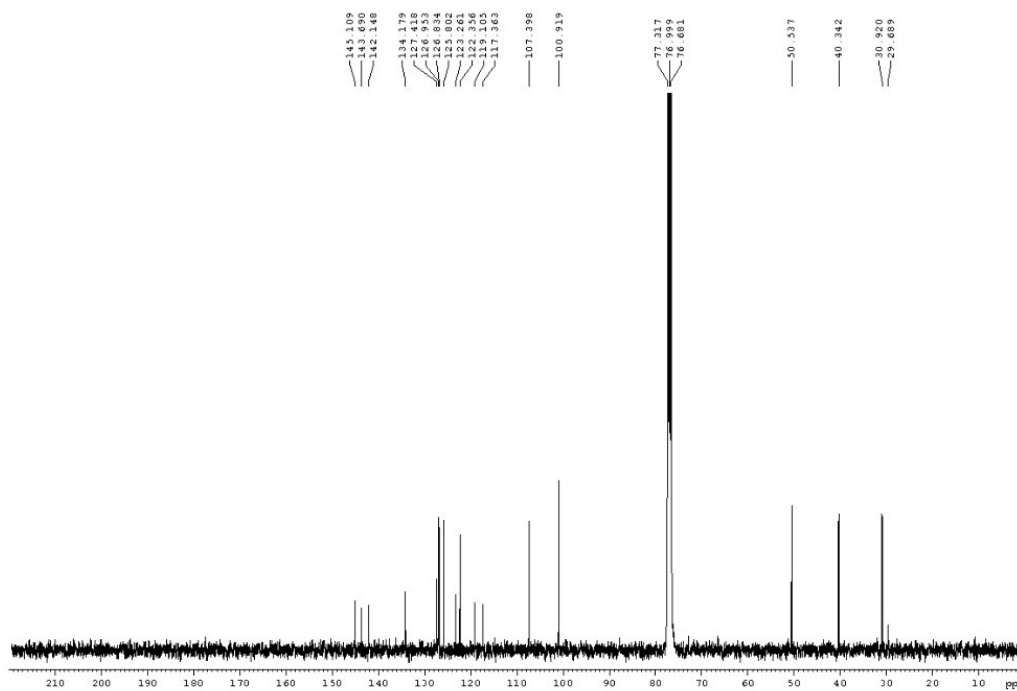

Figure S219. <sup>13</sup>C NMR spectrum (CDCl<sub>3</sub>, 100 MHz) of dehydroroemerine (38)

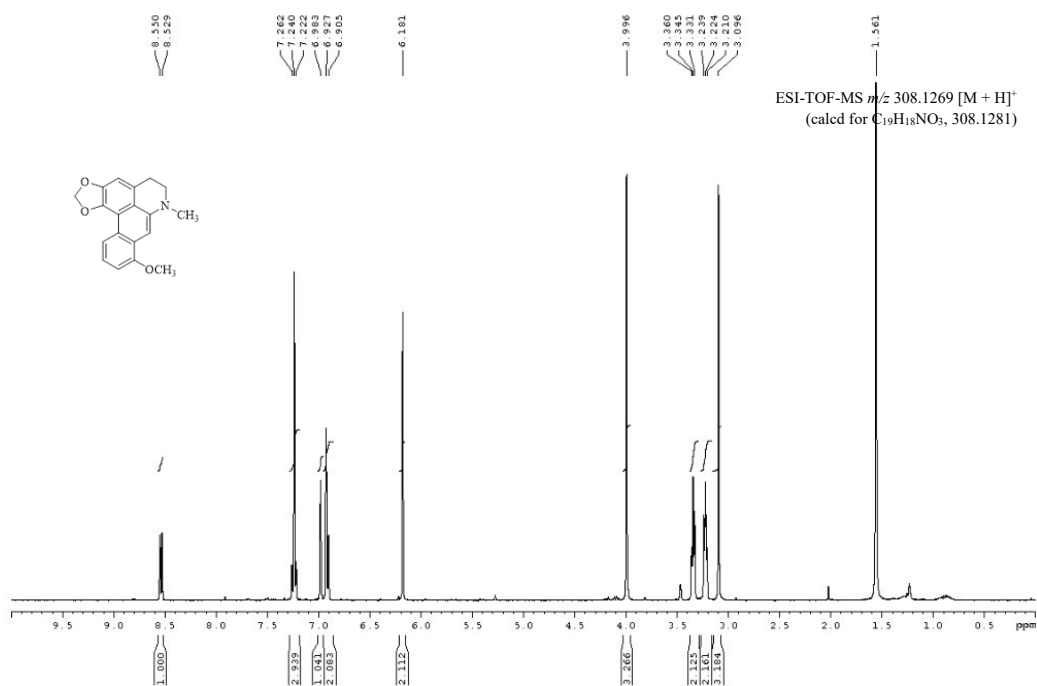

Figure S220. <sup>1</sup>H NMR spectrum (CDCl<sub>3</sub>, 400 MHz) of dehydrostephanine (39)

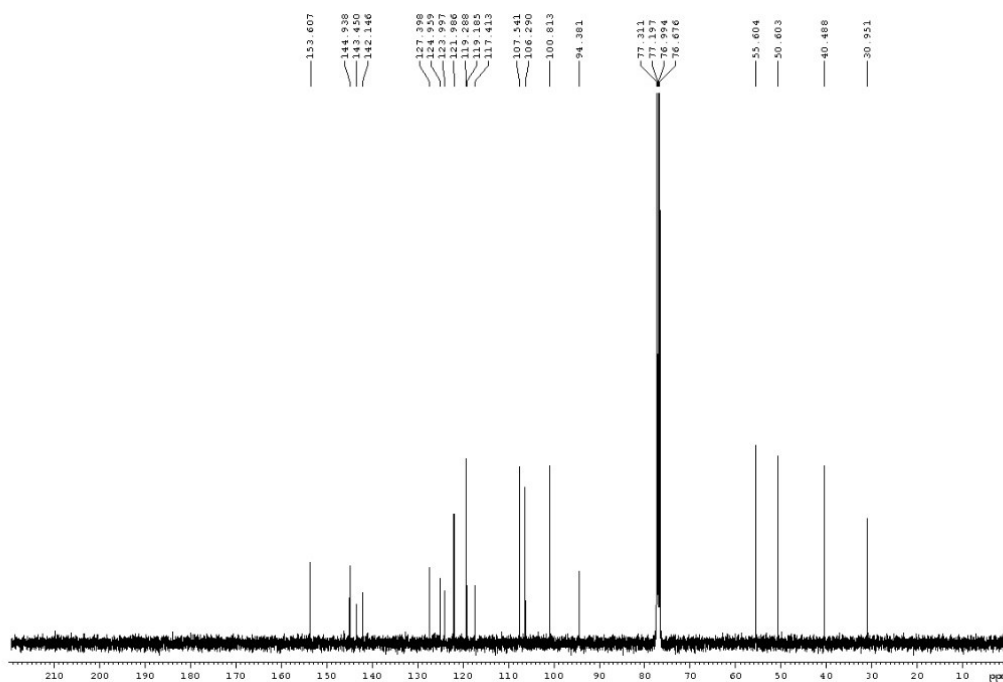

Figure S221. <sup>13</sup>C NMR spectrum (CDCl<sub>3</sub>, 100 MHz) of dehydrostephanine (39)

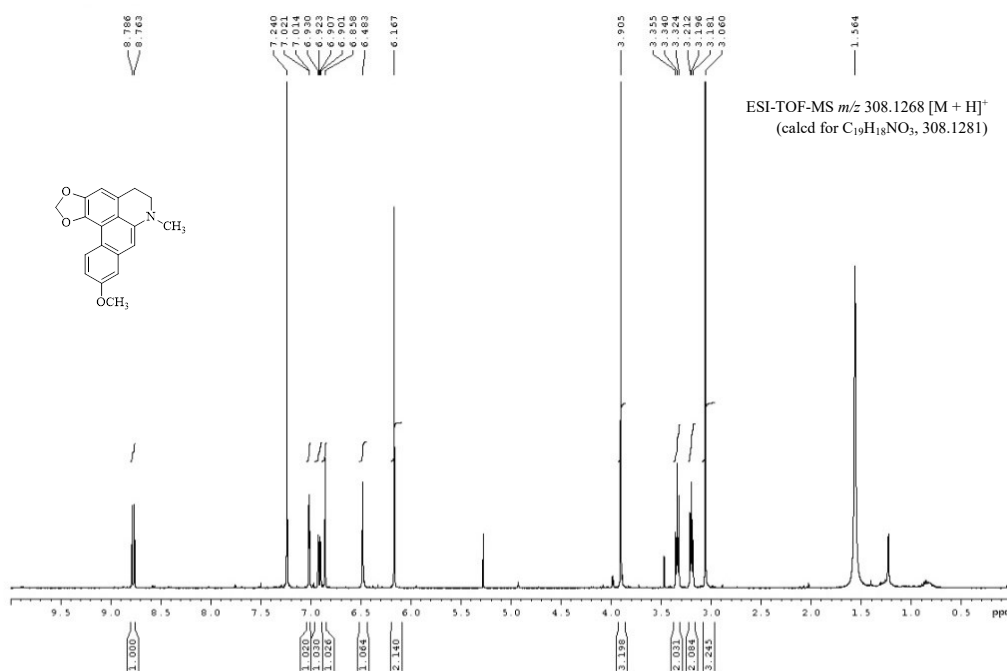

Figure S222. <sup>1</sup>H NMR spectrum (CDCl<sub>3</sub>, 400 MHz) of dehydroisolaureline (40)



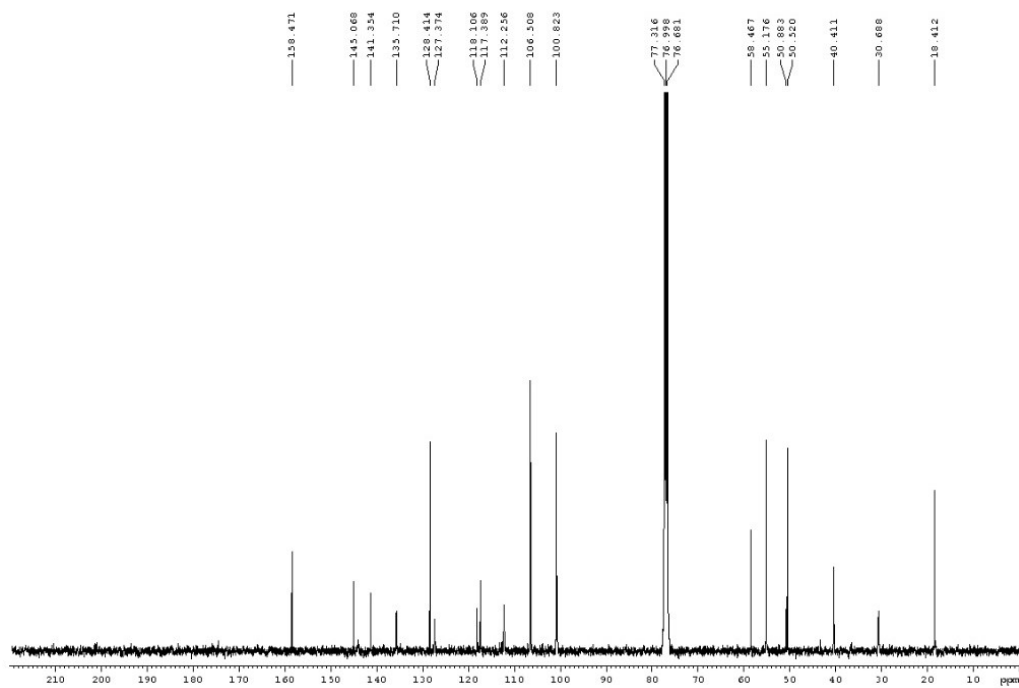

**Figure S223.**  $^{13}\text{C}$  NMR spectrum ( $\text{CDCl}_3$ , 100 MHz) of dehydroisolaureline (**40**)

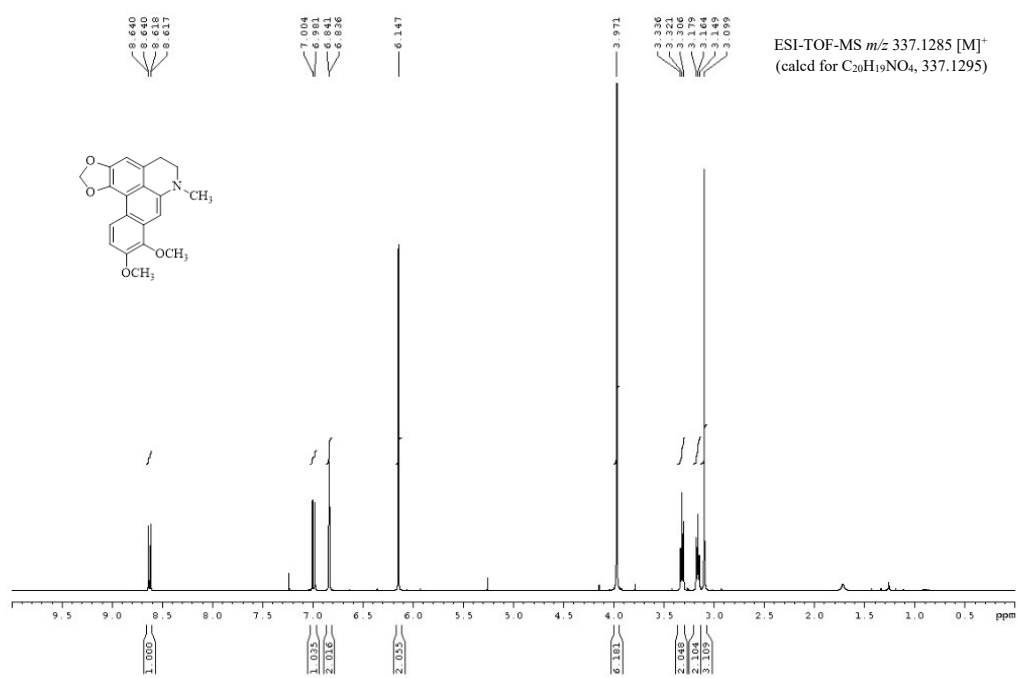

**Figure S224.**  $^1\text{H}$  NMR spectrum ( $\text{CDCl}_3$ , 400 MHz) of dehydrocrebanine (**41**)

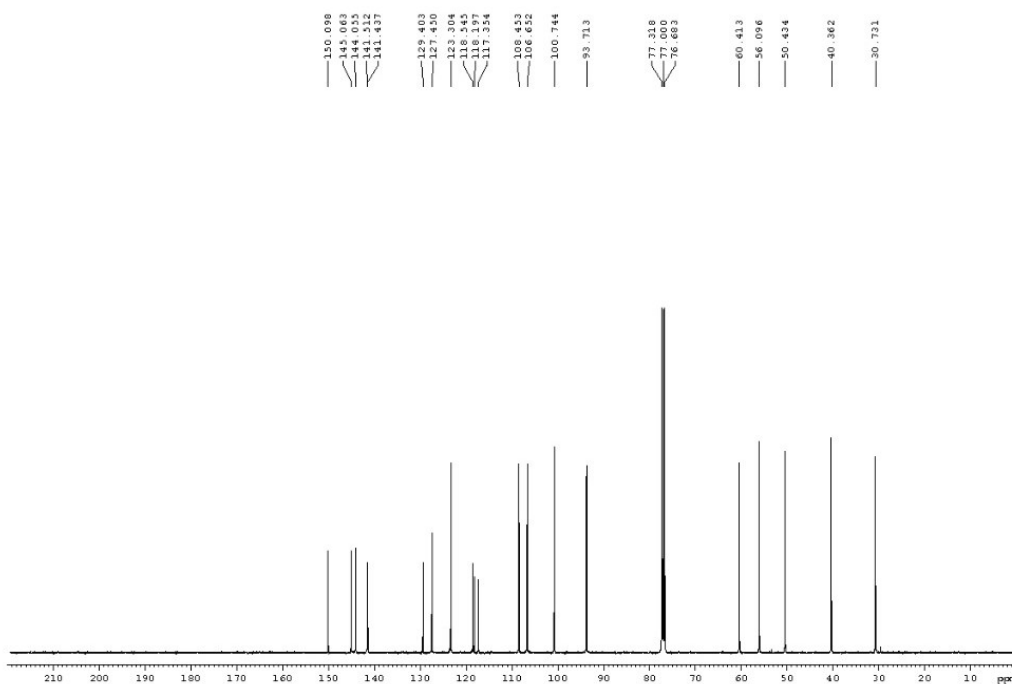

Figure S225. <sup>13</sup>C NMR spectrum (CDCl<sub>3</sub>, 100 MHz) of dehydrocrebanine (41)

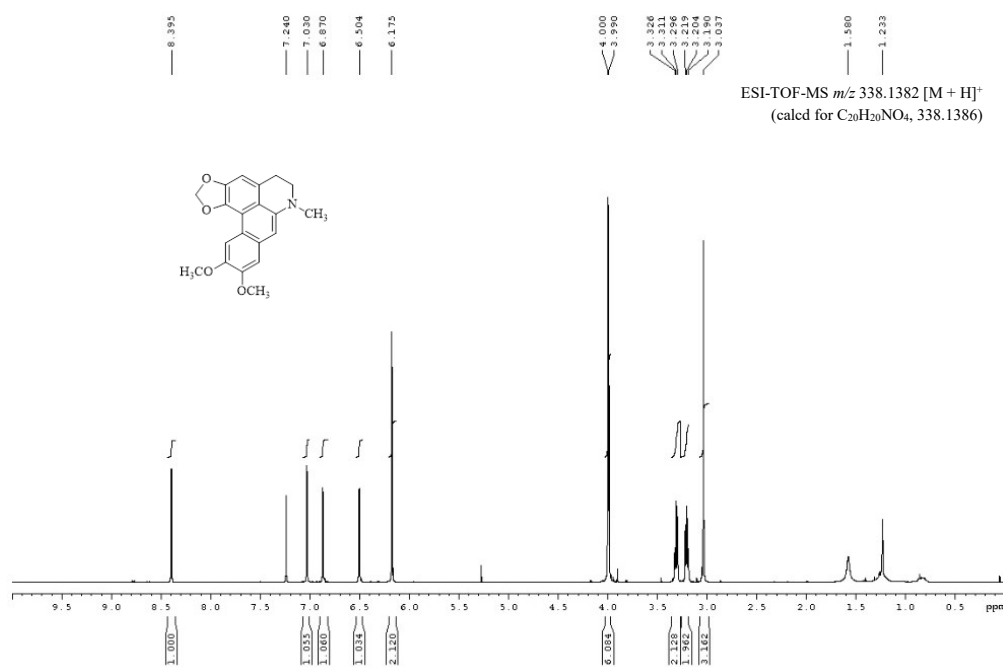

Figure S226. <sup>1</sup>H NMR spectrum (CDCl<sub>3</sub>, 400 MHz) of dehydrodicentrine (42)

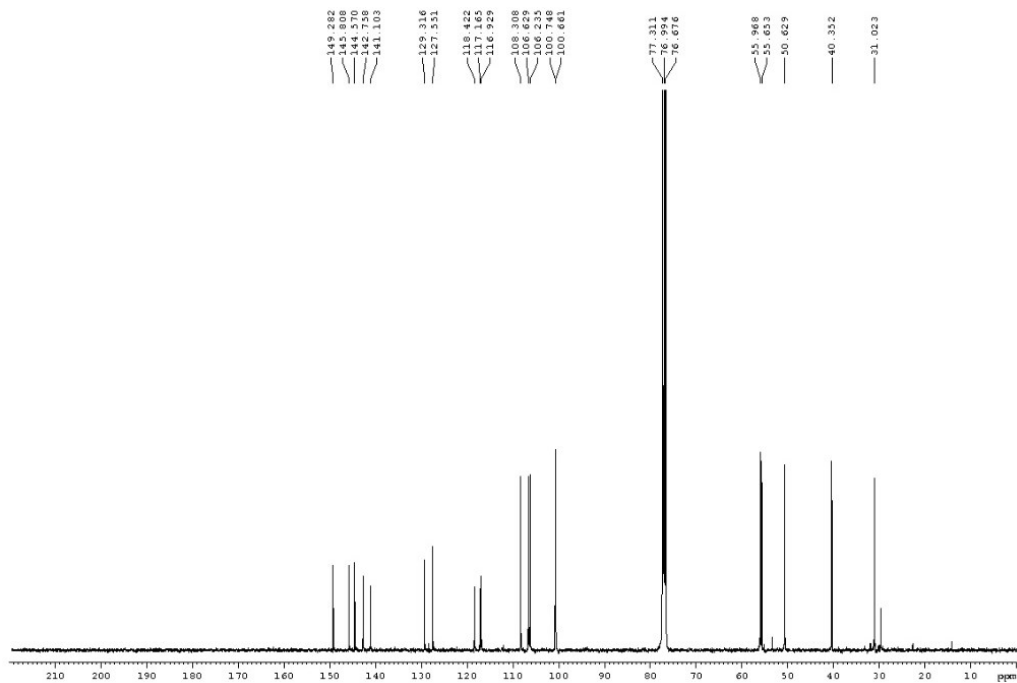

Figure S227.  $^{13}\text{C}$  NMR spectrum ( $\text{CDCl}_3$ , 100 MHz) of dehydrodicentrine (**42**)

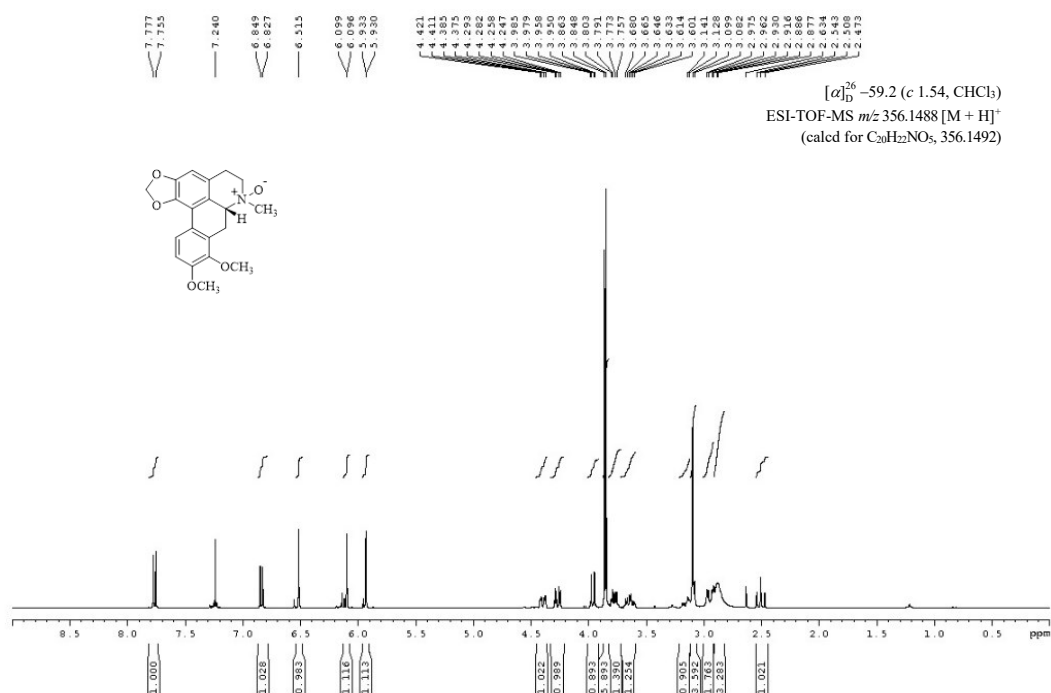

Figure S228.  $^1\text{H}$  NMR spectrum ( $\text{CDCl}_3$ , 400 MHz) of (-)-crebanine- $\beta$ -N-oxide (**43**)

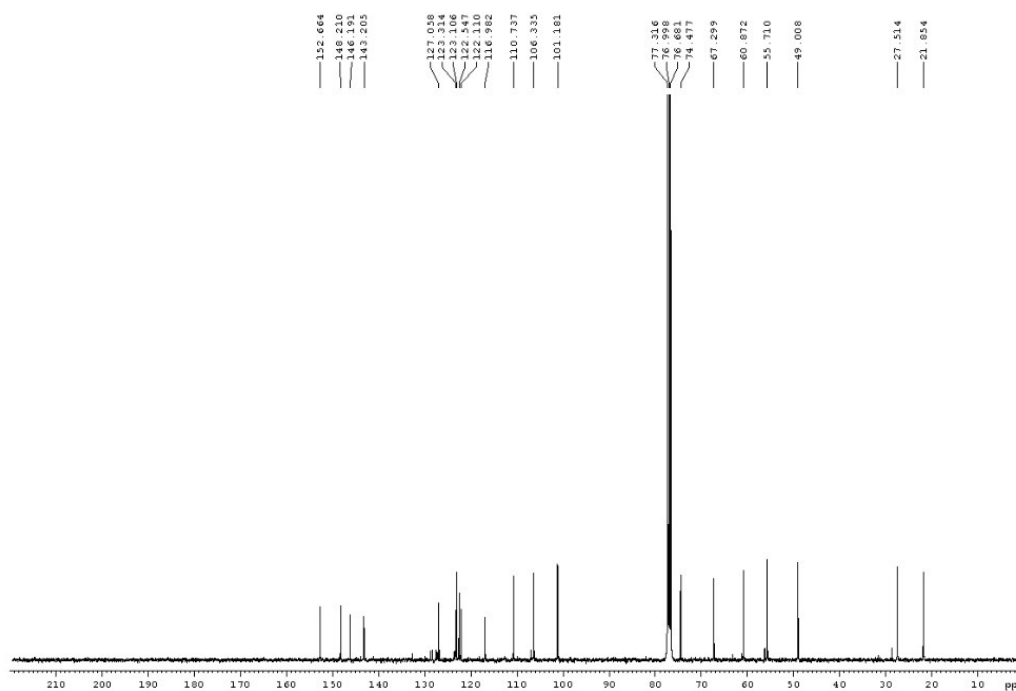

Figure S229.  $^{13}\text{C}$  NMR spectrum (CDCl<sub>3</sub>, 100 MHz) of (-)-crebanine- $\beta$ -*N*-oxide (43)

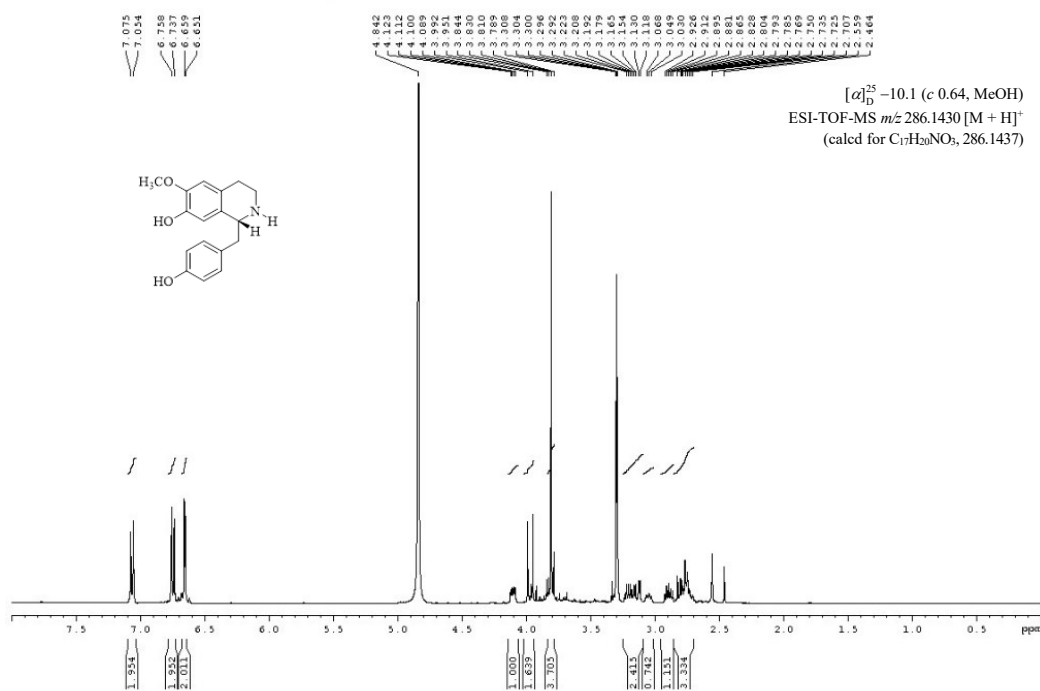

Figure S230.  $^1\text{H}$  NMR spectrum (CD<sub>3</sub>OD, 400 MHz) of coclaurine (44)

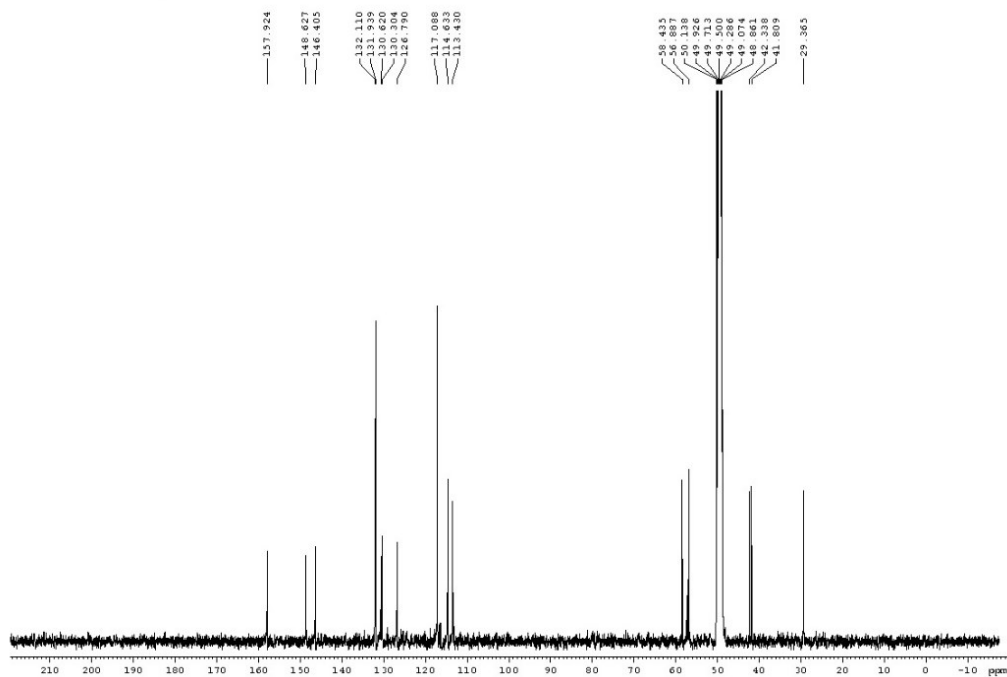

**Figure S231.** <sup>13</sup>C NMR spectrum (CD<sub>3</sub>OD, 100 MHz) of coclaurine (**44**)

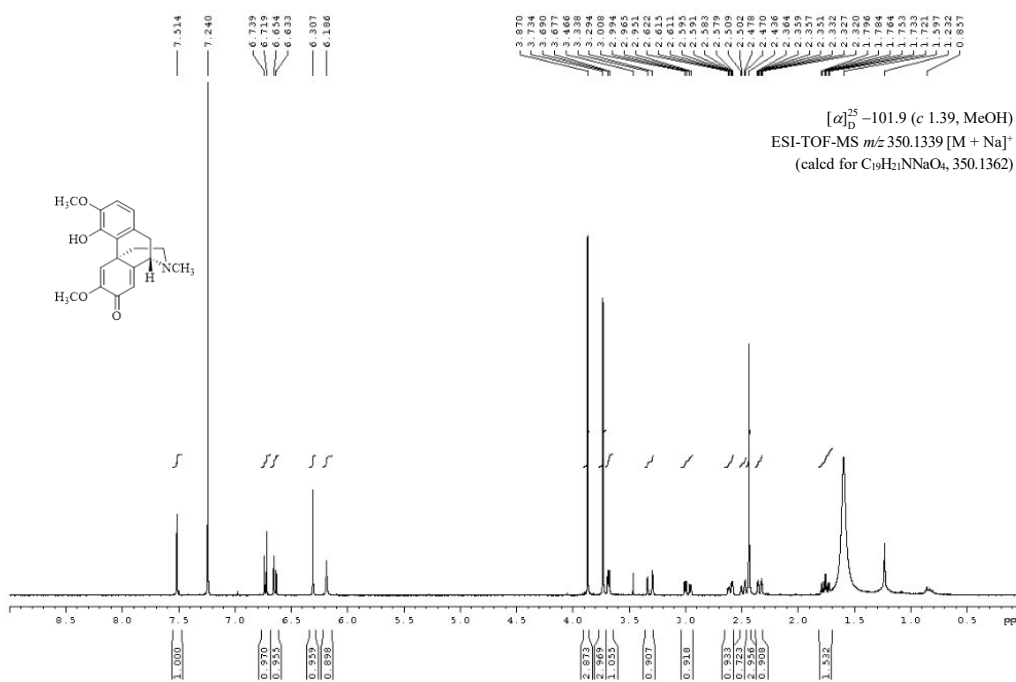

**Figure S232.** <sup>1</sup>H NMR spectrum (CDCl<sub>3</sub>, 400 MHz) of salutaridine (**45**)

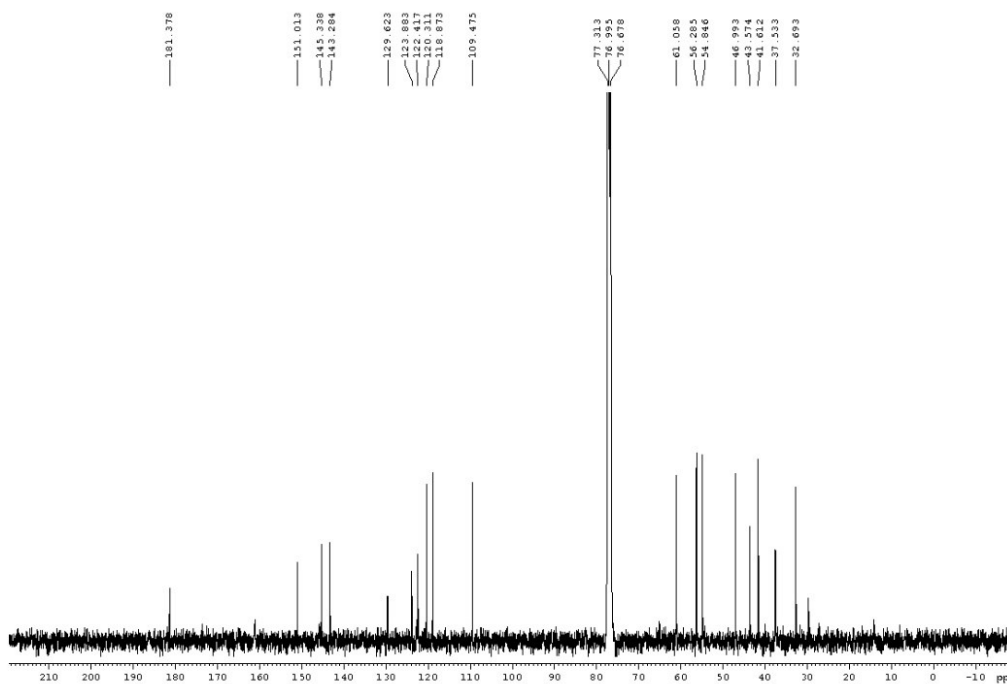

Figure S233.  $^{13}\text{C}$  NMR spectrum ( $\text{CDCl}_3$ , 100 MHz) of salutaridine (45)

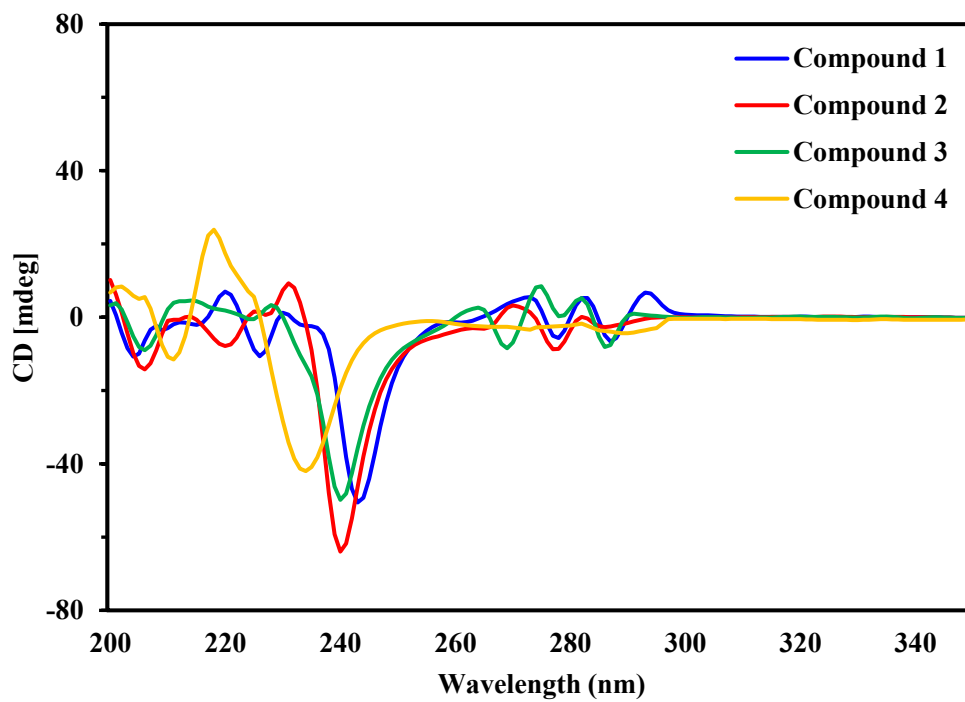

Figure S234. ECD spectra of stephapierrines A-D (1-4).

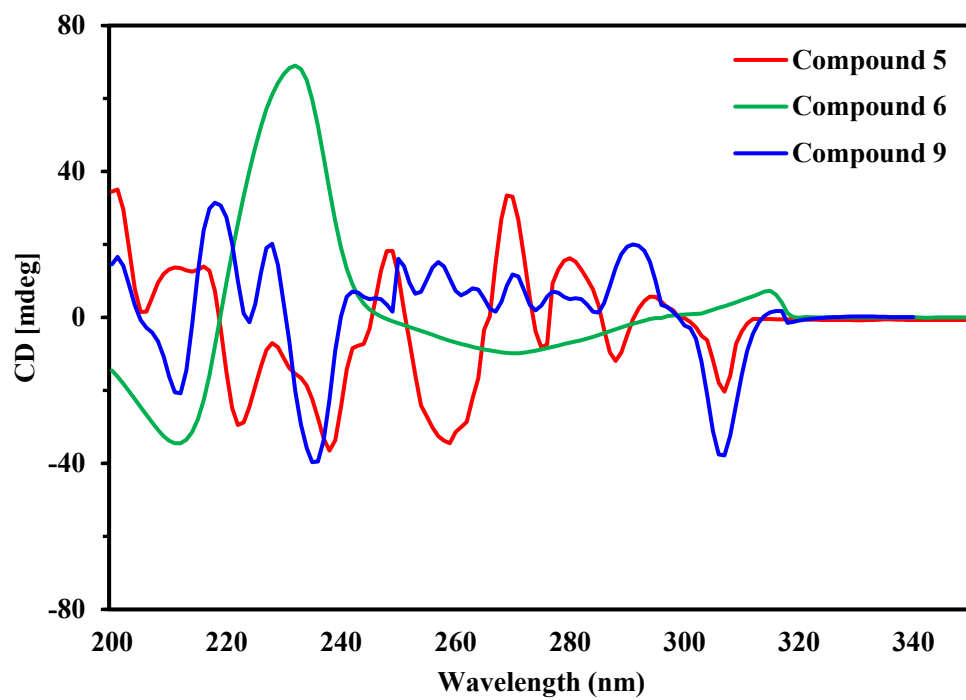

**Figure S235.** ECD spectra of stephapierrines E-F (**5-6**) and *O,N*-diacetylasimilobine (**9**).

**Table S1.** Cholinesterase inhibitory activities of aporphine alkaloids

|                                                                                     |                                                                                     |                                                                                     |                                                                                       |                                                                                       |                                                                                     |                                                                                     |               |
|-------------------------------------------------------------------------------------|-------------------------------------------------------------------------------------|-------------------------------------------------------------------------------------|---------------------------------------------------------------------------------------|---------------------------------------------------------------------------------------|-------------------------------------------------------------------------------------|-------------------------------------------------------------------------------------|---------------|
| 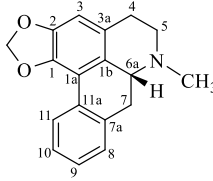   |    |    |    |    |  |  |               |
| <b>22</b>                                                                           | <b>23</b>                                                                           | <b>24</b>                                                                           | <b>25</b>                                                                             | <b>26</b>                                                                             | <b>30</b>                                                                           | <b>32</b>                                                                           |               |
| AChE <sup>a</sup>                                                                   | 8.32 ± 0.12                                                                         | 11.34 ± 0.20                                                                        | 11.94 ± 0.39                                                                          | 17.37 ± 0.22                                                                          | 6.11 ± 0.38                                                                         | 140.15 ± 0.83                                                                       | 141.47 ± 0.82 |
| BuChE <sup>a</sup>                                                                  | 2.85 ± 0.08                                                                         | 2.80 ± 0.07                                                                         | 16.58 ± 0.54                                                                          | 10.51 ± 0.27                                                                          | 26.41 ± 0.43                                                                        | inactive <sup>b</sup>                                                               | 10.08 ± 0.15  |
|    |    |  |                                                                                       |                                                                                       |                                                                                     |                                                                                     |               |
| <b>27</b>                                                                           | <b>28</b>                                                                           | <b>29</b>                                                                           |                                                                                       |                                                                                       |                                                                                     |                                                                                     |               |
| AChE <sup>a</sup>                                                                   | 17.63 ± 0.67                                                                        | 6.12 ± 0.63                                                                         | 4.30 ± 0.28                                                                           |                                                                                       |                                                                                     |                                                                                     |               |
| BuChE <sup>a</sup>                                                                  | 7.42 ± 0.16                                                                         | 5.87 ± 0.06                                                                         | 22.47 ± 0.10                                                                          |                                                                                       |                                                                                     |                                                                                     |               |
|  |  |  |  |  |                                                                                     |                                                                                     |               |
| <b>38</b>                                                                           | <b>39</b>                                                                           | <b>40</b>                                                                           | <b>41</b>                                                                             | <b>42</b>                                                                             |                                                                                     |                                                                                     |               |
| AChE <sup>a</sup>                                                                   | 1.21 ± 0.09                                                                         | 2.85 ± 0.24                                                                         | 147.18 ± 0.71                                                                         | 32.49 ± 0.52                                                                          | 1.09 ± 0.02                                                                         |                                                                                     |               |
| BuChE <sup>a</sup>                                                                  | 3.34 ± 0.02                                                                         | 3.26 ± 0.05                                                                         | 20.32 ± 0.39                                                                          | 14.11 ± 0.25                                                                          | 5.57 ± 0.15                                                                         |                                                                                     |               |

<sup>a</sup> IC<sub>50</sub> in μM<sup>b</sup> Inactive at 0.1 mg/ml



Table S1. (cont.)

|                    |                                                                                   |                                                                                     |                                                                                     |  |
|--------------------|-----------------------------------------------------------------------------------|-------------------------------------------------------------------------------------|-------------------------------------------------------------------------------------|--|
|                    | 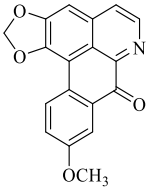 |  |  |  |
|                    | <b>34</b>                                                                         | <b>36</b>                                                                           | <b>35</b>                                                                           |  |
| AChE <sup>a</sup>  | 73.08 ± 0.33                                                                      | inactive <sup>b</sup>                                                               | 265.82 ± 0.80                                                                       |  |
| BuChE <sup>a</sup> | 13.60 ± 0.30                                                                      | inactive <sup>b</sup>                                                               | inactive <sup>b</sup>                                                               |  |
|                    |  |  |                                                                                     |  |
|                    | Galanthamine                                                                      | <b>43</b>                                                                           |                                                                                     |  |
| AChE <sup>a</sup>  | 1.21 ± 0.11                                                                       | inactive <sup>b</sup>                                                               |                                                                                     |  |
| BuChE <sup>a</sup> | 3.59 ± 0.07                                                                       | 150.57 ± 0.54                                                                       |                                                                                     |  |

<sup>a</sup> IC<sub>50</sub> in μM<sup>b</sup> Inactive at 0.1 mg/ml
